# Supplementary material for: Rational design of naphthoquinone-based antibacterial agents through iridium-catalyzed enantioselective β-allenylation of 2-hydroxynaphthoquinones
Source: Royal Society of Chemistry journal article supplement (doi:10.1039/d4qo01134a), 2024-01-01
Supplement: d4qo01134a1.pdf [file d4qo01134a1.pdf]

# Rational design of naphthoquinone-based antibacterial agents through iridium-catalyzed enantioselective $\beta$ -allenylation of 2-hydroxynaphthoquinones

Aditya Chakrabarty, Komal Jaiswal, Mrinmoy De\* and Santanu Mukherjee\*

*Department of Organic Chemistry, Indian Institute of Science, Bangalore 560 012, INDIA*

\*Corresponding author: E-mail: [sm@iisc.ac.in](mailto:sm@iisc.ac.in) and [md@iisc.ac.in](mailto:md@iisc.ac.in)

## Table of Contents

### SUPPORTING INFORMATION: PART A

|    |                                                                                 |      |
|----|---------------------------------------------------------------------------------|------|
| A. | General information                                                             | S-3  |
| B. | General procedure for the synthesis of naphthoquinones                          | S-4  |
| C. | General procedure for the synthesis of allenylic alcohols                       | S-4  |
| D. | Optimization studies for enantioselective allenylation of lawsone               | S-6  |
| E. | General procedure for the preparation of racemic products <i>rac</i> - <b>3</b> | S-7  |
| F. | General procedure for enantioselective allenylation of 1,4-naphthoquinones      | S-8  |
| G. | Procedure for the synthesis of <i>tert</i> -butyldimethylsilyl ether            | S-8  |
| H. | Unsuccessful substrates for enantioselective allenylation                       | S-18 |
| I. | Catalytic enantioselective synthesis <b>3aa</b> on a 2.0 mmol scale             | S-19 |
| J. | Procedure for the synthesis of <b>4</b>                                         | S-19 |
| K. | Procedure for the synthesis of thioether <b>5</b>                               | S-20 |
| L. | Procedure for Au-catalyzed cyclization of <b>3aa</b>                            | S-21 |
| M. | Procedure for Rh-catalyzed cyclization of <b>3aa</b>                            | S-22 |
| N. | Procedure for bromocyclization of <b>3aa</b>                                    | S-22 |
| O. | Procedure for iodocyclization of <b>3aa</b>                                     | S-24 |
| P. | Procedure for the synthesis of quinoxaline <b>11</b>                            | S-25 |
| Q. | General procedure for the hydrogenation of <b>3</b>                             | S-26 |
| R. | Procedure for the synthesis of <b>13</b>                                        | S-27 |
| S. | Procedure for the Pd-catalyzed reductive cleavage of enol triflate <b>13</b>    | S-28 |
| T. | Procedure for the Sonogashira coupling of <b>13</b> with phenylacetylene        | S-29 |
| U. | Single crystal X-ray diffraction analysis of <i>trans</i> - <b>10</b>           | S-29 |
| V. | Antibacterial Study – Materials and instrumentation                             | S-31 |
| W. | Estimation of MIC and MBC                                                       | S-32 |

|    |                      |      |
|----|----------------------|------|
| X. | Cell viability assay | S-36 |
|----|----------------------|------|

**SUPPORTING INFORMATION: PART B**

|  |                                    |      |
|--|------------------------------------|------|
|  | NMR Spectra and HPLC Chromatograms | S-38 |
|--|------------------------------------|------|

## A. General information:

Infrared (FT-IR) spectra were recorded on Bruker alfa FT-IR,  $\nu_{\max}$  in  $\text{cm}^{-1}$  and the bands are characterized as broad (br), strong (s), medium (m), and weak (w). NMR spectra were recorded on Bruker Ultrashield spectrometer at 400 MHz (for  $^1\text{H}$ -NMR), 100 MHz (for  $^{13}\text{C}$ -NMR) and 376 MHz (for  $^{19}\text{F}$ -NMR). Chemical shifts are reported in ppm from tetramethylsilane with the solvent resonance as internal standard ( $\text{CDCl}_3$ :  $\delta$  7.26 for  $^1\text{H}$ -NMR and  $\delta$  77.16 for  $^{13}\text{C}$ -NMR). For  $^1\text{H}$ -NMR, data are reported as follows: chemical shift, multiplicity (s = singlet, d = doublet, dd = double doublet, ddd = doublet of doublet of doublets, t = triplet, q = quartet, sept = septet, br = broad, m = multiplet), coupling constants (Hz) and integration. High resolution mass spectrometry was performed on XEVO G2-XS QToF instrument. Optical rotations were measured on JASCO P-2000 polarimeter. Melting points were measured in an open glass capillary on a Buchi M-560 melting point apparatus. Enantiomeric ratios were determined by Shimadzu LC-20AD HPLC instrument and SPD-20A Diode Array detector using stationary phase chiral columns (25 cm  $\times$  0.46 cm) in comparison with authentic racemic compounds.

Unless stated otherwise, all reactions were carried out with distilled and dried solvents under an atmosphere of nitrogen or argon in oven (120  $^\circ\text{C}$ ) dried glassware with standard vacuum-line techniques. The reactions, which required heating, were carried out in a pre-heated oil bath at the specified temperature. Organic solvents used for carrying out reactions were dried using standard methods.  $[\text{Ir}(\text{COD})\text{Cl}]_2$  was purchased from Merck; (*S*)-BINOL and (*R*)-BINOL were purchased from Combi-Blocks; Naphthoquinone **1a** was purchased from Merck and used as received. Other naphthoquinones (**1b-1f**) were prepared according to the literature procedure.<sup>1</sup> All work up and purification were carried out with reagent-grade solvents in air.<sup>2</sup> Thin-layer chromatography was performed using Merck silica gel 60 F<sub>254</sub> pre-coated plates (0.25 mm). Column chromatography was performed using silica gel (230-400 or 100-200 mesh). NMR yields were determined by using mesitylene as an internal standard. Unless otherwise noted, all reported yields of the Ir-catalyzed  $\beta$ -allenylation reactions correspond to the isolated yield after chromatographic purification. Chiral ligands used in this work were prepared according to the literature procedure.<sup>3</sup>

---

<sup>1</sup>L. Wu, X. Ma, X. Yang, C. Zhang, *Eur. J. Med. Chem.* **2020**, 203, 112594.

<sup>2</sup> W. L. F. Armarego, C. L. L. Chai, *Purification of Laboratory Chemicals* (Fifth Edition); Butterworth-Heinemann: Burlington, 2003.

<sup>3</sup>C. Defieber, M. A. Ariger, P. Moriel, E. M. Carreira, *Angew. Chem., Int. Ed.* **2007**, 46, 3139.

**B. General procedure for the synthesis of 2-hydroxy naphthoquinones:**

**General procedure:** Naphthoquinones (**1b-f**) were prepared according to the previously reported procedure.<sup>1</sup>

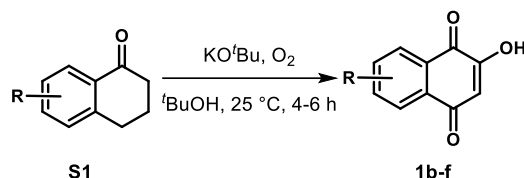

In an oven dried 50 mL round-bottom flask, 5 mL of anh. <sup>t</sup>BuOH was taken and purged with O<sub>2</sub> for 15 min. To this oxygen-saturated solution of <sup>t</sup>BuOH,  $\alpha$ -tetralone **S1** (1.0 equiv) and KO<sup>t</sup>Bu (2.5 equiv) were added sequentially under a positive O<sub>2</sub> atmosphere. The resulting deep red heterogenous solution was then allowed to stir at ambient temperature for 4-6 h under O<sub>2</sub> atmosphere. Upon completion (monitored by TLC), the reaction mixture was quenched with dropwise addition of 1 (N) HCl until the pH of the solution reached 2. The yellow precipitate was filtered and washed with hexane (3  $\times$  2 mL) and dried under reduced pressure to obtain a yellow solid (**1b-f**). The spectroscopic data of the naphthoquinones (**1b-f**) thus obtained were found to be consistent with the literature.

**C. General procedure for the synthesis of allenylc alcohols:**

Allenylc alcohols (**2a-r**) were prepared according to the reported literature procedure.<sup>4</sup>

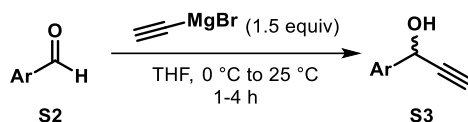

In an oven dried 100 mL round-bottom flask, aldehyde **S2** (1.0 gm, 1.0 equiv) was dissolved in 30 mL of anh. THF under positive argon pressure and the resulting solution was cooled to 0  $^\circ$ C. To this, ethynylmagnesium bromide (0.5 M in THF, 1.5 equiv) was added dropwise over 10 min via a syringe. The reaction mixture was then allowed to attain ambient temperature over 30 min. Upon completion (TLC in 10% EtOAc in petroleum ether), the reaction was quenched with 10 mL of saturated aqueous NH<sub>4</sub>Cl and diluted with 10 mL of distilled H<sub>2</sub>O. The organic phase was separated, and the aqueous phase was extracted with EtOAc (2  $\times$  5 mL). The combined organic phase was washed with brine (3 mL), dried over anh. Na<sub>2</sub>SO<sub>4</sub> and concentrated under reduced pressure to obtain a yellow oil. The crude residue was purified by silica gel flash column chromatography (3-4% EtOAc in petroleum ether) to obtain propargylic alcohol **S3** (90 to >99% yield).

<sup>1</sup>L. Wu, X. Ma, X. Yang, C. Zhang, *Eur. J. Med. Chem.* **2020**, 203, 112594.

<sup>4</sup>(a) H. Luo, S. Ma, *Eur. J. Org. Chem.* **2013**, 2013, 3041; (b) M. Isomura, D. A. Petrone, E. M. Carreira, *J. Am. Chem. Soc.* **2019**, 141, 4738.

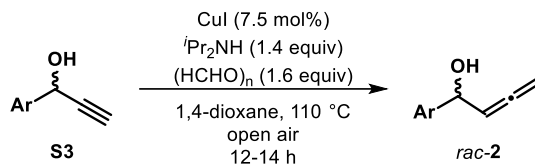

In a 100 mL two neck round-bottom flask equipped with a water-cooled reflux condenser, CuI (7.5 mol%) and paraformaldehyde (1.6 equiv) were dissolved in 10 mL of 1,4-dioxane. To this,  $i\text{Pr}_2\text{NH}$  (1.4 equiv) was added, and the resulting solution was heated to 110 °C in open air. After 5 min, a solution of propargylic alcohol **S3** in 10 mL of 1,4-dioxane was added dropwise and the reaction mixture was allowed to stir at 110 °C for 12-14 h. Upon completion (TLC in 10% EtOAc in petroleum ether), the reaction mixture was filtered through a short pad of Celite<sup>®</sup>, washed with  $\text{CH}_2\text{Cl}_2$  and concentrated under reduced pressure to obtain a brown oil. The residue was purified by silica gel flash column chromatography (3-6% EtOAc in petroleum ether) to obtain *rac*-**2** (80 to 89% yield).

## D. Optimization studies for enantioselective allenylation of Lawsone:

Table S1. Promoter screening <sup>a</sup>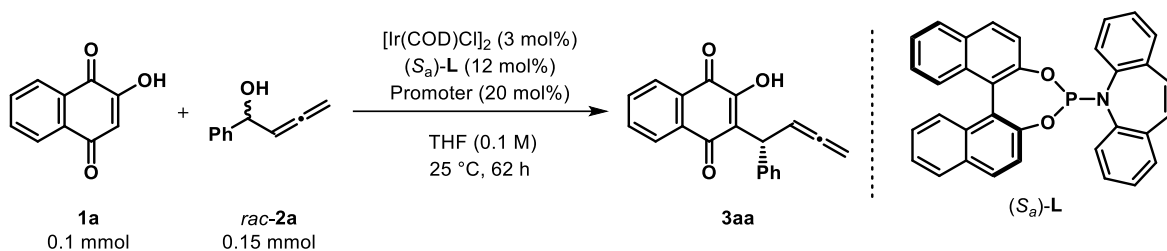

| Entry               | promoter                           | NMR yield (%)         | er <sup>c</sup> |
|---------------------|------------------------------------|-----------------------|-----------------|
| 1                   | Sc(OTf) <sub>3</sub>               | 11                    | n.d             |
| 2                   | La(OTf) <sub>3</sub>               | 72 (65 <sup>b</sup> ) | >99.5:0.5       |
| 3                   | Fe(OTf) <sub>2</sub>               | 66 <sup>b</sup>       | >99.9:0.1       |
| 4                   | Zn(OTf) <sub>2</sub>               | <5                    | n.d             |
| 5                   | BF <sub>3</sub> .Et <sub>2</sub> O | <5                    | n.d             |
| 6 <sup>d,e,g</sup>  | Fe(OTf) <sub>2</sub>               | 76                    | >99.9:0.1       |
| 7 <sup>d,f,g</sup>  | Bi(OTf) <sub>3</sub>               | 31                    | >99.9:0.1       |
| 8 <sup>d,f,g</sup>  | InCl <sub>3</sub>                  | 43                    | n.d.            |
| 9 <sup>d,f,g</sup>  | InBr <sub>3</sub>                  | 29                    | n.d.            |
| 10 <sup>d,f,g</sup> | Yb(OTf) <sub>3</sub>               | 17                    | n.d.            |
| 11 <sup>d,f,g</sup> | ZnCl <sub>2</sub>                  | <5                    | n.d.            |
| 12 <sup>d,e,g</sup> | La(OTf) <sub>3</sub>               | 85                    | >99.9:0.1       |
| 13 <sup>d,f,g</sup> | La(OTf) <sub>3</sub>               | (83 <sup>b</sup> )    | >99.9:0.1       |

<sup>a</sup>Reactions were carried out on a 0.1 mmol scale. <sup>b</sup>Yields correspond to the isolated yield after chromatographic purification. <sup>c</sup>Enantiomeric ratio (er) as determined by HPLC analysis on a chiral stationary phase. <sup>d</sup>10mol % of promoter was used. <sup>e</sup>Using 2.0 equiv of *rac*-**2a**. <sup>f</sup>Using 1.5 equiv of **1a**. <sup>g</sup>Reaction time was 48 h.

**Table S2.** Solvent screening <sup>a</sup>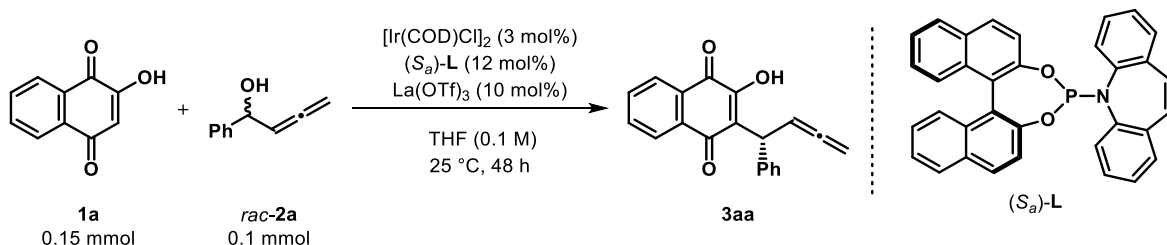

| Entry          | solvent                           | NMR yield (%)      | er <sup>c</sup> |
|----------------|-----------------------------------|--------------------|-----------------|
| 1              | (CH <sub>2</sub> Cl) <sub>2</sub> | <10                | n.d             |
| 2              | Toluene                           | <10                | n.d             |
| 3              | CH <sub>2</sub> Cl <sub>2</sub>   | <10                | n.d             |
| 4              | 2-Me THF                          | <10                | n.d             |
| 5 <sup>d</sup> | THF                               | 59                 | >99.9:0.1       |
| 6 <sup>e</sup> | THF                               | (82 <sup>b</sup> ) | >99.9:0.1       |

<sup>a</sup>Reactions were carried out on a 0.1 mmol scale. <sup>b</sup>Yields correspond to the isolated yield after chromatographic purification. <sup>c</sup>Enantiomeric ratio (er) as determined by HPLC analysis on a chiral stationary phase. <sup>d</sup>100 mg 4 Å MS was used as an additive. <sup>e</sup> Reaction was performed on a 0.2 mmol.

### E. General procedure for the preparation of racemic allenylation products (*rac*-**3**):

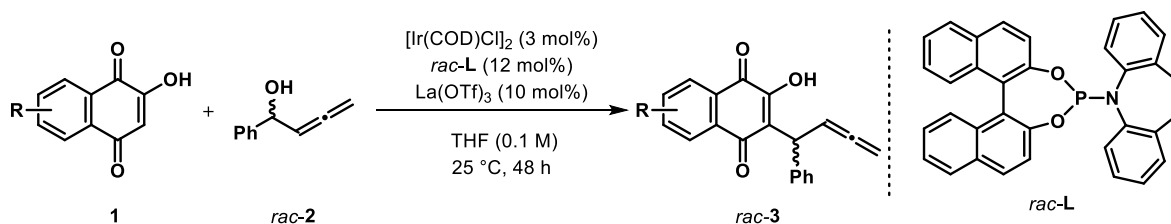

In an oven and vacuum-dried reaction tube,  $[\text{Ir}(\text{COD})\text{Cl}]_2$  (2.0 mg, 0.003 mmol, 3 mol%) and *rac*-**L** (5.0 mg, 0.012 mmol, 12 mol%) were taken in 0.5 mL of anh. THF under positive argon pressure and stirred vigorously at room temperature for 15 min to obtain a deep red solution. A solution of *rac*-**2** (0.1 mmol, 1.0 equiv) in 0.2 mL of THF was then added and the resulting pale yellow solution was stirred for 5 min at 25 °C. To this, 2-hydroxynaphthoquinone **1** (0.15 mmol, 1.5 equiv) and  $\text{La}(\text{OTf})_3$  (10 mol%, 5.9 mg) were added sequentially followed by the addition of another 0.3 mL of THF. The reaction tube was purged with argon, sealed with a glass stopper and the reaction mixture was allowed to stir at 25 °C for 48 h. The residue, without any further work-up, was purified by preparative TLC (Merck silica-gel 60 F<sub>254</sub> pre-coated plates of 0.25 mm thickness) to obtain *rac*-**3** samples for HPLC analysis.

## F. General procedure for Ir-catalyzed enantioselective allenylation of 2-hydroxynaphthoquinones:

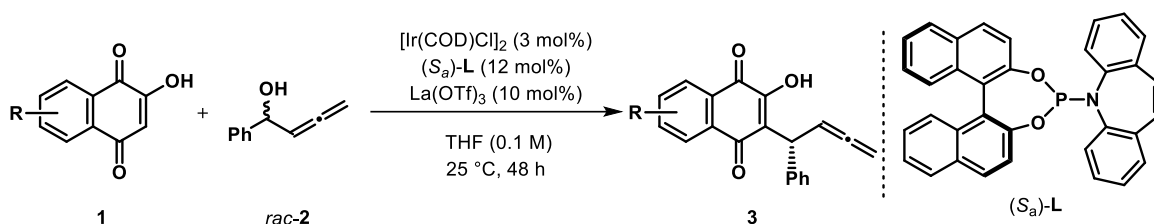

In an oven and vacuum-dried reaction tube,  $[\text{Ir}(\text{COD})\text{Cl}]_2$  (4.0 mg, 0.006 mmol, 3 mol%) and  $(S_a)\text{-L}$  (12.2 mg, 0.024 mmol, 12 mol%) were taken in 1 mL of anh. THF under positive argon pressure and stirred vigorously at room temperature for 15 min to obtain a deep red solution. A solution of *rac*-**2** (0.2 mmol, 1.0 equiv) in 0.4 mL of THF was then added and the resulting pale yellow solution was stirred for 5 min at room temperature. To this, 2-hydroxynaphthoquinone **1** (0.3 mmol, 1.5 equiv) and  $\text{La}(\text{OTf})_3$  (10 mol%, 11.8 mg) were added sequentially followed by the addition of another 0.6 mL of THF. The reaction tube was purged with argon, sealed with a glass stopper and the reaction mixture was allowed to stir at 25 °C until TLC (10% EtOAc in petroleum ether) revealed complete consumption of *rac*-**2**. The reaction mixture was filtered through a short pad of Celite<sup>®</sup>, washed with  $\text{CH}_2\text{Cl}_2$  and concentrated under reduced pressure to obtain a yellow sticky liquid. The residue was purified by silica-gel flash column chromatography (3-4% EtOAc in petroleum ether) to obtain  $\beta$ -allenyl 2-hydroxynaphthoquinone **3**.

## G. Procedure for the synthesis of *tert*-butyldimethylsilyl ether:

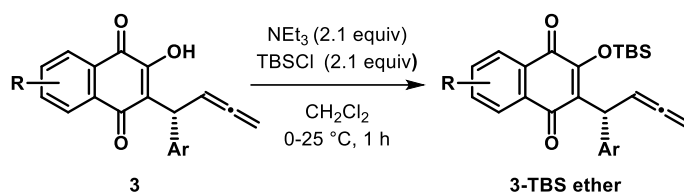

In an oven dried 10 mL round-bottom flask,  $\beta$ -allenyl 2-hydroxynaphthoquinone **3** (1.0 equiv) was dissolved in 0.8 mL of anh.  $\text{CH}_2\text{Cl}_2$  under argon atmosphere and cooled to 0 °C. To this solution,  $\text{NEt}_3$  (2.1 equiv) was added dropwise at 0 °C to obtain deep red solution followed by dropwise addition of a solution of *tert*-butyldimethylsilyl chloride (TBSCl) (2.1 equiv) in 0.2 mL of  $\text{CH}_2\text{Cl}_2$ . The resulting mixture was then allowed to attain ambient temperature and stirred at that temperature for 1 h. upon completion, the reaction mixture was diluted with 3 mL saturated solution of  $\text{NaHCO}_3$ , 1 mL of distilled  $\text{H}_2\text{O}$  and 1 mL of  $\text{CH}_2\text{Cl}_2$ . The organic phase was separated, and the aqueous phase was extracted with  $\text{CH}_2\text{Cl}_2$  (2  $\times$  2 mL). The combined organic phase was washed with brine (1 mL), dried over anh.  $\text{Na}_2\text{SO}_4$  and concentrated under reduced pressure. The residue was purified by silica gel flash

column chromatography (1-2% EtOAc in petroleum ether) to obtain **3-TBS** ether, usually in quantitative yield (>99% yield).

**Compound 3aa:** Reaction time 48 h, purified by silica-gel flash column chromatography (3-4% EtOAc

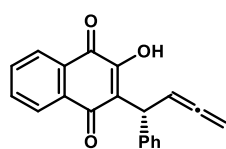

in petroleum ether); yellow sticky liquid (50 mg, 0.163 mmol, 82% yield); **FT-IR**

**(Thin film):** 3359 (br), 3061 (w), 3026 (w), 2924 (w), 1953 (w), 1664 (s), 1592 (m), 1372 (s), 1337 (m), 1279 (m), 1254 (m); **<sup>1</sup>H-NMR (400 MHz, CDCl<sub>3</sub>):**  $\delta$  8.11 (d,  $J$  = 7.8 Hz, 1H), 8.07 (d,  $J$  = 7.8 Hz, 1H), 7.78-7.74 (m, 1H), 7.70-7.66 (m, 1H), 7.50 (br, 1H), 7.45-7.43 (m, 2H), 7.31-7.27 (m, 2H), 7.22-7.18 (m, 1H), 6.01-5.95 (m, 1H), 5.29-5.26 (m, 1H), 4.79-4.71 (m, 2H); **<sup>13</sup>C-NMR (100 MHz, CDCl<sub>3</sub>):**  $\delta$  209.1, 183.8, 181.9, 153.0, 141.5, 135.3, 133.1, 132.9, 129.3, 128.4, 128.0, 127.3, 126.7, 126.3, 124.6, 90.0, 76.1, 40.7; **HRMS (ESI<sup>+</sup>):** Calcd. for C<sub>20</sub>H<sub>15</sub>O<sub>3</sub> ([M+H]<sup>+</sup>): 303.1021, Found: 303.1020; **Optical rotation:**  $[\alpha]_D^{22}$  +159.3 ( $c$  2.0, CHCl<sub>3</sub>) for an enantiomerically enriched sample with >99.9:0.1 er. The enantiomeric ratio was determined by HPLC analysis using Daicel Chiralpak IG column (90:10 *n*-Hexane/IPA, 1.0 mL/min, 20 °C, 241 nm,  $\tau_{\text{major}}$  = 11.9 min,  $\tau_{\text{minor}}$  = 13.2 min). See Supporting Information: Part B for HPLC chromatograms. The absolute stereochemistry of the product **3aa** was assigned in analogy with *trans*-**10** (see below).

**Compound 3ab:** Reaction time 48 h, purified by silica-gel flash column chromatography (3-4% EtOAc in petroleum ether); yellow sticky liquid (58.0 mg, 0.168 mmol, 84% yield);

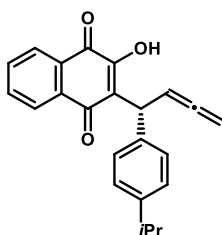

**FT-IR (Thin film):** 3362 (br), 2960 (m), 2925 (w), 2868 (w), 1953 (w), 1664 (s), 1594 (m), 1510 (w), 1460 (w), 1371 (s), 1279 (s), 1254 (s); **<sup>1</sup>H-NMR (400 MHz, CDCl<sub>3</sub>):**  $\delta$  8.12 (dd,  $J$  = 7.8, 1.1 Hz, 1H), 8.07 (dd,  $J$  = 7.6, 1.1 Hz, 1H), 7.72 (dt,  $J$  = 7.5, 1.3 Hz, 1H), 7.67 (dt,  $J$  = 7.5, 1.3 Hz, 1H), 7.50 (s, 1H), 7.37 (d,  $J$  = 8.2 Hz, 2H), 7.15 (d,  $J$  = 8.2 Hz, 2H), 6.03-5.97 (m, 1H), 5.26-5.24 (m, 1H), 4.77-4.70 (m, 2H), 2.86 (sept, 1H), 1.23 (d,  $J$  = 1.0 Hz, 3H), 1.21 (d,  $J$  = 1.0 Hz, 3H); **<sup>13</sup>C-NMR (100 MHz, CDCl<sub>3</sub>):**  $\delta$  209.0, 183.9, 182.0, 152.9, 147.3, 138.8, 135.3, 133.09, 133.05, 129.4, 128.0, 127.3, 126.5, 126.2, 124.9, 90.3, 75.9, 40.5, 33.8, 24.1; **HRMS (ESI<sup>+</sup>):** Calcd. for C<sub>23</sub>H<sub>20</sub>O<sub>3</sub>Na ([M+Na]<sup>+</sup>): 367.1310, Found: 367.1310; **Optical rotation:**  $[\alpha]_D^{22}$  +127.3 ( $c$  2.0, CHCl<sub>3</sub>) for an enantiomerically enriched sample with >99.9:0.1 er. The enantiomeric ratio was determined by HPLC analysis using Daicel Chiralpak AS-H column (90:10 *n*-Hexane/IPA, 0.5 mL/min, 20 °C, 260 nm,  $\tau_{\text{major}}$  = 17.2 min,  $\tau_{\text{minor}}$  = 19.2 min). See Supporting Information: Part B for HPLC chromatograms. The absolute stereochemistry of the product **3ab** was assigned in analogy with *trans*-**10** (see below).

**Compound 3ac:** Reaction time 48 h (for 1<sup>st</sup> step); Isolated and characterized as the TBS-ether; Purified by silica-gel flash column chromatography (1% EtOAc in petroleum ether); yellow oil (59.0 mg, 0.121 mmol, 61% yield (over 2 steps)); **FT-IR (Thin film):** 3427 (w), 2891 (w), 2932 (w), 1953 (w), 1672 (m), 1598 (m), 1518 (s), 1481 (w), 1343 (m), 1261 (m), 1212 (s); **<sup>1</sup>H-NMR (400 MHz, CDCl<sub>3</sub>):**  $\delta$  8.08-8.06 (m, 1H), 8.02-8.00 (m, 1H), 7.71-7.65 (m, 2H), 7.58-7.53 (m, 4H), 7.47 (d,  $J$  = 8.2 Hz, 2H), 7.42 (t,  $J$  = 7.3 Hz, 2H), 7.34-7.30 (m, 1H), 6.09-6.03 (m, 1H), 5.40-5.39 (m, 1H), 4.84-4.79 (m, 1H), 4.76-4.72 (m, 1H), 0.98 (s, 9H), 0.44 (s, 3H), 0.37 (s, 3H); **<sup>13</sup>C-NMR (100 MHz, CDCl<sub>3</sub>):**  $\delta$  209.5, 184.8, 181.9, 154.6, 141.2, 141.0, 139.3, 134.3, 133.1, 132.6, 131.3, 130.6, 128.8, 127.8, 127.2, 126.5, 126.2, 90.4, 75.8, 40.8, 26.1, 19.3, -3.3, -3.5; **HRMS (ESI<sup>+</sup>):** Calcd. for C<sub>32</sub>H<sub>33</sub>SiO<sub>3</sub> ([M+H]<sup>+</sup>): 493.2199, Found: 493.2198; **Optical rotation:**  $[\alpha]_D^{22} +31.8$  ( $c$  2.0, CHCl<sub>3</sub>) for an enantiomerically enriched sample with 99:1 er. The enantiomeric ratio was determined by HPLC analysis using Phenomenex Cellulose-2 column (99:1 *n*-Hexane/IPA, 0.5 mL/min, 20 °C, 263 nm,  $\tau_{\text{major}}$  = 10.3 min,  $\tau_{\text{minor}}$  = 11.5 min). See Supporting Information: Part B for HPLC chromatograms. The absolute stereochemistry of the product **3ac** was assigned in analogy with *trans*-**10** (see below).

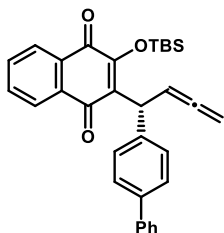

**Compound 3ad:** Reaction time 48 h, purified by silica-gel flash column chromatography (3-4% EtOAc in petroleum ether); yellow sticky liquid (38.0 mg, 0.103 mmol, 52% yield); **FT-IR (Thin film):** 3350 (br), 1954 (w), 1651 (s), 1460 (w), 1414 (w), 1367 (m), 1319 (s), 1258 (m); **<sup>1</sup>H-NMR (400 MHz, CDCl<sub>3</sub>):**  $\delta$  8.13-8.08 (m, 2H), 7.78 (dt,  $J$  = 7.5, 1.3 Hz, 1H), 7.70 (dt,  $J$  = 7.5, 1.3 Hz, 1H), 7.54 (m, 5H), 5.96-5.91 (m, 1H), 5.31-5.29 (m, 1H), 4.83-4.74 (m, 2H); **<sup>13</sup>C-NMR (100 MHz, CDCl<sub>3</sub>):**  $\delta$  209.1, 183.5, 181.6, 153.0, 145.4, 135.3, 133.2, 132.7, 129.3, 129.2, 128.8 (q,  $J$  = 32.6 Hz), 128.3, 127.2, 126.3, 125.2 (q,  $J$  = 3.7 Hz), 124.2 (q,  $J$  = 274.0 Hz), 89.3, 76.3, 40.5; **<sup>19</sup>F-NMR (376 MHz, CDCl<sub>3</sub>):**  $\delta$  -62.4; **HRMS (ESI<sup>+</sup>):** Calcd. for C<sub>21</sub>H<sub>14</sub>F<sub>3</sub>O<sub>3</sub> ([M+H]<sup>+</sup>): 371.0895, Found: 371.0894; **Optical rotation:**  $[\alpha]_D^{20} +72.7$  ( $c$  1.0, CHCl<sub>3</sub>) for an enantiomerically enriched sample with >99.9:0.1 er. The enantiomeric ratio was determined by HPLC analysis using Daicel Chiralpak AD-H column (90:10 *n*-Hexane/IPA, 1.0 mL/min, 20 °C, 269 nm,  $\tau_{\text{major}}$  = 10.5 min,  $\tau_{\text{minor}}$  = 12.1 min). See Supporting Information: Part B for HPLC chromatograms. The absolute stereochemistry of the product **3ad** was assigned in analogy with *trans*-**10** (see below).

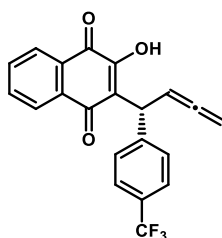

**Compound 3ae:** Reaction time 48 h, purified by silica-gel flash column chromatography (3-4% EtOAc in petroleum ether); yellow sticky liquid (53.0 mg, 0.157 mmol, 79% yield); **FT-IR (Thin film):** 3360 (br), 1954 (w), 1666 (s), 1592 (m), 1489 (m), 1373 (s), 1338 (s), 1279 (s), 1253 (s); **<sup>1</sup>H-NMR (400 MHz, CDCl<sub>3</sub>):**  $\delta$  8.05-7.99 (m, 2H), 7.69 (dt,  $J$  = 7.6, 1.3 Hz, 1H), 7.62 (dt,  $J$  = 7.6, 1.3 Hz, 1H), 7.45 (br, 1H), 7.30 (d,  $J$  = 8.4 Hz, 2H), 7.18 (d,  $J$  = 8.3 Hz, 2H), 5.86-5.81 (m, 1H), 5.16-5.14 (m, 1H), 4.73-4.65 (m, 2H); **<sup>13</sup>C-NMR (100 MHz, CDCl<sub>3</sub>):**  $\delta$  209.2, 183.7, 181.8, 153.0, 140.0, 135.4, 133.3, 132.9, 132.5, 129.5, 129.3, 128.5, 127.3, 126.4, 124.2, 89.8, 76.3, 40.2; **HRMS (ESI<sup>+</sup>):** Calcd.

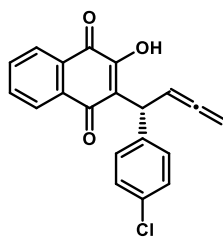

for  $C_{20}H_{14}ClO_3$  ( $[M+H]^+$ ): 337.0631, Found: 337.0630; **Optical rotation**:  $[\alpha]_D^{22} +145.4$  ( $c$  2.0,  $CHCl_3$ ) for an enantiomerically enriched sample with >99.9:0.1 er. The enantiomeric ratio was determined by HPLC analysis using Daicel Chiralpak IG column (90:10 *n*-Hexane/IPA, 0.5 mL/min, 20 °C, 241 nm,  $\tau_{major} = 22.4$  min,  $\tau_{minor} = 26.0$  min). See Supporting Information: Part B for HPLC chromatograms. The absolute stereochemistry of the product **3ae** was assigned in analogy with *trans*-**10** (see below).

**Compound 3af**: Reaction time 48 h, purified by silica-gel flash column chromatography (3-4% EtOAc in petroleum ether); yellow sticky liquid (60.0 mg, 0.157 mmol, 79% yield); **FT-IR**

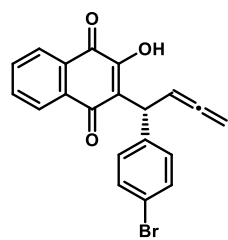

(**Thin film**): 3358 (br), 2924 (w), 2364 (w), 2332 (w), 1953 (w), 1665 (s), 1644 (s), 1590 (m), 1485 (m), 1371 (s), 1338 (s), 1279 (s), 1253 (s);  **$^1H$ -NMR (400 MHz,  $CDCl_3$ )**:  $\delta$  8.12-8.07 (m, 2H), 7.79-7.75 (m, 1H), 7.71-7.67 (m, 1H), 7.53 (br, 1H), 7.40 (d,  $J = 8.5$  Hz, 2H), 7.31 (d,  $J = 8.4$  Hz, 2H), 5.93-5.87 (m, 1H), 5.22-5.20 (m, 1H), 4.81-4.72 (m, 2H);  **$^{13}C$ -NMR (100 MHz,  $CDCl_3$ )**:  $\delta$  209.1, 183.7, 181.8,

153.0, 140.5, 135.4, 133.2, 132.8, 131.4, 129.8, 129.3, 127.2, 126.3, 124.0, 120.6, 89.7, 76.4, 40.2; **HRMS (ESI+)**: Calcd. for  $C_{20}H_{14}BrO_3$  ( $[M+H]^+$ ): 381.0126, Found: 381.0124; **Optical rotation**:  $[\alpha]_D^{22} +108.6$  ( $c$  2.0,  $CHCl_3$ ) for an enantiomerically enriched sample with >99.9:0.1 er. The enantiomeric ratio was determined by HPLC analysis using Daicel Chiralpak IG column (90:10 *n*-Hexane/IPA, 0.5 mL/min, 20 °C, 258 nm,  $\tau_{major} = 23.5$  min,  $\tau_{minor} = 27.0$  min). See Supporting Information: Part B for HPLC chromatograms. The absolute stereochemistry of the product **3af** was assigned in analogy with *trans*-**10** (see below).

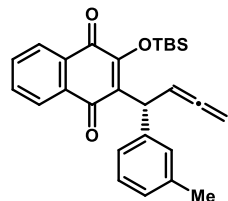

**Compound 3ag**: Reaction time 48 h (for 1<sup>st</sup> step); Isolated and characterized as the TBS-ether; Purified by silica-gel flash column chromatography (1% EtOAc in petroleum ether); yellow oil (72.0 mg, 0.167 mmol, 84% yield (over two steps));

**FT-IR (Thin film)**: 2934 (w), 2858 (w), 1953 (w), 1669 (m), 1508 (m), 1465 (w), 1343 (m), 1261 (s), 1211 (m);  **$^1H$ -NMR (400 MHz,  $CDCl_3$ )**:  $\delta$  8.07-8.04 (m, 1H), 8.00-7.98 (m, 1H), 7.70-7.64 (m, 2H), 7.20-7.17 (m, 3H), 7.00 (m, 1H), 6.04-5.99

(m, 1H), 5.32-5.29 (m, 1H), 4.80-4.76 (m, 1H), 4.73-4.69 (m, 1H), 2.33 (s, 3H), 0.97 (s, 9H), 0.42 (s, 3H), 0.34 (s, 3H);  **$^{13}C$ -NMR (100 MHz,  $CDCl_3$ )**:  $\delta$  209.4, 184.7, 181.9, 154.6, 141.8, 137.9, 134.2, 132.9, 132.6, 131.6, 130.6, 128.3, 128.1, 127.2, 126.5, 126.1, 124.5, 90.6, 75.7, 41.0, 26.1, 21.7, 19.3, -3.3, -3.5; **HRMS (ESI+)**: Calcd. for  $C_{27}H_{30}SiO_3Na$  ( $[M+Na]^+$ ): 453.1862, Found: 453.1865; **Optical rotation**:  $[\alpha]_D^{22} +97.3$  ( $c$  2.0,  $CHCl_3$ ) for an enantiomerically enriched sample with 99:1 er. The enantiomeric ratio was determined by HPLC analysis using Phenomenex Cellulose-2 column (99:1 *n*-Hexane/IPA, 0.5 mL/min, 20 °C, 247 nm,  $\tau_{major} = 9.4$  min,  $\tau_{minor} = 10.9$  min). See Supporting Information: Part B for HPLC chromatograms. The absolute stereochemistry of the product **3ag** was assigned in analogy with *trans*-**10** (see below).

**Compound 3ah:** Reaction time 48 h, purified by silica-gel flash column chromatography (3-4% EtOAc in petroleum ether); yellow sticky liquid (54.0 mg, 0.168 mmol, 84% yield); **FT-IR (Thin film):** 3361 (br), 2923 (w), 2359 (w), 1953 (w), 1667 (s), 1644 (s), 1587 (s), 1372 (s), 1338 (s), 1280 (s), 1245 (s);  **$^1\text{H-NMR}$  (400 MHz,  $\text{CDCl}_3$ ):**  $\delta$  8.11 (dd,  $J = 7.8, 0.9$  Hz, 1H), 8.08 (dd,  $J = 7.6, 0.9$  Hz, 1H), 7.79-7.75 (m, 1H), 7.71-7.67 (m, 1H), 7.54 (s, 1H), 7.25-7.15 (m, 3H), 6.92-6.87 (m, 1H), 5.95-5.89 (m, 1H), 5.26-5.24 (m, 1H), 4.81-4.75 (m, 2H);  **$^{13}\text{C-NMR}$  (100 MHz,  $\text{CDCl}_3$ ):**  $\delta$  209.2, 183.7, 181.8, 163.5 (d,  $J = 245.4$  Hz), 153.1, 144.1 (d,  $J = 6.8$  Hz), 135.4, 133.3, 132.9, 129.6 (d,  $J = 8.5$  Hz), 129.3, 127.3, 126.4, 124.0, 123.6 (d,  $J = 2.8$  Hz), 115.0 (d,  $J = 21.9$  Hz), 113.6 (d,  $J = 21.3$  Hz), 89.6, 76.3, 40.4;  **$^{19}\text{F-NMR}$  (376 MHz,  $\text{CDCl}_3$ ):**  $\delta$  -113.4; **HRMS (ESI+):** Calcd. for  $\text{C}_{20}\text{H}_{14}\text{FO}_3$  ( $[\text{M}+\text{H}]^+$ ): 321.0297, Found: 321.0297; **Optical rotation:**  $[\alpha]_{\text{D}}^{22} +192.2$  ( $c$  3.0,  $\text{CHCl}_3$ ) for an enantiomerically enriched sample with >99.9:0.1 er. The enantiomeric ratio was determined by HPLC analysis using Daicel Chiralpak ID column (90:10 *n*-Hexane/IPA, 1.0 mL/min, 20 °C, 252 nm,  $\tau_{\text{major}} = 11.7$  min,  $\tau_{\text{minor}} = 22.0$  min). See Supporting Information: Part B for HPLC chromatograms. The absolute stereochemistry of the product **3ah** was assigned in analogy with *trans*-**10** (see below).

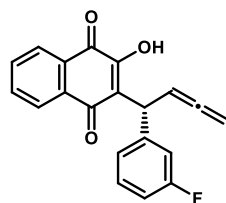

**Compound 3ai:** Reaction time 48 h, purified by silica-gel flash column chromatography (3-4% EtOAc in petroleum ether); yellow sticky liquid (46.0 mg, 0.136 mmol, 68% yield); **FT-IR (Thin film):** 3342 (br), 2925 (w), 1953 (w), 1650 (s), 1589 (m), 1470 (w), 1421 (w), 1367 (m), 1271 (m), 1220 (s);  **$^1\text{H-NMR}$  (400 MHz,  $\text{CDCl}_3$ ):**  $\delta$  8.05-8.00 (m, 2H), 7.69 (dt,  $J = 7.5, 1.0$  Hz, 1H), 7.62 (dt,  $J = 7.6, 1.0$  Hz, 1H), 7.46 (br, 1H), 7.34 (s, 1H), 7.25-7.23 (m, 1H), 7.18-7.09 (m, 2H), 5.85-5.81 (m, 1H), 5.16 (d,  $J = 8.6$  Hz, 1H), 4.75-4.65 (m, 2H);  **$^{13}\text{C-NMR}$  (100 MHz,  $\text{CDCl}_3$ ):**  $\delta$  209.2, 183.7, 181.8, 153.1, 143.6, 135.4, 134.3, 133.3, 132.9, 129.6, 129.3, 128.2, 127.3, 126.9, 126.4, 126.2, 123.9, 89.5, 76.4, 40.4; **HRMS (ESI+):** Calcd. for  $\text{C}_{20}\text{H}_{14}\text{ClO}_3$  ( $[\text{M}+\text{H}]^+$ ): 337.0631, Found: 337.0631; **Optical rotation:**  $[\alpha]_{\text{D}}^{22} -4.6$  ( $c$  2.0,  $\text{CHCl}_3$ ) for an enantiomerically enriched sample with >99.9:0.1 er. The enantiomeric ratio was determined by HPLC analysis using Daicel Chiralpak AD-H column (90:10 *n*-Hexane/EtOH, 0.5 mL/min, 20 °C, 242 nm,  $\tau_{\text{major}} = 21.9$  min,  $\tau_{\text{minor}} = 24.8$  min). See Supporting Information: Part B for HPLC chromatograms. The absolute stereochemistry of the product **3ai** was assigned in analogy with *trans*-**10** (see below).

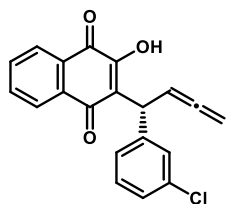

**Compound 3aj:** Reaction time 48 h, purified by silica-gel flash column chromatography (100% toluene); yellow solid (32.0 mg, 0.101 mmol, 51% yield); **m.p.** 146-147 °C; **FT-IR (Thin film):** 3352 (br), 2923 (w), 2857 (w), 1952 (w), 1654 (s), 1593 (m), 1459 (m), 1368 (s), 1263 (s);  **$^1\text{H-NMR}$  (400 MHz,  $\text{CDCl}_3$ ):**  $\delta$  8.13-8.06 (m, 2H), 7.78-7.74 (m, 1H), 7.70-7.66 (m, 1H), 7.62-7.60 (m, 1H), 7.52 (br, 1H), 7.21-7.12 (m, 3H), 5.86-5.81 (m, 1H), 5.36-5.34 (m, 1H), 4.74-4.72 (m, 2H), 2.35 (s, 3H);  **$^{13}\text{C-NMR}$  (100 MHz,  $\text{CDCl}_3$ ):**  $\delta$  208.6, 183.8, 181.9, 153.4, 139.5, 136.6, 135.3, 133.1, 133.0, 130.4, 129.3, 129.0, 127.3, 126.9, 126.3, 125.9, 123.9, 91.0, 76.4, 38.4, 20.0; **HRMS (ESI+):** Calcd. for

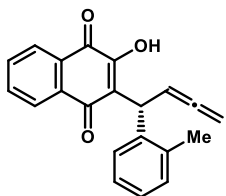

$C_{21}H_{17}O_3$  ( $[M+H]^+$ ): 317.1178, Found: 317.1179; **Optical rotation**:  $[\alpha]_D^{22} +133.1$  ( $c$  2.0,  $CHCl_3$ ) for an enantiomerically enriched sample with >99.9:0.1 er. The enantiomeric ratio was determined by HPLC analysis using Daicel Chiralpak AD-H column (90:10 *n*-Hexane/IPA, 1.0 mL/min, 20 °C, 274 nm,  $\tau_{major} = 11.7$  min,  $\tau_{minor} = 13.5$  min). See Supporting Information: Part B for HPLC chromatograms. The absolute stereochemistry of the product **3aj** was assigned in analogy with *trans*-**10** (see below).

**Compound 3ak:** Reaction time 48 h (for 1<sup>st</sup> step), purified by silica-gel flash column chromatography

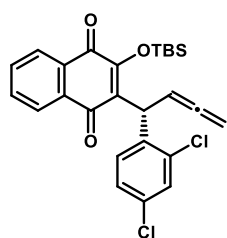

(2-3% EtOAc in petroleum ether); yellow liquid (40.0 mg, 0.083 mmol, 42% yield (over 2 steps)); **m.p.** 90-91 °C; **FT-IR (Thin film)**: 3074 (w), 2955 (w), 2862 (w), 2808 (w), 1957 (w), 1663 (s), 1593 (m), 1469 (m), 1364 (s), 1266 (s); **<sup>1</sup>H-NMR (400 MHz, CDCl<sub>3</sub>)**:  $\delta$  8.03-8.01 (m, 1H), 7.92-7.90 (m, 1H), 7.75 (d,  $J = 8.2$  Hz, 1H), 7.67-7.64 (m, 2H), 7.30-7.26 (m, 2H), 5.77-5.72 (m, 1H), 5.32-5.30 (m, 1H), 4.74-4.73 (m, 2H), 1.02 (s, 9H), 0.41 (s, 3H), 0.34 (s, 3H); **<sup>13</sup>C-NMR (100 MHz, CDCl<sub>3</sub>)**:  $\delta$  209.0, 184.7, 181.6, 155.1, 137.9, 134.33, 134.30, 133.0, 132.95, 132.5, 130.5, 129.0, 128.2,

126.7, 126.4, 126.2, 90.3, 76.8, 39.3, 26.2, 19.5, -3.2, -3.5; **HRMS (ESI+)**: Calcd. for  $C_{26}H_{27}Cl_2O_3Si$  ( $[M+H]^+$ ): 485.1107, Found: 485.1104; **Optical rotation**:  $[\alpha]_D^{20} +53.5$  ( $c$  1.0,  $CHCl_3$ ) for an enantiomerically enriched sample with 99:1 er. The enantiomeric ratio was determined by HPLC analysis using Phenomenex Cellulose-2 column (99:1 *n*-Hexane/IPA, 0.5 mL/min, 20 °C, 263 nm,  $\tau_{major} = 10.3$  min,  $\tau_{minor} = 11.5$  min). See Supporting Information: Part B for HPLC chromatograms. The absolute stereochemistry of the product **3ak** was assigned in analogy with *trans*-**10** (see below).

**Compound 3al:** Reaction time 48 h (for 1<sup>st</sup> step), purified by silica-gel flash column chromatography

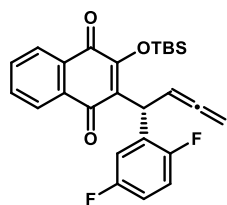

(2-3% EtOAc in petroleum ether); yellow sticky liquid (43.0 mg, 0.095 mmol, 47% yield (over 2 steps)); **FT-IR (Thin film)**: 2931 (w), 2858 (w), 1955 (w), 1668 (s), 1598 (m), 1422 (w), 1353 (s), 1268 (s); **<sup>1</sup>H-NMR (400 MHz, CDCl<sub>3</sub>)**:  $\delta$  8.03 (d,  $J = 6.9$  Hz, 1H), 7.95 (d,  $J = 7.4$  Hz, 1H), 7.69-7.63 (m, 2H), 7.43-7.39 (m, 1H), 6.87-6.84 (m, 2H), 5.87-5.81 (m, 1H), 5.41 (d,  $J = 8.6$  Hz, 1H), 4.80-4.72 (m, 2H),

0.99 (s, 9H), 0.39 (s, 3H), 0.37 (s, 3H); **<sup>13</sup>C-NMR (100 MHz, CDCl<sub>3</sub>)**:  $\delta$  209.3, 184.6, 181.7, 159.87, 159.85, 158.04, 157.5, 155.63, 155.61, 154.6, 134.3, 133.1, 132.5, 130.83, 130.75, 130.7, 130.6, 130.5, 129.0, 126.4, 126.2, 117.39, 117.35, 117.14, 117.1, 116.0, 115.9, 115.74, 115.66, 114.6, 114.5, 114.3, 114.2, 89.3, 76.6, 35.8, 26.1, 19.4, -3.4, -3.5; **<sup>19</sup>F-NMR (376 MHz, CDCl<sub>3</sub>)**:  $\delta$  -119.0 (d,  $J = 18.0$  Hz), -122.0 (d,  $J = 17.9$  Hz); **HRMS (ESI+)**: Calcd. for  $C_{26}H_{27}F_2O_3Si$  ( $[M+H]^+$ ): 453.1698, Found: 453.1694; **Optical rotation**:  $[\alpha]_D^{20} +30.9$  ( $c$  1.0,  $CHCl_3$ ) for an enantiomerically enriched sample with >99.9:0.1 er. The enantiomeric ratio was determined by HPLC analysis using Daicel Chiralpak AD-H column (85:15 *n*-Hexane/IPA, 1.0 mL/min, 20 °C, 290 nm,  $\tau_{minor} = 10.5$  min,  $\tau_{major} = 12.1$  min). See Supporting Information: Part B for HPLC chromatograms. The absolute stereochemistry of the product **3al** was assigned in analogy with *trans*-**10** (see below).

**Compound 3am:** Reaction time 48 h, purified by silica-gel flash column chromatography (3% EtOAc in petroleum ether); yellow sticky liquid (53.0 mg, 0.142 mmol, 71% yield); **FT-IR (Thin film):** 3344 (br), 3071 (w), 3021 (w), 2924 (w), 2856 (w), 1954 (w), 1654 (s), 1591 (m), 1467 (m), 1367 (s), 1271 (s);  **$^1\text{H-NMR}$  (400 MHz,  $\text{CDCl}_3$ ):**  $\delta$  8.05-8.00 (m, 2H), 7.70 (dt,  $J = 7.5, 1.1$  Hz, 1H), 7.63 (dt,  $J = 7.5, 1.0$  Hz, 1H), 7.50 (br, 1H), 7.44-7.43 (m, 1H), 7.27 (d,  $J = 8.3$  Hz, 1H), 7.20-7.18 (m, 1H), 5.82-5.76 (m, 1H), 5.12 (d,  $J = 8.6$  Hz, 1H), 4.76-4.67 (m, 2H);  **$^{13}\text{C-NMR}$  (100 MHz,  $\text{CDCl}_3$ ):**  $\delta$  209.2, 183.6, 181.7, 153.1, 141.8, 135.5, 133.4, 132.8, 132.4, 130.7, 130.3, 130.0, 129.3, 127.5, 127.3, 126.4, 123.5, 89.3, 76.6, 39.9; **HRMS (ESI $^+$ ):** Calcd. for  $\text{C}_{20}\text{H}_{13}\text{Cl}_2\text{O}_3$  ( $[\text{M}+\text{H}]^+$ ): 371.0242, Found: 371.0241; **Optical rotation:**  $[\alpha]_{\text{D}}^{22} -2.74$  ( $c$  2.0,  $\text{CHCl}_3$ ) for an enantiomerically enriched sample with >99.9:0.1 er. The enantiomeric ratio was determined by HPLC analysis using Daicel Chiralpak AD-H column (90:10 *n*-Hexane/EtOH, 0.5 mL/min, 20 °C, 299 nm,  $\tau_{\text{major}} = 23.4$  min,  $\tau_{\text{minor}} = 27.7$  min). See Supporting Information: Part B for HPLC chromatograms. The absolute stereochemistry of the product **3am** was assigned in analogy with *trans*-**10** (see below).

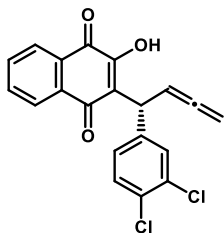

**Compound 3an:** Reaction time 48 h (for 1<sup>st</sup> step), purified by silica-gel flash column chromatography (1-2% EtOAc in petroleum ether); yellow sticky liquid (37.0 mg, 0.08 mmol, 40% yield (over 2 steps)); **FT-IR (Thin film):** 2923 (w), 2857 (w), 1955 (w), 1715 (s), 1653 (s), 1593 (m), 1488 (m), 1364 (s), 1244 (s);  **$^1\text{H-NMR}$  (400 MHz,  $\text{CDCl}_3$ ):**  $\delta$  8.05-8.03 (m, 1H), 7.99-7.97 (m, 1H), 7.70-7.63 (m, 2H), 6.88 (s, 1H), 6.83-6.81 (m, 1H), 6.72 (d,  $J = 8.2$  Hz, 1H), 5.97-5.90 (m, 3H), 5.23 (d,  $J = 9.0$  Hz, 1H), 4.79-4.75 (m, 1H), 4.72-4.67 (m, 1H), 0.96 (s, 9H), 0.40 (s, 3H), 0.34 (s, 3H);  **$^{13}\text{C-NMR}$  (100 MHz,  $\text{CDCl}_3$ ):**  $\delta$  209.4, 184.8, 181.9, 154.5, 147.7, 146.1, 135.9, 134.3, 133.1, 132.6, 131.4, 130.6, 126.5, 126.2, 120.4, 108.22, 108.16, 101.0, 90.7, 75.8, 40.8, 26.1, 19.3, -3.3, -3.5; **HRMS (ESI $^+$ ):** Calcd. for  $\text{C}_{21}\text{H}_{14}\text{O}_5\text{Na}$  ( $[\text{M}+\text{Na}]^+$ ): 369.0739, Found: 369.0739 [Note: HRMS data matched with corresponding unprotected product]; **Optical rotation:**  $[\alpha]_{\text{D}}^{20} +30.0$  ( $c$  1.0,  $\text{CHCl}_3$ ) for an enantiomerically enriched sample with 91:9 er. The enantiomeric ratio was determined by HPLC analysis using Daicel Chiralpak IG column (99:1 *n*-Hexane/EtOH, 1.0 mL/min, 20 °C, 254 nm,  $\tau_{\text{major}} = 8.5$  min,  $\tau_{\text{minor}} = 10.2$  min). See Supporting Information: Part B for HPLC chromatograms. The absolute stereochemistry of the product **3an** was assigned in analogy with *trans*-**10** (see below).

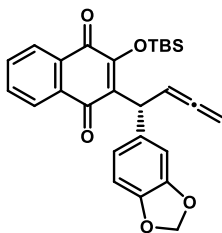

**Compound 3ao:** Reaction time 48 h, purified by silica-gel flash column chromatography (3-4% EtOAc in petroleum ether); yellow sticky liquid (56.0 mg, 0.159 mmol, 79% yield); **FT-IR (Thin film):** 3340 (br), 3055 (w), 3018 (w), 2925 (w), 2854 (w), 1953 (w), 1664 (s), 1647 (s), 1594 (m), 1460 (m), 1365 (s), 1276 (s);  **$^1\text{H-NMR}$  (400 MHz,  $\text{CDCl}_3$ ):**  $\delta$  8.12 (d,  $J = 7.4$  Hz, 1H), 8.08 (d,  $J = 7.6$  Hz, 1H), 7.89 (s, 1H), 7.81-7.74 (m, 4H), 7.70-7.66 (m, 1H), 7.57-7.54 (m, 2H), 7.46-7.39 (m, 2H), 6.11-6.06 (m, 1H), 5.45 (d,  $J = 8.7$  Hz, 1H), 4.84-4.75 (m, 2H);  **$^{13}\text{C-NMR}$  (100 MHz,  $\text{CDCl}_3$ ):**  $\delta$  209.2, 183.9, 181.9, 153.1, 138.9, 135.3, 133.5, 133.2, 132.9, 132.4, 129.3, 128.04, 128.00, 127.7, 127.3,

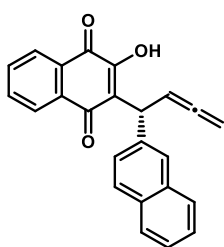

126.6, 126.4, 126.3 126.1, 125.7, 124.5, 90.0, 76.2, 40.8; **HRMS (ESI+)**: Calcd. for  $C_{24}H_{17}O_3$  ( $[M+H]^+$ ): 353.1178, Found: 353.1176; **Optical rotation**:  $[\alpha]_D^{22} +26.4$  ( $c$  1.0,  $CHCl_3$ ) for an enantiomerically enriched sample with >99.9:0.1 er. The enantiomeric ratio was determined by HPLC analysis using Daicel Chiralpak AD-H column (90:10 *n*-Hexane/EtOH, 1.0 mL/min, 20 °C, 226 nm,  $\tau_{major} = 21.6$  min,  $\tau_{minor} = 25.8$  min.). See Supporting Information: Part B for HPLC chromatograms. The absolute stereochemistry of the product **3ao** was assigned in analogy with *trans*-**10** (see below).

**Compound 3ap**: Reaction time 48 h (for 1<sup>st</sup> step), purified by silica-gel flash column chromatography (3-4% EtOAc in petroleum ether); pale yellow sticky liquid ((64.0 mg, 0.150 mmol, 75% yield) (1<sup>st</sup> step), (65 mg, 0.12 mmol, >99% yield) (for 2<sup>nd</sup> step); [*Note*: 2<sup>nd</sup> step was performed on 0.12 mmol scale]; **FT-IR (Thin film)**: 2935 (w), 2857 (w), 1952 (w), 1667 (s), 1590 (s), 1463 (m), 1344 (m), 1261 (s), 1212 (s); **<sup>1</sup>H-NMR (400 MHz, CDCl<sub>3</sub>)**:  $\delta$  8.07-8.05 (m, 1H), 7.97-7.94 (m, 1H), 7.93 (br, 1H), 7.81 (s, 1H), 7.68-7.65 (m, 4H), 7.51-7.47 (m, 2H), 6.10-6.04 (m, 1H), 5.45 (d,  $J = 8.8$  Hz, 1H), 4.85-4.81 (m, 1H), 4.78-4.73 (m, 1H), 0.93 (s, 9H), 0.42 (s, 3H), 0.36 (s, 3H); **<sup>13</sup>C-NMR (100 MHz, CDCl<sub>3</sub>)**:  $\delta$  209.6, 184.7, 181.9, 154.8, 140.0, 134.4, 133.4, 133.1, 132.5, 132.0, 131.0, 130.6, 129.7, 129.4, 127.1, 126.5, 126.2, 125.8, 119.4, 90.3, 76.0, 41.2, 26.1, 19.3, -3.3, -3.5; **HRMS (ESI+)**: Calcd. for  $C_{30}H_{29}BrO_3SiNa$  ( $[M+Na]^+$ ): 567.0967, Found: 567.0964; **Optical rotation**:  $[\alpha]_D^{20} +4.6$  ( $c$  2.0,  $CHCl_3$ ) for an enantiomerically enriched sample with 99:1 er. [*Note*: The enantiomeric ratio was determined for unprotected alcohol by HPLC analysis using Daicel Chiralpak AD-H column (90:10 *n*-Hexane/IPA, 1.0 mL/min, 20 °C), 269 nm,  $\tau_{minor} = 24.3$  min,  $\tau_{major} = 26.9$  min)]. See Supporting Information: Part B for HPLC chromatograms. The absolute stereochemistry of the product **3ap** was assigned in analogy with *trans*-**10** (see below).

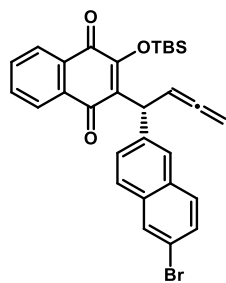

**Compound 3aq**: Reaction time 48 h, purified by silica-gel flash column chromatography (toluene); yellow solid (46.0 mg, 0.130 mmol, 65% yield); **m.p.** 119-120 °C; **FT-IR (Thin film)**: 3350 (br), 3051 (w), 2923 (w), 1953 (w), 1654 (s), 1592 (s), 1368 (s), 1268 (m); **<sup>1</sup>H-NMR (400 MHz, CDCl<sub>3</sub>)**:  $\delta$  8.16-8.11 (m, 2H), 8.04-8.03 (m, 1H), 7.88-7.83 (m, 2H), 7.77-7.74 (m, 2H), 7.67-7.64 (m, 1H), 7.51-7.43 (m, 4H), 5.97-5.94 (m, 2H), 4.80-4.77 (m, 2H); **<sup>13</sup>C-NMR (100 MHz, CDCl<sub>3</sub>)**:  $\delta$  208.7, 183.8, 181.7, 153.6, 136.8, 135.3, 133.9, 133.1, 132.9, 131.9, 129.3, 129.0, 127.7, 127.4, 127.1, 126.34, 126.26, 125.5, 125.3, 124.0, 123.6, 90.8, 76.8, 37.4; **HRMS (ESI+)**: Calcd. for  $C_{24}H_{17}O_3$  ( $[M+H]^+$ ): 353.1178, Found: 353.1178; **Optical rotation**:  $[\alpha]_D^{22} +3.0$  ( $c$  2.0,  $CHCl_3$ ) for an enantiomerically enriched sample with 98:2 er. The enantiomeric ratio was determined by HPLC analysis using Daicel Chiralpak AD-H column (90:10 *n*-Hexane/IPA, 1.0 mL/min, 20 °C, 230 nm,  $\tau_{minor} = 21.5$  min,  $\tau_{major} = 28.7$  min). See Supporting Information: Part B for HPLC chromatograms. The absolute stereochemistry of the product **3aq** was assigned in analogy with *trans*-**10** (see below).

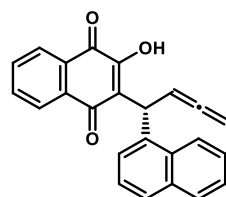

**Compound 3ar:** Reaction time 48 h (for 1<sup>st</sup> step), purified by silica-gel flash column chromatography (1-2% EtOAc in petroleum ether); pale yellow sticky liquid (30.0 mg, 0.07 mmol, 35% yield (over 2 steps)); **FT-IR (Thin film):** 2924 (w), 2855 (w), 1955 (w), 1709 (s), 1659 (s), 1589 (m), 1459 (m), 1365 (s), 1268 (s); **<sup>1</sup>H-NMR (400 MHz, CDCl<sub>3</sub>):**  $\delta$  8.05-8.02 (m, 2H), 7.72-7.66 (m, 2H), 7.12 (dd,  $J$  = 5.1, 1.1 Hz, 1H), 6.95-6.90 (m, 2H), 6.06-6.02 (m, 1H), 5.47 (dd,  $J$  = 9.0, 1.3 Hz, 1H), 4.81-4.79 (m, 1H), 4.75-4.73 (m, 1H), 0.97 (s, 9H), 0.39 (s, 3H), 0.34 (s, 3H); **<sup>13</sup>C-NMR (100 MHz, CDCl<sub>3</sub>):**  $\delta$  209.1, 184.6, 181.9, 145.8, 134.4, 133.1, 132.6, 130.6, 130.5, 126.8, 126.6, 126.2, 124.5, 123.9, 91.4, 76.3, 37.5, 26.1, 19.3, -3.4, -3.5; **HRMS (ESI+):** Calcd. for C<sub>18</sub>H<sub>12</sub>O<sub>3</sub>SNa ([M+Na]<sup>+</sup>): 331.0405, Found: 331.0409 [*Note*: HRMS data matched with corresponding unprotected product]; **Optical rotation:**  $[\alpha]_D^{20} +36.4$  ( $c$  1.0, CHCl<sub>3</sub>) for an enantiomerically enriched sample with 94:6 er. The enantiomeric ratio was determined by HPLC analysis using Phenomenex Cellulose-2 column (99:1 *n*-Hexane/IPA, 0.5 mL/min, 20 °C, 254 nm,  $\tau_{\text{major}}$  = 10.7 min,  $\tau_{\text{minor}}$  = 14.5 min). See Supporting Information: Part B for HPLC chromatograms. The absolute stereochemistry of the product **3ar** was assigned in analogy with *trans*-**10** (see below).

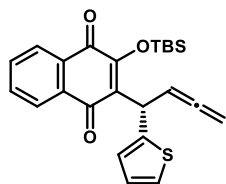

**Compound 3ba:** Reaction time 48 h, purified by silica-gel flash column chromatography (8-9% EtOAc in petroleum ether); yellow sticky liquid (41.0 mg, 0.123 mmol, 62% yield); **FT-IR (Thin film):** 3432 (br), 2926 (w), 2848 (w), 1952 (w), 1647 (s), 1583 (m), 1466 (m), 1375 (m), 1277 (s); **<sup>1</sup>H-NMR (400 MHz, CDCl<sub>3</sub>):**  $\delta$  7.75 (dd,  $J$  = 7.5, 0.9 Hz, 1H), 7.64-7.60 (m, 1H), 7.45 (d,  $J$  = 7.4 Hz, 2H), 7.34 (d,  $J$  = 8.5 Hz, 1H), 7.29-7.27 (m, 2H), 7.26-7.25 (m, 1H), 7.20-7.16 (m, 1H), 6.01-5.96 (m, 1H), 5.28 (d,  $J$  = 8.7 Hz, 1H), 4.77-4.69 (m, 2H), 4.00 (s, 3H); **<sup>13</sup>C-NMR (100 MHz, CDCl<sub>3</sub>):**  $\delta$  209.1, 183.5, 182.2, 160.0, 151.2, 141.7, 134.2, 131.5, 128.3, 128.1, 126.5, 126.2, 119.80, 119.77, 119.1, 90.1, 75.9, 56.7, 40.7; **HRMS (ESI+):** Calcd. for C<sub>21</sub>H<sub>17</sub>O<sub>4</sub> ([M+H]<sup>+</sup>): 333.1127, Found: 333.1127; **Optical rotation:**  $[\alpha]_D^{22} +100.9$  ( $c$  1.0, CHCl<sub>3</sub>) for an enantiomerically enriched sample with 99:1 er. The enantiomeric ratio was determined by HPLC analysis using Daicel Chiralpak AD-H column (90:10 *n*-Hexane/IPA, 1.0 mL/min, 20 °C, 343 nm,  $\tau_{\text{minor}}$  = 18.7 min,  $\tau_{\text{major}}$  = 28.8 min). See Supporting Information: Part B for HPLC chromatograms. The absolute stereochemistry of the product **3ba** was assigned in analogy with *trans*-**10** (see below).

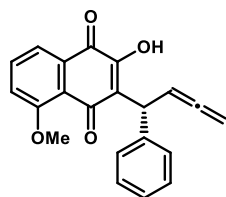

**Compound 3ca:** Reaction time 48 h, purified by silica-gel flash column chromatography (3-4% EtOAc in petroleum ether); yellow sticky liquid (56.0 mg, 0.166 mmol, 83% yield); **FT-IR (Thin film):** 3356 (br), 3069 (w), 2925 (w), 1953 (w), 1657 (s), 1585 (m), 1494 (w), 1364 (m), 1321 (m), 1259 (s); **<sup>1</sup>H-NMR (400 MHz, CDCl<sub>3</sub>):**  $\delta$  8.07 (d,  $J$  = 2.1 Hz, 1H), 8.01 (d,  $J$  = 8.3 Hz, 1H), 7.64 (dd,  $J$  = 8.3, 2.1 Hz, 1H), 7.54 (s, 1H), 7.42 (d,  $J$  = 7.7 Hz, 2H), 7.32-7.28 (m, 2H), 7.23-7.19 (m, 1H), 5.99-5.94 (m, 1H), 5.25 (d,  $J$  = 8.6 HZ, 1H), 4.80-4.72 (m, 2H); **<sup>13</sup>C-NMR (100 MHz, CDCl<sub>3</sub>):**  $\delta$  209.1, 182.7, 181.0, 153.1, 142.5, 141.2, 134.2, 133.2, 128.5, 128.0, 127.9, 127.6, 126.8, 124.8, 89.9, 76.2,

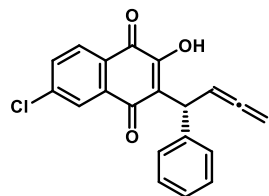

40.8; **HRMS (ESI+)**: Calcd. for  $C_{20}H_{14}ClO_3$  ( $[M+H]^+$ ): 337.0631, Found: 337.0633; **Optical rotation**:  $[\alpha]_D^{22} +4.8$  ( $c$  2.0,  $CHCl_3$ ) for an enantiomerically enriched sample with >99.9:0.1 er. The enantiomeric ratio was determined by HPLC analysis using Daicel Chiralpak IK column (90:10 *n*-Hexane/IPA, 1.0 mL/min, 20 °C, 380 nm,  $\tau_{major}$  = 7.3 min,  $\tau_{minor}$  = 9.8 min.). See Supporting Information: Part B for HPLC chromatograms. The absolute stereochemistry of the product **3ca** was assigned in analogy with *trans*-**10** (see below).

**Compound 3da**: Reaction time 48 h, purified by silica-gel flash column chromatography (4-5% EtOAc in petroleum ether); yellow solid (45.0 mg, 0.135 mmol, 70% yield); **m.p.** 66-67 °C; **FT-IR (Thin film)**: 3360 (br), 3021 (w), 2930 (w), 2845 (w), 1953 (w), 1651 (s), 1594 (s), 1492 (w), 1447 (m), 1358 (s), 1279 (s); **<sup>1</sup>H-NMR (400 MHz, CDCl<sub>3</sub>)**:  $\delta$  8.07 (d,  $J$  = 8.6 Hz, 1H), 7.51 ( $J$  = 2.6 Hz, 1H), 7.48-7.46 (m, 3H), 7.34-7.30 (m, 2H), 7.24-7.21 (m, 2H), 6.04-5.98 (m, 1H), 5.30 (d,  $J$  = 8.8 Hz, 1H), 4.83-4.74 (m, 2H), 3.95 (s, 3H); **<sup>13</sup>C-NMR (100 MHz, CDCl<sub>3</sub>)**:  $\delta$  209.1, 183.3, 182.1, 163.5, 152.8, 141.6, 131.1, 129.5, 128.4, 128.0, 126.6, 126.3, 124.4, 121.2, 109.9, 90.1, 76.0, 56.1, 40.6; **HRMS (ESI+)**: Calcd. for  $C_{21}H_{17}O_4$  ( $[M+H]^+$ ): 333.1127, Found: 333.1125; **Optical rotation**:  $[\alpha]_D^{22} +63.9$  ( $c$  2.0,  $CHCl_3$ ) for an enantiomerically enriched sample with >99.5:0.5 er. The enantiomeric ratio was determined by HPLC analysis using Daicel Chiralpak IK column (90:10 *n*-Hexane/IPA, 1.0 mL/min, 20 °C), 327 nm,  $\tau_{minor}$  = 20.7 min,  $\tau_{major}$  = 22.1 min). See Supporting Information: Part B for HPLC chromatograms. The absolute stereochemistry of the product **3da** was assigned in analogy with *trans*-**10** (see below).

**Compound 3ea**: Reaction time 48 h, purified by silica-gel flash column chromatography (3-4% EtOAc in petroleum ether); yellow solid (51.0 mg, 0.16 mmol, 80% yield); **m.p.** 76-77 °C; **FT-IR (Thin film)**: 3356 (br), 3027 (w), 2926 (w), 2857 (w), 1954 (w), 1653 (s), 1601 (m), 1492 (w), 1441 (m), 1358 (s), 1263 (m); **<sup>1</sup>H-NMR (400 MHz, CDCl<sub>3</sub>)**:  $\delta$  7.99 (d,  $J$  = 7.6 Hz, 1H), 7.86-7.85 (m, 1H), 7.56-7.51 (m, 2H), 7.45-7.44 (m, 2H), 7.31-7.28 (m, 2H), 7.22-7.18 (m, 1H), 6.02-5.96 (m, 1H), 5.27 (d,  $J$  = 9.0 Hz, 1H), 4.80-4.71 (m, 2H), 2.47 (s, 3H); **<sup>13</sup>C-NMR (100 MHz, CDCl<sub>3</sub>)**:  $\delta$  209.1, 183.8, 182.2, 152.9, 144.1, 141.6, 135.9, 130.7, 129.2, 128.4, 128.0, 127.4, 126.7, 126.6, 124.4, 90.1, 76.0, 40.7, 21.7; **HRMS (ESI+)**: Calcd. for  $C_{21}H_{17}O_3$  ( $[M+H]^+$ ): 317.1178, Found: 317.1177; **Optical rotation**:  $[\alpha]_D^{22} +63.7$  ( $c$  2.0,  $CHCl_3$ ) for an enantiomerically enriched sample with >99.5:0.5 er. The enantiomeric ratio was determined by HPLC analysis using Daicel Chiralpak IK column (90:10 *n*-Hexane/IPA, 1.0 mL/min, 20 °C, 380 nm,  $\tau_{major}$  = 7.9 min,  $\tau_{minor}$  = 10.0 min). See Supporting Information: Part B for HPLC chromatograms. The absolute stereochemistry of the product **3ea** was assigned in analogy with *trans*-**10** (see below).

**Compound 3fa:** Reaction time 48 h, purified by silica-gel flash column chromatography (3-4% EtOAc

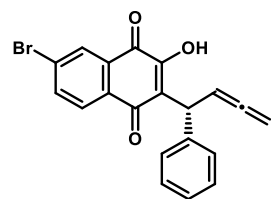

in petroleum ether); yellow solid (60.0 mg, 0.157 mmol, 78% yield); **m.p.**

111-112°C; **FT-IR (Thin film):** 3366 (br), 3068 (w), 3028 (w), 2925 (w), 1953

(w), 1655 (s), 1583 (m), 1492 (w), 1417 (w), 1354 (s), 1252 (s); **<sup>1</sup>H-NMR (400**

**MHz, CDCl<sub>3</sub>):**  $\delta$  8.11 (d,  $J$  = 1.4 Hz, 1H), 7.90 (d,  $J$  = 8.3 Hz, 1H), 7.80 (dd,  $J$

= 8.3, 1.4 Hz, 1H), 7.36-7.34 (m, 3H), 7.24-7.18 (m, 2H), 7.15-7.11 (m, 1H),

5.91-5.86 (m, 1H), 5.19 (d,  $J$  = 8.9 Hz, 1H), 4.73-4.64 (m, 2H); **<sup>13</sup>C-NMR (100 MHz, CDCl<sub>3</sub>):**  $\delta$

209.1, 183.1, 181.0, 152.8, 141.2, 138.1, 131.5, 130.5, 129.1, 129.0, 128.5, 128.4, 128.0, 126.8, 125.1,

89.9, 76.2, 40.7; **HRMS (ESI+):** Calcd. for C<sub>20</sub>H<sub>14</sub>BrO<sub>3</sub> ([M+H]<sup>+</sup>): 381.0126, Found: 381.0124;

**Optical rotation:**  $[\alpha]_D^{22}$  +26.3 ( $c$  2.0, CHCl<sub>3</sub>) for an enantiomerically enriched sample with >99.9:0.1

er. The enantiomeric ratio was determined by HPLC analysis using Daicel Chiralpak IK column (90:10

*n*-Hexane/IPA, 1.0 mL/min, 20 °C, 380 nm,  $\tau_{\text{major}}$  = 7.5 min,  $\tau_{\text{minor}}$  = 9.0 min). See Supporting

Information: Part B for HPLC chromatograms. The absolute stereochemistry of the product **3fa** was

assigned in analogy with *trans*-**10** (see below).

## H. Unsuccessful substrates:

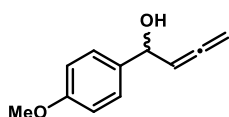

<5% Yield

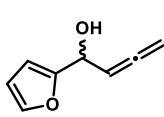

<5% Yield

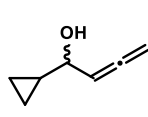

<5% Yield

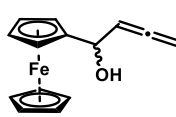

<5% Yield

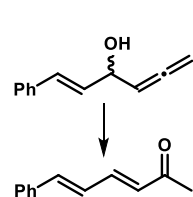

58% yield  
(with <5% desired product)

### Unsuccessful electrophiles

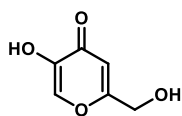

<5% Yield

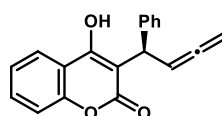

34% Yield  
98.5:1.5 er

### Unsuccessful nucleophiles

# I. Catalytic enantioselective $\beta$ -allenylation of 2-hydroxynaphthoquinone **1a** on a 2.0 mmol scale:

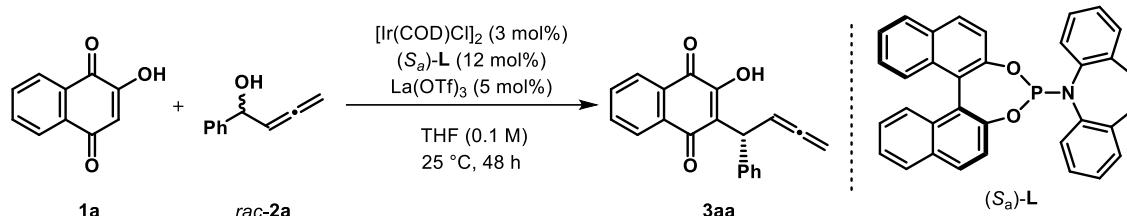

In an oven and vacuum-dried round-bottom flask,  $[\text{Ir}(\text{COD})\text{Cl}]_2$  (40.3 mg, 0.06 mmol, 3 mol%) and  $(S_a)\text{-L}$  (121.8 mg, 0.24 mmol, 12 mol%) were taken in 15 mL of anh. THF under positive argon pressure and stirred vigorously at room temperature for 15 min to obtain a deep red solution. A solution of *rac*-**2a** (292.4 mg, 2 mmol, 1.0 equiv) in 4 mL of THF was then added and the resulting pale-yellow solution was stirred for 5 min at room temperature. To this solution, **1a** (522.5 mg, 3 mmol, 1.5 equiv) and  $\text{La}(\text{OTf})_3$  (58.6 mg, 0.1 mmol, 5 mol%) were added sequentially followed by the addition of another 1 mL of THF. The reaction flask was purged with argon, sealed with a glass stopper and the mixture was allowed to stir at 25 °C until TLC (10% EtOAc in petroleum ether) revealed complete consumption of *rac*-**2a**. The reaction mixture was filtered through a short pad of Celite<sup>®</sup>, washed with  $\text{CH}_2\text{Cl}_2$  and concentrated under reduced pressure to obtain a yellow sticky liquid. The residue was purified by silica-gel flash column chromatography (3-4% EtOAc in petroleum ether) to obtain  $\beta$ -allenyl 2-hydroxynaphthoquinone **3aa** as yellow sticky liquid (454 mg, 1.5 mmol, 75% yield and 99.5:0.5 er).

# J. Procedure for the synthesis of **4**:

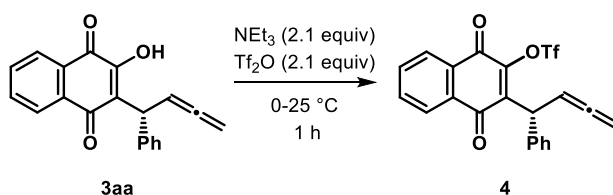

In an oven dried 10 mL round-bottom flask, **3aa** (50.0 mg, 0.165 mmol, 1.0 equiv) was dissolved in 2 mL of anh.  $\text{CH}_2\text{Cl}_2$  under argon atmosphere and cooled to 0 °C. To this yellow solution,  $\text{NEt}_3$  (48  $\mu\text{L}$ , 0.347 mmol, 2.1 equiv) was added dropwise at 0 °C to obtain deep red solution followed by dropwise addition of triflic anhydride ( $\text{Tf}_2\text{O}$ ) (58  $\mu\text{L}$ , 0.347 mmol, 2.1 equiv). The resulting mixture was then allowed to attain ambient temperature and stirred at that temperature for 1 h. Upon completion (monitored by TLC), the reaction mixture was quenched with 2 mL saturated  $\text{NaHCO}_3$  solution and diluted with 2 mL of distilled  $\text{H}_2\text{O}$ , and 2 mL of  $\text{CH}_2\text{Cl}_2$ . The organic phase was separated, and the aqueous phase was extracted with  $\text{CH}_2\text{Cl}_2$  (2  $\times$  2 mL). The combined organic phase was washed with brine (3 mL), dried over anh.  $\text{Na}_2\text{SO}_4$  and concentrated under reduced pressure. The residue was purified by silica gel flash column chromatography (1-2% EtOAc in petroleum ether) to obtain **4** as a sticky yellow liquid (60.0 mg, 0.135 mmol, 83% yield); **FT-IR (Thin film)**: 2923 (w), 2853 (w), 1955

(w), 1681 (s), 1593 (m), 1287 (m), 1220 (s);  **$^1\text{H-NMR}$  (400 MHz,  $\text{CDCl}_3$ ):**  $\delta$  8.11-8.09 (m, 1H), 7.96-7.92 (m, 1H), 7.73-7.67 (m, 2H), 7.30-7.23 (m, 4H), 7.19-7.15 (m, 1H), 5.87-5.82 (m, 1H), 5.05 (d,  $J$  = 8.6 Hz, 1H), 4.82-4.71 (m, 2H);  **$^{13}\text{C-NMR}$  (100 MHz,  $\text{CDCl}_3$ ):**  $\delta$  209.7, 182.7, 177.5, 149.2, 140.4, 139.0, 135.2, 134.7, 131.9, 129.9, 128.8, 127.6, 127.5, 127.4, 127.1, 118.8 (q,  $J$  = 332.5 Hz), 89.2, 76.8, 42.8;  **$^{19}\text{F-NMR}$  (376 MHz,  $\text{CDCl}_3$ ):**  $\delta$  -71.6; **HRMS (ESI+):** Calcd. for  $\text{C}_{21}\text{H}_{14}\text{F}_3\text{O}_5\text{S}$  ( $[\text{M}+\text{H}]^+$ ): 435.0514, Found: 435.0511; **Optical rotation:**  $[\alpha]_{\text{D}}^{22} +7.3$  ( $c$  2.0,  $\text{CHCl}_3$ ). The absolute stereochemistry of the product **4** was assigned in analogy with *trans*-**10** (see below).

#### K. Procedure for the synthesis of thioether **5**:

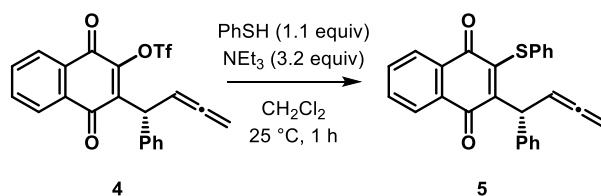

In an oven dried 10 mL round-bottom flask, **4** (20.0 mg, 0.046 mmol, 1.0 equiv) was dissolved in 1 mL of anh.  $\text{CH}_2\text{Cl}_2$  under the argon atmosphere. To this yellow solution, PhSH (8  $\mu\text{L}$ , 0.055 mmol, 1.1 equiv) was added dropwise and stirred at ambient temperature for 30 min.  $\text{NEt}_3$  (22.3  $\mu\text{L}$ , 0.16 mmol, 3.2 equiv) was then added and the resulting mixture was allowed to stir for 30 min. Upon completion (monitored by TLC), the reaction mixture was quenched with 2 mL saturated aqueous  $\text{NH}_4\text{Cl}$  solution, diluted with 1 mL of distilled  $\text{H}_2\text{O}$  and 1 mL of  $\text{CH}_2\text{Cl}_2$ . The organic phase was separated, and the aqueous phase was extracted with  $\text{CH}_2\text{Cl}_2$  (2  $\times$  2 mL). The combined organic phase was washed with brine (1 mL), dried over anh.  $\text{Na}_2\text{SO}_4$  and concentrated under reduced pressure. The residue was purified by silica gel flash column chromatography (1-2% EtOAc in petroleum ether) to obtain **5** as a sticky yellow liquid (17 mg, 0.043 mmol, 93% yield); **FT-IR (Thin film):** 3062 (w), 2923 (w), 2856 (w), 1952 (w), 1664 (s), 1590 (m), 1483 (w), 1444 (w), 1319 (w), 1274 (s);  **$^1\text{H-NMR}$  (400 MHz,  $\text{CDCl}_3$ ):**  $\delta$  7.96-7.94 (m, 1H), 7.88-7.86 (m, 1H), 7.63-7.55 (m, 2H), 7.35-7.33 (m, 2H), 7.29-7.26 (m, 2H), 7.24-7.14 (m, 6H), 6.00-5.95 (m, 1H), 5.77 (d,  $J$  = 8.3 Hz, 1H), 4.75-4.69 (m, 2H);  **$^{13}\text{C-NMR}$  (100 MHz,  $\text{CDCl}_3$ ):**  $\delta$  209.8, 182.2, 180.6, 153.3, 146.5, 140.9, 134.6, 134.0, 133.8, 132.6, 132.4, 130.8, 129.3, 128.6, 127.62, 127.56, 127.2, 127.0, 126.8, 90.6, 76.4, 46.7; **HRMS (ESI+):** Calcd. for  $\text{C}_{26}\text{H}_{19}\text{SO}_2$  ( $[\text{M}+\text{H}]^+$ ): 395.1106, Found: 395.1106; **Optical rotation:**  $[\alpha]_{\text{D}}^{22} -12.6$  ( $c$  1.0,  $\text{CHCl}_3$ ) for an enantiomerically enriched sample with 98:2 er. The enantiomeric ratio was determined by HPLC analysis using Phenomenex Cellulose-2 column (90:10 *n*-Hexane/IPA, 1.0 mL/min, 20  $^\circ\text{C}$ , 251 nm,  $\tau_{\text{major}}$  = 5.8 min,  $\tau_{\text{minor}}$  = 7.0 min). See Supporting Information: Part B for HPLC chromatograms. The absolute stereochemistry of the product **5** was assigned in analogy with *trans*-**10** (see below).

**L. Procedure for Au-catalyzed cyclization of 3aa:**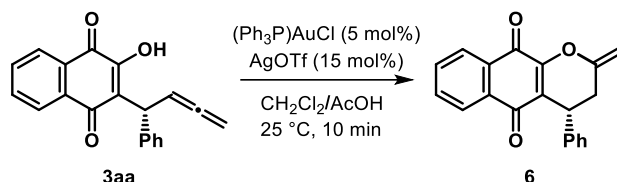

In an oven dried reaction tube, **3aa** (20.0 mg, 0.066 mmol, 1.0 equiv),  $\text{PPh}_3\text{AuCl}$  (1.7 mg, 0.0053 mmol, 5 mol%) and  $\text{AgOTf}$  (2.7 mg, 0.0105 mmol, 15 mol%) were dissolved in 1 mL of  $\text{CH}_2\text{Cl}_2$ . To this cloudy colorless solution, 4.8  $\mu\text{L}$  of  $\text{AcOH}$  was added and the resulting light brown solution was allowed to stir at ambient temperature under argon atmosphere for 10 min. Upon completion, the reaction mixture was quenched with 2 mL saturated solution of  $\text{NaHCO}_3$ , diluted with 2 mL of distilled  $\text{H}_2\text{O}$  and 3 mL of  $\text{CH}_2\text{Cl}_2$ . The organic phase was separated, and the aqueous phase was extracted with  $\text{CH}_2\text{Cl}_2$  ( $2 \times 2$  mL). The combined organic phase was washed with brine (3 mL), dried over anhydrous  $\text{Na}_2\text{SO}_4$  and concentrated under reduced pressure. The residue was purified by silica gel flash column chromatography (7-8%  $\text{EtOAc}$  in petroleum ether) to obtain **6** as a sticky yellow liquid (20.0 mg, 0.066 mmol, >99% yield); **FT-IR (Thin film)**: 3024 (w), 2920 (w), 2853 (w), 1653 (s), 1601 (s), 1485 (m), 1447 (m), 1363 (s), 1285 (m);  **$^1\text{H-NMR}$  (400 MHz,  $\text{CDCl}_3$ )**:  $\delta$  8.05 (d,  $J = 7.5$  Hz, 1H), 7.93 (d,  $J = 7.7$  Hz, 1H), 7.69-7.65 (m, 1H), 7.53-7.50 (m, 1H), 7.48-7.40 (m, 1H), 7.21-7.18 (m, 2H), 7.16-7.13 (m, 2H), 4.95 (s, 1H), 4.33-4.31 (m, 2H), 2.81 (dd,  $J = 14.5, 6.2$  Hz, 1H), 2.62 (d,  $J = 14.4$  Hz, 1H);  **$^{13}\text{C-NMR}$  (100 MHz,  $\text{CDCl}_3$ )**:  $\delta$  179.1, 177.7, 160.0, 152.0, 142.1, 135.2, 131.4, 131.3, 130.6, 129.4, 128.6, 127.6, 127.1, 124.7, 116.4, 97.5, 34.4, 33.2; **HRMS (ESI+)**: Calcd. for  $\text{C}_{20}\text{H}_{14}\text{O}_3\text{Na}$  ( $[\text{M}+\text{Na}]^+$ ): 325.0841, Found: 325.0842; **Optical rotation**:  $[\alpha]_{\text{D}}^{22} -13.4$  ( $c$  1.0,  $\text{CHCl}_3$ ) for an enantiomerically enriched sample with 94:6 er. The enantiomeric ratio was determined by HPLC analysis using Daicel Chiralpak AD-H column (80:20  $n$ -Hexane/IPA, 1.0 mL/min, 20  $^\circ\text{C}$ , 317 nm,  $\tau_{\text{major}} = 7.8$  min,  $\tau_{\text{minor}} = 11.2$  min). See Supporting Information: Part B for HPLC chromatograms. The absolute stereochemistry of the product **6** was assigned in analogy with *trans*-**10** (see below).

**M. Procedure for Rh-catalyzed cyclization of 3aa:**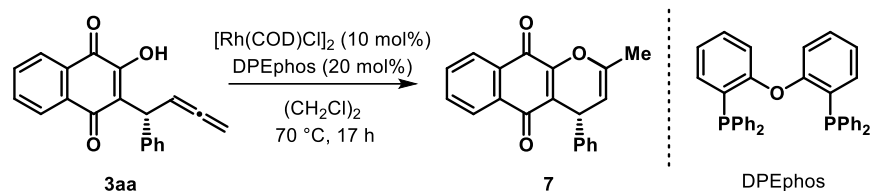

In a 10 mL round bottom flask, **3aa** (20.0 mg, 0.066 mmol, 1.0 equiv),  $[\text{Rh}(\text{COD})\text{Cl}]_2$  (4.9 mg, 0.0066 mmol, 10 mol%), and DPEphos (10.8 mg, 0.132 mmol, 20 mol%) were taken along with 1 mL of anhydrous  $(\text{CH}_2\text{Cl}_2)_2$  under positive argon pressure. The resulting orange solution was then heated to 70 °C for 17 h. Upon completion, the reaction mixture was passed through a short pad of Celite® and the filtrate was concentrated under reduced pressure to obtain yellow sticky liquid. The residue was purified by silica gel flash column chromatography (3-4% EtOAc in petroleum ether) to obtain **7** as a yellow solid (15.0 mg, 0.049 mmol, 74% yield); **m.p.** 185-186 °C; **FT-IR (Thin film)**: 3025 (w), 2922 (w), 1676 (s), 1589 (m), 1449 (w), 1373 (w), 1330 (m), 1298 (m);  **$^1\text{H-NMR}$  (400 MHz,  $\text{CDCl}_3$ )**:  $\delta$  8.13-8.11 (m, 1H), 7.98-7.95 (m, 1H), 7.69-7.67 (m, 2H), 7.37-7.35 (m, 2H), 7.32-7.29 (m, 2H), 7.22-7.19 (m, 1H), 5.03 (d,  $J = 4.3$  Hz, 1H), 4.65 (d,  $J = 4.1$  Hz, 1H), 2.08 (s, 3H);  **$^{13}\text{C-NMR}$  (100 MHz,  $\text{CDCl}_3$ )**:  $\delta$  184.1, 179.0, 151.2, 147.1, 144.5, 134.3, 133.5, 132.0, 131.0, 128.8, 128.5, 127.3, 126.5, 126.4, 122.1, 103.5, 36.1, 18.8; **HRMS (ESI+)**: Calcd. for  $\text{C}_{20}\text{H}_{14}\text{O}_3\text{Na}$  ( $[\text{M}+\text{Na}]^+$ ): 325.0841, Found: 325.0840; **Optical rotation**:  $[\alpha]_{\text{D}}^{22} +273.0$  ( $c$  1.0  $\text{CHCl}_3$ ) for an enantiomerically enriched sample with 99:1 er. The enantiomeric ratio was determined by HPLC analysis using Daicel Chiralpak IH column (80:20 *n*-Hexane/IPA, 1.0 mL/min, 20 °C, 234 nm,  $\tau_{\text{minor}} = 6.1$  min,  $\tau_{\text{major}} = 6.6$  min). See Supporting Information: Part B for HPLC chromatograms. The absolute stereochemistry of the product **7** was assigned in analogy with *trans*-**10** (see below).

**N. Procedure for bromocyclization of 3aa:**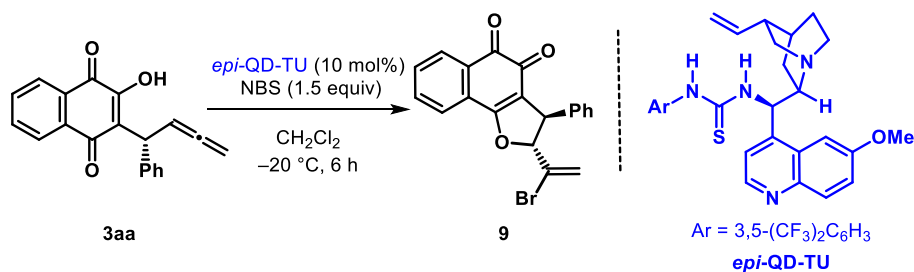

In an oven dried 10 mL round-bottom flask, *epi*-**QD-TU** (9.8 mg, 0.0165 mmol, 10 mol%) and recrystallized *N*-bromosuccinimide (NBS) (44 mg, 0.248 mmol, 1.5 equiv) were taken in 1.6 mL of dry  $\text{CH}_2\text{Cl}_2$  under argon atmosphere and cooled to -20 °C. The resulting orange solution was allowed to stir at -20 °C for 2 min. To this, a solution of **3aa** (50 mg, 0.165 mmol, 1.0 equiv) in 0.4 mL of  $\text{CH}_2\text{Cl}_2$  was added under positive argon pressure. The reaction mixture was allowed to stir at -20 °C for 6 h. Upon completion (monitored by TLC), the clear yellow solution was allowed to attain ambient

temperature and quenched with dropwise addition of 2 mL of saturated aqueous  $\text{Na}_2\text{S}_2\text{O}_3$  solution. The organic layer was separated, and the aqueous layer was extracted with  $\text{CH}_2\text{Cl}_2$  ( $3 \times 2$  mL). The combined organic layer was washed with brine (3 mL), dried over anhydrous  $\text{Na}_2\text{SO}_4$  and concentrated under reduced pressure to obtain a sticky yellow liquid. The diastereomeric ratio (dr) was determined to be 10:1 by  $^1\text{H}$  NMR analysis of the unpurified reaction mixture. The residue was purified by silica-gel flash column chromatography (7-9% EtOAc in petroleum ether) to obtain *trans*-**9** and *cis*-**9** separately (53 mg, 0.137 mmol, 82% combined yield). For *trans*-**9** (sticky yellow liquid, 45 mg, 0.117 mmol, 71% yield); **FT-IR (Thin film)**: 3020 (w), 2925 (w), 2856 (w), 1654 (s), 1620 (s), 1451 (m), 1392 (m), 1278 (m);  **$^1\text{H}$ -NMR (400 MHz,  $\text{CDCl}_3$ )**:  $\delta$  8.06 (d,  $J = 7.5$  Hz, 1H), 7.73-7.71 (m, 1H), 7.68-7.64 (m, 1H), 7.60-7.56 (m, 1H), 7.19-7.16 (m, 3H), 7.11-7.09 (m, 2H), 5.96 (s, 1H), 5.69 (d,  $J = 9.5$  Hz, 1H), 5.49 (s, 1H), 4.77 (d,  $J = 9.2$  Hz, 1H);  **$^{13}\text{C}$ -NMR (100 MHz,  $\text{CDCl}_3$ )**:  $\delta$  180.5, 174.8, 168.7, 135.2, 134.9, 132.5, 131.1, 130.0, 129.4, 128.1, 128.0, 127.1, 124.9, 124.5, 119.3, 91.5, 49.1; **HRMS (ESI+)**: Calcd. for  $\text{C}_{20}\text{H}_{13}\text{BrO}_3\text{Na}$  ( $[\text{M}+\text{Na}]^+$ ): 402.9946, Found: 402.9942; **Optical rotation**:  $[\alpha]_{\text{D}}^{24} +14.1$  ( $c$  0.5,  $\text{CHCl}_3$ ) for an enantiomerically enriched sample with >99.9:0.1 er. The enantiomeric ratio was determined by HPLC analysis using Phenomenex Cellulose-2 column (70:30 *n*-Hexane/IPA, 1.0 mL/min, 20 °C, 274 nm,  $\tau_{\text{major}} = 39.4$  min,  $\tau_{\text{minor}} = 46.2$  min). See Supporting Information: Part B for HPLC chromatograms. The absolute and relative stereochemistry of the product *trans*-**9** was assigned in analogy with *trans*-**10** (see below). For *cis*-**9** (sticky yellow liquid, 7 mg, 0.018 mmol, 11% yield); **FT-IR (Thin film)**: 3066 (w), 2924 (w), 2855 (w), 1655 (s), 1620 (s), 1492 (w), 1451 (m), 1392 (m), 1279 (m);  **$^1\text{H}$ -NMR (400 MHz,  $\text{CDCl}_3$ )**:  $\delta$  8.07 (d,  $J = 7.4$  Hz, 1H), 7.73-7.71 (m, 1H), 7.68-7.64 (m, 1H), 7.60-7.56 (m, 1H), 7.29-7.26 (m, 2H), 7.23-7.19 (m, 3H), 5.93 (s, 1H), 5.68 (s, 1H), 5.24 (d,  $J = 5.5$  Hz, 1H), 4.58 (d,  $J = 5.4$  Hz, 1H);  **$^{13}\text{C}$ -NMR (100 MHz,  $\text{CDCl}_3$ )**:  $\delta$  180.7, 175.1, 168.9, 139.8, 134.9, 132.5, 131.3, 130.0, 129.6, 129.3, 128.0, 127.5, 127.2, 124.9, 120.1, 117.9, 95.9, 51.8; **HRMS (ESI+)**: Calcd. for  $\text{C}_{20}\text{H}_{14}\text{BrO}_3$  ( $[\text{M}+\text{H}]^+$ ): 381.0126, Found: 381.0125; **Optical rotation**:  $[\alpha]_{\text{D}}^{24} +13.2$  ( $c$  0.5,  $\text{CHCl}_3$ ) for an enantiomerically enriched sample with >99.9:0.1 er. The enantiomeric ratio was determined by HPLC analysis using Phenomenex Cellulose-2 column (70:30 *n*-Hexane/IPA, 1.0 mL/min, 20 °C, 264 nm,  $\tau_{\text{minor}} = 19.6$  min,  $\tau_{\text{major}} = 21.1$  min). See Supporting Information: Part B for HPLC chromatograms. The absolute and relative stereochemistry of the product *cis*-**9** was assigned in analogy with *trans*-**10** (see below).

**O. Procedure for iodocyclization of 3aa:**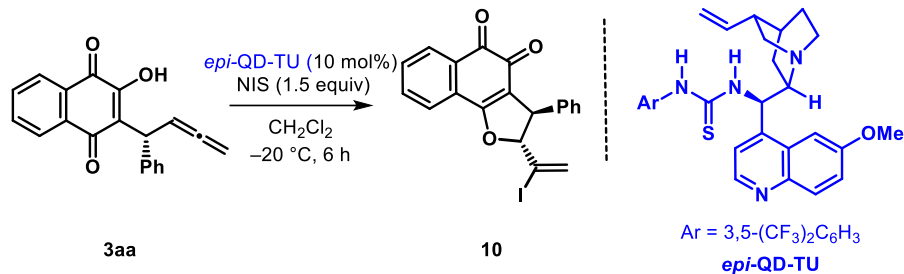

In an oven dried 10 mL round-bottom flask, **epi-QD-TU** (9.8 mg, 0.0165 mmol, 10 mol%) and *N*-iodosuccinimide (NIS) (56 mg, 0.248 mmol, 1.5 equiv) were taken in 1.6 mL of dry  $\text{CH}_2\text{Cl}_2$  under argon atmosphere and cooled to  $-20^\circ\text{C}$ . The resulting orange solution was allowed to stir at  $-20^\circ\text{C}$  for 2 min. To this, a solution of **3aa** (50 mg, 0.165 mmol, 1.0 equiv) in 0.4 mL of  $\text{CH}_2\text{Cl}_2$  was added under positive argon pressure. The reaction mixture was allowed to stir at  $-20^\circ\text{C}$  for 6 h. Upon completion, the clear yellow solution was allowed to attain ambient temperature and quenched with dropwise addition of 2 mL of saturated aqueous  $\text{Na}_2\text{S}_2\text{O}_3$  solution. The organic layer was separated, and the aqueous layer was extracted with  $\text{CH}_2\text{Cl}_2$  ( $3 \times 2$  mL). The combined organic layer was washed with brine (3 mL), dried over anhydrous  $\text{Na}_2\text{SO}_4$  and concentrated under reduced pressure to obtain a sticky yellow liquid. The diastereomeric ratio (dr) was determined to be 1.5:1 by  $^1\text{H}$  NMR analysis of the unpurified reaction mixture. The crude residue was purified by silica-gel flash column chromatography (7-9% EtOAc in petroleum ether) to obtain *trans*-**10** and *cis*-**10** separately (60 mg, 0.142 mmol, 86% combined yield). For *trans*-**10** (yellow solid, 36 mg, 0.086 mmol, 52% yield); **m.p.** 145-146  $^\circ\text{C}$ ; **FT-IR (Thin film)**: 3014 (w), 2922 (w), 2854 (w), 1616 (s), 1575 (s), 1489 (m), 1451 (w), 1389 (m), 1279 (s);  **$^1\text{H}$ -NMR (400 MHz,  $\text{CDCl}_3$ )**:  $\delta$  8.06 (d,  $J = 7.6$  Hz, 1H), 7.73-7.71 (m, 1H), 7.68-7.64 (m, 1H), 7.59-7.56 (m, 1H), 7.19-7.16 (m, 3H), 7.13-7.12 (m, 2H), 6.44 (s, 1H), 5.81 (s, 1H), 5.70 (d,  $J = 9.1$  Hz, 1H), 4.79 (d,  $J = 8.8$  Hz, 1H);  **$^{13}\text{C}$ -NMR (100 MHz,  $\text{CDCl}_3$ )**:  $\delta$  180.5, 174.8, 168.7, 135.1, 134.9, 132.5, 131.1, 130.0, 129.8, 128.1, 127.9, 127.8, 127.2, 124.9, 119.4, 100.0, 93.7, 49.2; **HRMS (ESI+)**: Calcd. for  $\text{C}_{20}\text{H}_{13}\text{IO}_3\text{Na}$  ( $[\text{M}+\text{Na}]^+$ ): 450.9807, Found: 450.9808; **Optical rotation**:  $[\alpha]_{\text{D}}^{24} +24.6$  ( $c$  1.0,  $\text{CHCl}_3$ ) for an enantiomerically enriched sample with >99.9:0.1 er. The enantiomeric ratio was determined by HPLC analysis using Phenomenex Cellulose-2 column (70:25:5 *n*-Hexane/IPA/EtOH, 3.0 mL/min,  $20^\circ\text{C}$ , 257 nm,  $\tau_{\text{major}} = 12.5$  min,  $\tau_{\text{minor}} = 14.7$  min). See Supporting Information: Part B for HPLC chromatograms. The absolute and relative stereochemistry of the product *trans*-**10** was determined by single crystal X-ray diffraction analysis (see below). For *cis*-**10** (yellow sticky liquid, 24 mg, 0.056 mmol, 34% yield); **FT-IR (Thin film)**: 3013 (w), 2922 (w), 2854 (w), 1651 (s), 1615 (s), 1489 (w), 1450 (w), 1390 (m), 1277 (m);  **$^1\text{H}$ -NMR (400 MHz,  $\text{CDCl}_3$ )**:  $\delta$  8.07 (d,  $J = 8.7$  Hz, 1H), 7.73-7.71 (m, 1H), 7.68-7.64 (m, 1H), 7.60-7.56 (m, 1H), 7.29-7.26 (m, 2H), 7.23-7.19 (m, 3H), 6.39-6.38 (m, 1H), 5.96 (d,  $J = 2.1$  Hz, 1H), 4.96 (d,  $J = 6.0$  Hz, 1H), 4.44 (d,  $J = 5.8$  Hz, 1H);  **$^{13}\text{C}$ -NMR (100 MHz,  $\text{CDCl}_3$ )**:  $\delta$  180.7, 175.0, 168.9, 139.5, 134.9, 132.5, 131.2, 129.9, 129.2, 128.5, 128.0, 127.6, 127.2, 125.0, 117.7, 107.6, 97.9, 52.9; **HRMS (ESI+)**: Calcd. for  $\text{C}_{20}\text{H}_{13}\text{IO}_3$  ( $[\text{M}+\text{Na}]^+$ ):

450.9807, Found: 450.9807; **Optical rotation:**  $[\alpha]_{\text{D}}^{24} +15.1$  ( $c$  1.0,  $\text{CHCl}_3$ ) for an enantiomerically enriched sample with >99.9:0.1 er. The enantiomeric ratio was determined by HPLC analysis using Phenomenex Cellulose-2 column (70:30  $n$ -Hexane/IPA, 1.0 mL/min, 20 °C, 280 nm,  $\tau_{\text{minor}} = 20.3$  min  $\tau_{\text{major}} = 22.2$  min). See Supporting Information: Part B for HPLC chromatograms. The absolute and relative stereochemistry of the product *cis*-**10** was assigned in analogy with *trans*-**10**.

#### P. Procedure for the synthesis of quinoxaline **11**:

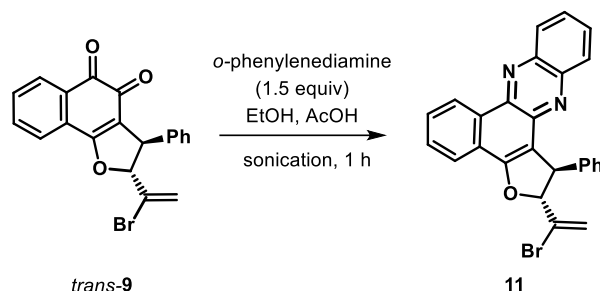

In an oven dried 10 mL round-bottom flask, *trans*-**9** (25.0 mg, 0.07 mmol, 1.0 equiv) and *o*-phenylenediamine (11.4 mg, 0.105 mmol, 1.5 equiv) were taken in 1 mL of ethanol under argon atmosphere. To this yellow solution, 10  $\mu$ L of AcOH was added and the resulting mixture was sonicated at 25 °C for 1 h. After TLC revealed the complete consumption of *trans*-**9**, the volatiles were evaporated under reduced pressure to obtain a sticky yellow liquid. The residue was purified by silica gel (100-200 mesh) column chromatography (1-2 % EtOAc in Petroleum ether) to obtain **11** as a yellow solid (32 mg, 0.07 mmol, >99% yield); **m.p.** 243-244 °C; **FT-IR (Thin film):** 3058 (w), 2923 (m), 2855 (w), 1949 (w), 1683 (m), 1637 (s), 1499 (m), 1425 (m), 1343 (s), 1291 (m); **<sup>1</sup>H-NMR (400 MHz,  $\text{CDCl}_3$ ):**  $\delta$  9.34-9.32 (m, 1H), 8.17-8.12 (m, 2H), 7.97-7.95 (m, 1H), 7.79-7.77 (m, 2H), 7.65-7.61 (m, 2H), 7.17-7.14 (m, 2H), 7.11-7.06 (m, 3H), 6.12-6.11 (m, 1H), 5.84 (d,  $J = 8.4$  Hz, 1H), 5.50 (s, 1H), 5.40 (d,  $J = 8.2$  Hz, 1H); **<sup>13</sup>C-NMR (100 MHz,  $\text{CDCl}_3$ ):**  $\delta$  141.5, 140.4, 137.4, 132.4, 130.2, 130.1, 129.8, 129.6, 129.0, 128.7, 127.8, 127.3, 126.3, 125.9, 124.1, 122.6, 118.7, 117.8, 91.2, 50.8; **HRMS (ESI+):** Calcd. for  $\text{C}_{26}\text{H}_{18}\text{BrN}_2\text{O}$  ( $[\text{M}+\text{H}]^+$ ): 453.0603, Found: 453.0603; **Optical rotation:**  $[\alpha]_{\text{D}}^{22} -66.0$  ( $c$  1.0,  $\text{CHCl}_3$ ) for an enantiomerically enriched sample with 96:4 er. The enantiomeric ratio was determined by HPLC analysis using Phenomenex Amylose-2 column (95:5  $n$ -Hexane/IPA, 0.5 mL/min, 20 °C, 280 nm,  $\tau_{\text{minor}} = 9.2$  min,  $\tau_{\text{major}} = 9.8$  min). See Supporting Information: Part B for HPLC chromatograms. The absolute stereochemistry of the product **11** was assigned in analogy with *trans*-**10** (see below).

**Q. General procedure for the hydrogenation of 3:**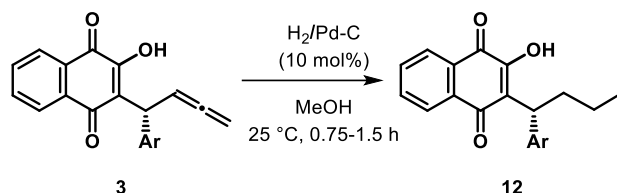

In an oven and vacuum-dried 10 mL round-bottom flask, a solution of **3** (1.0 equiv) in MeOH (2.0 mL), 10% Pd/C (10 mol%) were added. The resulting mixture was degassed and stirred under H<sub>2</sub> balloon pressure for 45 min to 1.5 h at 25 °C. The reaction mixture was filtered over Celite<sup>®</sup> and washed with CH<sub>2</sub>Cl<sub>2</sub>. The filtrate was concentrated under reduced pressure and the residue was purified by silica gel flash column chromatography (1-2% EtOAc in petroleum ether) to obtain **12**.

**Compound 12a:** Reaction was performed on 0.25 mmol scale, reaction time 45 min, purified by silica-gel flash column chromatography (1-2% EtOAc in petroleum ether); sticky yellow liquid (77.0 mg, 0.25 mmol, >99% yield); **FT-IR (Thin film):** 3351 (br), 3052 (w), 2924 (w), 1953 (w), 1654 (s), 1592 (m), 1368 (s), 1269 (m); **<sup>1</sup>H-NMR (400 MHz, CDCl<sub>3</sub>):**  $\delta$  8.02 (d,  $J$  = 7.7 Hz, 1H), 7.96 (d,  $J$  = 7.6 Hz, 1H), 7.68-7.64 (m, 1H), 7.59-7.55 (m, 1H), 7.41-7.39 (m, 2H), 7.21-7.18 (m, 2H), 7.11-7.08 (m, 1H), 4.44 (t,  $J$  = 7.8 Hz, 1H), 2.23-2.21 (m, 1H), 2.12-2.07 (m, 1H), 1.29-1.23 (m, 2H), 0.87 (t,  $J$  = 6.7 Hz, 3H); **<sup>13</sup>C-NMR (100 MHz, CDCl<sub>3</sub>):**  $\delta$  184.5, 182.1, 153.2, 143.1, 135.2, 133.1, 133.0, 129.3, 128.6, 128.3, 127.2, 126.4, 126.1, 125.9, 40.8, 33.7, 21.7, 14.3; **HRMS (ESI<sup>+</sup>):** Calcd. for C<sub>20</sub>H<sub>18</sub>O<sub>3</sub>Na ([M+Na]<sup>+</sup>): 329.1154, Found: 329.1151; **Optical rotation:**  $[\alpha]_{\text{D}}^{20}$  +74.0 ( $c$  1.0, CHCl<sub>3</sub>). The absolute stereochemistry of the product **12a** was assigned in analogy with *trans*-**10**.

**Compound 12b:** Reaction was performed on 0.05 mmol scale; reaction time 45 min, purified by silica-gel flash column chromatography (1-2% EtOAc in petroleum ether); sticky yellow liquid (20.0 mg, 0.054 mmol, >99% yield); **FT-IR (Thin film):** 3362 (br), 2960 (w), 2930 (w), 2867 (w), 1657 (s), 1594 (w), 1373 (m), 1326 (s), 1277 (m); **<sup>1</sup>H-NMR (400 MHz, CDCl<sub>3</sub>):**  $\delta$  8.10 (d,  $J$  = 7.7 Hz, 1H), 8.06 (d,  $J$  = 7.7 Hz, 1H), 7.77-7.74 (m, 1H), 7.69-7.66 (m, 1H), 7.59-7.57 (m, 3H), 7.53-7.51 (m, 2H), 4.56 (t,  $J$  = 7.9 Hz, 1H), 2.34-2.27 (m, 1H), 2.22-2.13 (m, 1H), 1.37-1.31 (m, 2H), 0.95 (t,  $J$  = 7.5 Hz, 3H); **<sup>13</sup>C-NMR (100 MHz, CDCl<sub>3</sub>):**  $\delta$  184.4, 181.8, 153.2, 147.0, 135.4, 133.2, 133.0, 129.3, 129.1, 128.6 (q,  $J$  = 32.7 Hz), 128.0, 127.3, 126.3, 124.4 (q,  $J$  = 271.4 Hz), 125.2 (q,  $J$  = 3.8 Hz), 40.7, 33.4, 21.6, 14.2; **<sup>19</sup>F-NMR (376 MHz, CDCl<sub>3</sub>):**  $\delta$  -62.4; **HRMS (ESI<sup>+</sup>):** Calcd. for C<sub>21</sub>H<sub>18</sub>F<sub>3</sub>O<sub>3</sub> ([M+H]<sup>+</sup>): 375.1208, Found: 375.1206; **Optical rotation:**  $[\alpha]_{\text{D}}^{24}$  +66.6 ( $c$  0.75, CHCl<sub>3</sub>) for an enantiomerically enriched sample with 99.3:0.7 er. The enantiomeric ratio was determined by HPLC analysis using Daicel Chiralpak AD-H column (95:5 *n*-Hexane/IPA, 0.5 mL/min, 20 °C, 280 nm,  $\tau_{\text{minor}}$

= 14.5 min  $\tau_{\text{major}}$  = 15.4 min). See Supporting Information: Part B for HPLC chromatograms. The absolute stereochemistry of the product **12b** was assigned in analogy with *trans*-**10** (see below).

**Compound 12c:** Reaction was performed on 0.06 mmol scale, reaction time 1.5 h, purified by silica-gel flash column chromatography (1-2% EtOAc in petroleum ether); sticky yellow liquid (21.0 mg, 0.062 mmol, >99% yield); **FT-IR (Thin film):** 3357 (br), 3071 (w), 2927 (w), 2865 (w), 1654 (s), 1591 (m), 1454 (m), 1370 (s), 1275 (s);  **$^1\text{H}$ -NMR (400 MHz,  $\text{CDCl}_3$ ):**  $\delta$  8.10 (d,  $J$  = 7.5 Hz, 1H), 8.05 (d,  $J$  = 7.5 Hz, 1H), 7.76-7.73 (m, 1H), 7.68-7.64 (m, 1H), 7.58 (s, 1H), 7.21-7.19 (m, 3H), 6.88-6.84 (m, 1H), 4.50 (t,  $J$  = 7.8 Hz, 1H), 2.33-2.23 (m, 1H), 2.19-2.10 (m, 1H), 1.36-1.30 (m, 2H), 0.94 (t,  $J$  = 7.4 Hz, 3H);  **$^{13}\text{C}$ -NMR (100 MHz,  $\text{CDCl}_3$ ):**  $\delta$  184.4, 181.9, 162.9 (d,  $J$  = 247.5 Hz), 153.2, 145.6, 145.5, 135.3, 133.1 (d,  $J$  = 7.7 Hz), 129.6 (d,  $J$  = 8.6 Hz), 129.3, 127.2, 126.2, 125.2, 124.3 (d,  $J$  = 2.9 Hz), 115.5 (d,  $J$  = 21.9 Hz), 113.3 (d,  $J$  = 20.7 Hz), 40.5, 33.5, 21.6, 14.2;  **$^{19}\text{F}$ -NMR (376 MHz,  $\text{CDCl}_3$ ):**  $\delta$  -113.4; **HRMS (ESI $^+$ ):** Calcd. for  $\text{C}_{20}\text{H}_{18}\text{FO}_3$  ( $[\text{M}+\text{H}]^+$ ): 325.1240, Found: 325.1243; **Optical rotation:**  $[\alpha]_{\text{D}}^{24}$  +137.4 ( $c$  0.5,  $\text{CHCl}_3$ ) for an enantiomerically enriched sample with 99.4:0.6 er. The enantiomeric ratio was determined by HPLC analysis using Daicel Chiralpak AD-H column (95:5 *n*-Hexane/IPA, 0.5 mL/min, 20 °C, 253 nm,  $\tau_{\text{minor}}$  = 18.6 min  $\tau_{\text{major}}$  = 19.9 min). See Supporting Information: Part B for HPLC chromatograms. The absolute stereochemistry of the product **12c** was assigned in analogy with *trans*-**10** (see below).

## R. Procedure for the synthesis of 13:

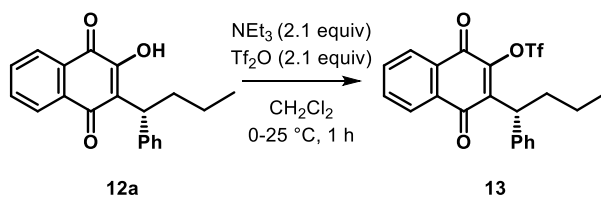

In an oven dried 10 mL round-bottom flask, **12a** (77.0 mg, 0.25 mmol, 1.0 equiv) was dissolved in 2 mL of anh.  $\text{CH}_2\text{Cl}_2$  under argon atmosphere and cooled to 0 °C. To this yellow solution,  $\text{NEt}_3$  (74  $\mu\text{L}$ , 0.53 mmol, 2.1 equiv) was added dropwise at 0 °C to obtain deep red solution followed by dropwise addition of triflic anhydride ( $\text{Tf}_2\text{O}$ ) (150  $\mu\text{L}$ , 0.53 mmol, 2.1 equiv). The resulting mixture was then allowed to attain ambient temperature and stirred at 25 °C for 1 h. Upon completion (monitored by TLC), the reaction mixture was quenched with 3 mL saturated aqueous  $\text{NaHCO}_3$  solution, diluted with 3 mL of distilled  $\text{H}_2\text{O}$  and 2 mL of  $\text{CH}_2\text{Cl}_2$ . The organic phase was separated, and the aqueous phase was extracted with  $\text{CH}_2\text{Cl}_2$  ( $2 \times 3\text{ mL}$ ). The combined organic phase was washed with brine (2 mL), dried over anh.  $\text{Na}_2\text{SO}_4$  and concentrated under reduced pressure to obtain a sticky yellow liquid. The residue was purified by silica gel flash column chromatography (1-2% EtOAc in petroleum ether) to obtain **13** as a yellow solid (81.0 mg, 0.184 mmol, 74% yield); **m.p.** 68-69 °C; **FT-IR (Thin film):** 3067 (w), 2926 (w), 2866 (w), 1680 (s), 1596 (w), 1423 (m), 1286 (m);  **$^1\text{H}$ -NMR (400 MHz,  $\text{CDCl}_3$ ):**

$\delta$  8.17-8.13 (m, 1H), 8.04-8.00 (m, 1H), 7.79-7.74 (m, 2H), 7.43-7.41 (m, 2H), 7.34-7.30 (m, 2H), 7.24-7.21 (m, 1H), 4.38 (t,  $J$  = 7.6 Hz, 1H), 2.47-2.37 (m, 1H), 2.28-2.19 (m, 1H), 1.49-1.40 (m, 1H), 1.35-1.26 (m, 1H), 0.98 (t,  $J$  = 7.1 Hz, 3H);  **$^{13}\text{C}$ -NMR (100 MHz,  $\text{CDCl}_3$ )**:  $\delta$  183.3, 177.3, 149.4, 142.2, 139.4, 135.1, 134.6, 132.1, 129.9, 128.8, 128.7, 127.4, 127.3, 127.0, 118.9 (q,  $J$  = 325.1 Hz), 43.2, 33.9, 21.6, 14.2;  **$^{19}\text{F}$ -NMR (376 MHz,  $\text{CDCl}_3$ )**:  $\delta$  -71.6; **HRMS (ESI+)**: Calcd. for  $\text{C}_{21}\text{H}_{18}\text{F}_3\text{O}_5\text{S}$  ( $[\text{M}+\text{H}]^+$ ): 439.0827, Found: 439.0825; **Optical rotation**:  $[\alpha]_{\text{D}}^{20}$  -21.0 ( $c$  1.0,  $\text{CHCl}_3$ ). The absolute stereochemistry of the product **13** was assigned in analogy with *trans*-**10**.

### S. Procedure for the Pd-catalyzed reductive cleavage of enol triflate **13**:

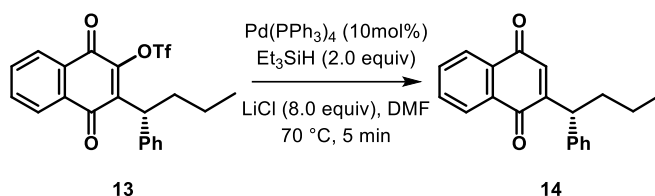

In an oven dried 10 mL round-bottom flask, **13** (15.0 mg, 0.034 mmol, 1.0 equiv),  $\text{Pd(PPh}_3)_4$  (7.9 mg, 0.0068 mmol, 20 mol%), and activated (heated at 150  $^\circ\text{C}$  for 1.5 h under reduced pressure) LiCl (11.5 mg, 0.272 mmol, 8.0 equiv) were dissolved in 1 mL of DMF under argon atmosphere, heated to 70  $^\circ\text{C}$  and stirred for 5 min. To the resulting brown solution,  $\text{Et}_3\text{SiH}$  (11  $\mu\text{L}$ , 0.068 mmol, 2.0 equiv) was added dropwise at 70  $^\circ\text{C}$  and the mixture was allowed to stir at same temperature for 5 min. Upon completion as revealed by TLC, the reaction mixture was diluted with 10 mL of distilled  $\text{H}_2\text{O}$  and 2 mL of  $\text{Et}_2\text{O}$ . The organic phase was separated, and the aqueous phase was extracted with  $\text{Et}_2\text{O}$  ( $2 \times 3$  mL). The combined organic phase was further extracted with  $\text{H}_2\text{O}$  ( $2 \times 3$  mL) and washed with brine (2 mL), dried over anhydrous  $\text{Na}_2\text{SO}_4$  and concentrated under reduced pressure to obtain a sticky yellow liquid. The residue was purified by silica gel flash column chromatography (2-3%  $\text{EtOAc}$  in petroleum ether) to obtain **14** as a sticky yellow liquid (7.0 mg, 0.024 mmol, 71% yield); **FT-IR (Thin film)**: 2960 (w), 2871 (w), 1681 (s), 1597 (w), 1423 (m), 1286 (m);  **$^1\text{H}$ -NMR (400 MHz,  $\text{CDCl}_3$ )**:  $\delta$  8.02 (dd,  $J$  = 7.6, 0.8 Hz, 1H), 7.96 (dd,  $J$  = 7.6, 1.0 Hz, 1H), 7.68-7.64 (m, 1H), 7.59-7.55 (m, 1H), 7.45 (s, 1H), 7.41-7.39 (m, 2H), 7.21-7.18 (m, 2H), 7.11-7.08 (m, 1H), 4.44 (t,  $J$  = 7.6 Hz, 1H), 2.29-2.20 (m, 1H), 2.14-2.05 (m, 1H), 1.29-1.24 (m, 2H), 0.87 (t,  $J$  = 7.2 Hz, 3H);  **$^{13}\text{C}$ -NMR (100 MHz,  $\text{CDCl}_3$ )**:  $\delta$  184.5, 182.0, 153.1, 143.0, 135.2, 133.1, 133.0, 129.3, 128.7, 128.3, 127.2, 126.4, 126.1, 125.9, 40.8, 33.7, 21.7, 14.3; **HRMS (ESI+)**: Calcd. for  $\text{C}_{20}\text{H}_{18}\text{O}_2\text{K}$  ( $[\text{M}+\text{K}]^+$ ): 329.0944, Found: 329.1146; **Optical rotation**:  $[\alpha]_{\text{D}}^{22}$  -35.8 ( $c$  1.0,  $\text{CHCl}_3$ ) for an enantiomerically enriched sample with >99.9:0.1 er. The enantiomeric ratio was determined by HPLC analysis using Phenomenex Cellulose-3 column (90:10 *n*-Hexane/IPA, 1.0 mL/min, 20  $^\circ\text{C}$ ), 254 nm,  $\tau_{\text{minor}}$  = 40.0 min,  $\tau_{\text{major}}$  = 45.9 min). See Supporting Information: Part B for HPLC chromatograms. The absolute stereochemistry of the product **14** was assigned in analogy with *trans*-**10**.

**T. Procedure for the Sonogashira coupling of **13** with phenylacetylene:**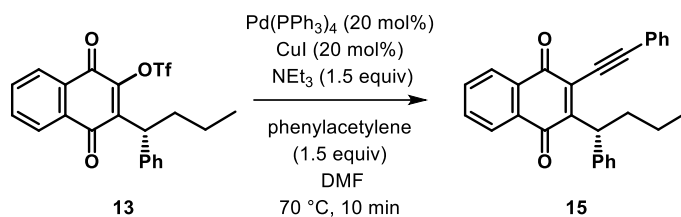

In an oven dried 10 mL round-bottom flask, **13** (15.0 mg, 0.034 mmol, 1.0 equiv), Pd(PPh<sub>3</sub>)<sub>4</sub> (7.9 mg, 0.0068 mmol, 20 mol%), and CuI (1.3 mg, 0.0068 mmol, 20 mol%) were dissolved in 1 mL of DMF under argon atmosphere and stirred at 25 °C for 5 min. To this orange solution, phenylacetylene (5.6  $\mu$ L, 0.051 mmol, 1.5 equiv) and NEt<sub>3</sub> (7.1  $\mu$ L, 0.051 mmol, 1.5 equiv) were added and the resulting brown solution was heated at 70 °C for 10 min. Upon completion (monitored by TLC), the reaction mixture was diluted with 10 mL of distilled H<sub>2</sub>O and 2 mL of Et<sub>2</sub>O. The organic phase was separated, and the aqueous phase was extracted with Et<sub>2</sub>O (2  $\times$  3 mL). The combined organic phase was further extracted with H<sub>2</sub>O (2  $\times$  3 mL) and washed with brine (2 mL), dried over anhydrous Na<sub>2</sub>SO<sub>4</sub> and concentrated under reduced pressure to obtain sticky yellow liquid. The residue was purified by silica gel flash column chromatography (2-3% EtOAc in petroleum ether) to obtain **15** as a yellow sticky liquid (10.0 mg, 0.025 mmol, 73% yield); **FT-IR (Thin film)**: 2926 (w), 2861 (w), 2195 (w), 1658 (s), 1491 (w), 1452 (m), 1331 (w), 1278 (m); **<sup>1</sup>H-NMR (400 MHz, CDCl<sub>3</sub>)**:  $\delta$  8.04-8.02 (m, 1H), 7.96-7.94 (m, 1H), 7.64-7.56 (m, 4H), 7.47-7.45 (m, 2H), 7.36 (m, 2H), 7.24-7.19 (m, 3H), 7.14-7.12 (m, 1H), 4.76 (t,  $J$  = 7.0 Hz, 1H), 2.44-2.39 (m, 1H), 2.27-2.22 (m, 1H), 1.40-1.32 (m, 2H), 0.92 (t,  $J$  = 7.1 Hz, 3H); **<sup>13</sup>C-NMR (100 MHz, CDCl<sub>3</sub>)**:  $\delta$  183.9, 181.9, 153.2, 141.8, 134.1, 133.7, 132.7, 132.3, 131.71, 131.67, 129.9, 128.7, 128.6, 128.4, 126.9, 126.7, 126.6, 122.3, 107.4, 83.9, 46.9, 34.1, 21.8, 14.4; **HRMS (ESI<sup>+</sup>)**: Calcd. for C<sub>28</sub>H<sub>23</sub>O<sub>2</sub> ([M+H]<sup>+</sup>): 391.1698, Found: 391.1698; **Optical rotation**:  $[\alpha]_D^{20}$  –18.2 ( $c$  1.0, CHCl<sub>3</sub>) for an enantiomerically enriched sample with 97:3 er. The enantiomeric ratio was determined by HPLC analysis using Daicel Chiralpak AD-H column (90:10 *n*-Hexane/IPA, 1.0 mL/min, 20 °C, 282 nm,  $\tau_{\text{major}}$  = 5.7 min,  $\tau_{\text{minor}}$  = 7.7 min). See Supporting Information: Part B for HPLC chromatograms. The absolute stereochemistry of the product **15** was assigned in analogy with *trans*-**10**.

**U. Single crystal X-ray diffraction analysis of *trans*-**10**:**

A single crystal of *trans*-**10** (recrystallized from 3:2 *n*-Hexane/CHCl<sub>3</sub> at 0 °C) was mounted and the diffraction data were collected at 100 K on a Bruker SMART APEX CCD diffractometer using SMART/SAINT software. Intensity data were collected using graphite-monochromatized Mo-K $\alpha$  radiation (0.71073 Å). The structures were solved by direct methods using the SHELX-97 and refined by full-matrix least-squares on  $F^2$ . Empirical absorption corrections were applied with SADABS. All

non-hydrogen atoms were refined anisotropically and hydrogen atoms were included in geometric positions. The structure was drawn using ORTEP-3. The crystallographic refinement parameters are given below:

**Table S3.** Crystal data and structure refinement for *trans*-**10**

|                                                |                                                                  |
|------------------------------------------------|------------------------------------------------------------------|
| Identification code                            | <i>trans</i> - <b>10</b>                                         |
| CCDC                                           | 2329091                                                          |
| Empirical formula                              | C <sub>20</sub> H <sub>13</sub> IO <sub>3</sub>                  |
| Formula weight                                 | 428.20                                                           |
| Temperature/K                                  | 100                                                              |
| Crystal system                                 | orthorhombic                                                     |
| Space group                                    | <i>P</i> 2 <sub>1</sub> 2 <sub>1</sub> 2 <sub>1</sub>            |
| <i>a</i>                                       | 5.24350(1) Å                                                     |
| <i>b</i>                                       | 16.7054(4) Å                                                     |
| <i>c</i>                                       | 18.3220(4) Å                                                     |
| $\alpha$                                       | 90°                                                              |
| $\beta$                                        | 90°                                                              |
| $\gamma$                                       | 90°                                                              |
| Volume                                         | 1604.91(6) Å <sup>3</sup>                                        |
| <i>Z</i>                                       | 4                                                                |
| Density (calculated)                           | 1.772 Mg/m <sup>3</sup>                                          |
| Absorption coefficient ( $\mu$ )               | 2.01 mm <sup>-1</sup>                                            |
| <i>F</i> (000)                                 | 838.90                                                           |
| Crystal size                                   | 0.43 × 0.35 × 0.28 mm <sup>3</sup>                               |
| Radiation                                      | MoK $\alpha$ ( $\lambda$ = 0.71073)                              |
| Theta range for data collection                | 2.2° to 26.94°                                                   |
| Index ranges                                   | $-7 \leq h \leq 7$ , $-23 \leq k \leq 23$ , $-26 \leq l \leq 26$ |
| Reflections collected                          | 82438                                                            |
| Independent reflections                        | 4912 [ $R_{\text{int}}$ = 0.0494, $R_{\text{sigma}}$ = 0.0195]   |
| Data/restraints/parameters                     | 4912/0/217                                                       |
| Goodness-of-fit on $F^2$                       | 1.022                                                            |
| Final <i>R</i> indexes [ $I \geq 2\sigma(I)$ ] | $R_1$ = 0.0193, $wR_2$ = 0.0389                                  |
| Final <i>R</i> indexes [all data]              | $R_1$ = 0.0176, $wR_2$ = 0.0395                                  |
| Largest diff. peak and hole                    | 0.29/-0.44 e.Å <sup>-3</sup>                                     |
| Flack parameter                                | 0.000(6)                                                         |

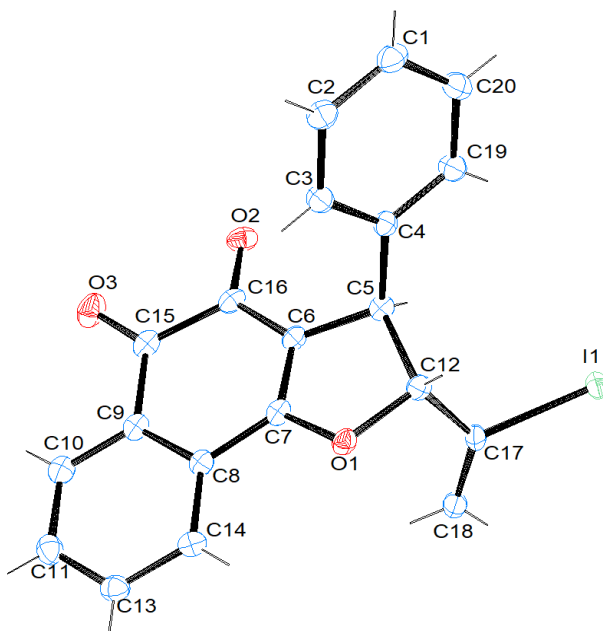

ORTEP representation of the X-ray structure of enantiopure *trans*-**10** (thermal ellipsoids at 30% probability)

## V. Antibacterial Study – Materials and instrumentation:

Bacterial optical density was measured using a ThermoFisher Scientific Microplate Reader. NaCl, KCl, Na<sub>2</sub>HPO<sub>4</sub>, KH<sub>2</sub>PO<sub>4</sub>, nutrient agar powder and Luria Broth (LB) powder were obtained from SRL Chemicals and Hi-Media and used without further purification. Milli-Q water was used for the preparation of the desired solutions. The LB media and PBS buffer were autoclaved at 120 °C before use. For cell viability assay, Dulbecco's modified Eagle medium (DMEM) was obtained from Invitrogen, while Fetal Bovine Serum (FBS) was taken from Cytiva. Dulbecco's PBS (DPBS), Trypsin-EDTA (0.5%, 10X) solution, antibiotic antimycotic solution (100 mM) and glutamax (100 mM) from Gibco (Thermofisher) were used. The MTT (3-[4,5-dimethylthiazole-2-yl]-2,5-diphenyltetrazolium bromide) salt used for the assay was taken from SRL Chemicals. All the reagents were used as obtained, while the solutions were prepared either in DPBS or autoclaved Milli-Q water. The incubation was done in a CO<sub>2</sub> incubator (Sanyo, MCO-18AC, USA). Cell count was obtained on a BioRad TC20 counter using Trypan blue dye. The absorbance@570 nm was recorded on a VARIOSKAN multimode plate reader instrument. DMSO and Acetonitrile used for the study were procured from Finar Ltd. as HPLC grade solvents.

## W. Estimation of MIC and MBC:

The freeze-dried stock of the bacterial species, viz, Methicillin-resistant *Staphylococcus aureus* (MRSA, ATCC USA300) and *Pseudomonas aeruginosa* (PA, ATCC 27853) was taken and revived on nutrient agar plates. To generate the primary culture, a small number of colonies were taken from this plate using a sterile loop and cultured in Luria Broth (LB, 20 g/L) for 10 h approximately. This stock was subsequently used to prepare the secondary culture. In this case, 200  $\mu$ L of the bacterial solution was taken in 1.7 mL of fresh LB. Incubation was done at 37 °C until the mid-log phase (Optical Density, OD<sub>620nm</sub> ~ 0.3) was attained. The OD<sub>620nm</sub> was adjusted to 0.01 ( $10^6$  to  $10^7$  bacteria/ mL) using LB media.

All the compounds under investigation were prepared as a stock in 1:19, acetonitrile/water solution. To determine the MIC (Minimum Inhibitory Concentration), microbroth dilution technique was employed. Phosphate Buffer Saline (PBS, pH = 7.4) was used for two-fold serial dilution of the stock solution in the 96-well plate. 100  $\mu$ L of bacterial suspension (OD<sub>620nm</sub> = 0.01) was added to each well. The bacterial growth curves were recorded on a micro-plate reader at 620 nm. The assay was continued for 16 h while the readings were taken at a time interval of 10 mins (with shaking at 100 rpm in between the readings). Throughout the course of the experiment, the thermostat was set to 37 °C.

The data thus obtained was normalized and plotted by using GraphPad software. The minimum concentration at which there was no growth or at least 95% decline in the growth compared to the control, was designated as the MIC value.

The MBC (Minimum Bactericidal Concentration) was determined as follows. The 96-well plate used for the kinetic growth curve analysis was incubated for 4 h at 37 °C. The solution from the wells were gently streaked on a nutrient agar plate (compartmentalized and labelled suitably) using a sterile soft loop. The plate was kept in an oven at a temperature of 37 °C for 24-48 h. The concentration at which no bacterial colonies were observed was assigned as the MBC.

| Structure                                                                                      | MIC (mg/mL)                                                                                                 | MBC (mg/mL)                                                                                                  |
|------------------------------------------------------------------------------------------------|-------------------------------------------------------------------------------------------------------------|--------------------------------------------------------------------------------------------------------------|
| 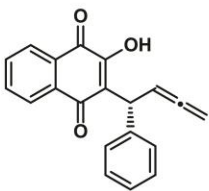 <p>3aa</p>   | 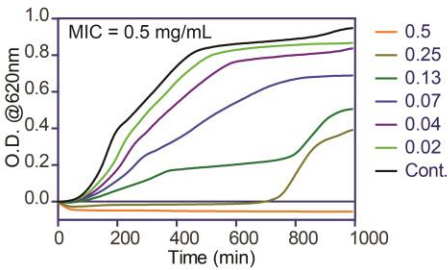 <p>MIC = 0.5 mg/mL</p>    | 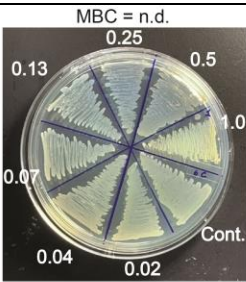 <p>MBC = n.d.</p>        |
| 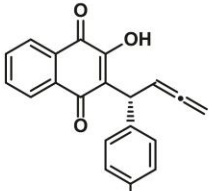 <p>3ad</p>   | 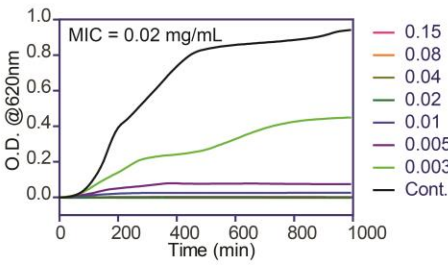 <p>MIC = 0.02 mg/mL</p>   | 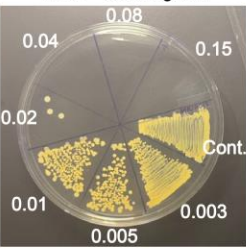 <p>MBC = 0.04 mg/mL</p>  |
| 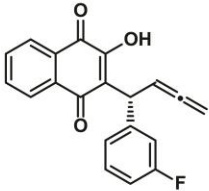 <p>3ah</p>  | 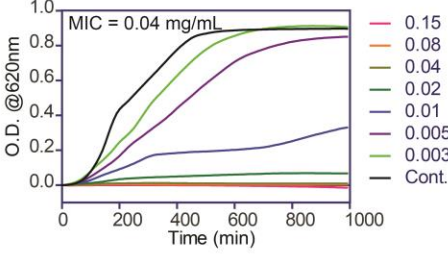 <p>MIC = 0.04 mg/mL</p>  | 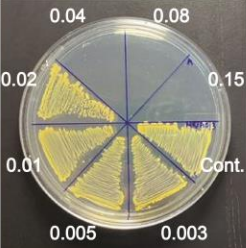 <p>MBC = 0.04 mg/mL</p> |
| 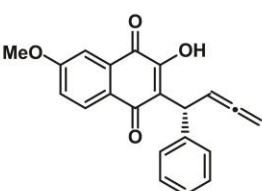 <p>3da</p> | 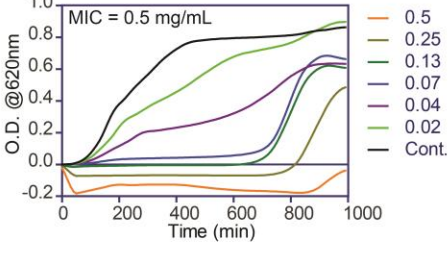 <p>MIC = 0.5 mg/mL</p>  | 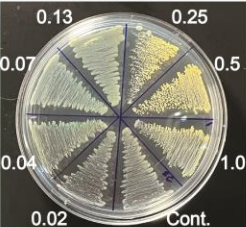 <p>MBC = n.d.</p>      |
| 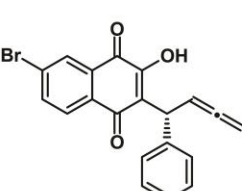 <p>3fa</p> | 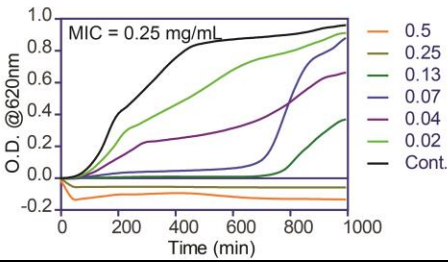 <p>MIC = 0.25 mg/mL</p> | 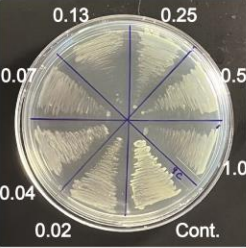 <p>MBC = n.d.</p>      |

| Structure                                                                                          | MIC (mg/mL)                                                                                                    | MBC (mg/mL)                                                                                                   |
|----------------------------------------------------------------------------------------------------|----------------------------------------------------------------------------------------------------------------|---------------------------------------------------------------------------------------------------------------|
| 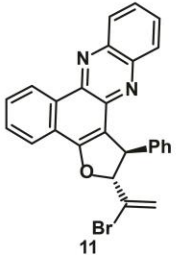 <p>11</p>        | 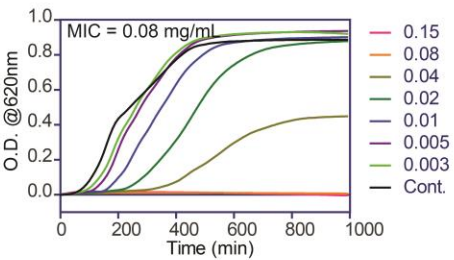 <p>MIC = 0.08 mg/mL</p>     | 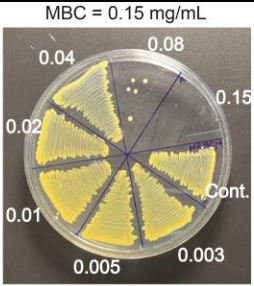 <p>MBC = 0.15 mg/mL</p>   |
| 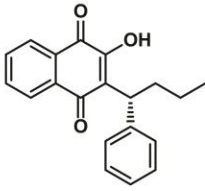 <p>12a</p>       | 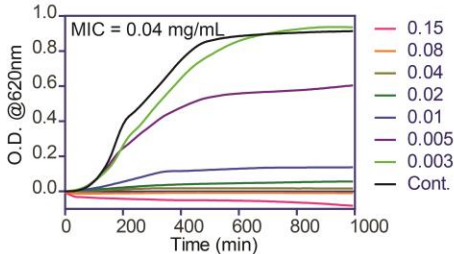 <p>MIC = 0.04 mg/mL</p>     | 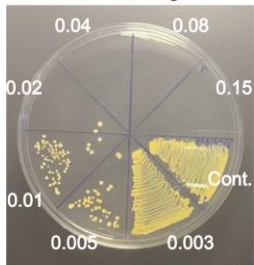 <p>MBC = 0.04 mg/mL</p>   |
| 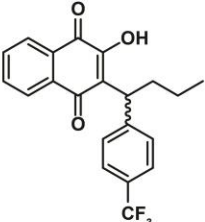 <p>rac-12b</p>  | 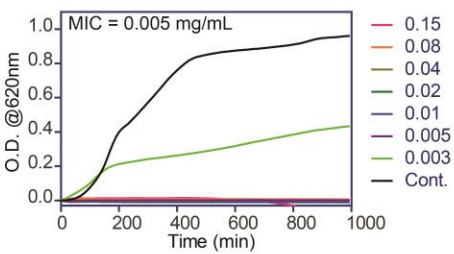 <p>MIC = 0.005 mg/mL</p>   | 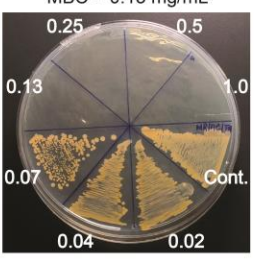 <p>MBC = 0.13 mg/mL</p>  |
| 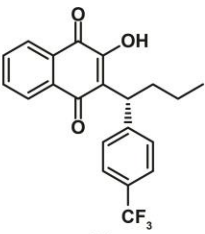 <p>12b</p>     | 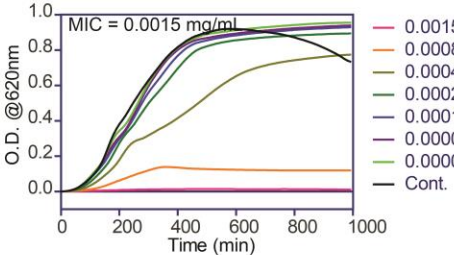 <p>MIC = 0.0015 mg/mL</p> | 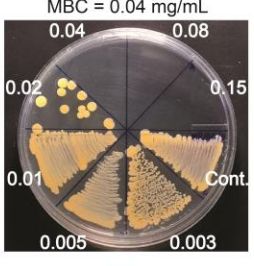 <p>MBC = 0.04 mg/mL</p> |
| 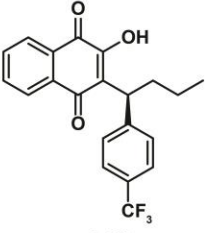 <p>ent-12b</p> | 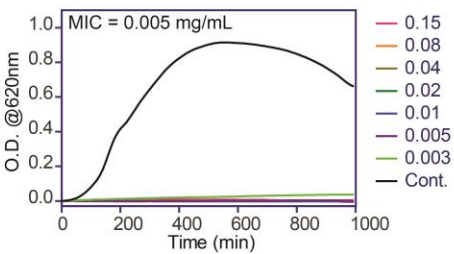 <p>MIC = 0.005 mg/mL</p>  | 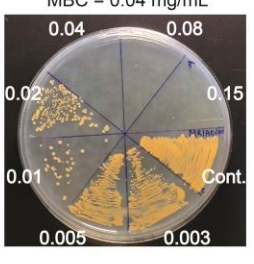 <p>MBC = 0.04 mg/mL</p> |

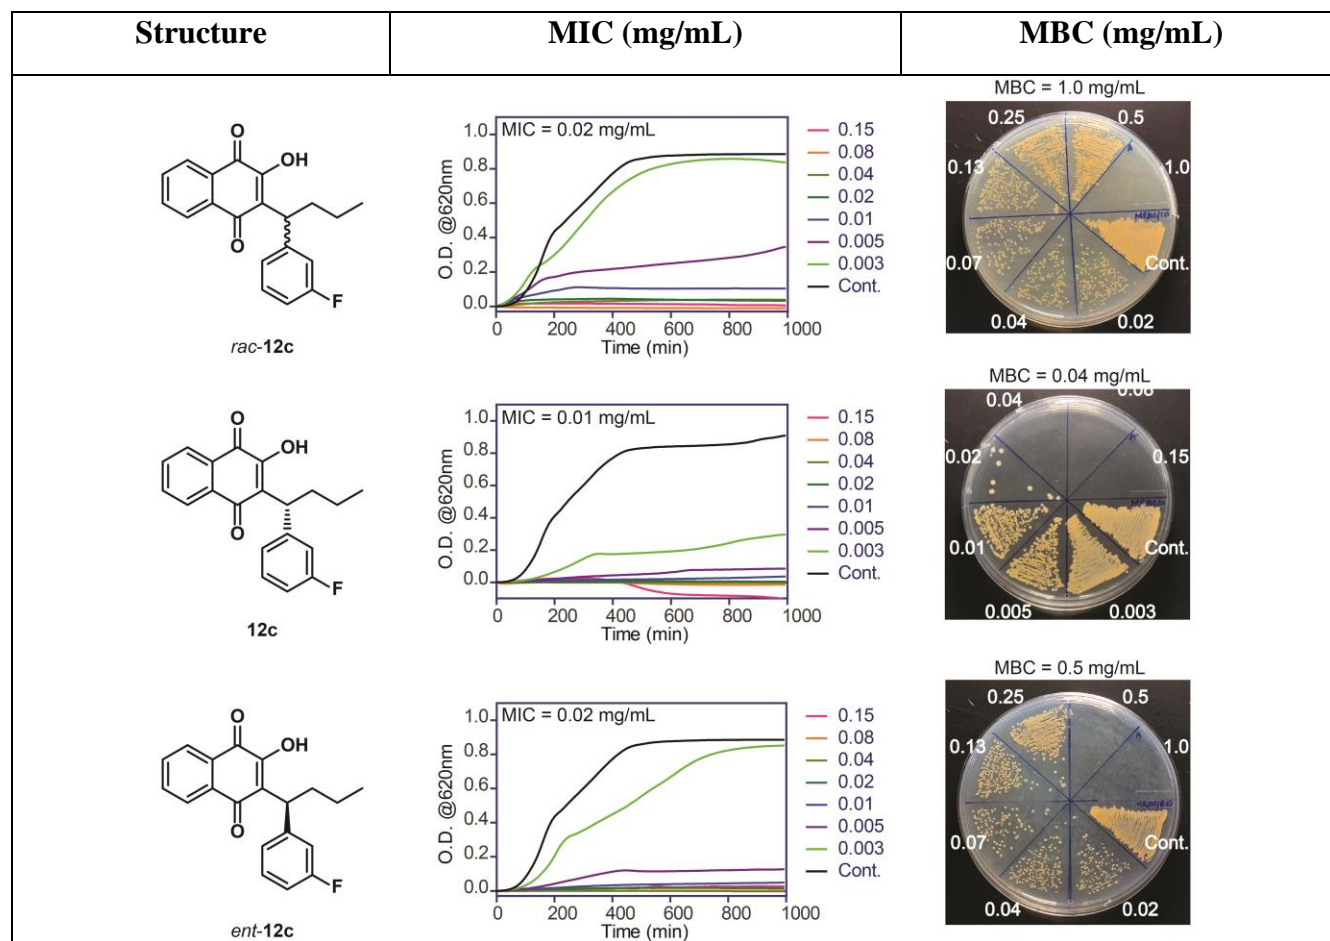

**Figure S1:** Schematic representation of the bacteriostatic and bactericidal properties of the  $\beta$ -allenylc 2-hydroxy naphthoquinones, their hydrogenated analogs and the opposite enantiomer against MRSA (all concentrations have been expressed as mg/mL).

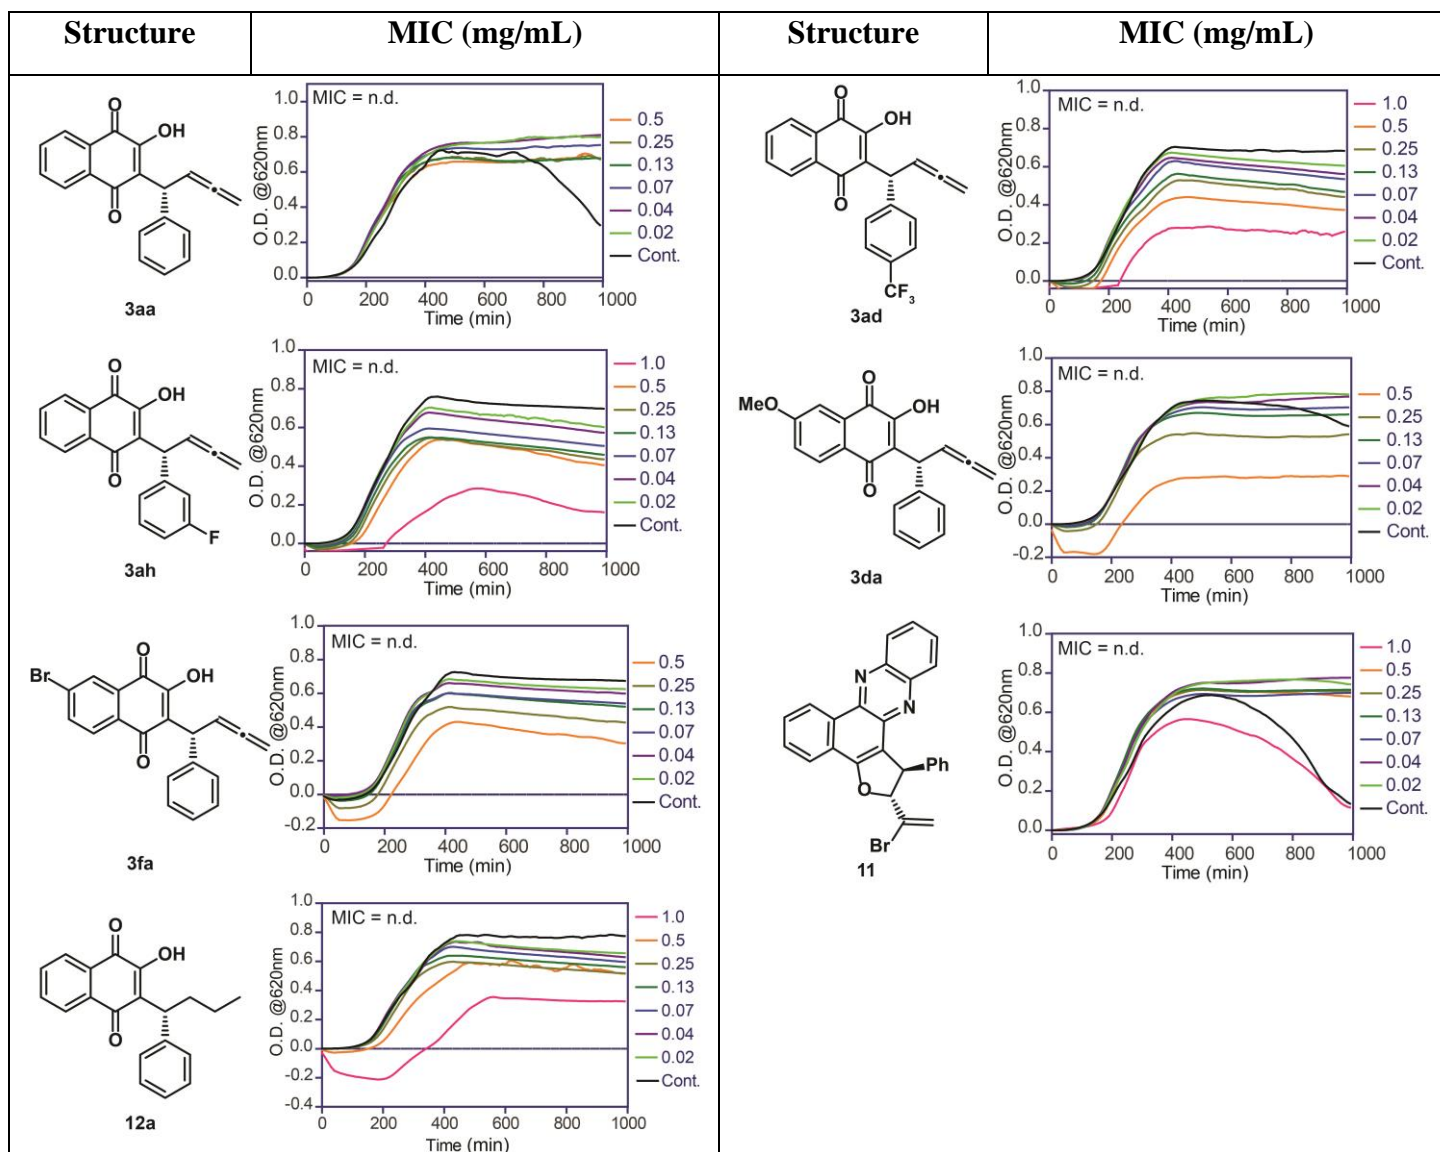

**Figure S2:** Schematic representation of the bacteriostatic properties of the  $\beta$ -allenlyc 2-hydroxy naphthoquinones and their hydrogenated analogs against PA (all concentrations have been expressed as mg/mL).

### X. Cell viability assay:

For assessing the toxicity of the compounds, two cell lines were chosen, *viz*, HEK (human embryonic kidney ATCC 293) and HeLa (human cervical cancer cells). The cells were revived from the cryo-preserved stocks using freshly prepared media comprising of DMEM, 20% FBS, 1% antibiotic antimycotic solution and 2 mM L-glutamine. The culture was done in the CO<sub>2</sub> incubator maintained at 37 °C, 95% humidity, and 5% CO<sub>2</sub> levels. As the cells attained a confluency greater than 90%, they

were detached from the surface of the flask using 0.05% Trypsin–EDTA solution. Subsequently, this solution was centrifuged at 1,800 rpm for 5 mins at 4 °C to precipitate the cells as a pellet. The supernatant was discarded carefully, and the cells were re-suspended in 1 mL of media. The cell count was obtained using a 1:1 mixture of the freshly suspended cells and trypan blue dye solution. In a sterile 96-well plate, ~15,000 cells were seeded in each well and incubated for 24 h in fresh media. The adhered cells were treated with the compound (multiple concentrations taken relative to the MIC; for each concentration, a triplicate set was prepared) for 24 h, following which, the MTT assay was performed. The media was carefully removed, and the cells were washed with DPBS. Following this, fresh media, containing 20% MTT@DPBS was added to all the wells and incubated for 4 h. Then, this solution was taken out and the residual formazan crystals were solubilized in DMSO (over 3 h). Finally, the absorbance at 570 nm was measured to obtain the relative cell viability.

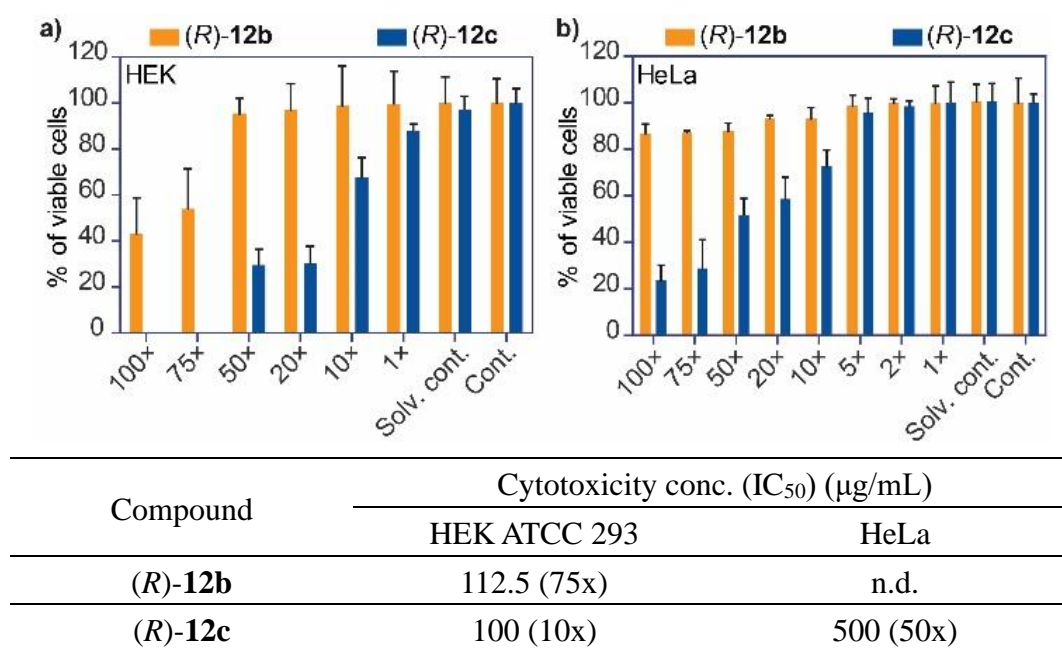

**Figure S3.** Dose-dependent cellular toxicity analysis of (R)-12b and (R)-12c based on MTT assay on mammalian cell lines: a) HEK cells and b) HeLa cells. All experiments were performed in triplicates.

## SUPPORTING INFORMATION: PART B

### **Rational design of naphthoquinone-based antibacterial agents through iridium-catalyzed enantioselective $\beta$ -allylation of 2-hydroxynaphthoquinones**

Aditya Chakrabarty, Komal Jaiswal, Mrinmoy De\* and Santanu Mukherjee\*

*Department of Organic Chemistry, Indian Institute of Science, Bangalore 560 012, INDIA*

\*Corresponding author: E-mail: [sm@iisc.ac.in](mailto:sm@iisc.ac.in) and [md@iisc.ac.in](mailto:md@iisc.ac.in)

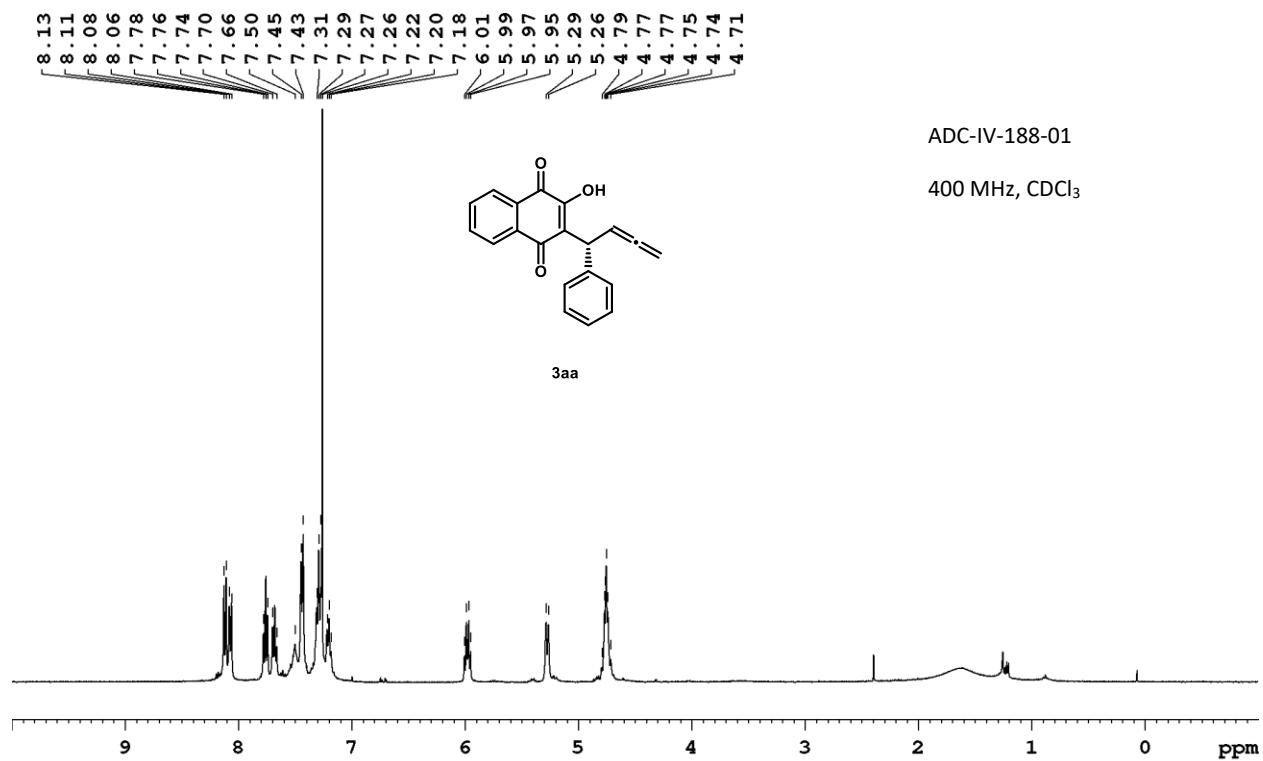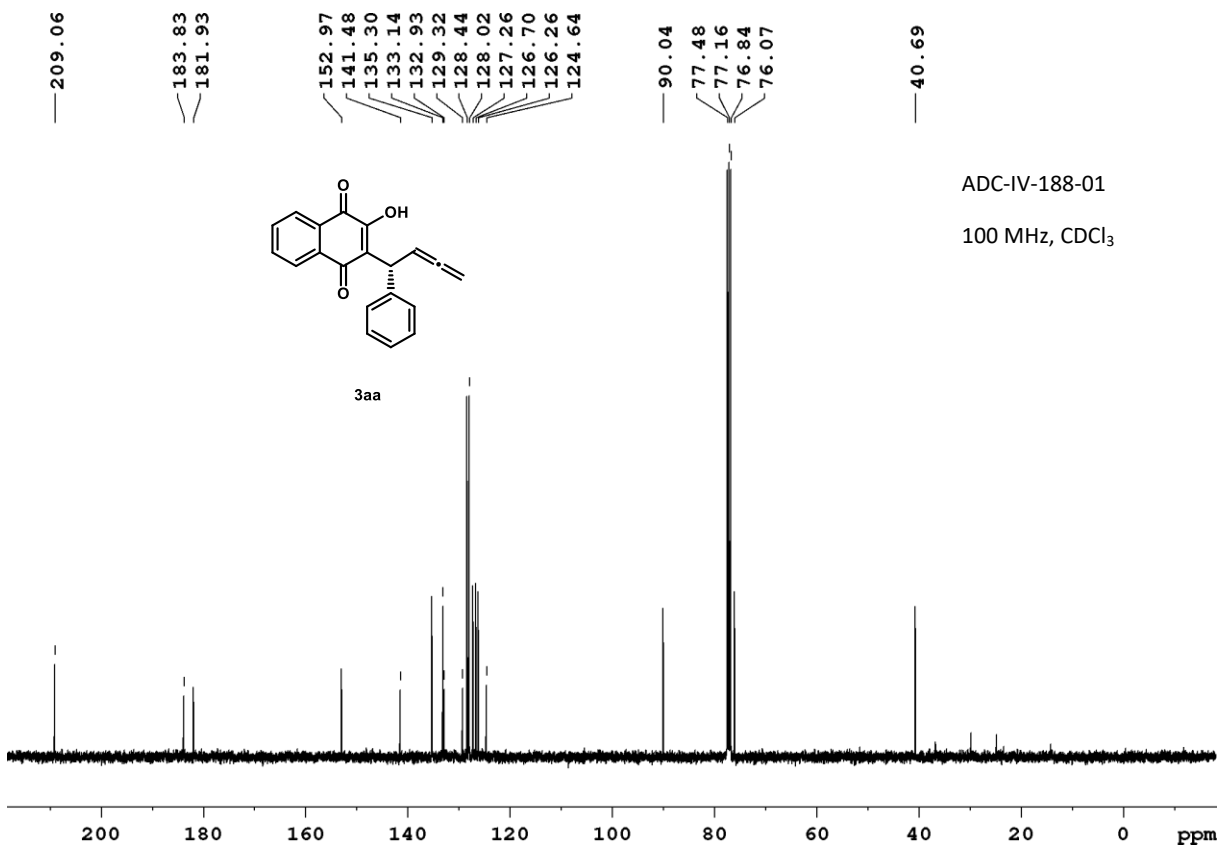

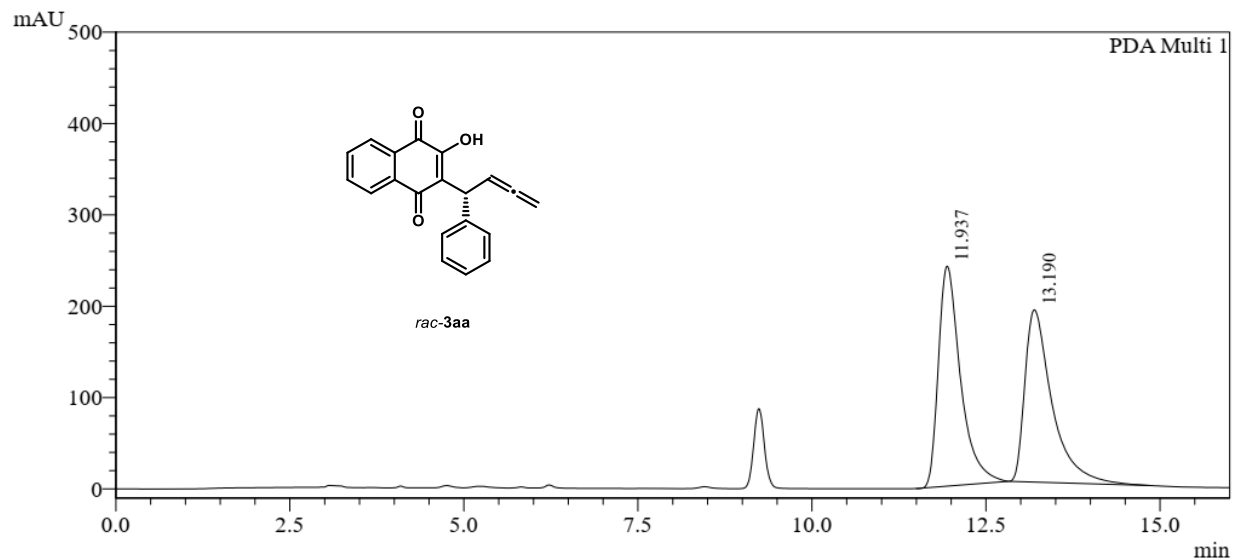

PeakTable

PDA Ch1 241nm 4nm

| Peak# | Ret. Time | Area     | Area %  |
|-------|-----------|----------|---------|
| 1     | 11.937    | 5331576  | 50.942  |
| 2     | 13.190    | 5134483  | 49.058  |
| Total |           | 10466059 | 100.000 |

Daicel Chiralpak IG column (90:10 *n*-Hexane/IPA, 1.0 mL/min, 20 °C)

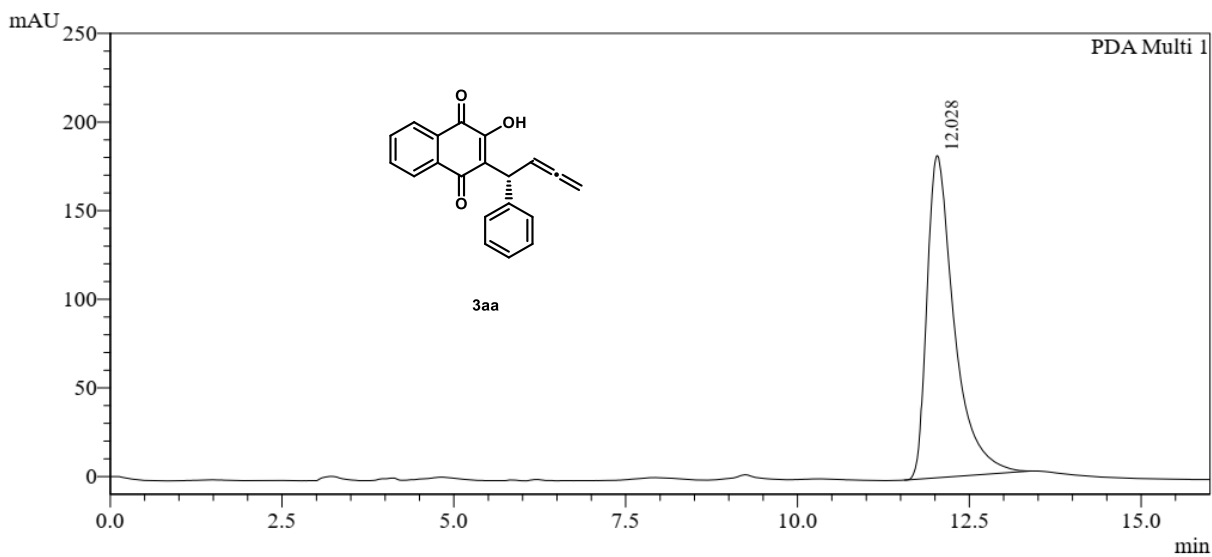

PeakTable

PDA Ch1 241nm 4nm

| Peak# | Ret. Time | Area    | Area %  |
|-------|-----------|---------|---------|
| 1     | 12.028    | 5038336 | 100.000 |
| Total |           | 5038336 | 100.000 |

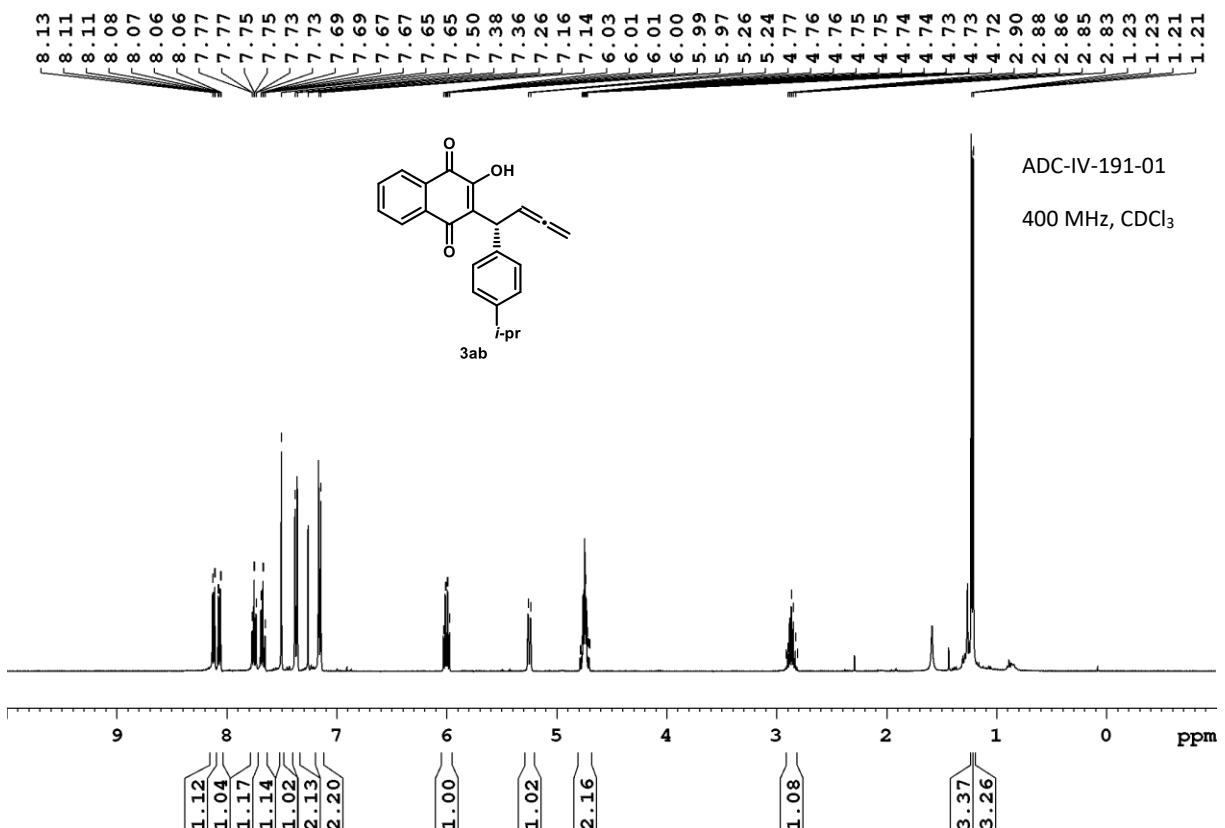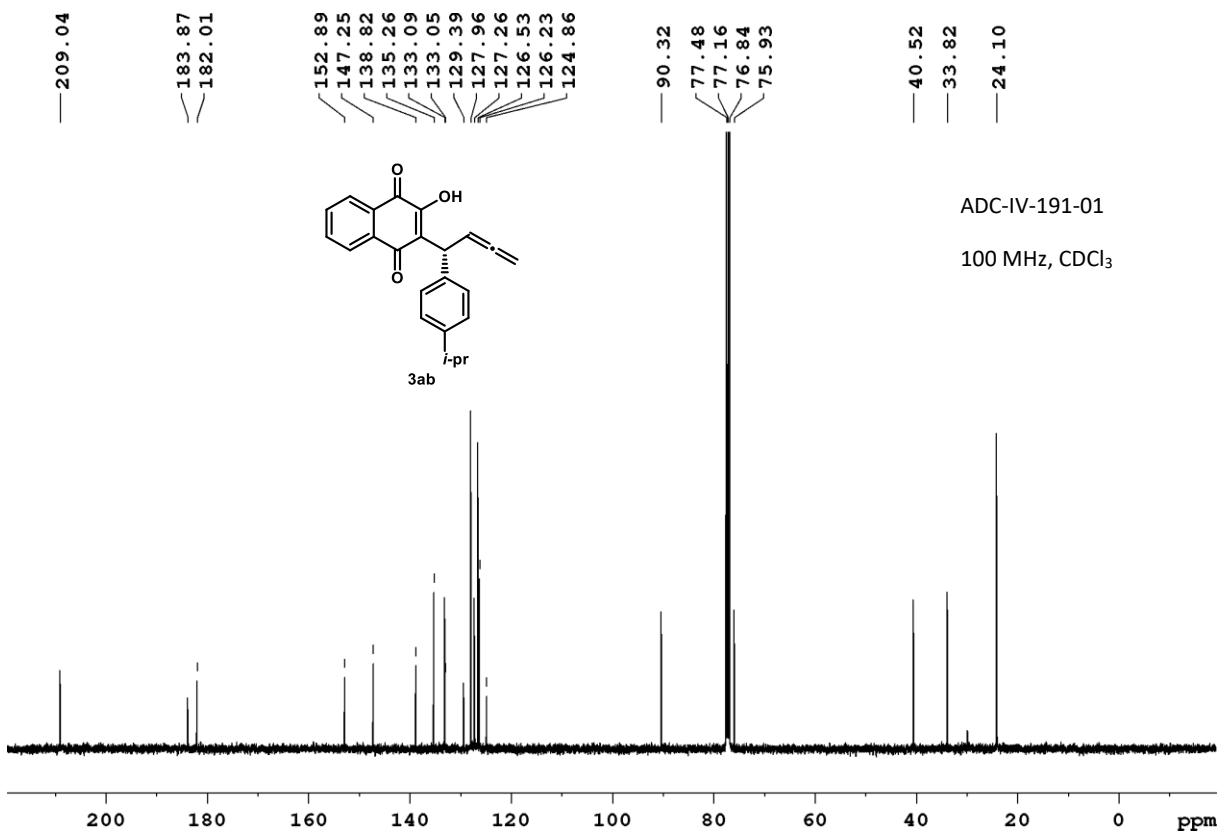

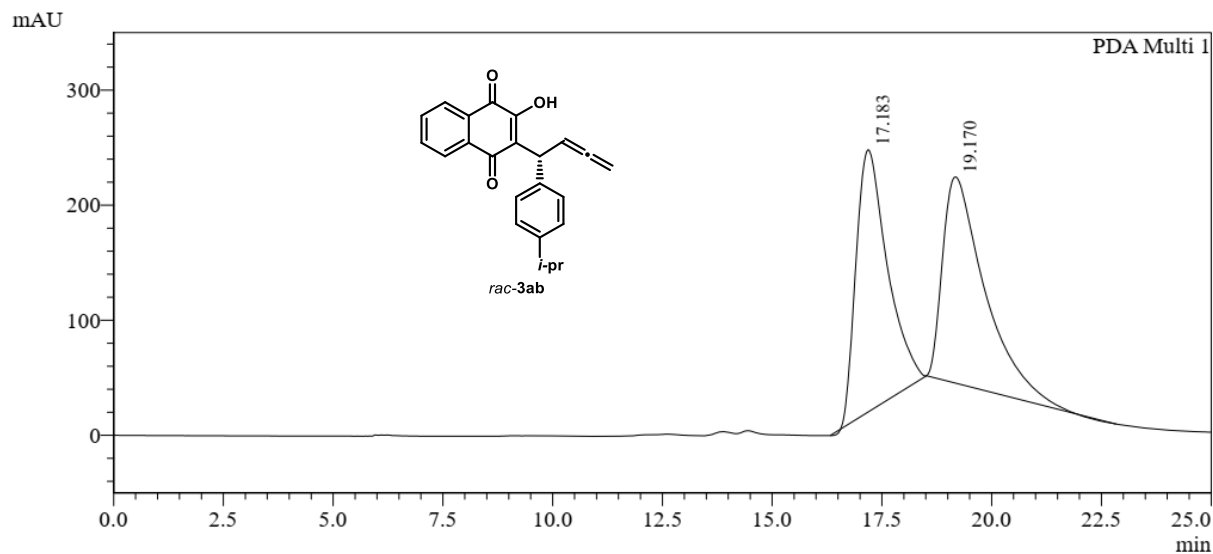

PeakTable

PDA Ch1 260nm 4nm

| Peak# | Ret. Time | Area     | Area %  |
|-------|-----------|----------|---------|
| 1     | 17.183    | 11316209 | 48.504  |
| 2     | 19.170    | 12014378 | 51.496  |
| Total |           | 23330586 | 100.000 |

Daicel Chiralpak AS-H column (90:10 *n*-Hexane/IPA, 0.5 mL/min, 20 °C)

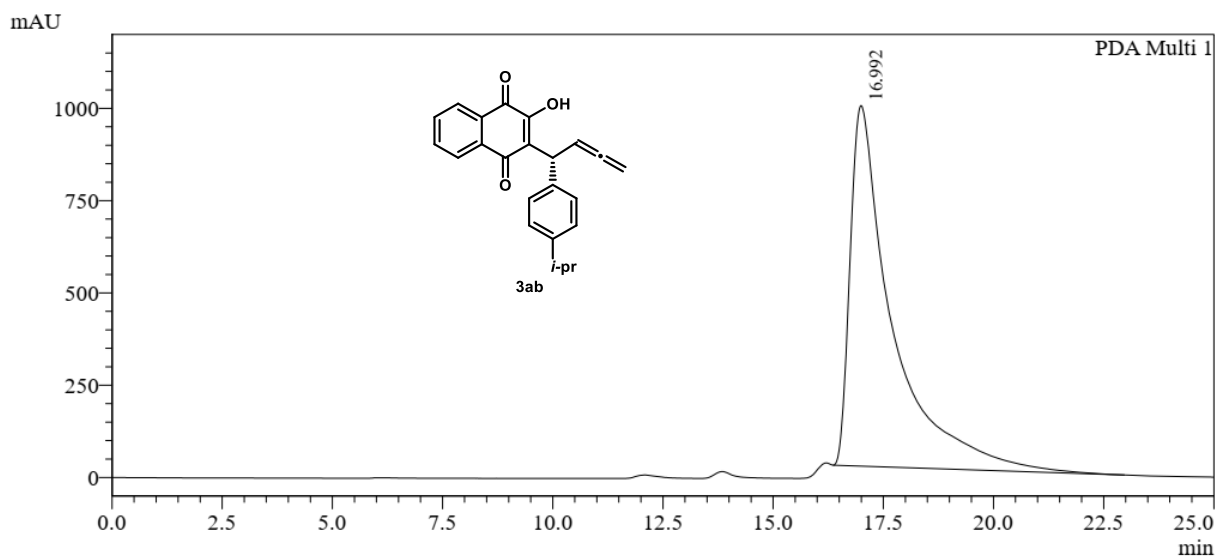

PeakTable

PDA Ch1 260nm 4nm

| Peak# | Ret. Time | Area     | Area %  |
|-------|-----------|----------|---------|
| 1     | 16.992    | 64969100 | 100.000 |
| Total |           | 64969100 | 100.000 |

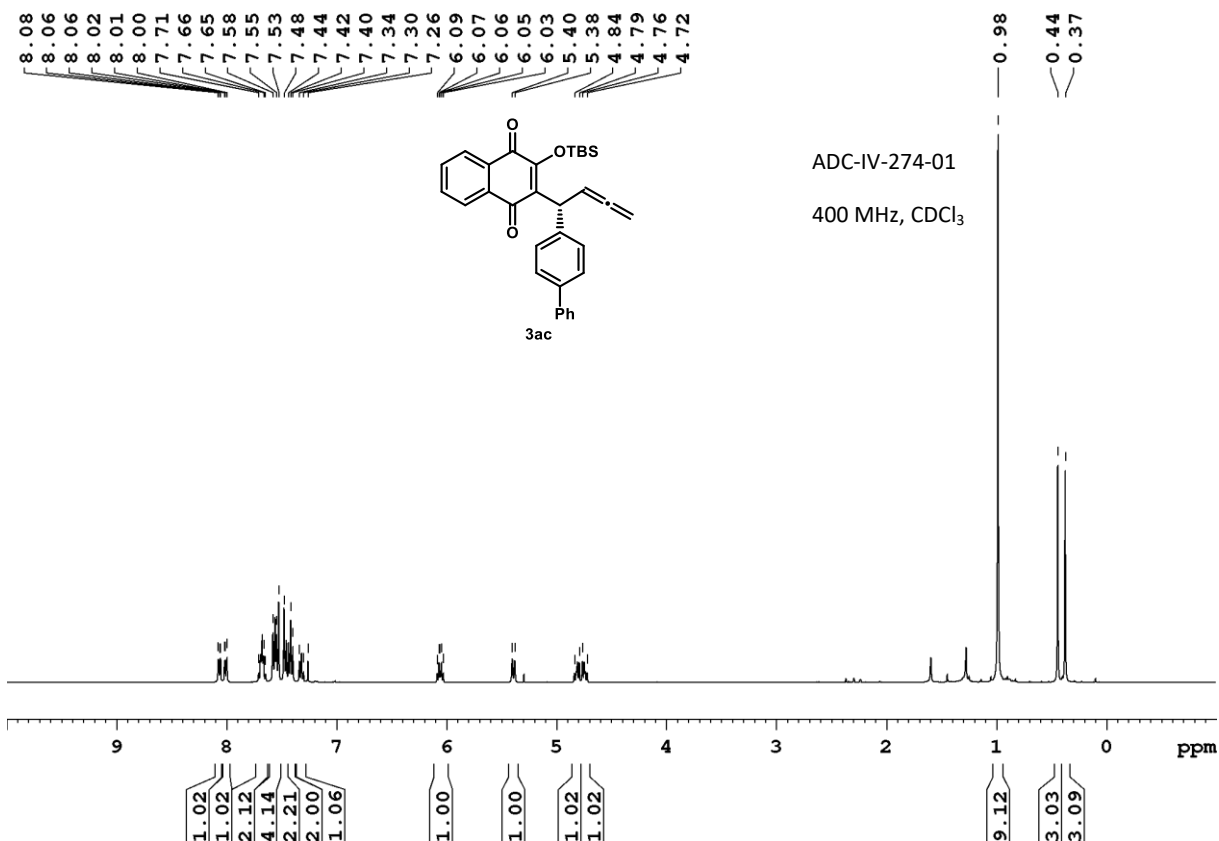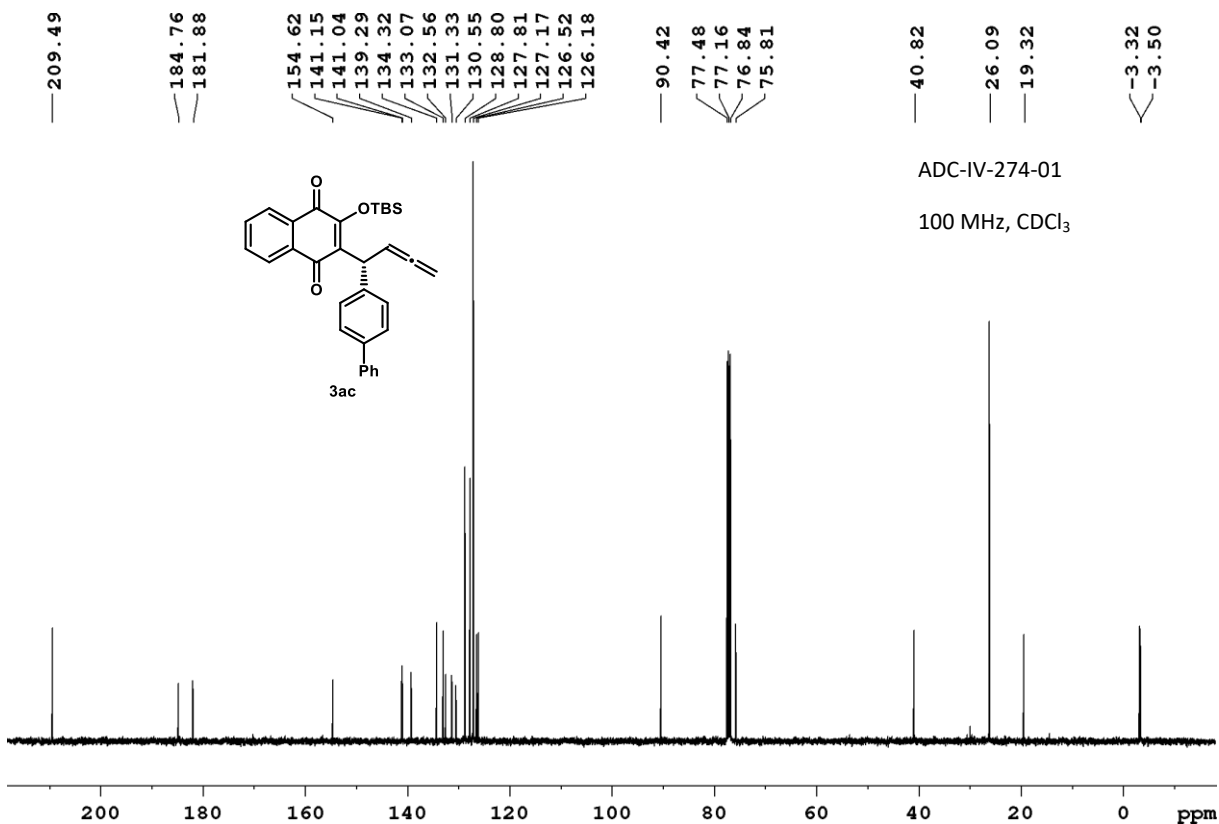

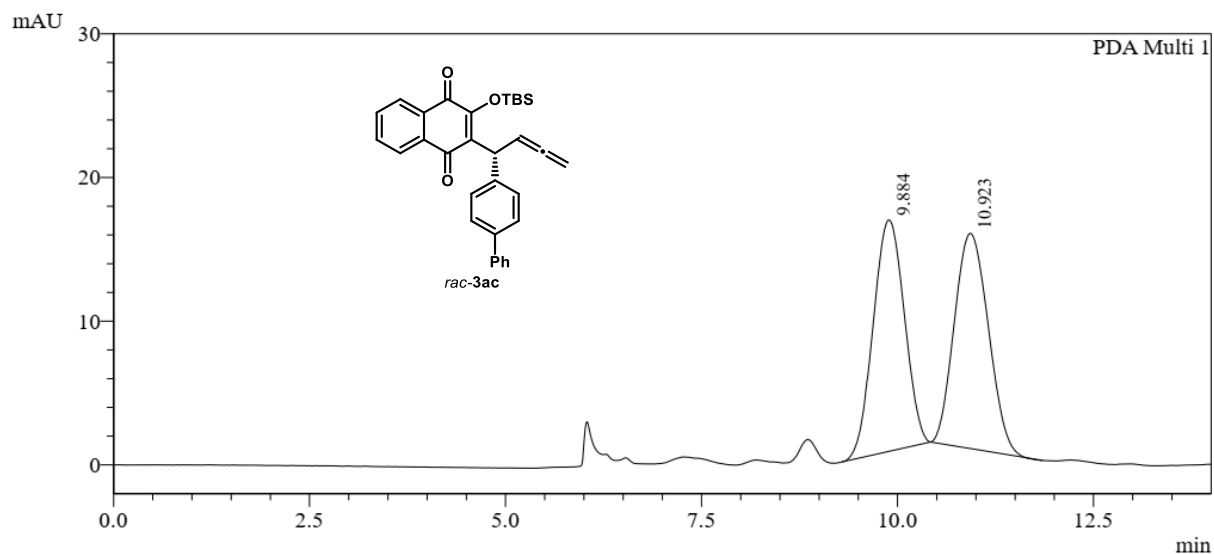

PeakTable

PDA Ch1 263nm 4nm

| Peak# | Ret. Time | Area   | Area %  |
|-------|-----------|--------|---------|
| 1     | 9.884     | 445059 | 49.668  |
| 2     | 10.923    | 451015 | 50.332  |
| Total |           | 896075 | 100.000 |

Phenomenex Cellulose-2 column (99:1 *n*-Hexane/IPA, 0.5 mL/min, 20 °C)

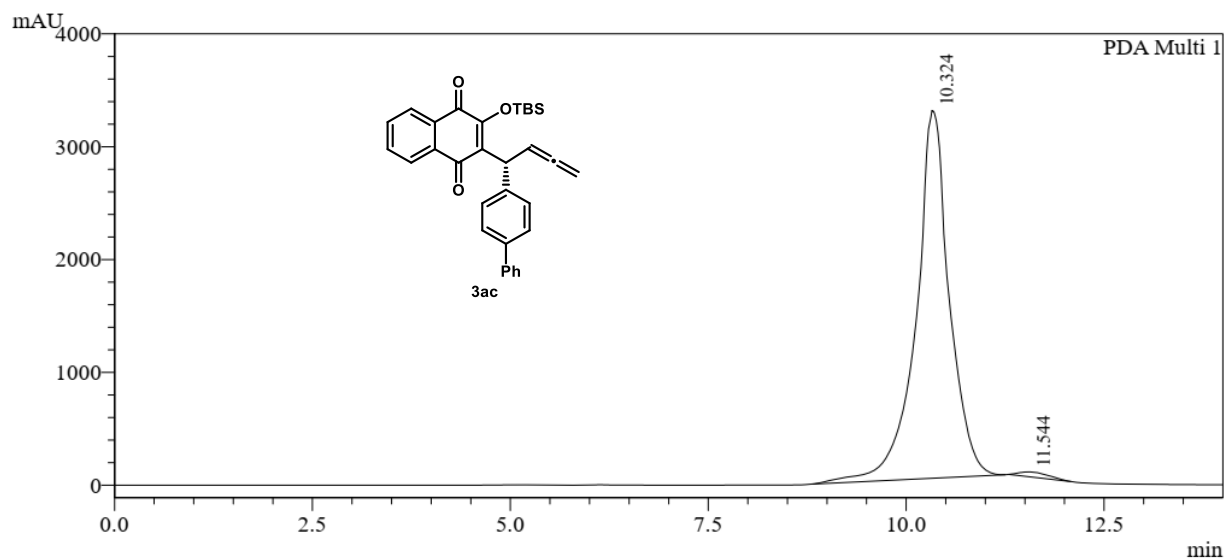

PeakTable

PDA Ch1 263nm 4nm

| Peak# | Ret. Time | Area     | Area %  |
|-------|-----------|----------|---------|
| 1     | 10.324    | 95652623 | 98.791  |
| 2     | 11.544    | 1170996  | 1.209   |
| Total |           | 96823619 | 100.000 |

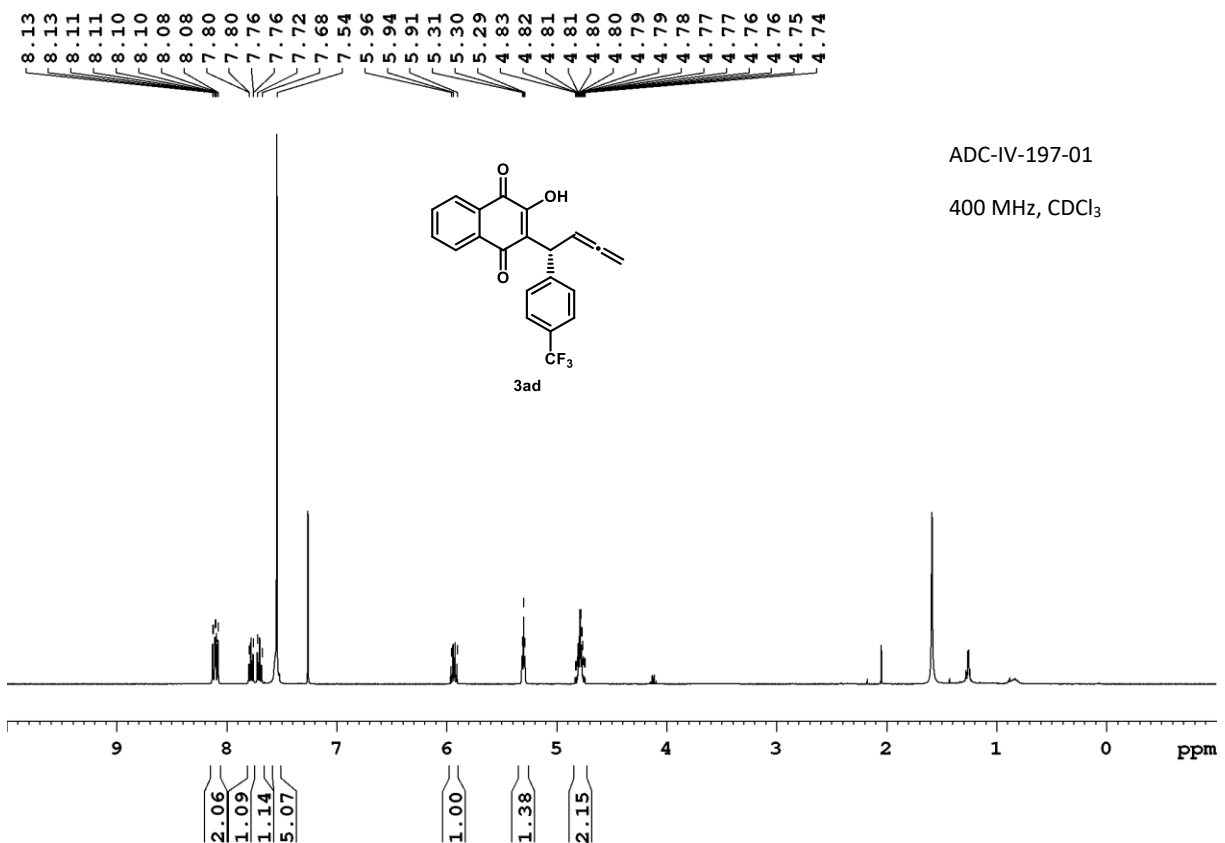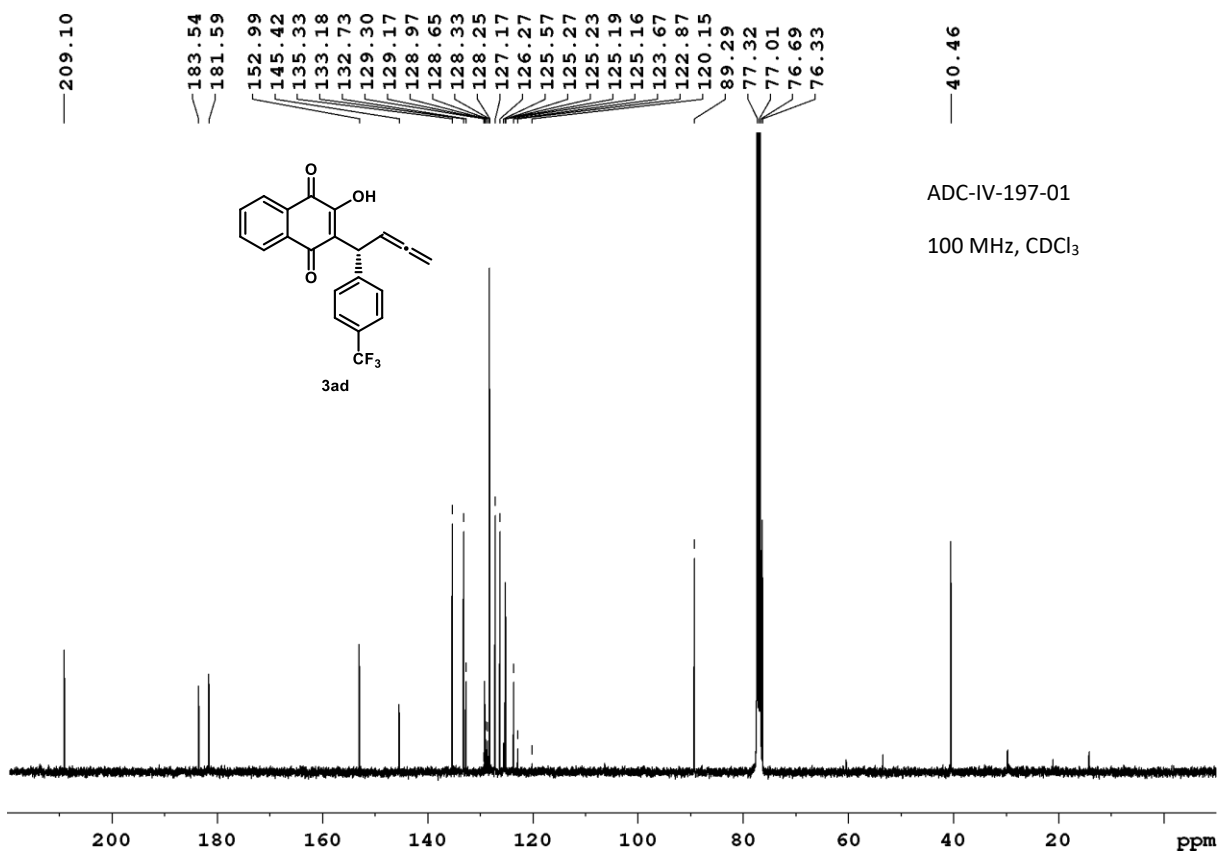

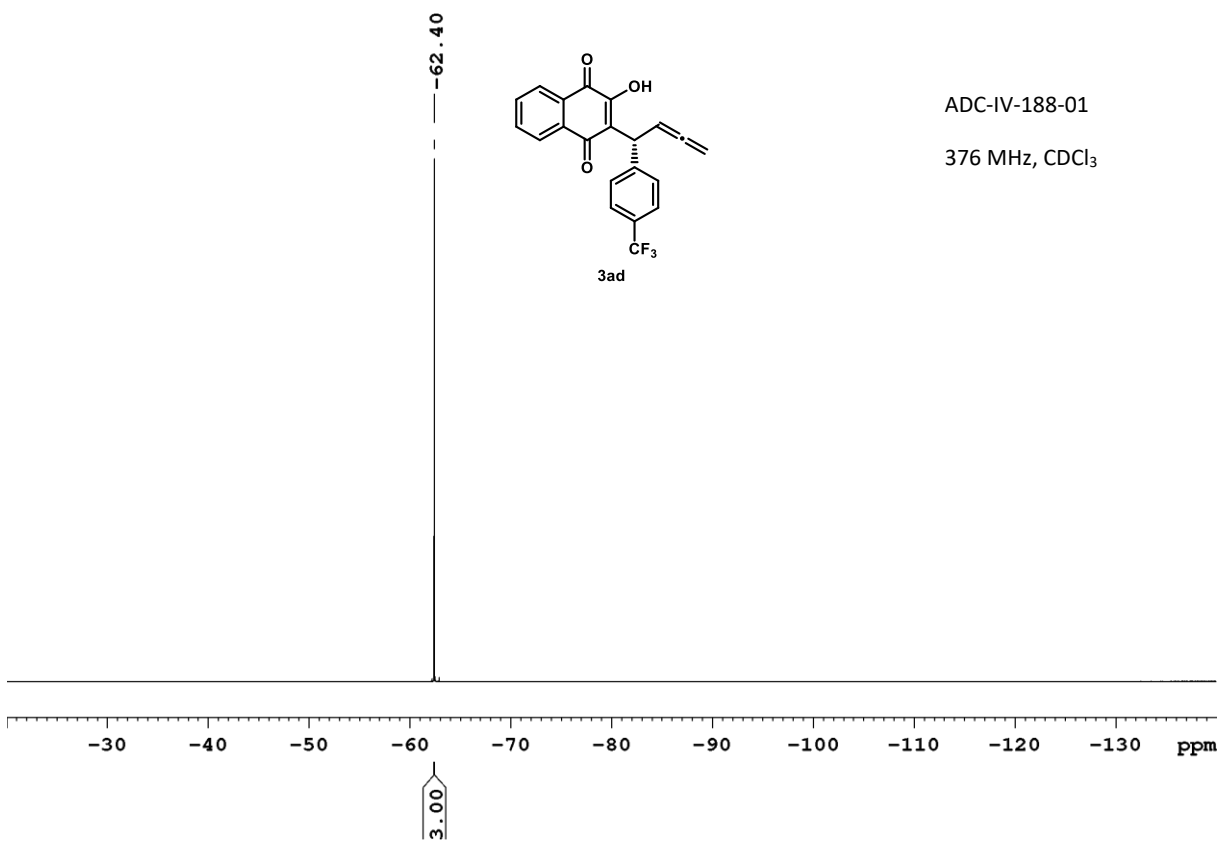

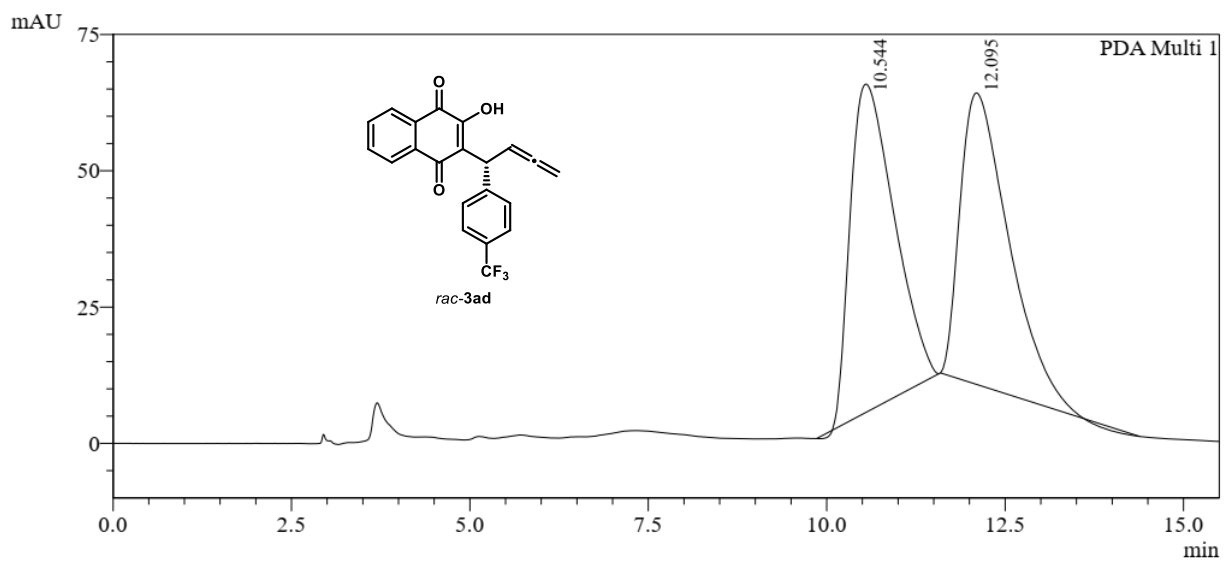

PeakTable

PDA Ch1 269nm 4nm

| Peak# | Ret. Time | Area    | Area %  |
|-------|-----------|---------|---------|
| 1     | 10.544    | 2574865 | 50.344  |
| 2     | 12.095    | 2539673 | 49.656  |
| Total |           | 5114538 | 100.000 |

Daicel Chiralpak AD-H column (90:10 *n*-Hexane/IPA, 1.0 mL/min, 20 °C)

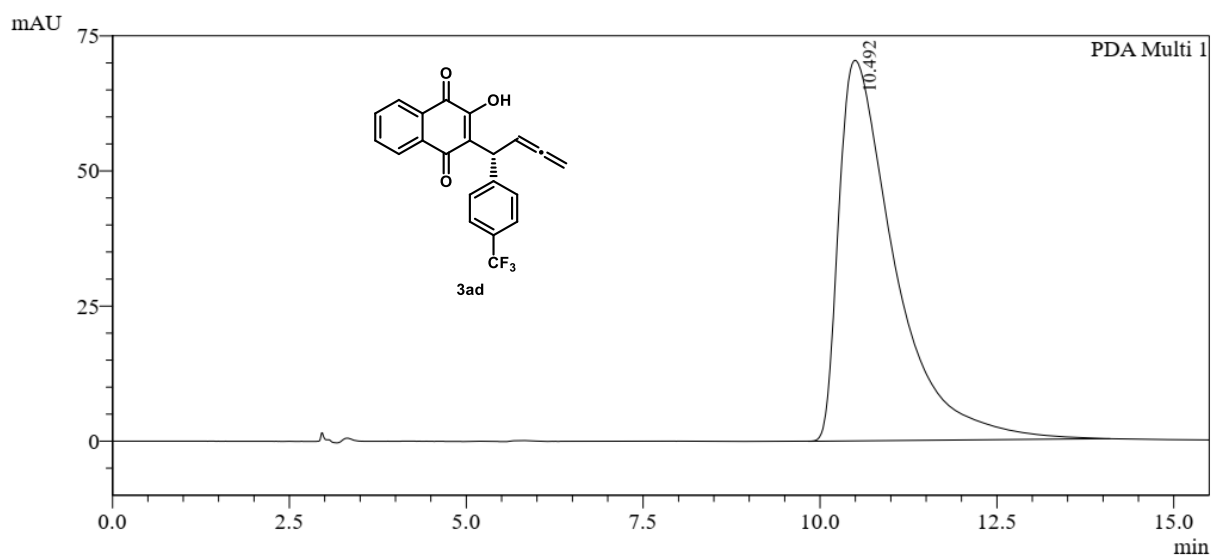

PeakTable

PDA Ch1 269nm 4nm

| Peak# | Ret. Time | Area    | Area %  |
|-------|-----------|---------|---------|
| 1     | 10.492    | 3874841 | 100.000 |
| Total |           | 3874841 | 100.000 |

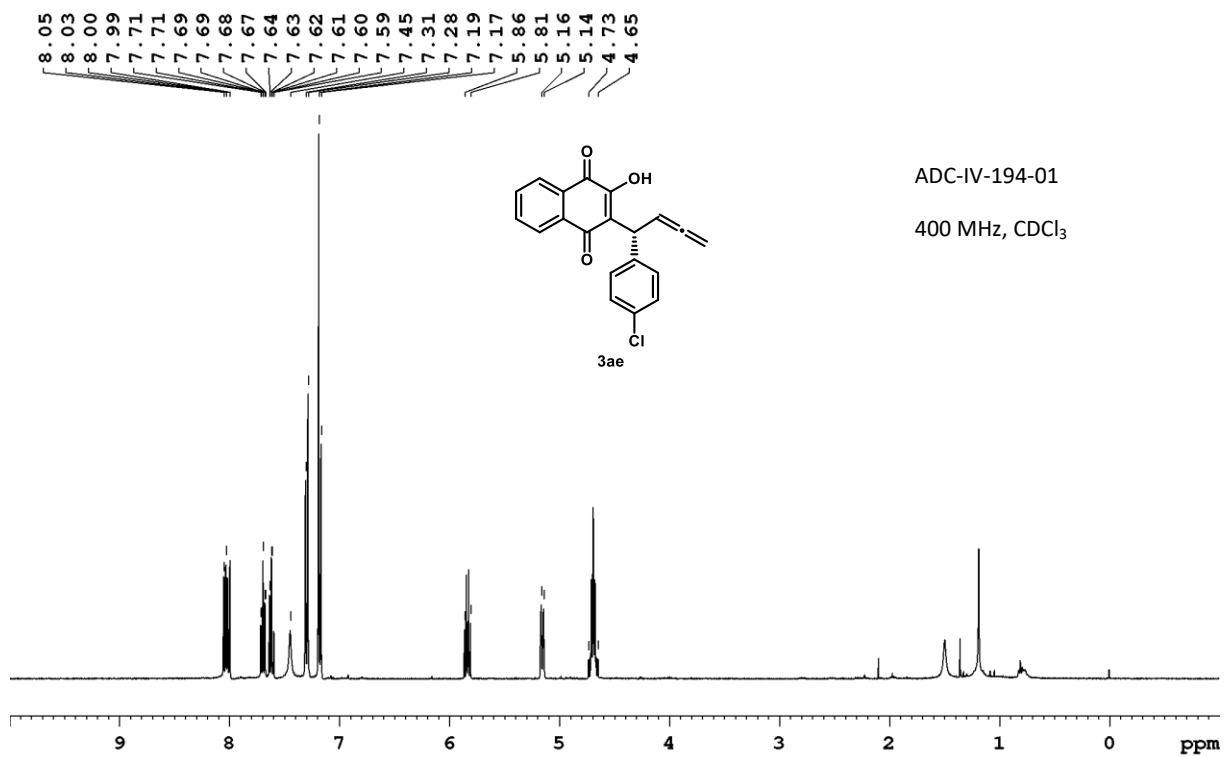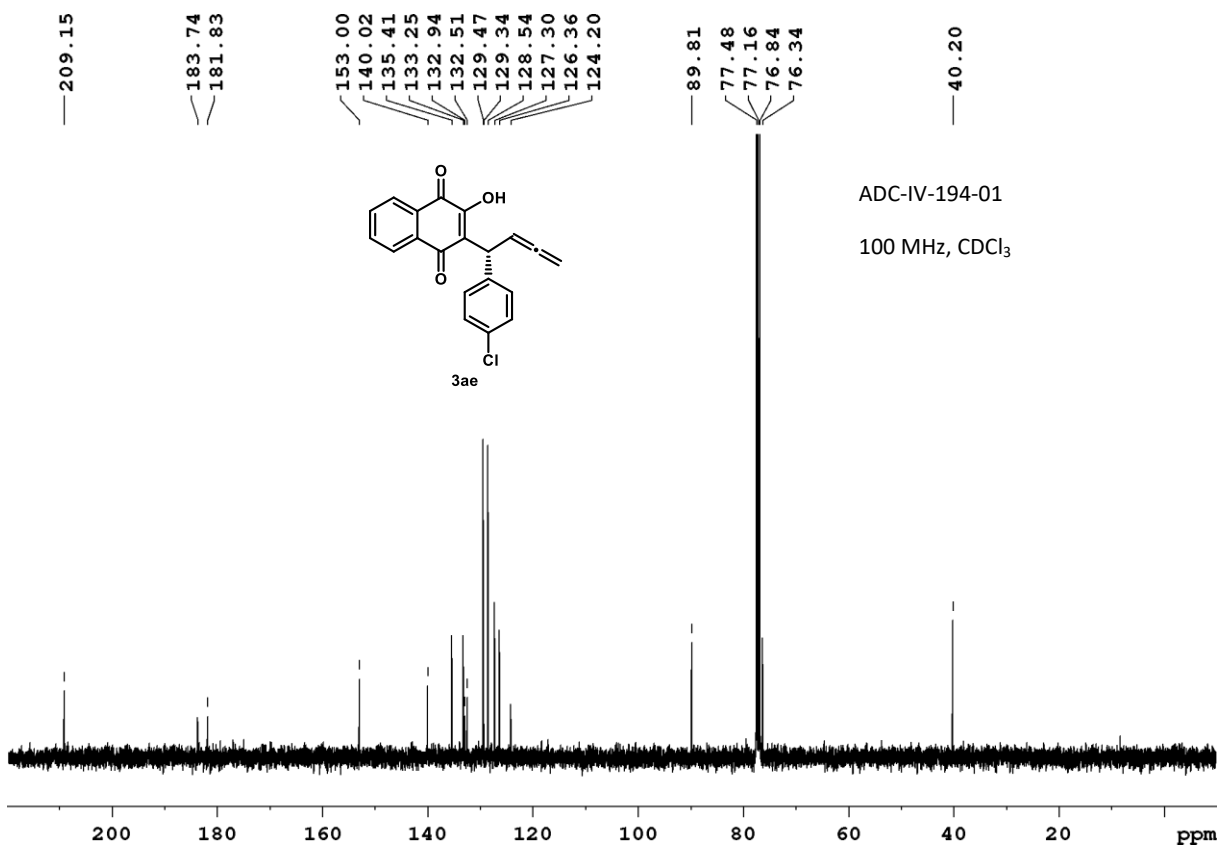

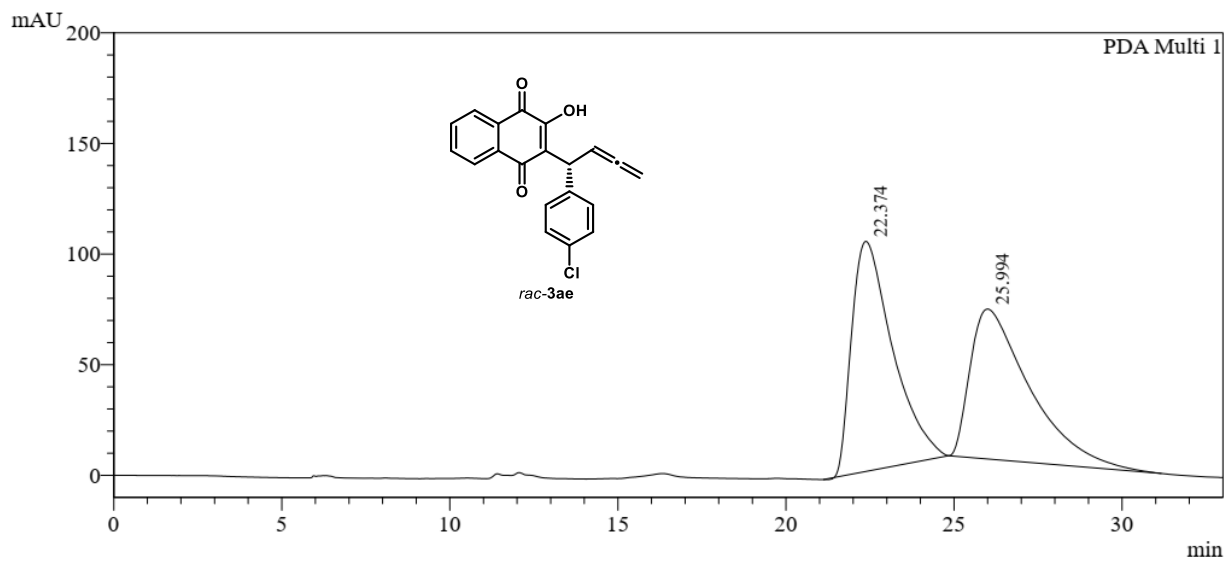

PeakTable

PDA Ch1 241nm 4nm

| Peak# | Ret. Time | Area     | Area %  |
|-------|-----------|----------|---------|
| 1     | 22.374    | 8825292  | 51.310  |
| 2     | 25.994    | 8374509  | 48.690  |
| Total |           | 17199800 | 100.000 |

Daicel Chiralpak IG column (90:10 *n*-Hexane/IPA, 0.5 mL/min, 20 °C)

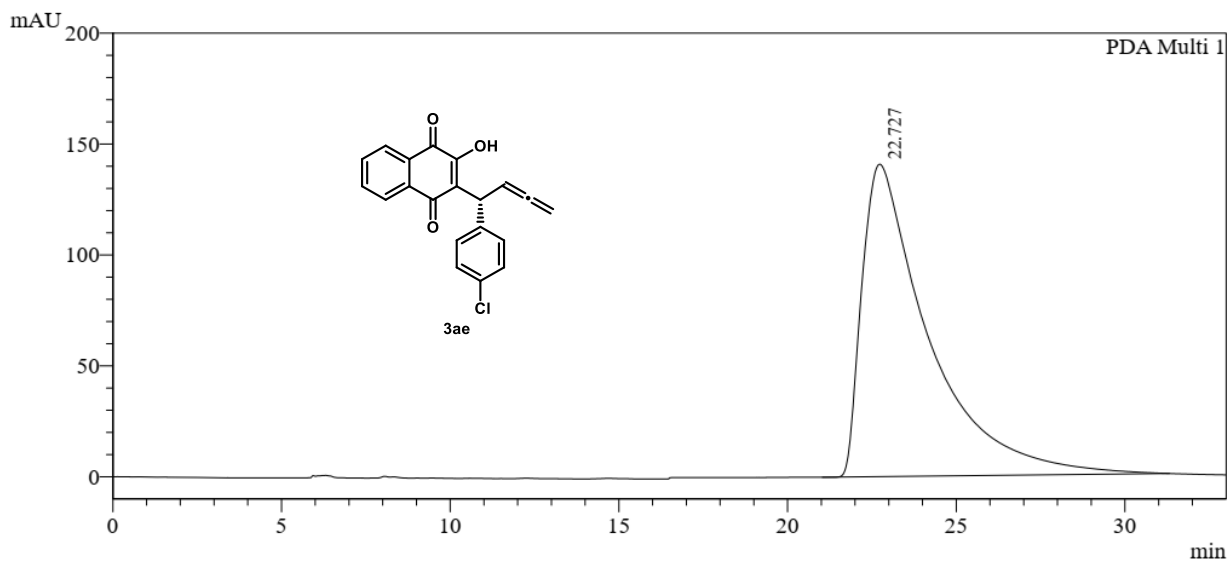

PeakTable

PDA Ch1 241nm 4nm

| Peak# | Ret. Time | Area     | Area %  |
|-------|-----------|----------|---------|
| 1     | 22.727    | 19376672 | 100.000 |
| Total |           | 19376672 | 100.000 |

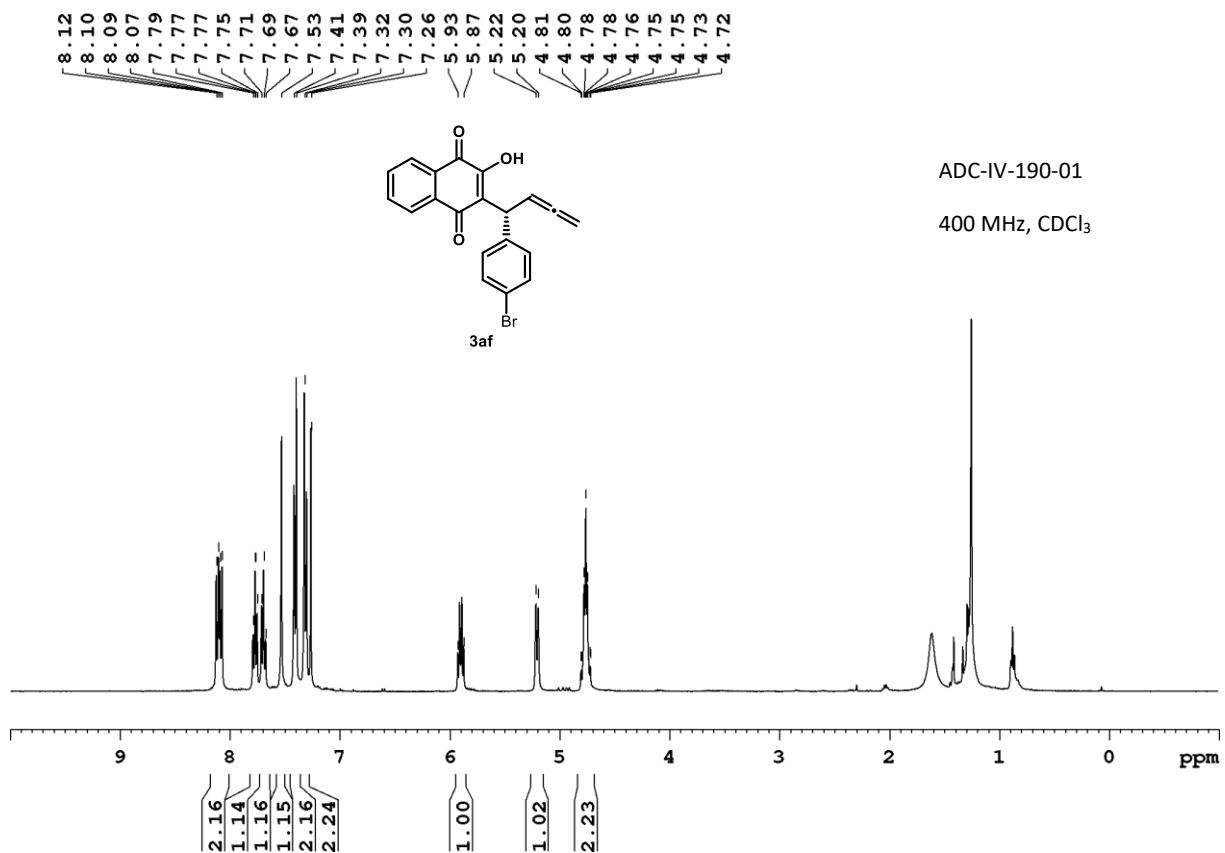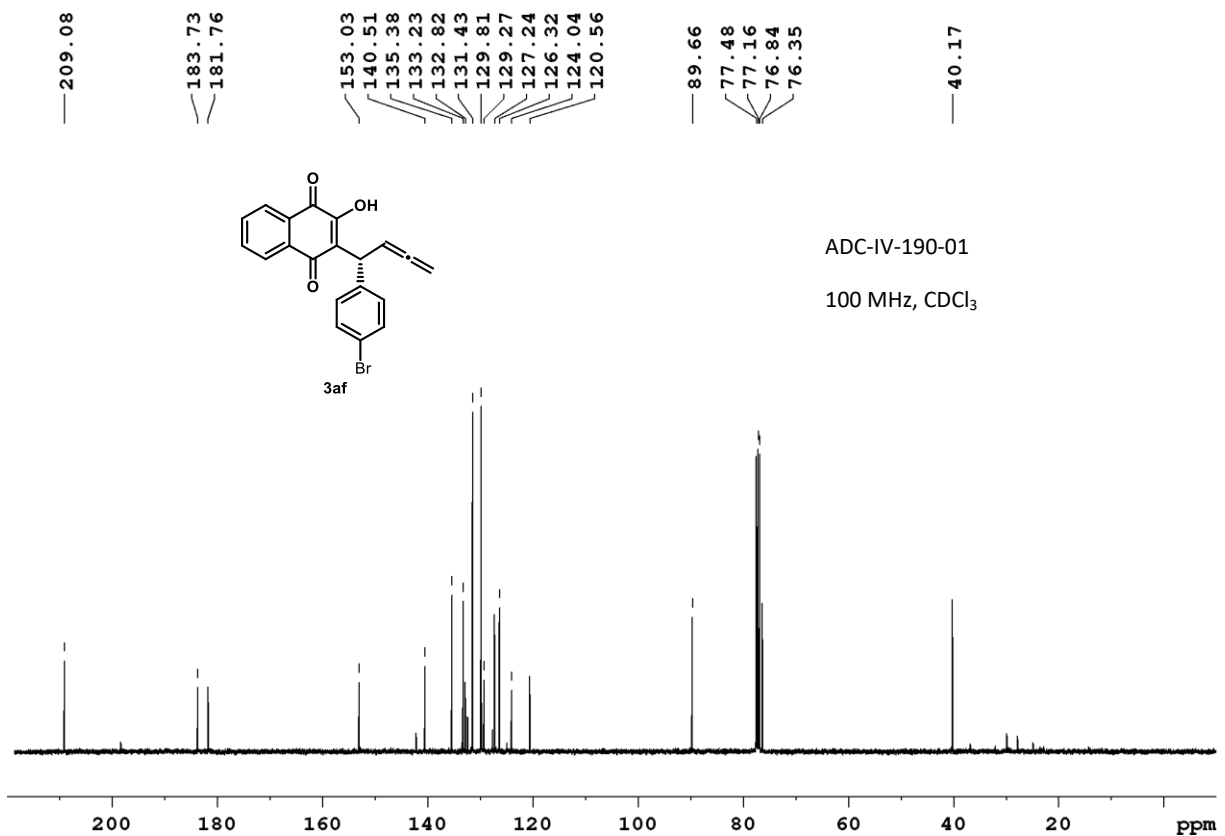

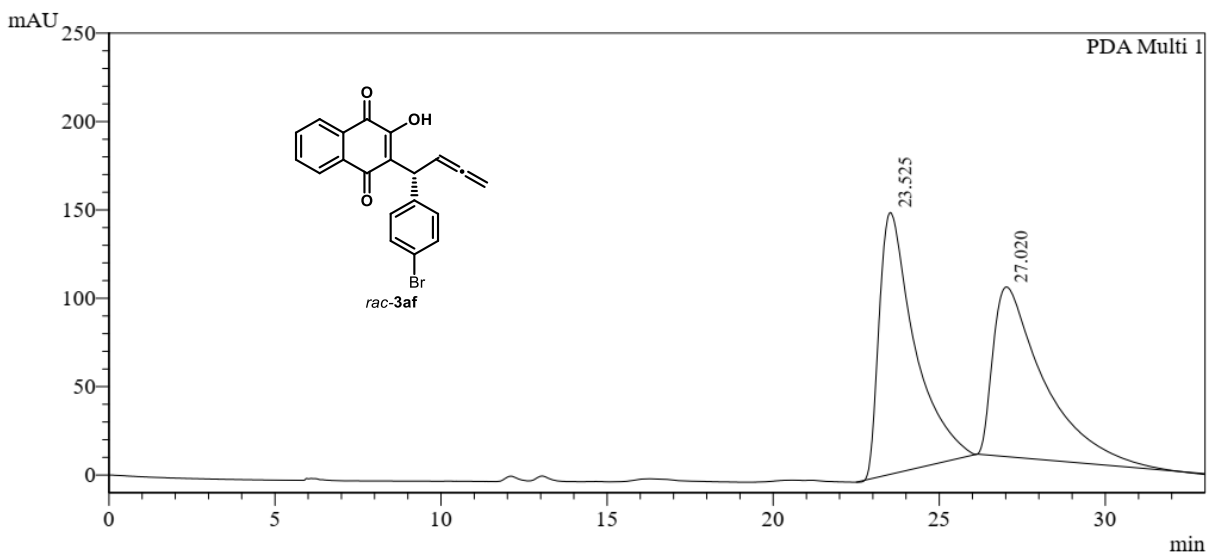

PeakTable

PDA Ch1 258nm 4nm

| Peak# | Ret. Time | Area     | Area %  |
|-------|-----------|----------|---------|
| 1     | 23.525    | 10983273 | 51.657  |
| 2     | 27.020    | 10278726 | 48.343  |
| Total |           | 21261999 | 100.000 |

Daicel Chiralpak IG column (90:10 *n*-Hexane/IPA, 0.5 mL/min, 20 °C)

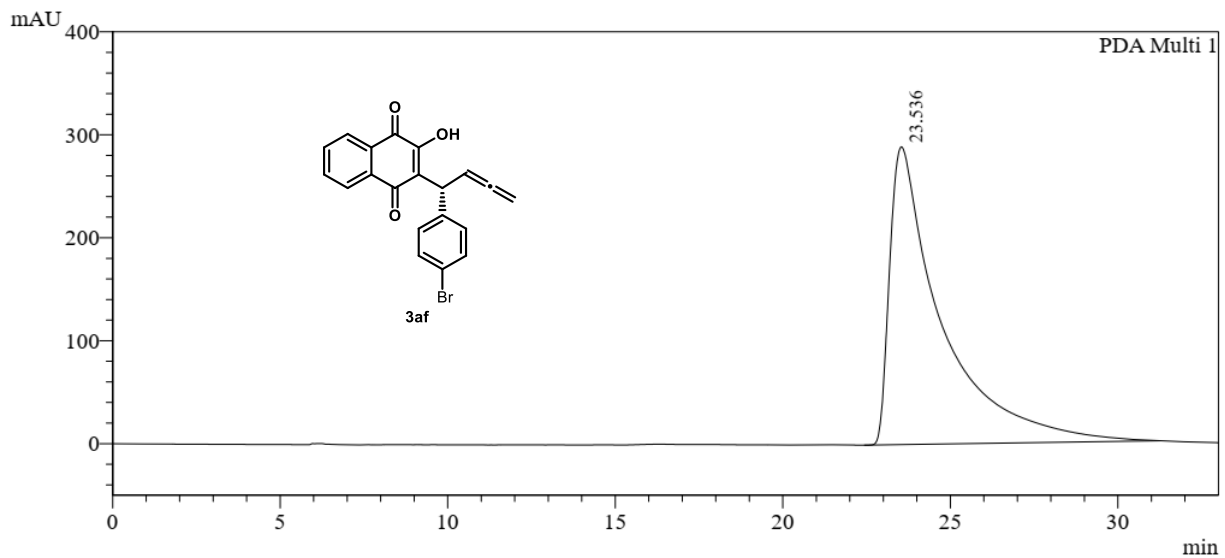

PeakTable

PDA Ch1 258nm 4nm

| Peak# | Ret. Time | Area     | Area %  |
|-------|-----------|----------|---------|
| 1     | 23.536    | 31237917 | 100.000 |
| Total |           | 31237917 | 100.000 |

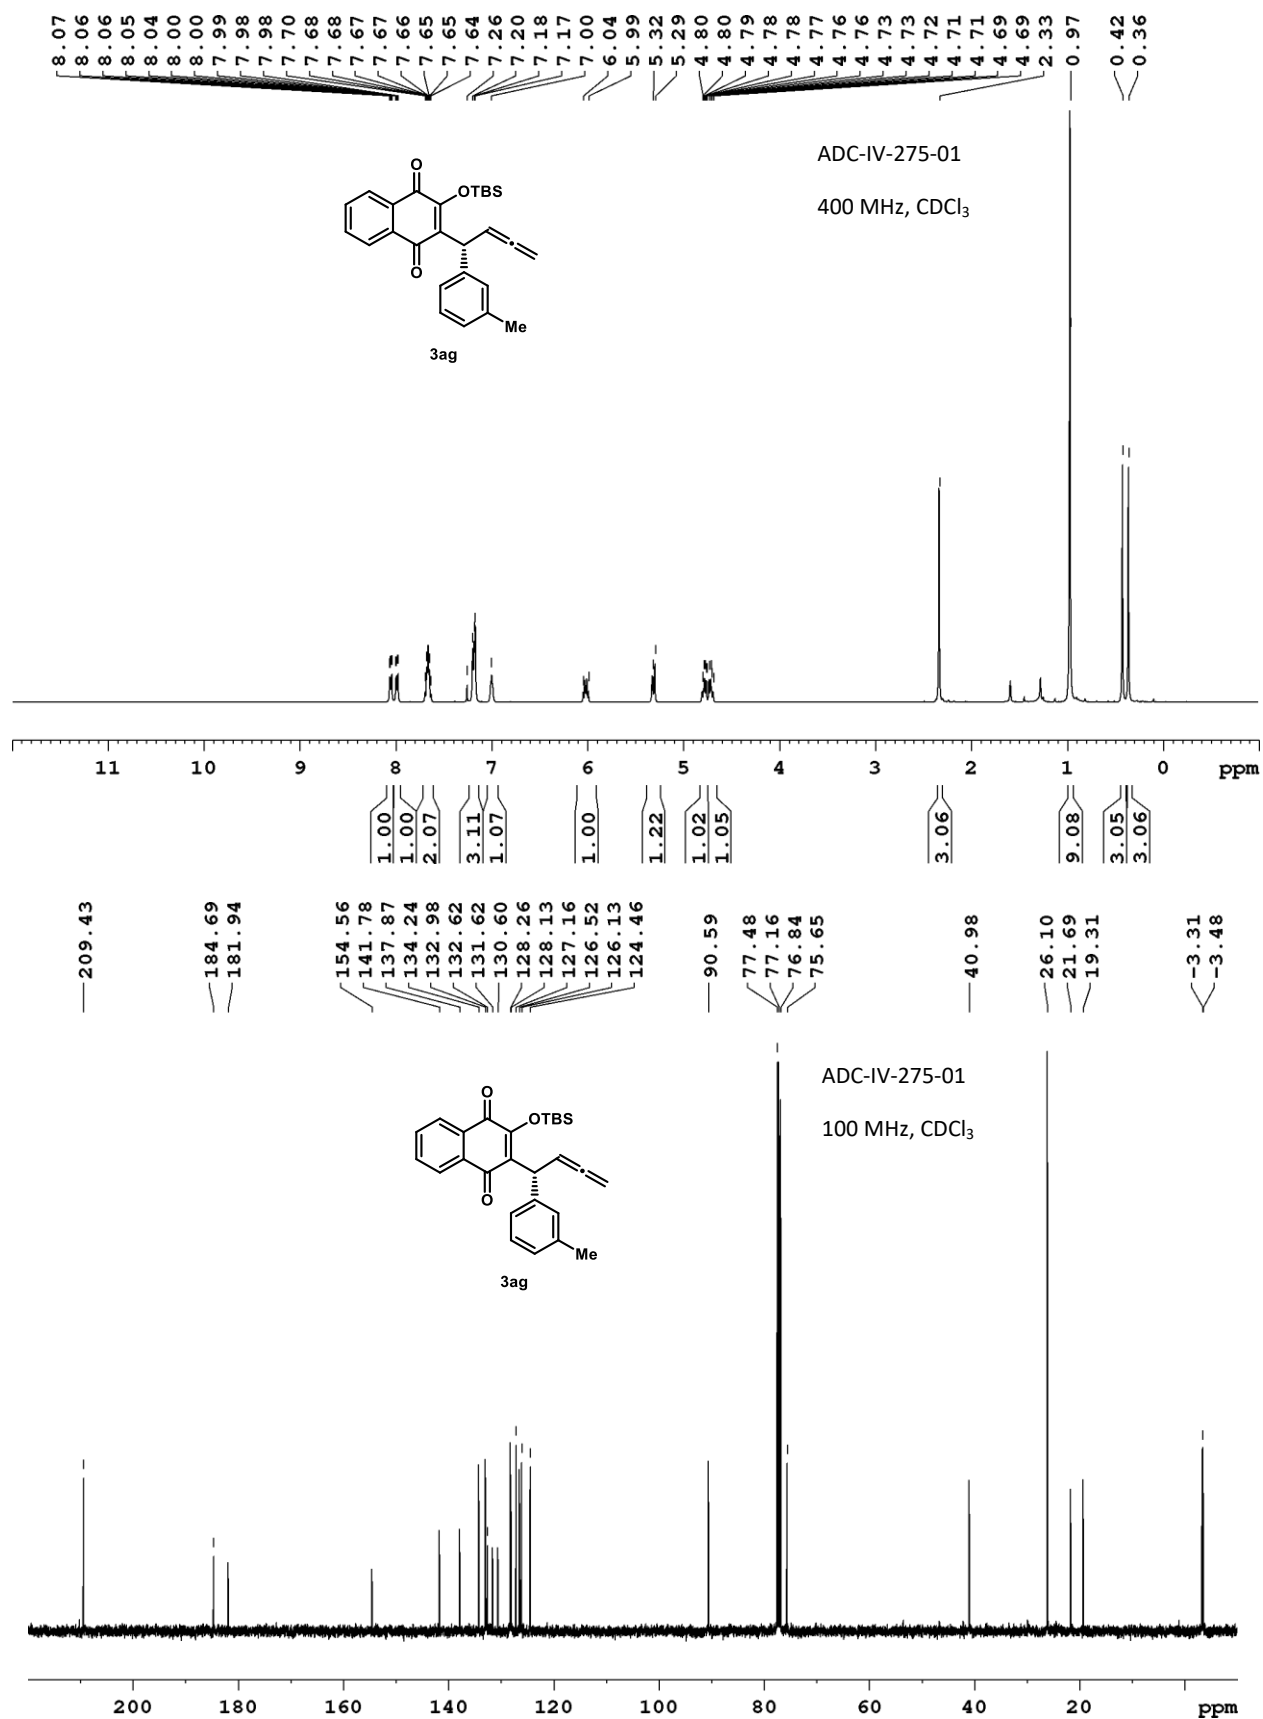

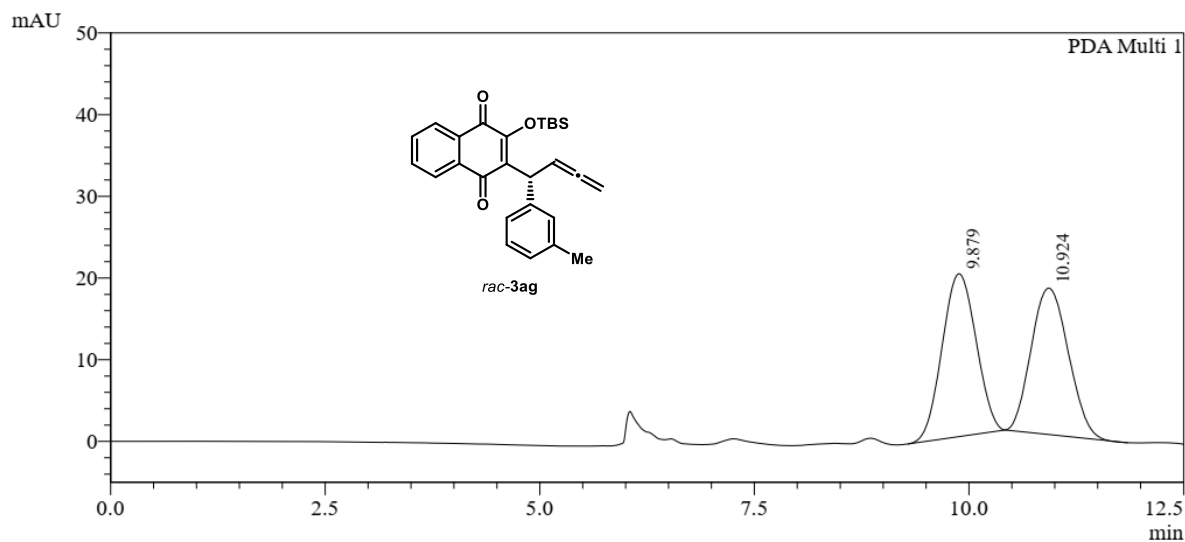

PeakTable

PDA Ch1 247nm 4nm

| Peak# | Ret. Time | Area    | Area %  |
|-------|-----------|---------|---------|
| 1     | 9.879     | 548662  | 50.387  |
| 2     | 10.924    | 540244  | 49.613  |
| Total |           | 1088906 | 100.000 |

Phenomenex Cellulose-2 column (99:1 *n*-Hexane/IPA, 0.5 mL/min, 20 °C)

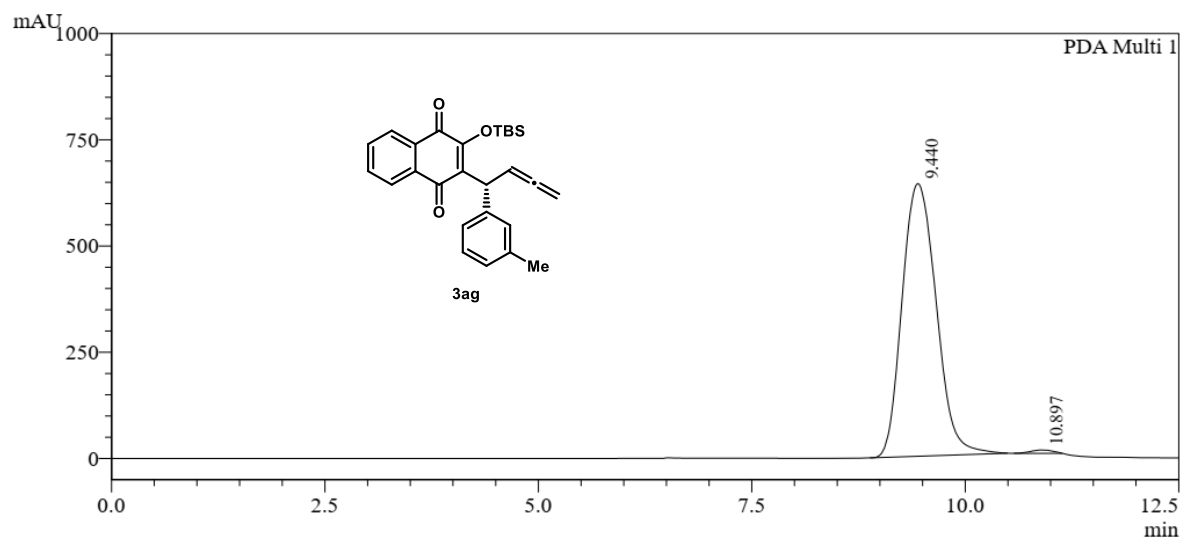

PeakTable

PDA Ch1 247nm 4nm

| Peak# | Ret. Time | Area     | Area %  |
|-------|-----------|----------|---------|
| 1     | 9.440     | 17869874 | 99.194  |
| 2     | 10.897    | 145197   | 0.806   |
| Total |           | 18015072 | 100.000 |

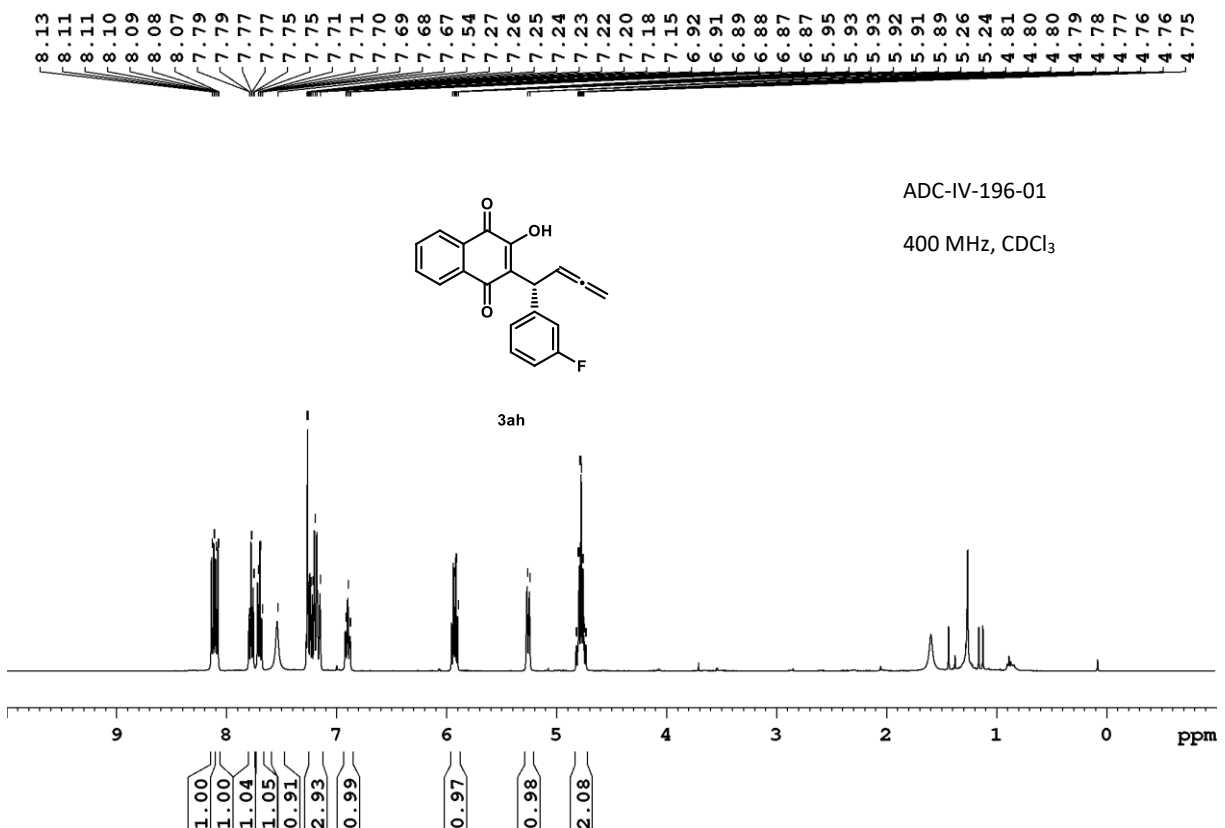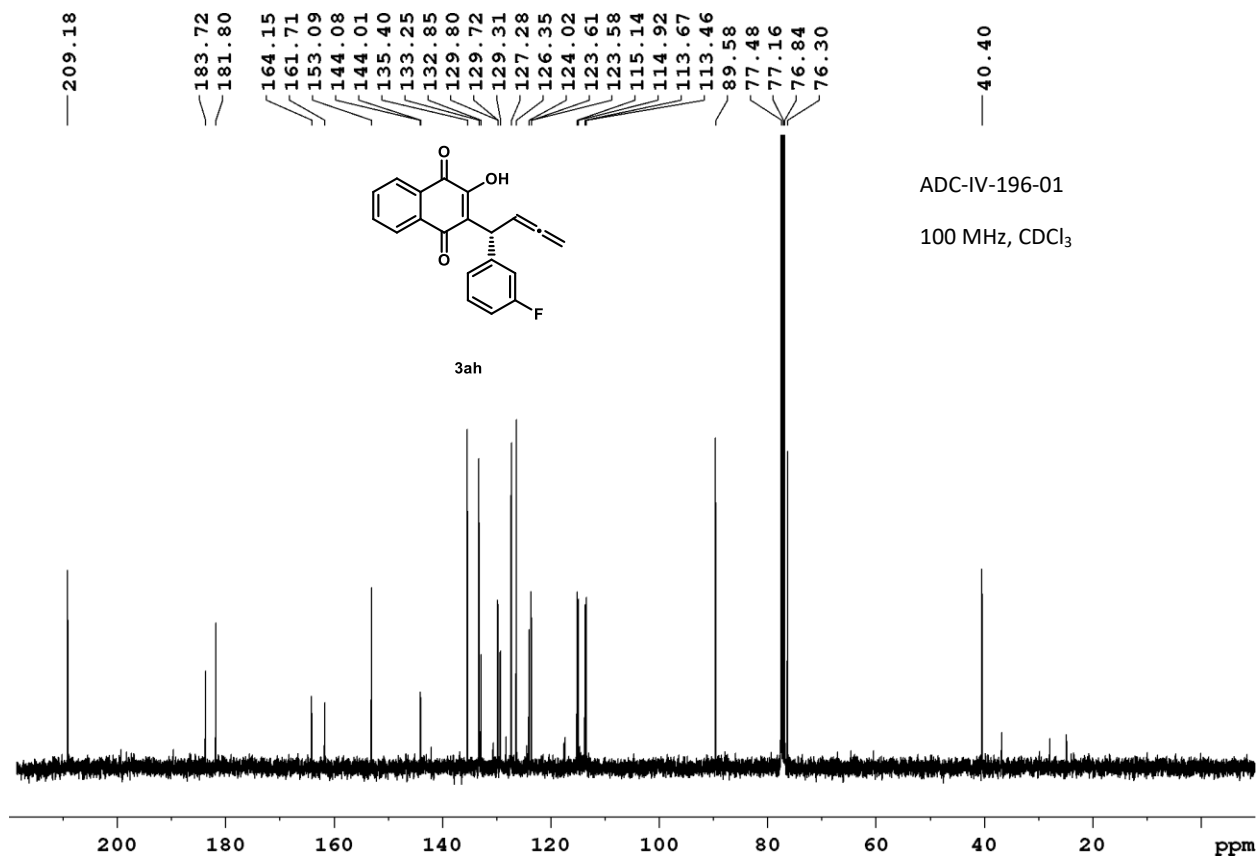

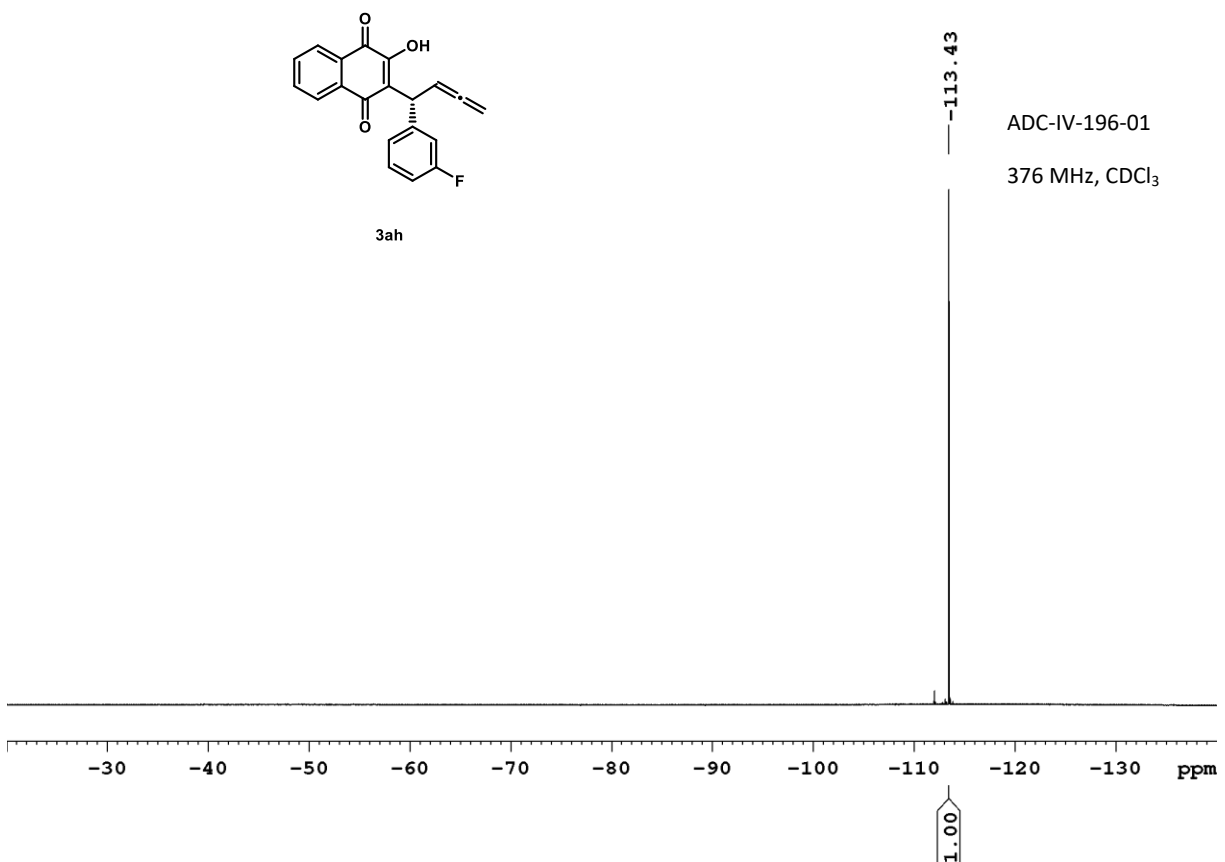

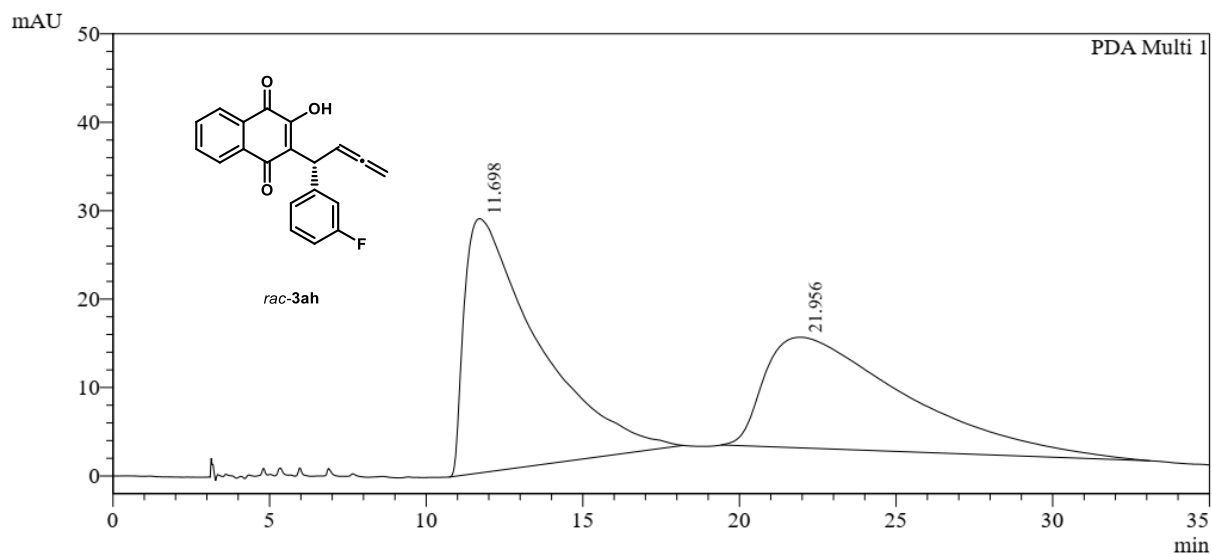

PeakTable

PDA Ch1 252nm 4nm

| Peak# | Ret. Time | Area    | Area %  |
|-------|-----------|---------|---------|
| 1     | 11.698    | 4723570 | 54.406  |
| 2     | 21.956    | 3958501 | 45.594  |
| Total |           | 8682071 | 100.000 |

Daicel Chiralpak ID column (90:10 *n*-Hexane/IPA, 1.0 mL/min, 20 °C)

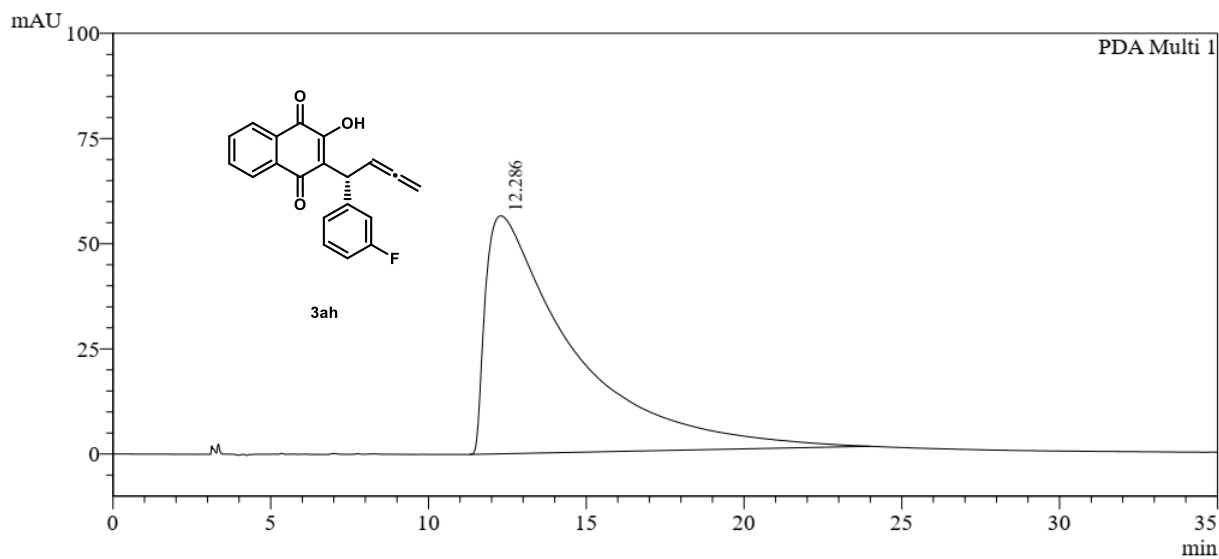

PeakTable

PDA Ch1 252nm 4nm

| Peak# | Ret. Time | Area     | Area %  |
|-------|-----------|----------|---------|
| 1     | 12.286    | 10989014 | 100.000 |
| Total |           | 10989014 | 100.000 |

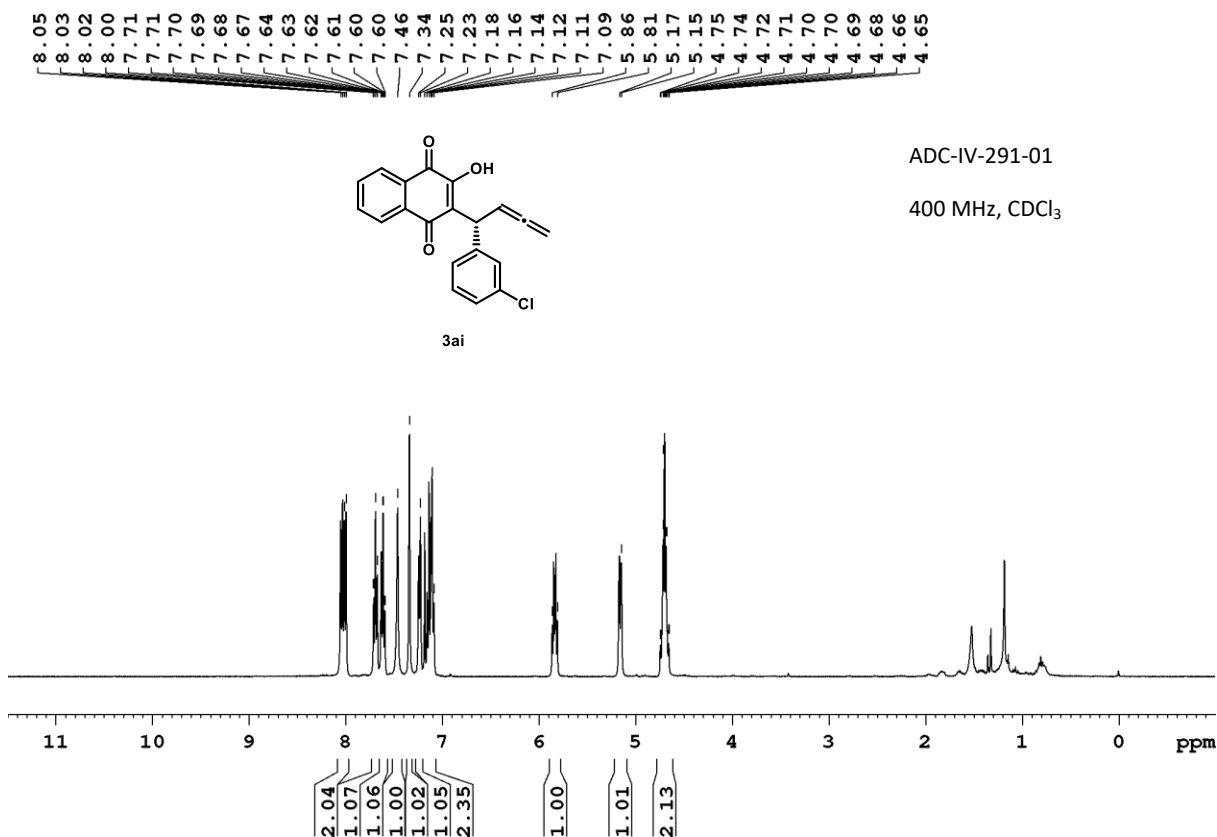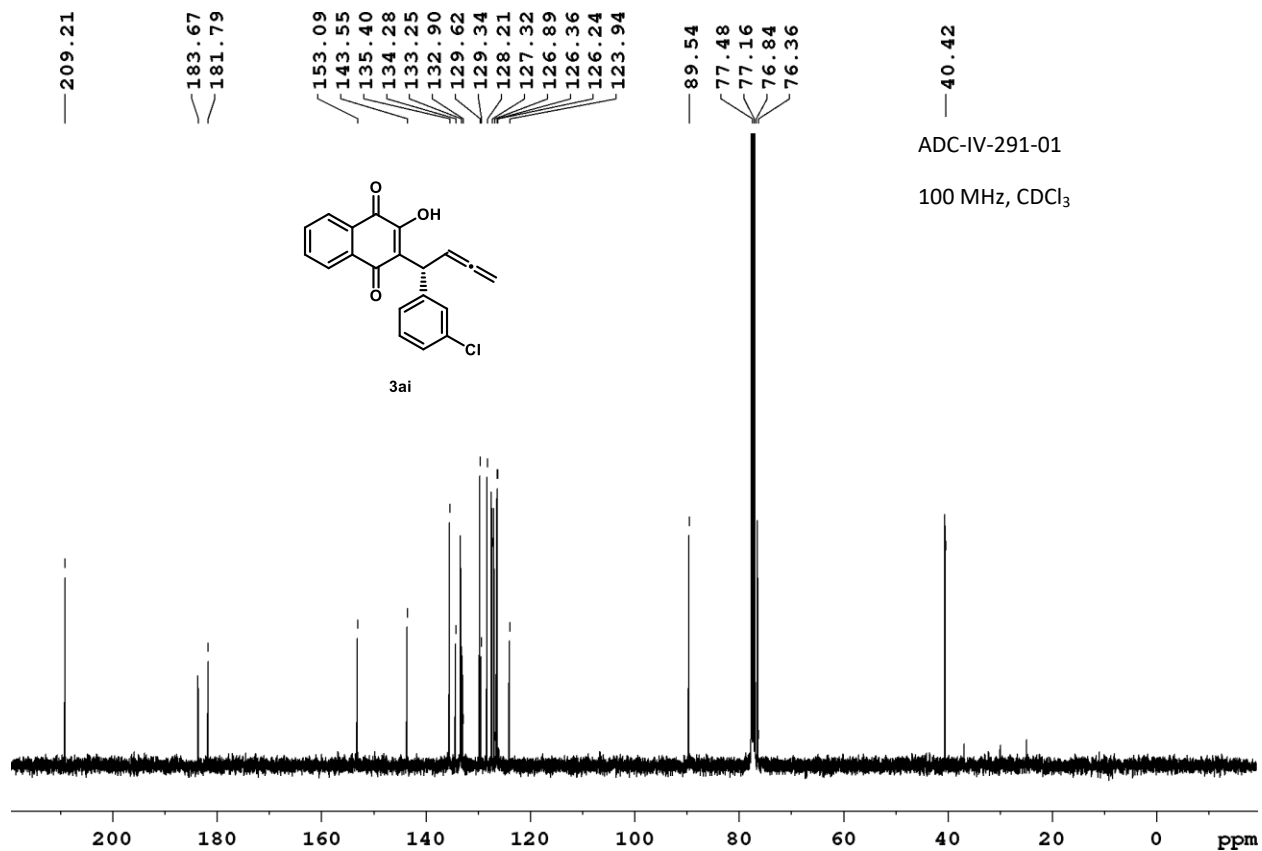

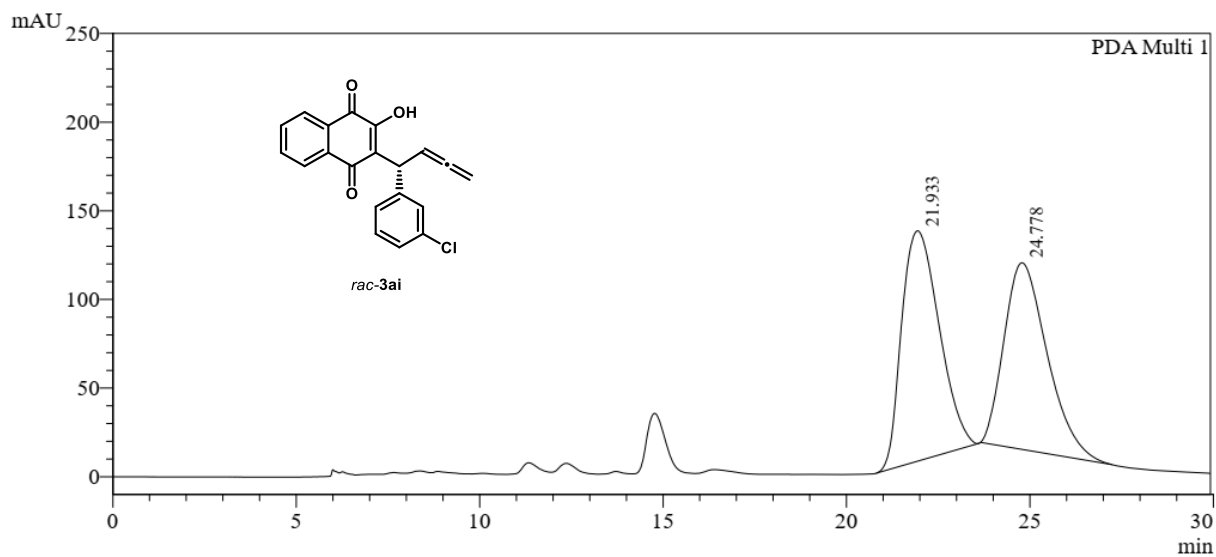

PeakTable

PDA Ch1 242nm 4nm

| Peak# | Ret. Time | Area     | Area %  |
|-------|-----------|----------|---------|
| 1     | 21.933    | 9252332  | 51.757  |
| 2     | 24.778    | 8624068  | 48.243  |
| Total |           | 17876399 | 100.000 |

Daicel Chiralpak AD-H column (90:10 *n*-Hexane/EtOH, 0.5 mL/min, 20 °C)

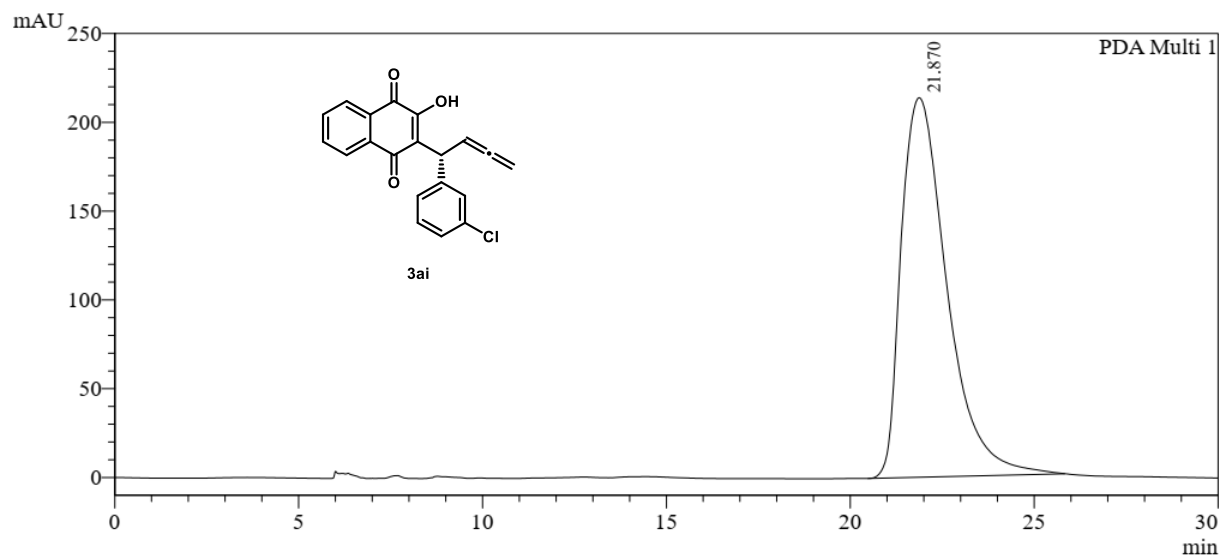

PeakTable

PDA Ch1 242nm 4nm

| Peak# | Ret. Time | Area     | Area %  |
|-------|-----------|----------|---------|
| 1     | 21.870    | 18524557 | 100.000 |
| Total |           | 18524557 | 100.000 |

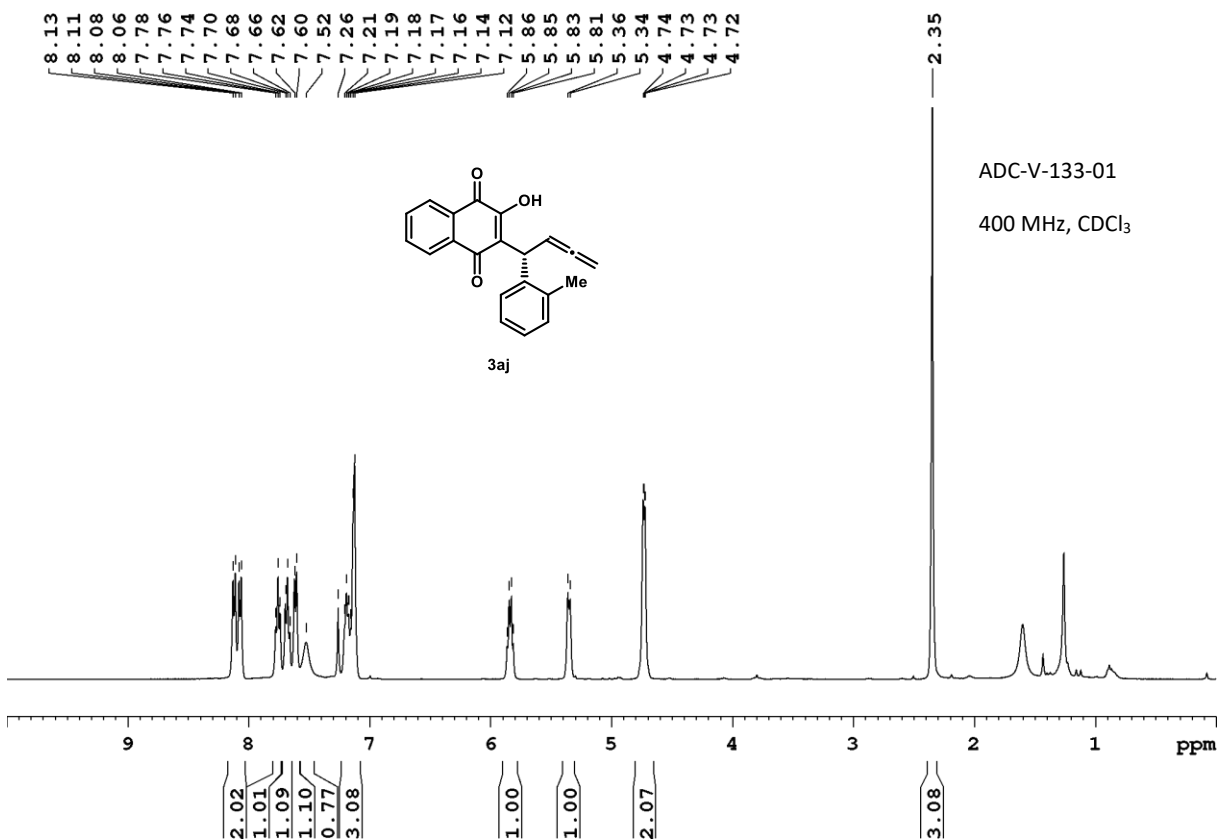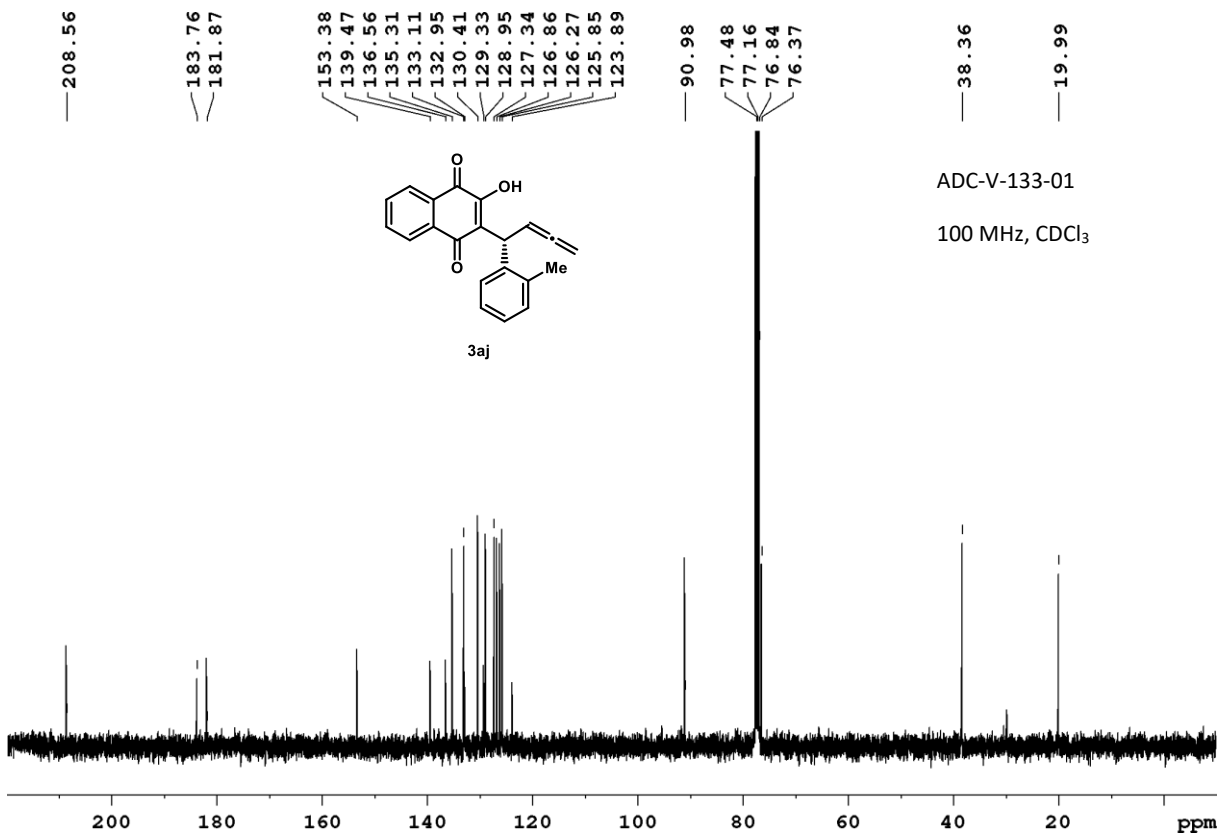

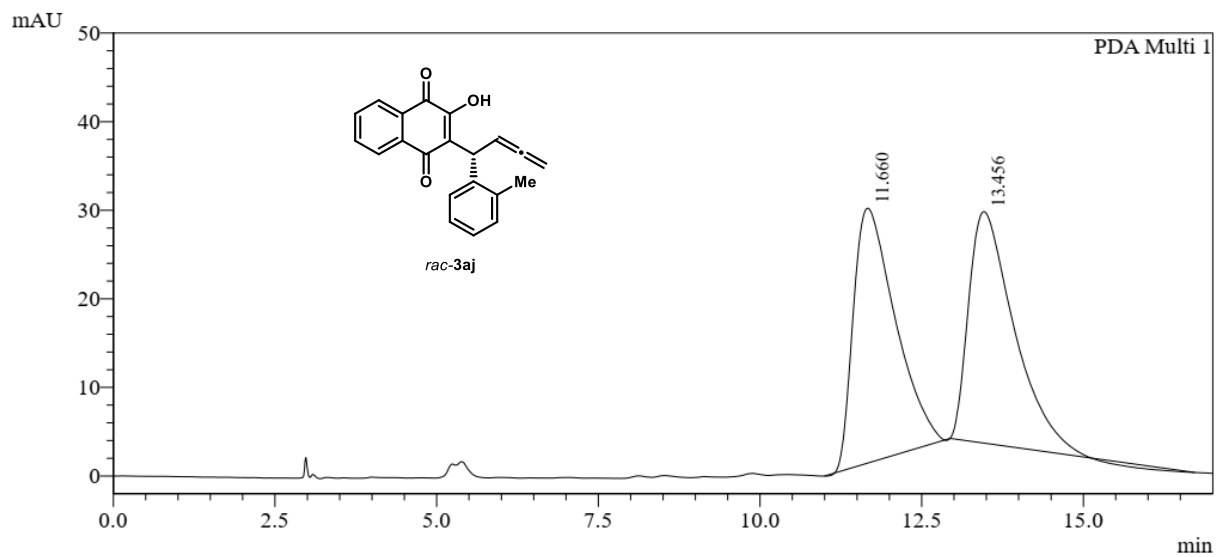

PeakTable

PDA Ch1 274nm 4nm

| Peak# | Ret. Time | Area    | Area %  |
|-------|-----------|---------|---------|
| 1     | 11.660    | 1296026 | 50.611  |
| 2     | 13.456    | 1264754 | 49.389  |
| Total |           | 2560780 | 100.000 |

Daicel Chiralpak AD-H column (90:10 *n*-Hexane/IPA, 1.0 mL/min, 20 °C)

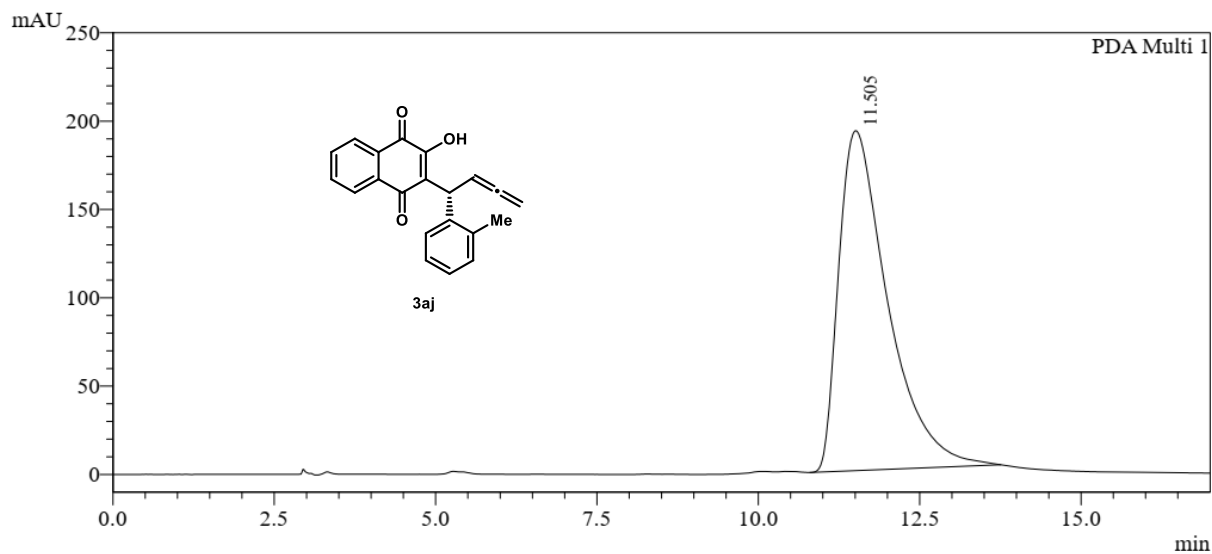

PeakTable

PDA Ch1 274nm 4nm

| Peak# | Ret. Time | Area     | Area %  |
|-------|-----------|----------|---------|
| 1     | 11.505    | 10187039 | 100.000 |
| Total |           | 10187039 | 100.000 |

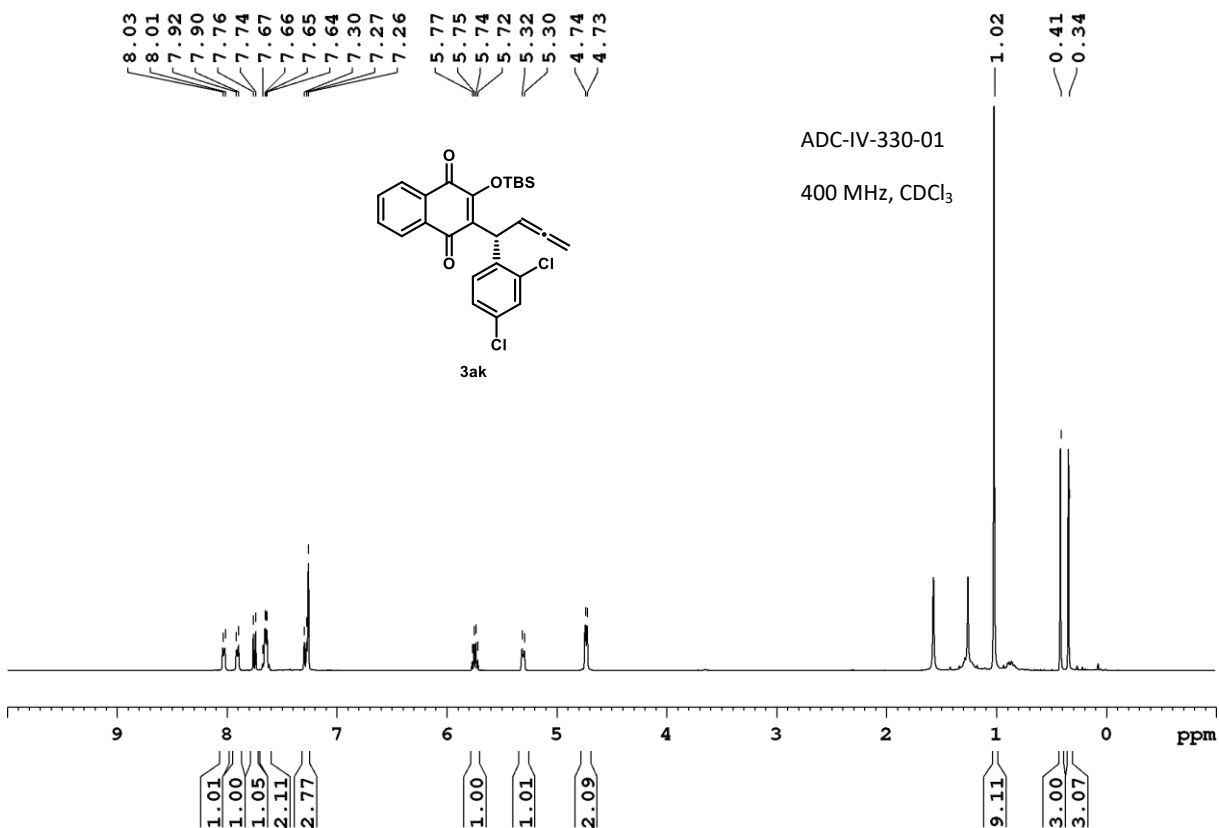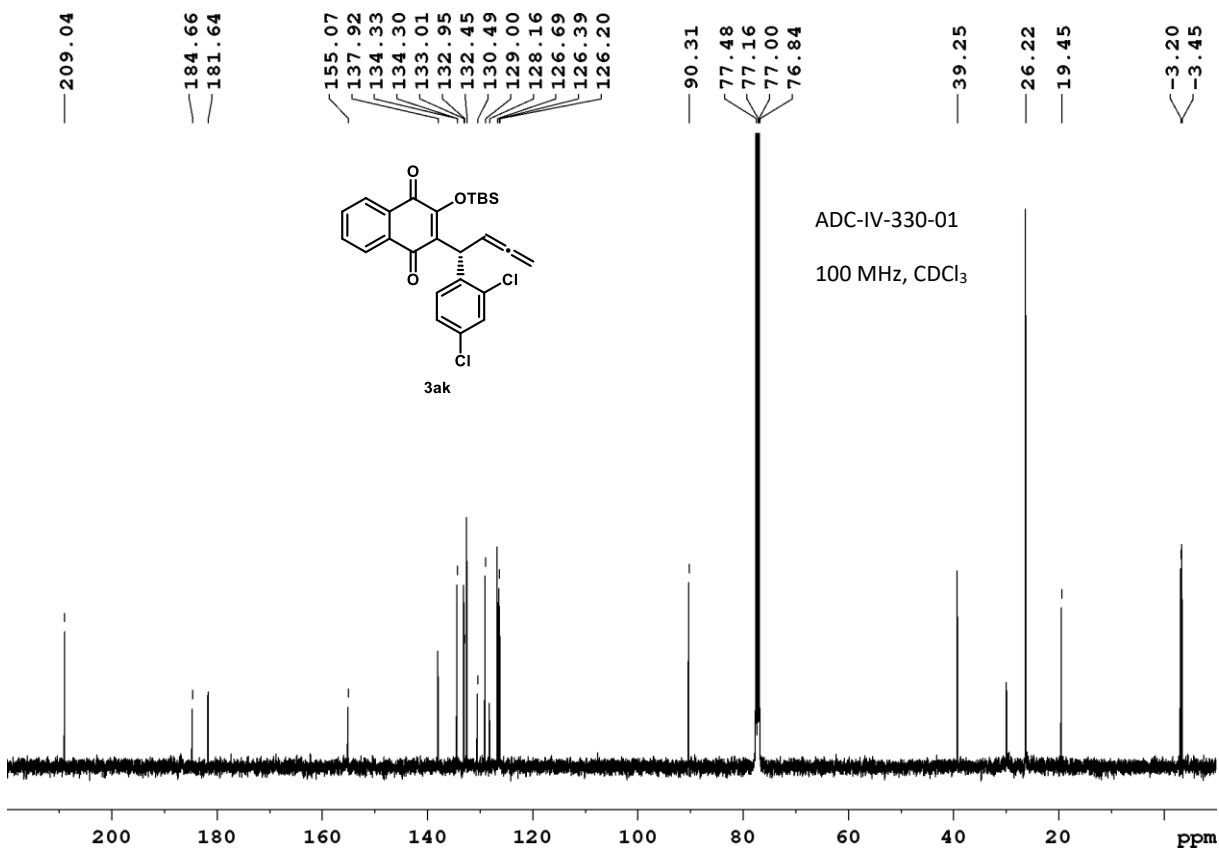

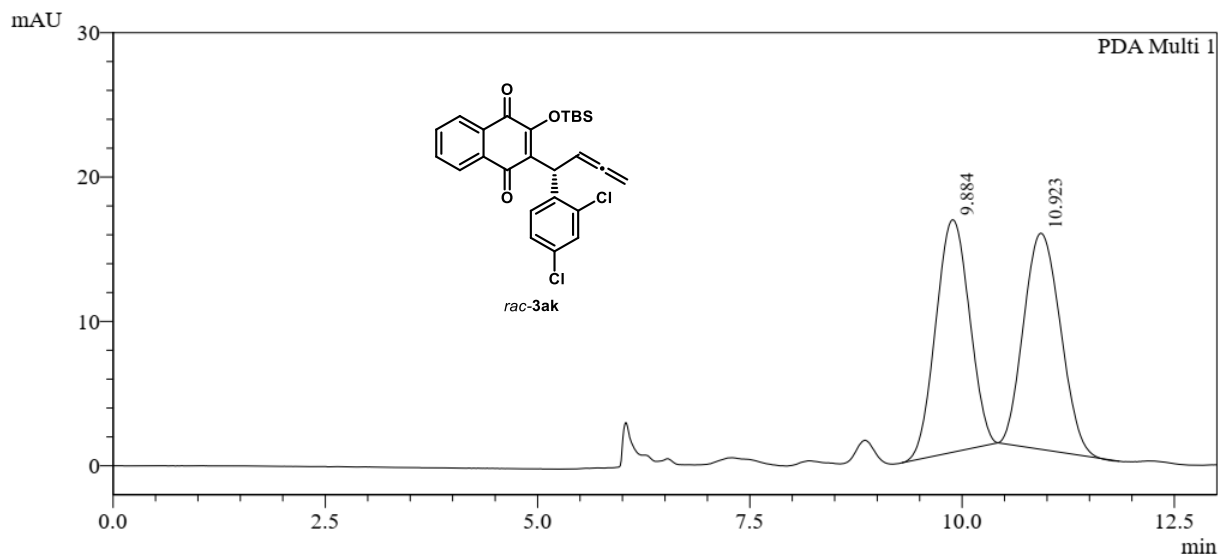

PeakTable

PDA Ch1 263nm 4nm

| Peak# | Ret. Time | Area   | Area %  |
|-------|-----------|--------|---------|
| 1     | 9.884     | 445059 | 49.668  |
| 2     | 10.923    | 451015 | 50.332  |
| Total |           | 896075 | 100.000 |

Phenomenex Cellulose-2 column (99:1 *n*-Hexane/IPA, 0.5 mL/min, 20 °C)

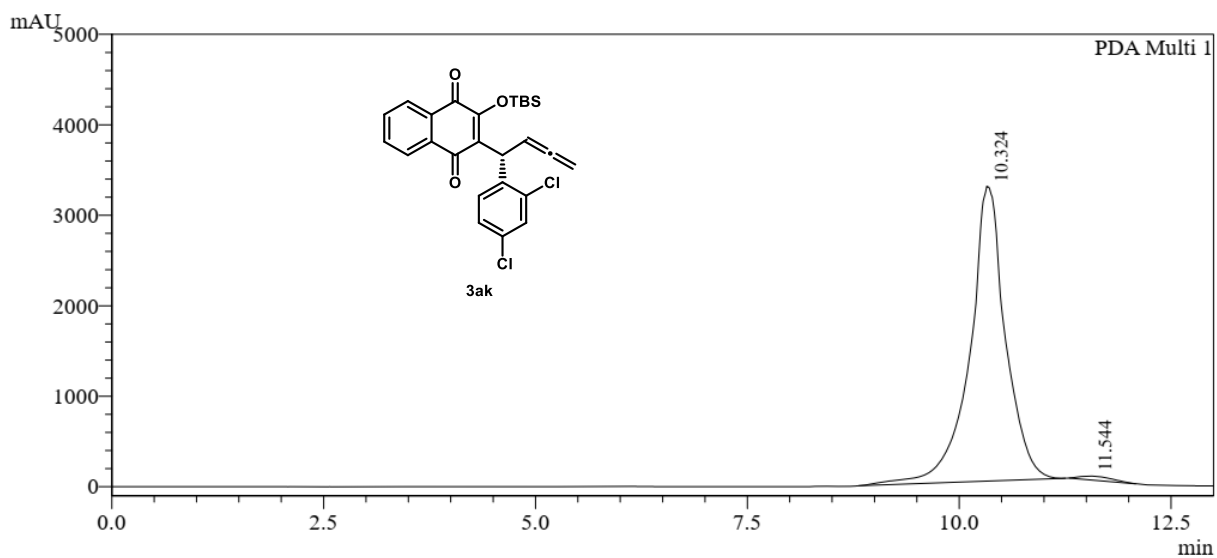

PeakTable

PDA Ch1 263nm 4nm

| Peak# | Ret. Time | Area     | Area %  |
|-------|-----------|----------|---------|
| 1     | 10.324    | 95652623 | 98.791  |
| 2     | 11.544    | 1170996  | 1.209   |
| Total |           | 96823619 | 100.000 |

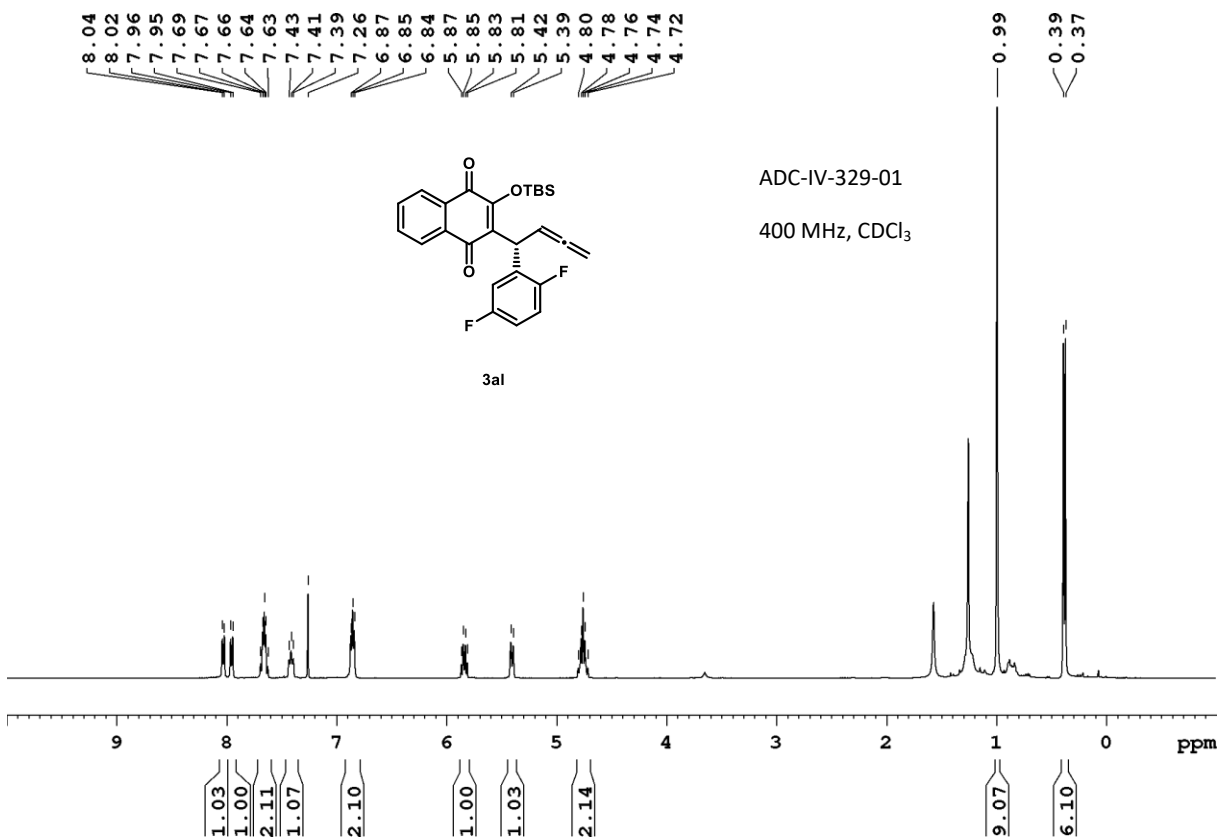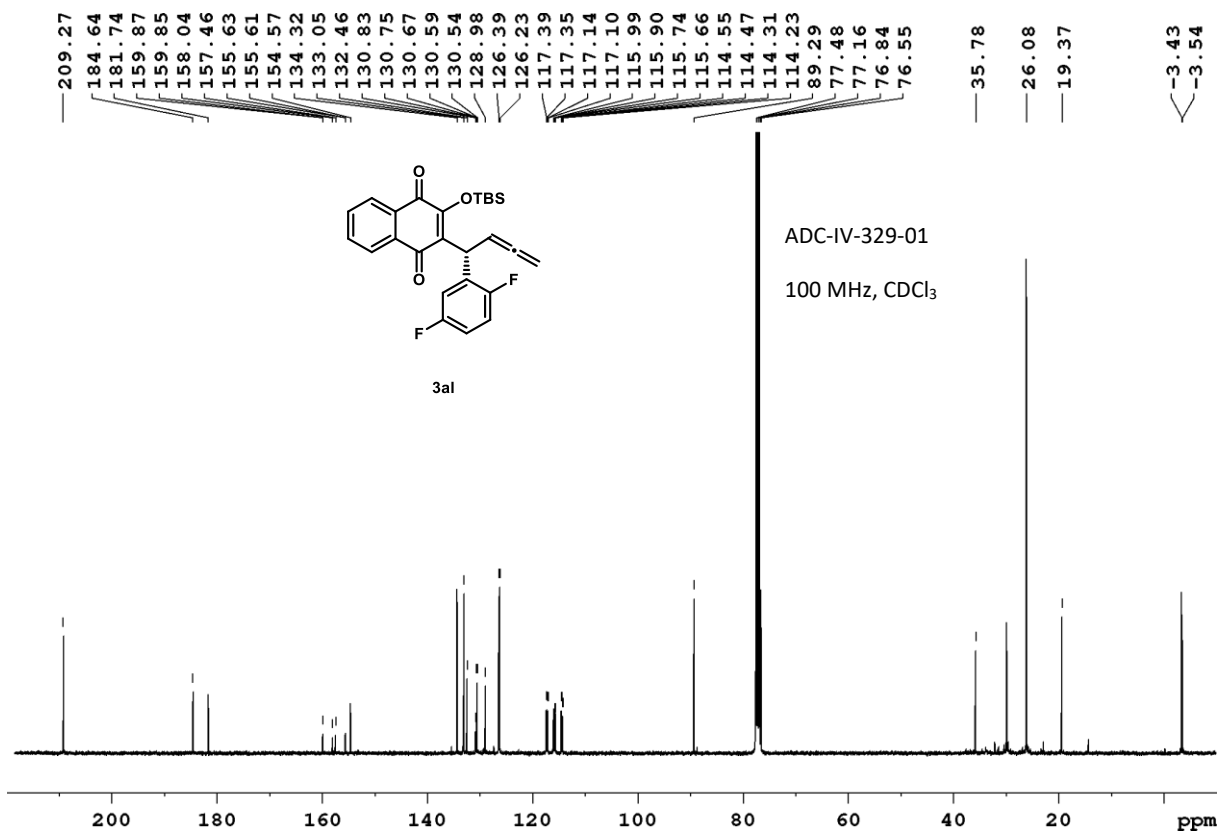

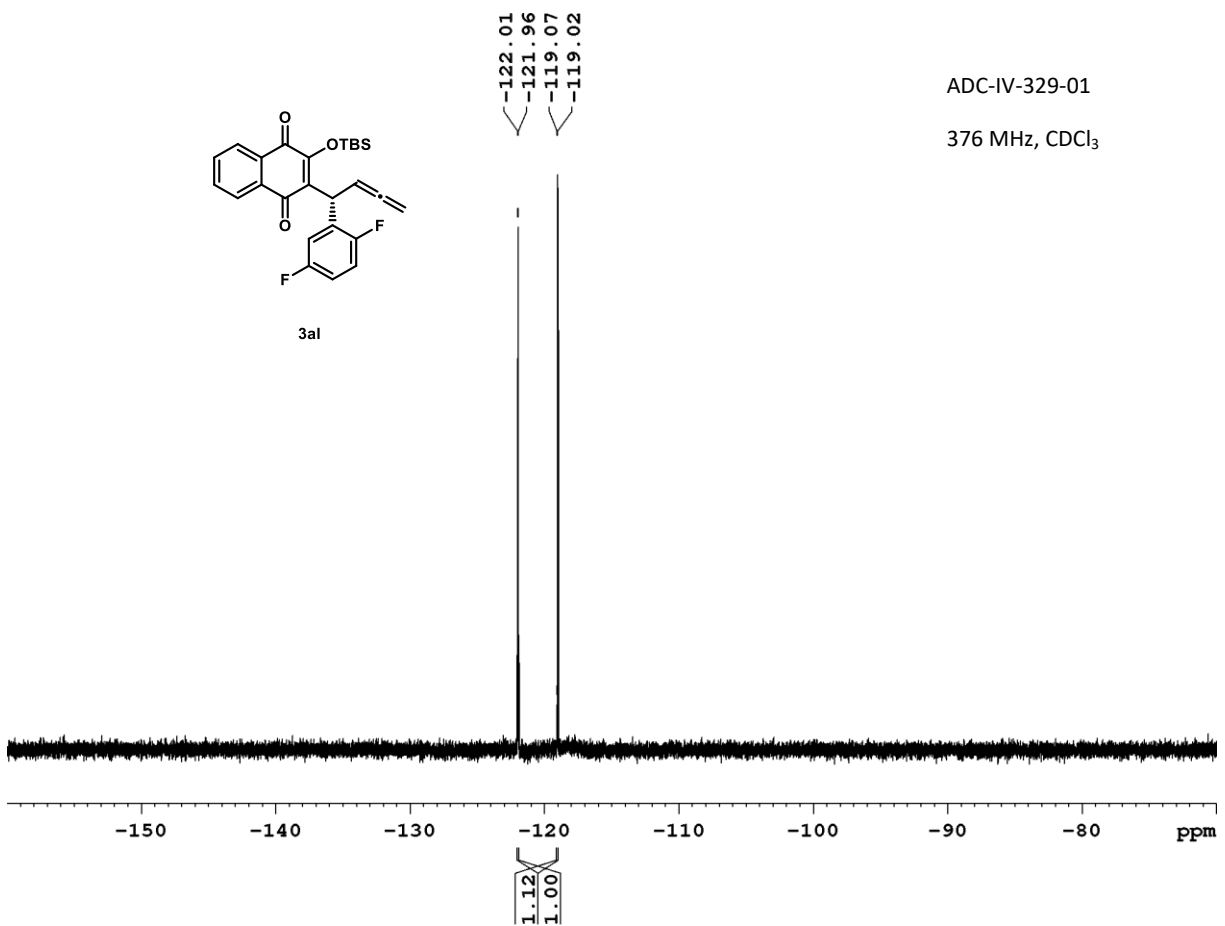

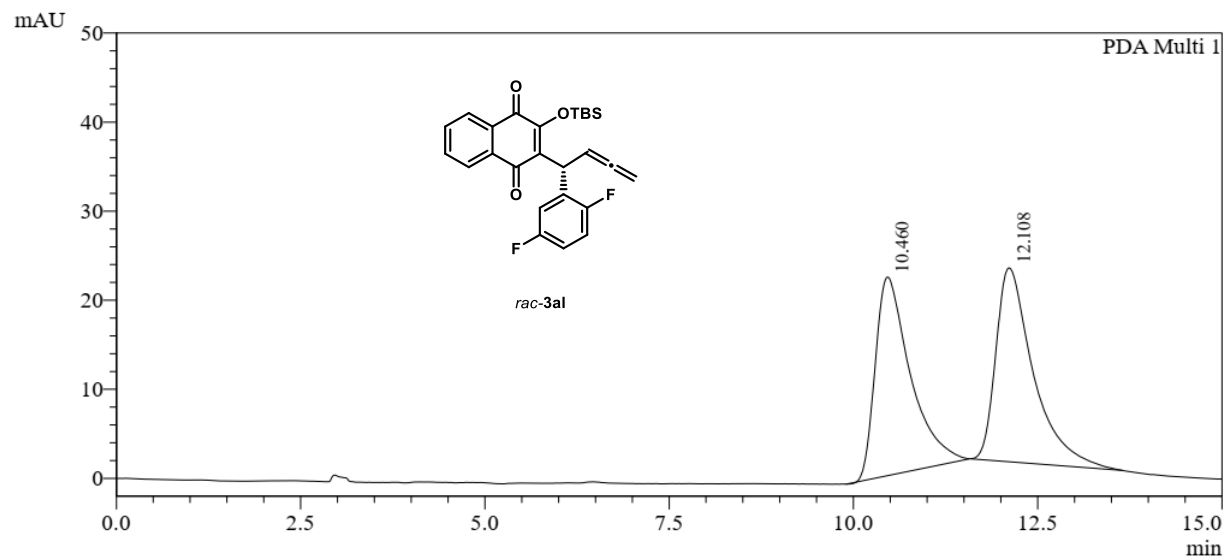

PeakTable

PDA Ch1 290nm 4nm

| Peak# | Ret. Time | Area    | Area %  |
|-------|-----------|---------|---------|
| 1     | 10.460    | 736517  | 48.974  |
| 2     | 12.108    | 767363  | 51.026  |
| Total |           | 1503880 | 100.000 |

Daicel Chiralpak AD-H column (85:15 *n*-Hexane/IPA, 1.0 mL/min, 20 °C)

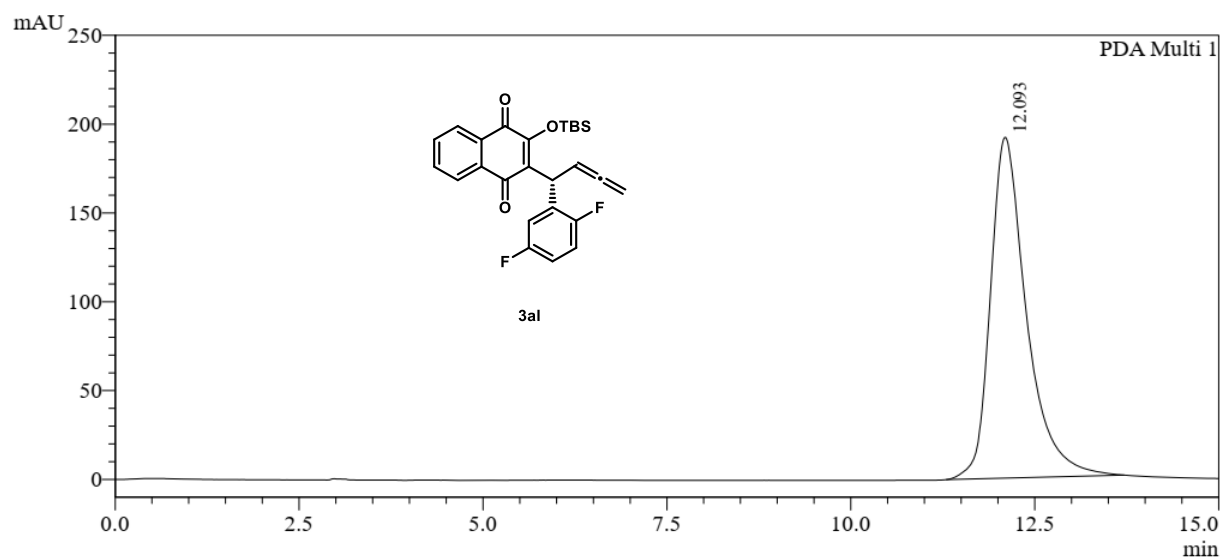

PeakTable

PDA Ch1 290nm 4nm

| Peak# | Ret. Time | Area    | Area %  |
|-------|-----------|---------|---------|
| 1     | 12.093    | 6559122 | 100.000 |
| Total |           | 6559122 | 100.000 |

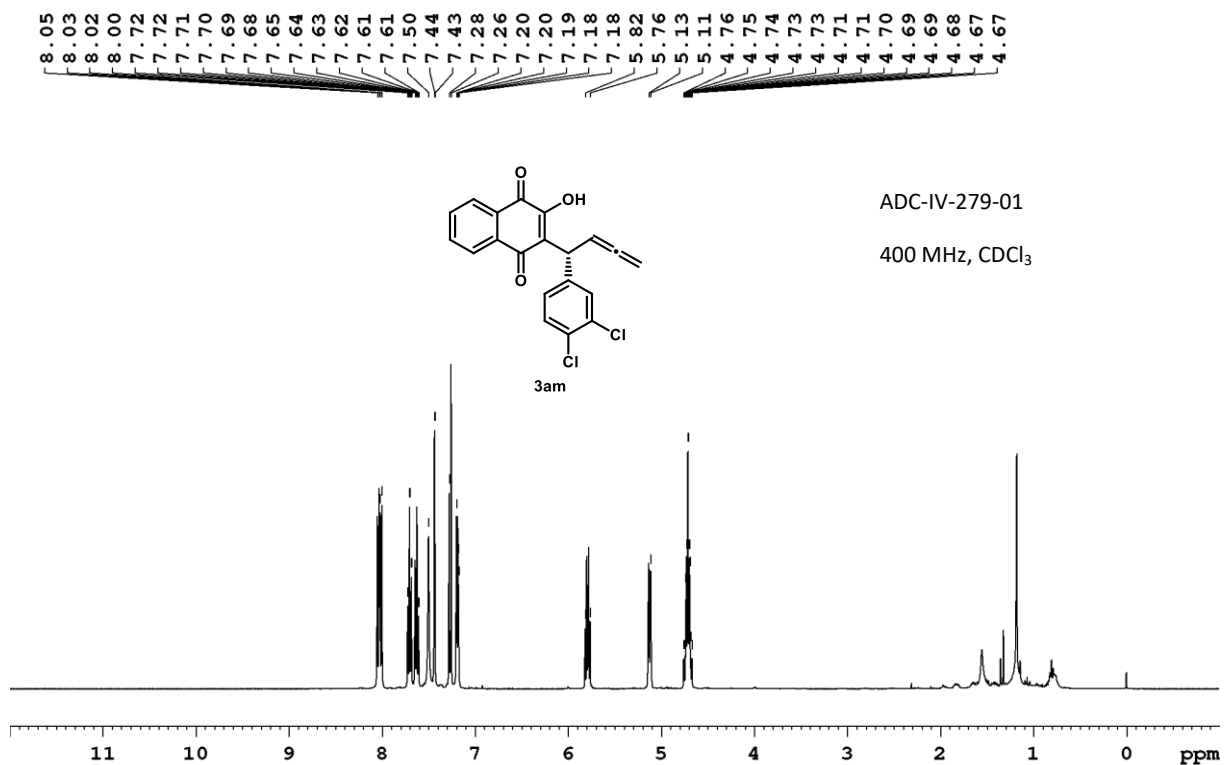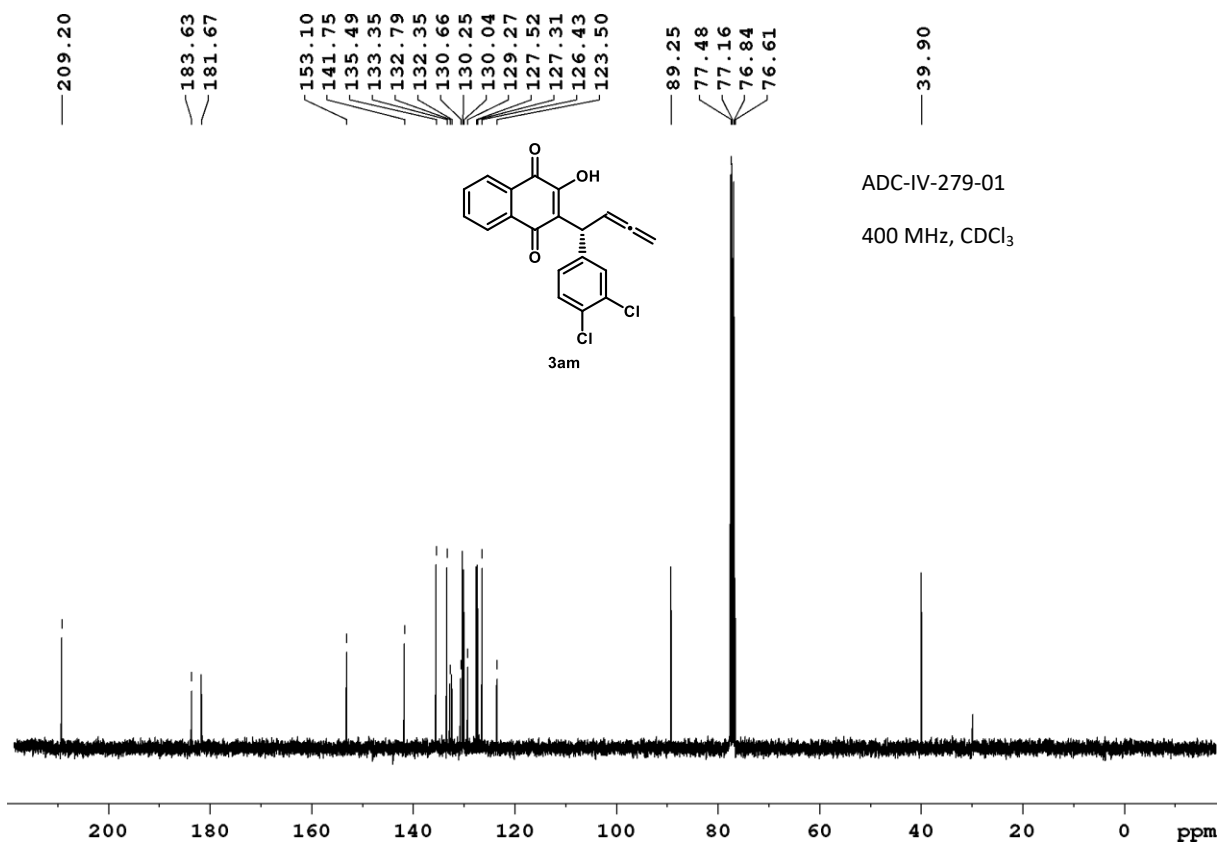

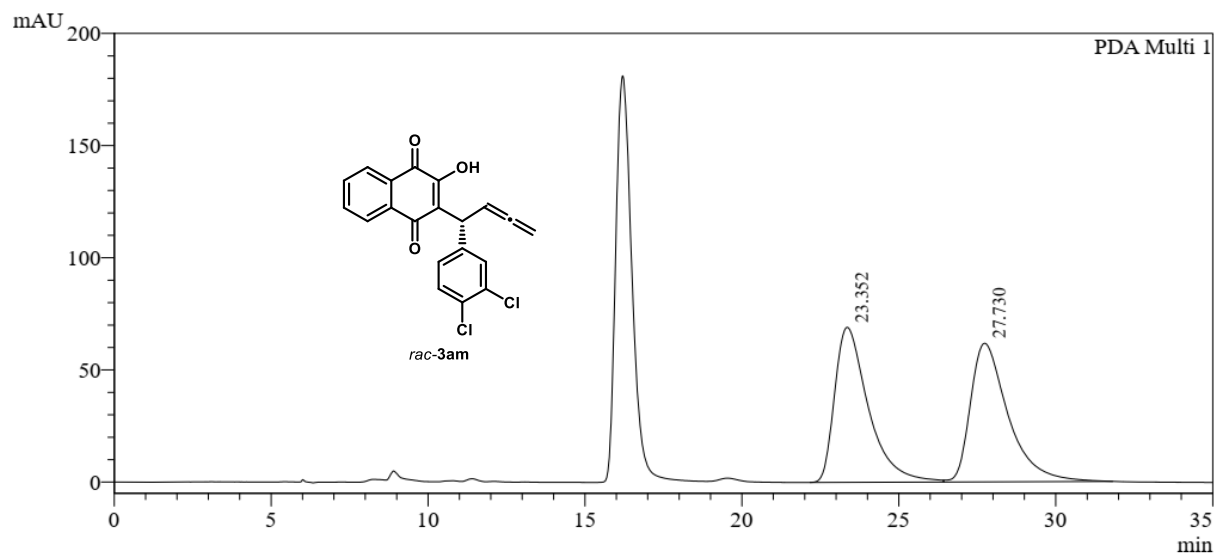

PeakTable

PDA Ch1 299nm 4nm

| Peak# | Ret. Time | Area     | Area %  |
|-------|-----------|----------|---------|
| 1     | 23.352    | 5151484  | 49.960  |
| 2     | 27.730    | 5159753  | 50.040  |
| Total |           | 10311237 | 100.000 |

Daicel Chiralpak AD-H column (90:10 *n*-Hexane/EtOH, 0.5 mL/min, 20 °C)

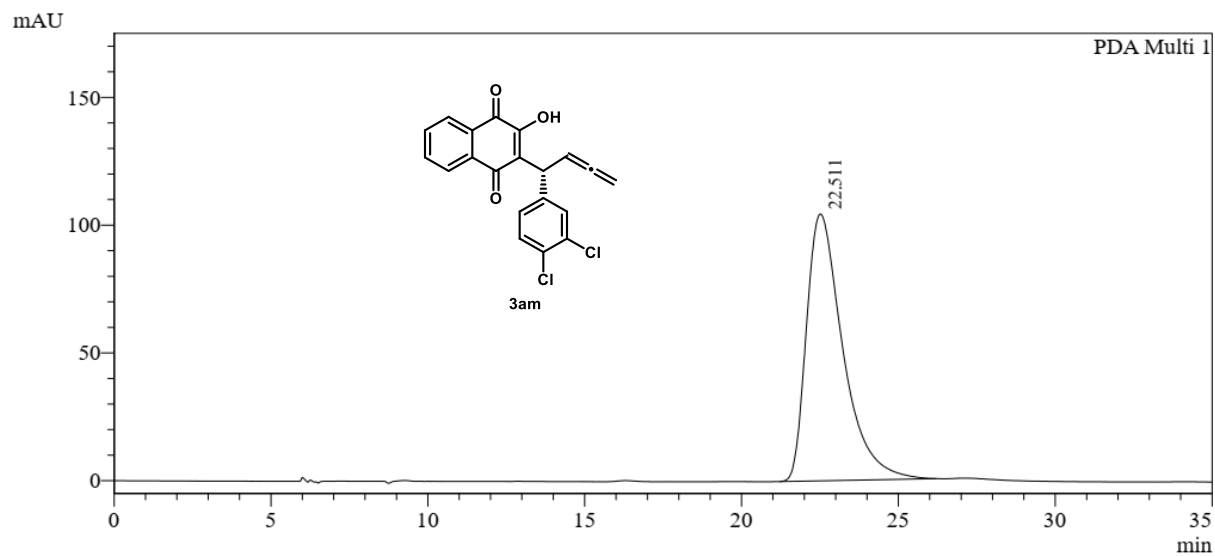

PeakTable

PDA Ch1 299nm 4nm

| Peak# | Ret. Time | Area    | Area %  |
|-------|-----------|---------|---------|
| 1     | 22.511    | 8415226 | 100.000 |
| Total |           | 8415226 | 100.000 |

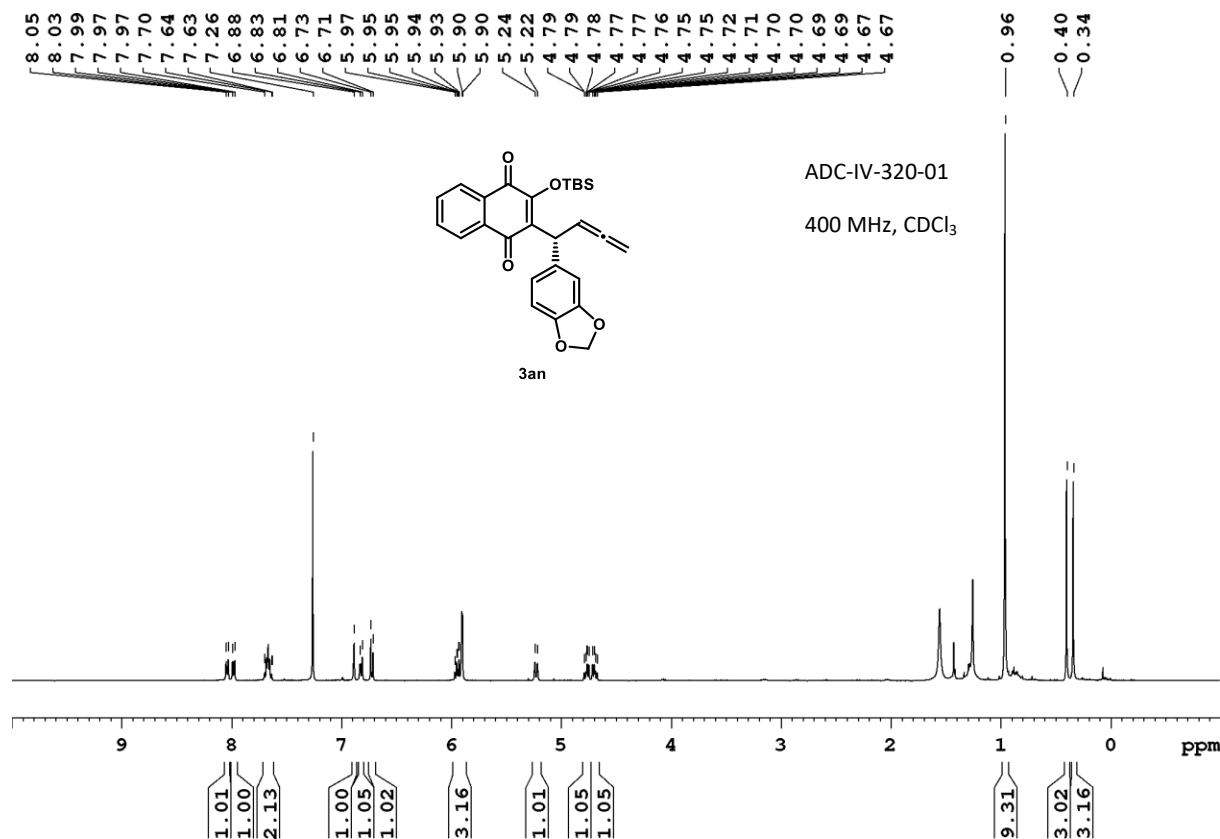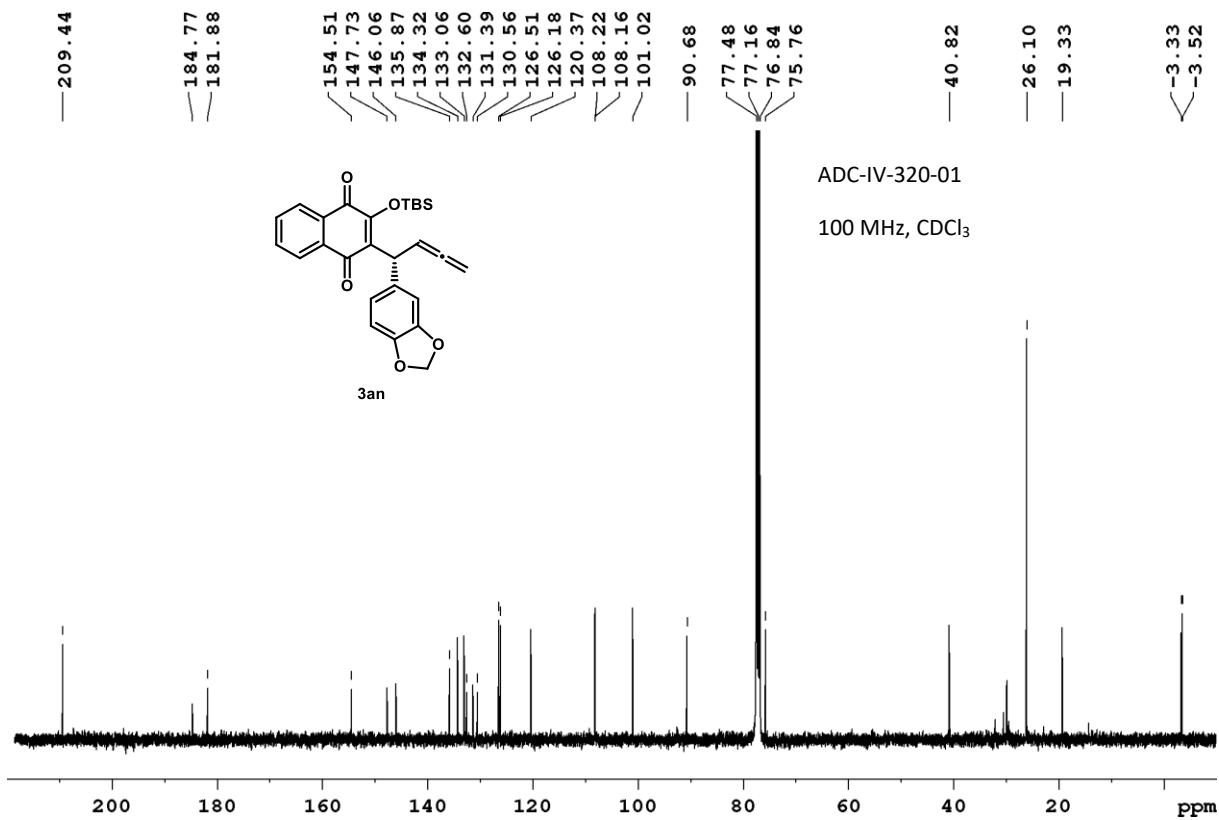

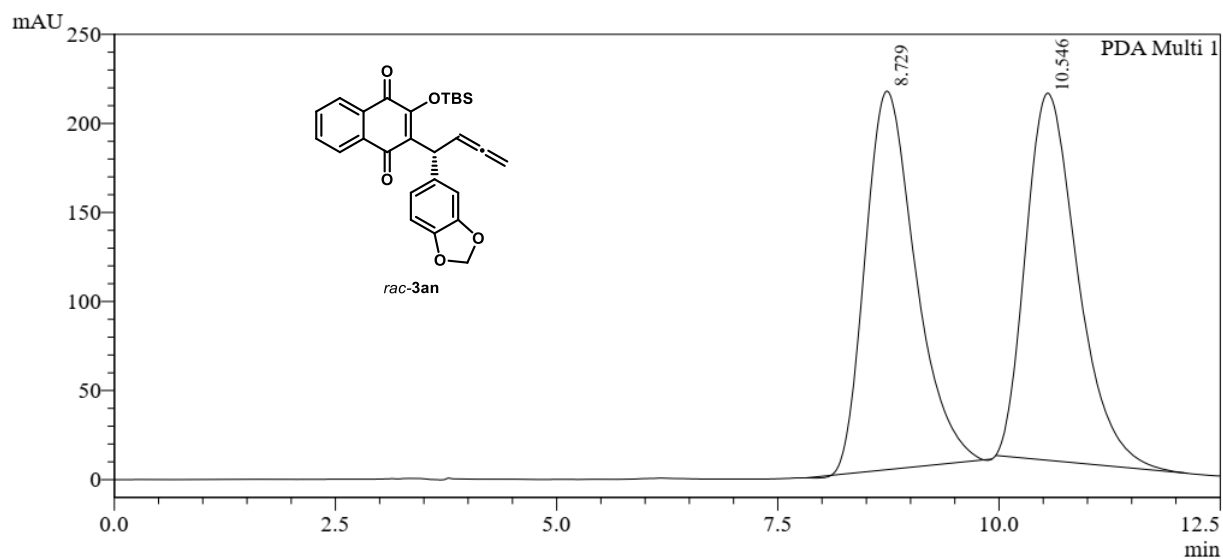

PeakTable

PDA Ch1 254nm 4nm

| Peak# | Ret. Time | Area     | Area %  |
|-------|-----------|----------|---------|
| 1     | 8.729     | 8394133  | 49.901  |
| 2     | 10.546    | 8427425  | 50.099  |
| Total |           | 16821558 | 100.000 |

Daicel Chiralpak IG column (99:1 *n*-Hexane/EtOH, 1.0 mL/min, 20 °C)

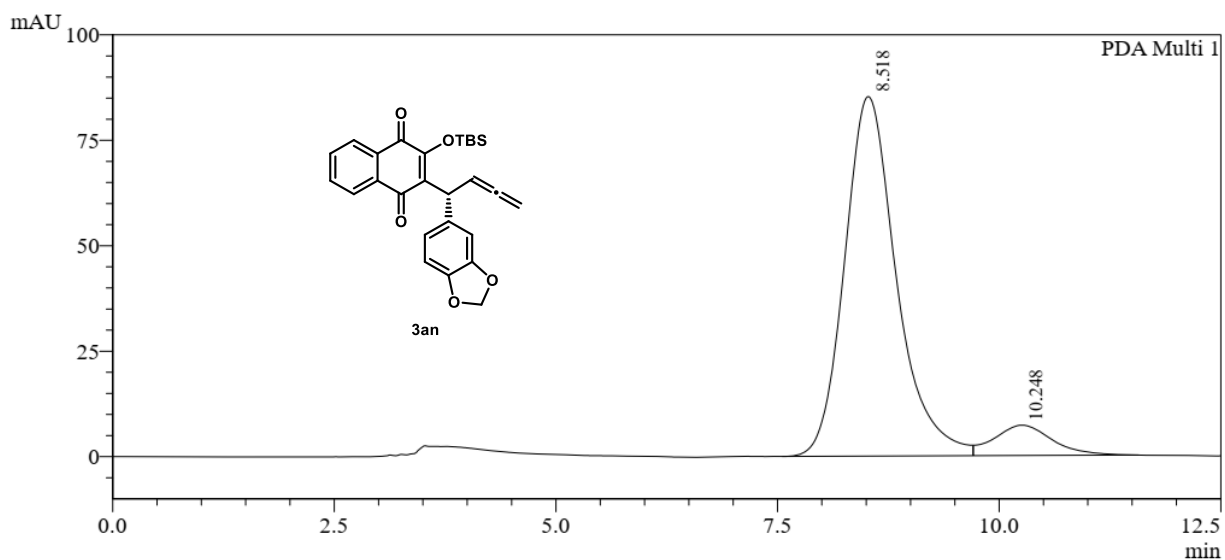

PeakTable

PDA Ch1 254nm 4nm

| Peak# | Ret. Time | Area    | Area %  |
|-------|-----------|---------|---------|
| 1     | 8.518     | 3462871 | 91.335  |
| 2     | 10.248    | 328519  | 8.665   |
| Total |           | 3791391 | 100.000 |

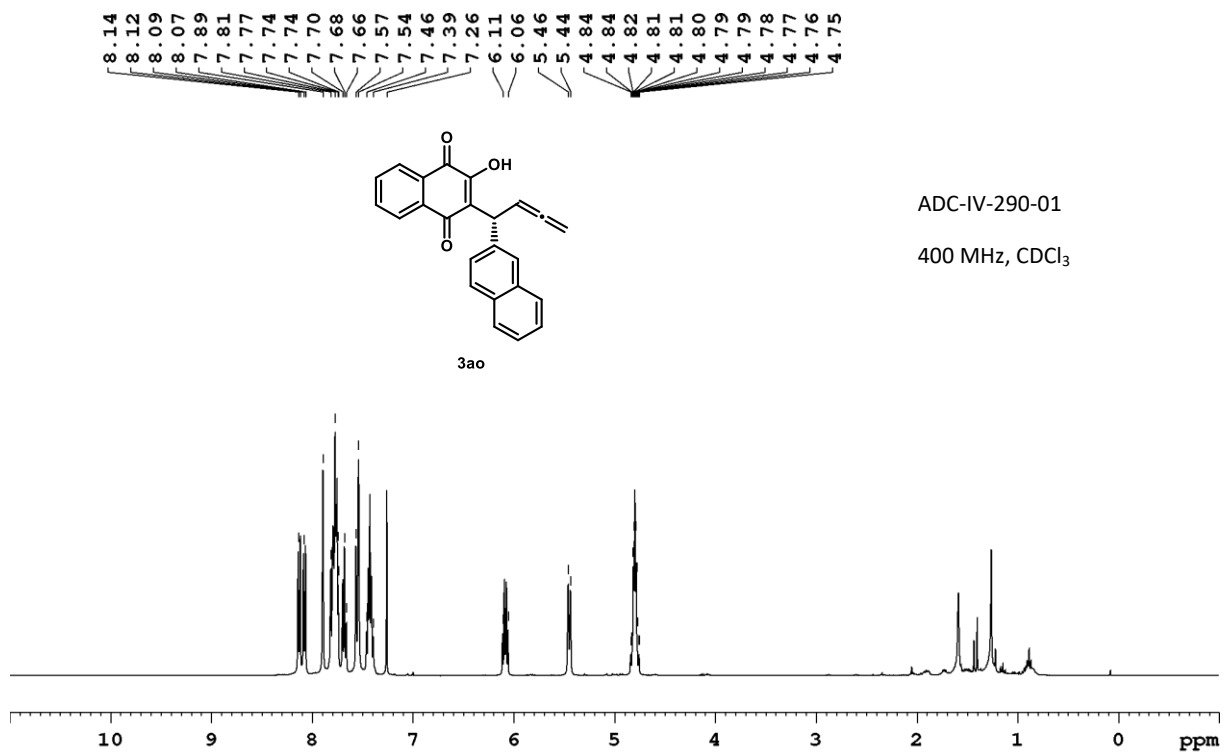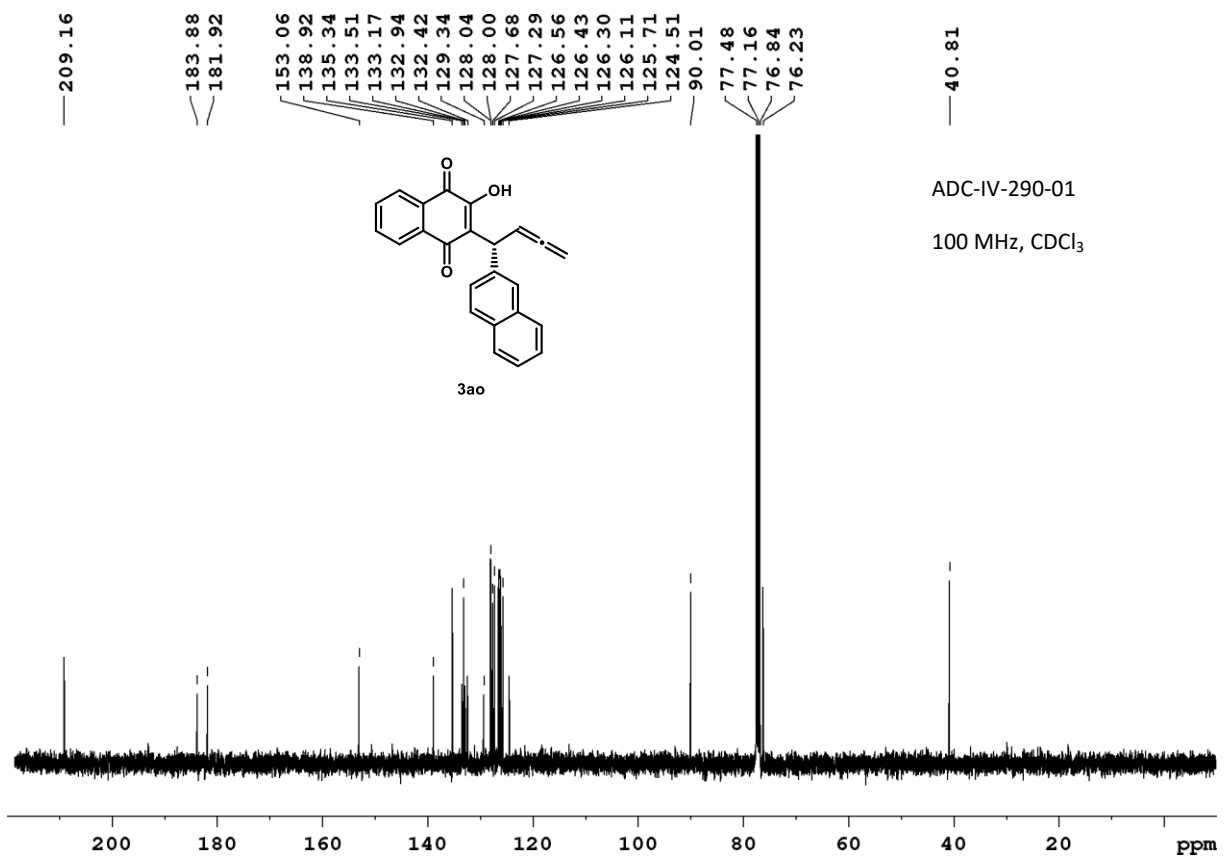

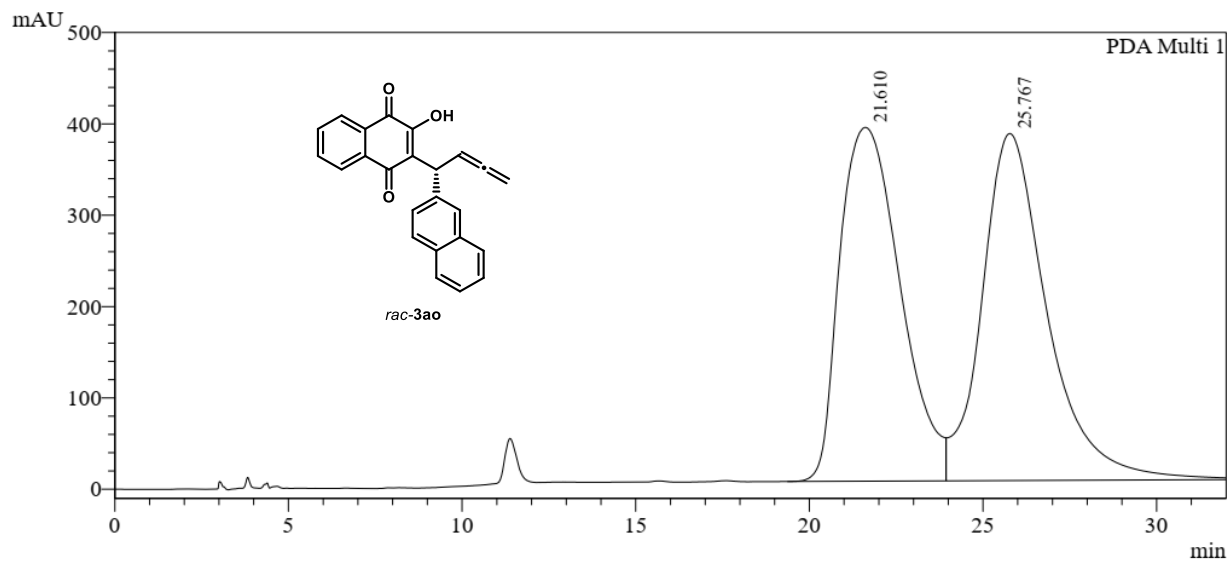

PeakTable

PDA Ch1 226nm 4nm

| Peak# | Ret. Time | Area     | Area %  |
|-------|-----------|----------|---------|
| 1     | 21.610    | 47030508 | 48.574  |
| 2     | 25.767    | 49791599 | 51.426  |
| Total |           | 96822107 | 100.000 |

Daicel Chiralpak AD-H column (90:10 *n*-Hexane/EtOH, 1.0 mL/min, 20 °C)

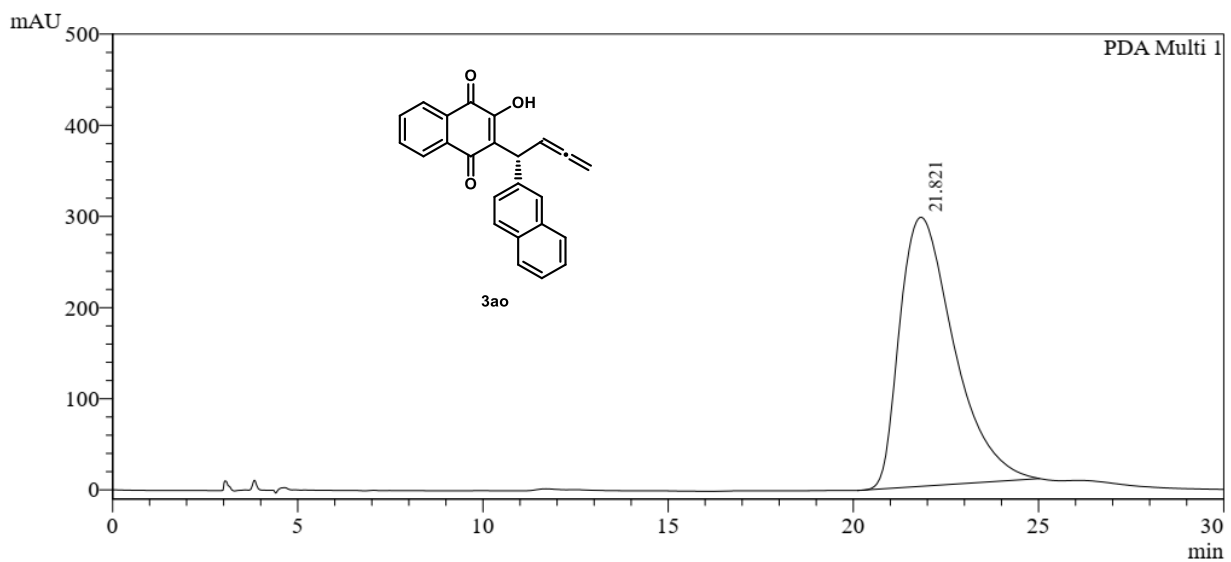

PeakTable

PDA Ch1 226nm 4nm

| Peak# | Ret. Time | Area     | Area %  |
|-------|-----------|----------|---------|
| 1     | 21.821    | 30131908 | 100.000 |
| Total |           | 30131908 | 100.000 |

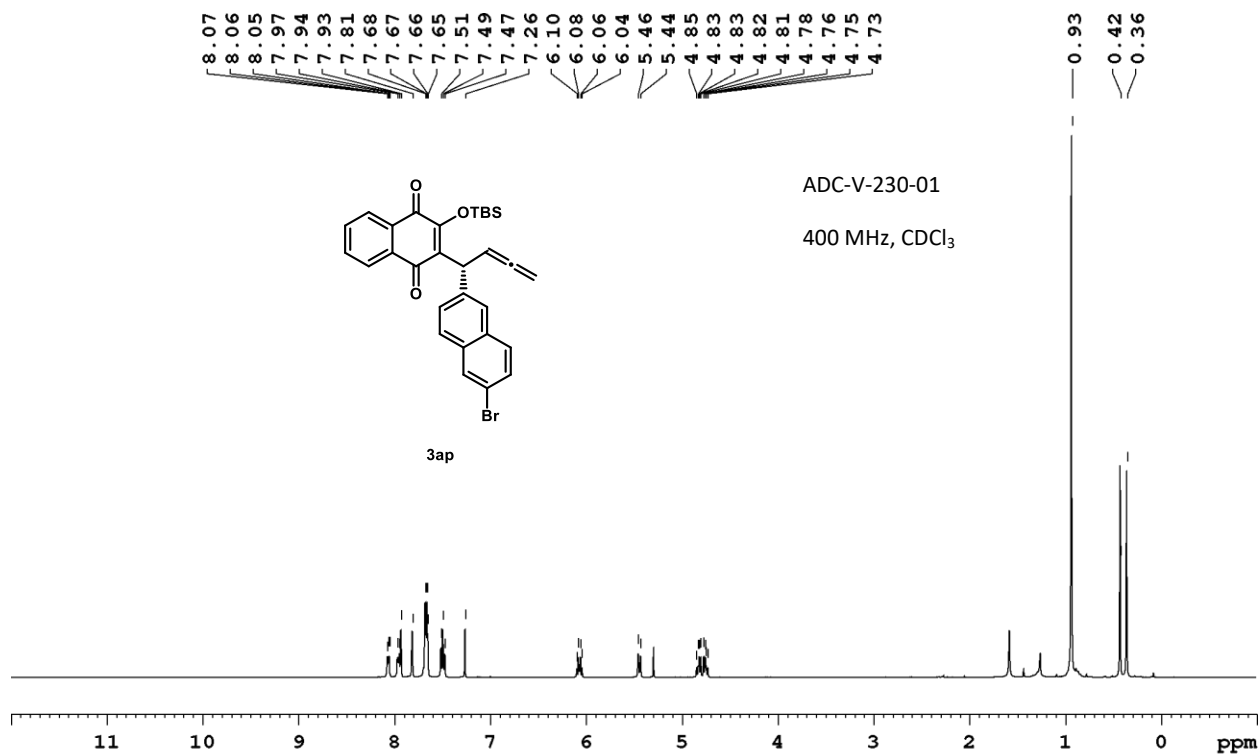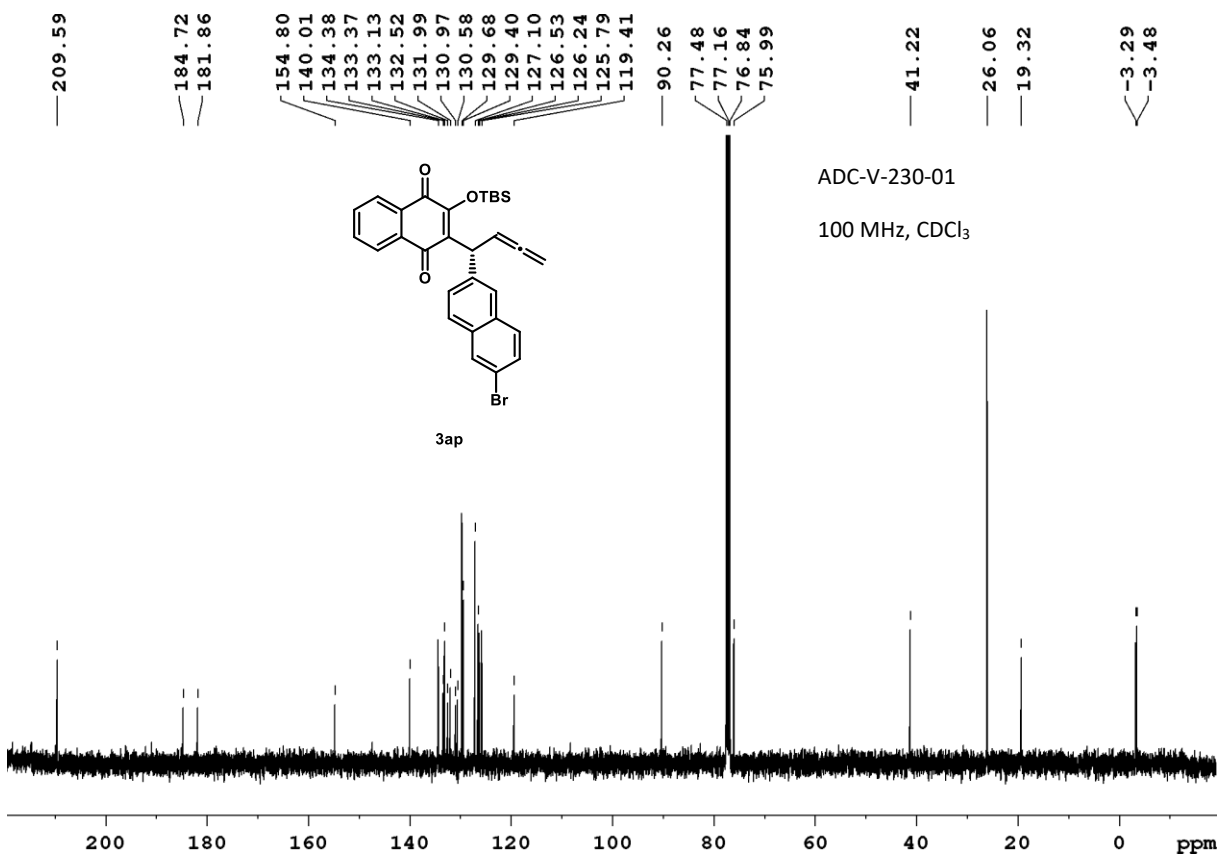

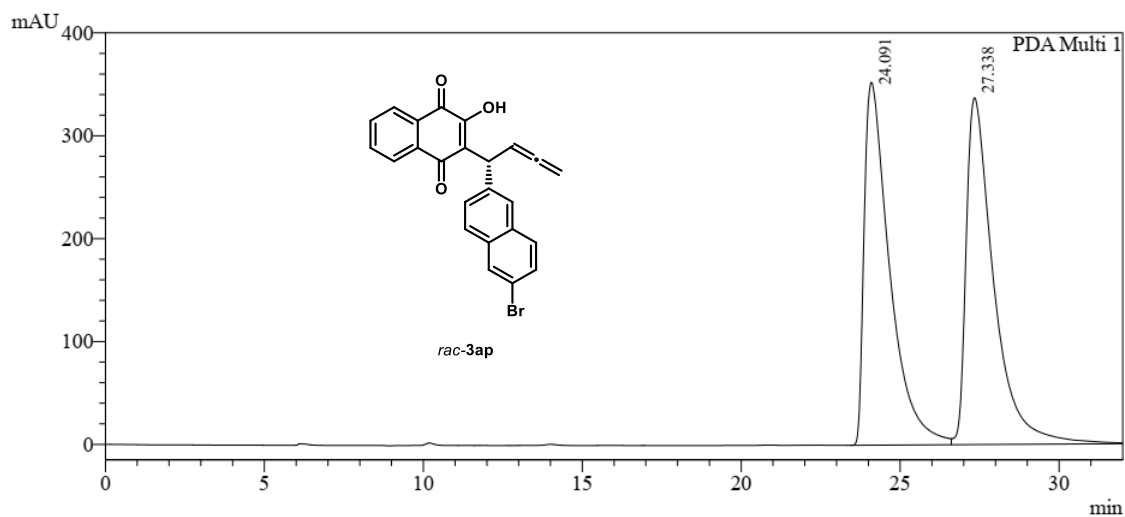

PDA Ch1 269nm 4nm

| Peak# | Ret. Time | Area     | Area %  |
|-------|-----------|----------|---------|
| 1     | 24.091    | 19718475 | 49.142  |
| 2     | 27.338    | 20406720 | 50.858  |
| Total |           | 40125195 | 100.000 |

Daicel Chiralpak AD-H column (90:10 *n*-Hexane/IPA, 1.0 mL/min, 20 °C)

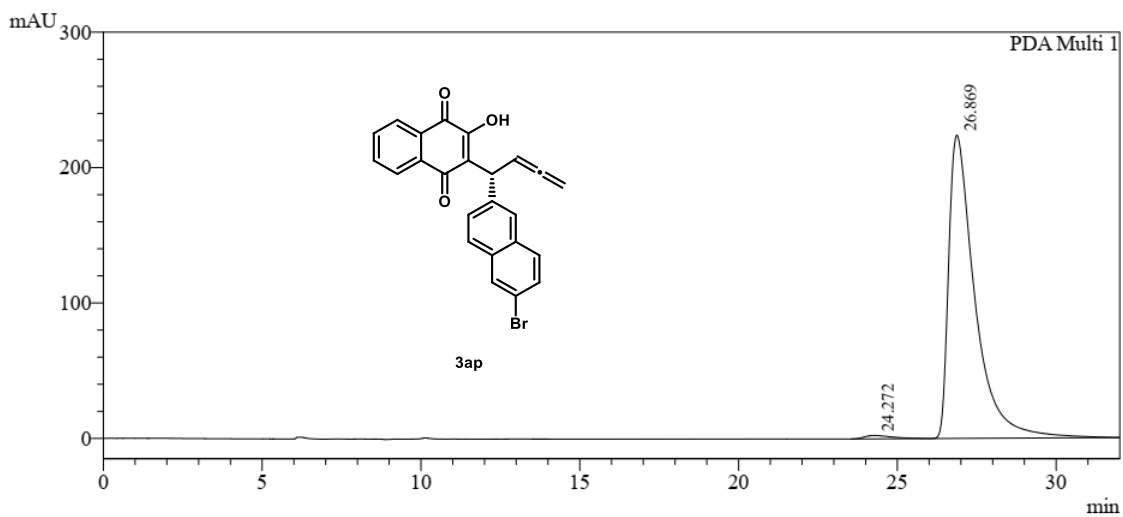

PDA Ch1 269nm 4nm

| Peak# | Ret. Time | Area     | Area %  |
|-------|-----------|----------|---------|
| 1     | 24.272    | 155762   | 1.195   |
| 2     | 26.869    | 12875140 | 98.805  |
| Total |           | 13030902 | 100.000 |

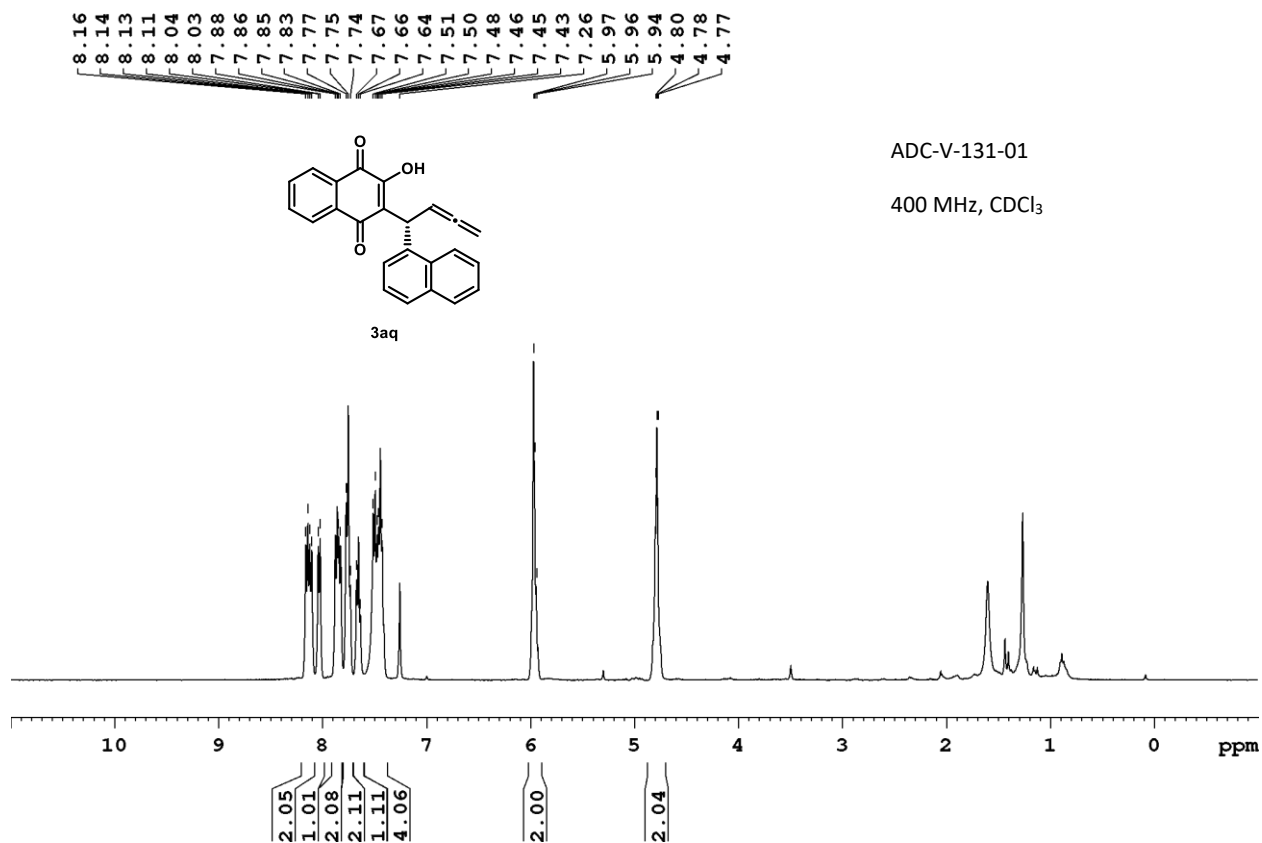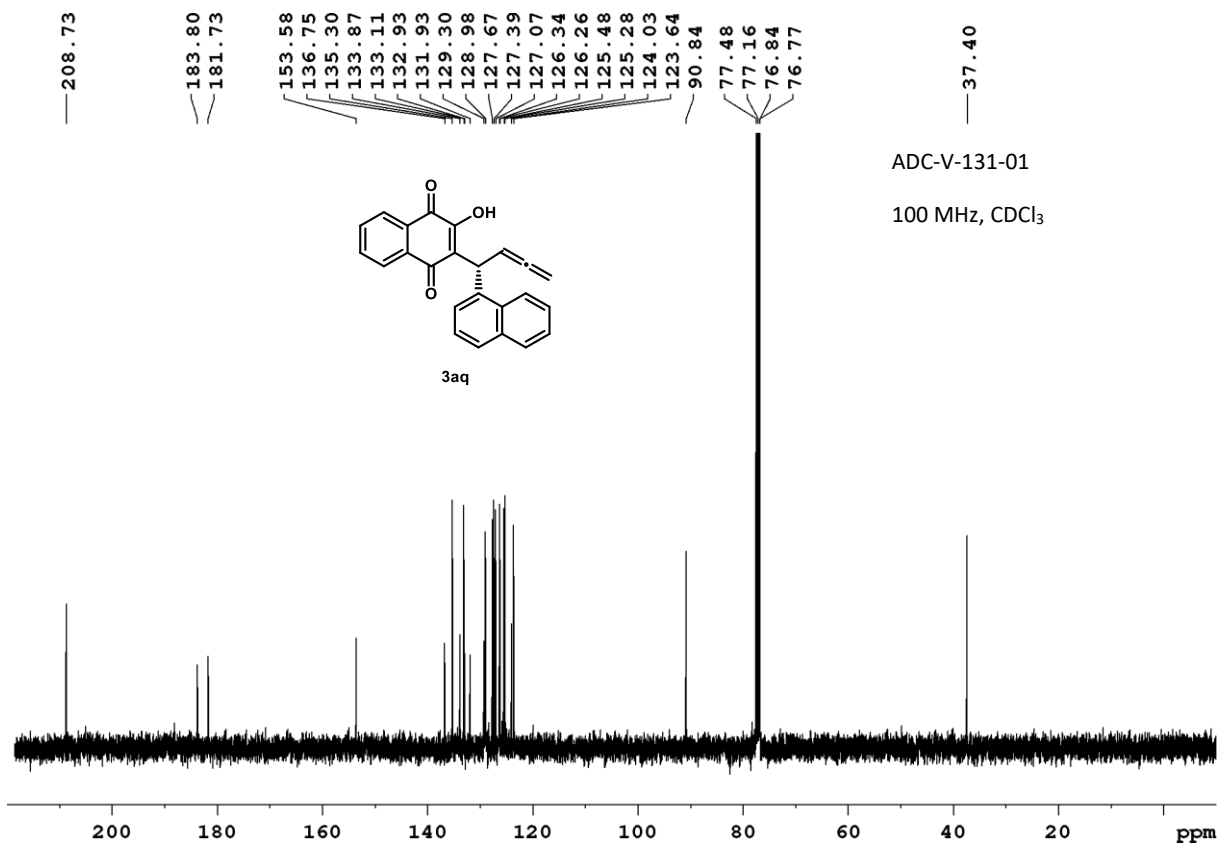

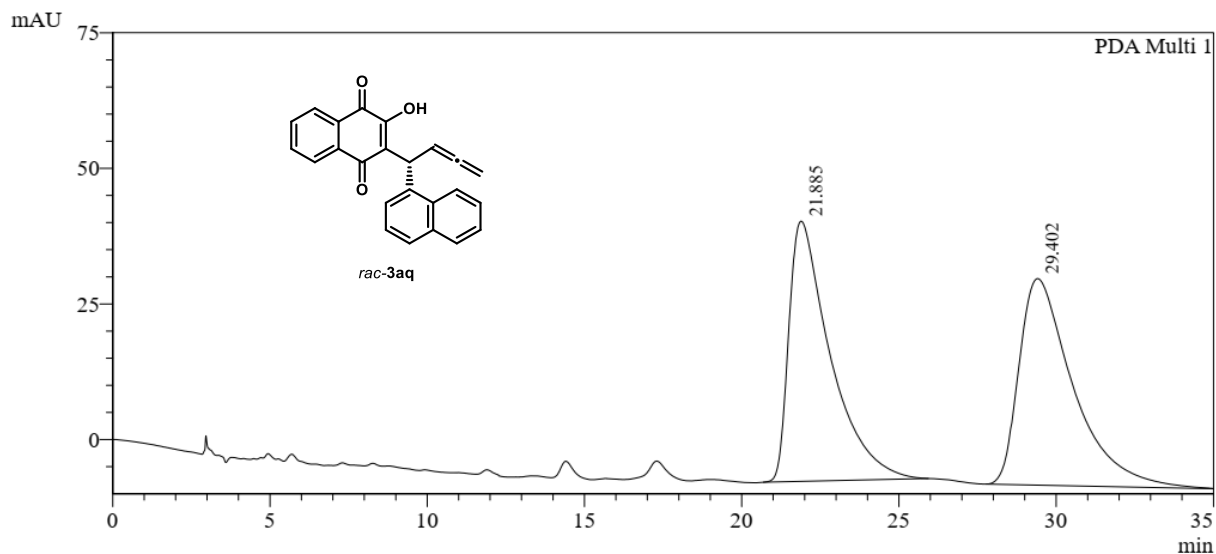

PeakTable

PDA Ch1 230nm 4nm

| Peak# | Ret. Time | Area    | Area %  |
|-------|-----------|---------|---------|
| 1     | 21.885    | 4376297 | 49.039  |
| 2     | 29.402    | 4547763 | 50.961  |
| Total |           | 8924061 | 100.000 |

Daicel Chiralpak AD-H column (90:10 *n*-Hexane/IPA, 1.0 mL/min, 20 °C)

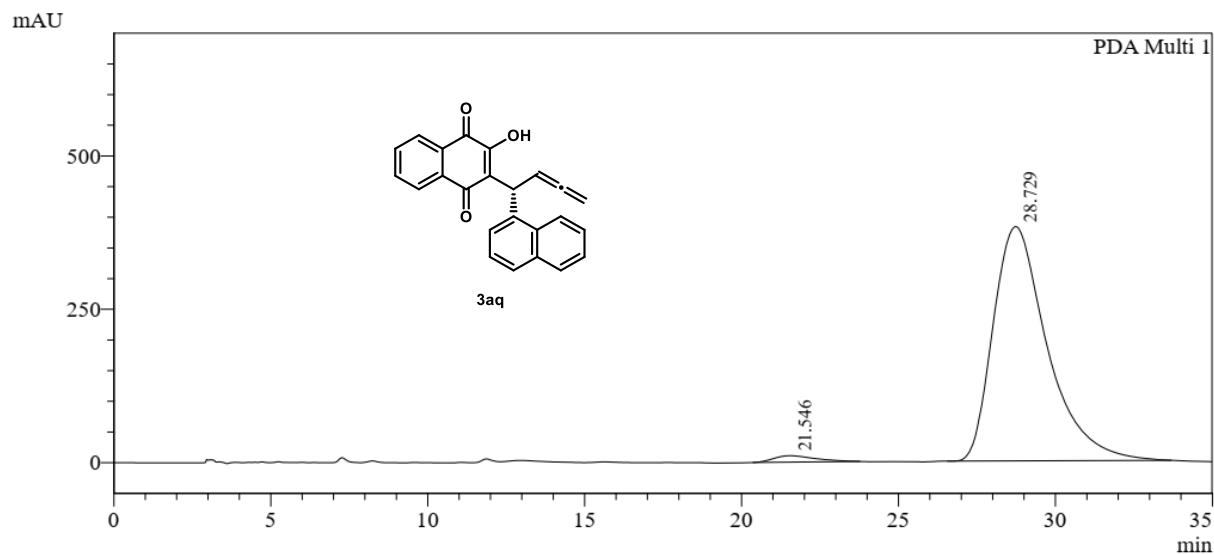

PeakTable

PDA Ch1 230nm 4nm

| Peak# | Ret. Time | Area     | Area %  |
|-------|-----------|----------|---------|
| 1     | 21.546    | 971563   | 2.078   |
| 2     | 28.729    | 45789679 | 97.922  |
| Total |           | 46761242 | 100.000 |

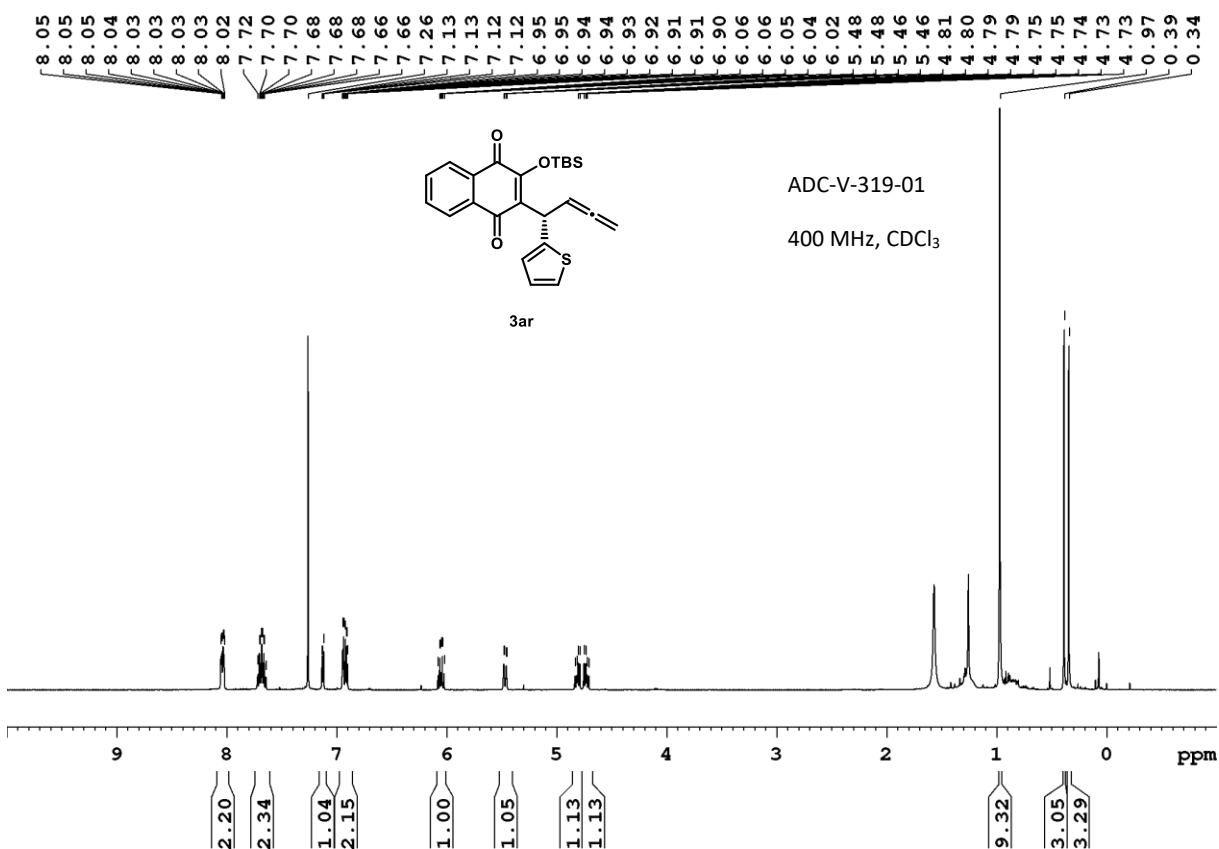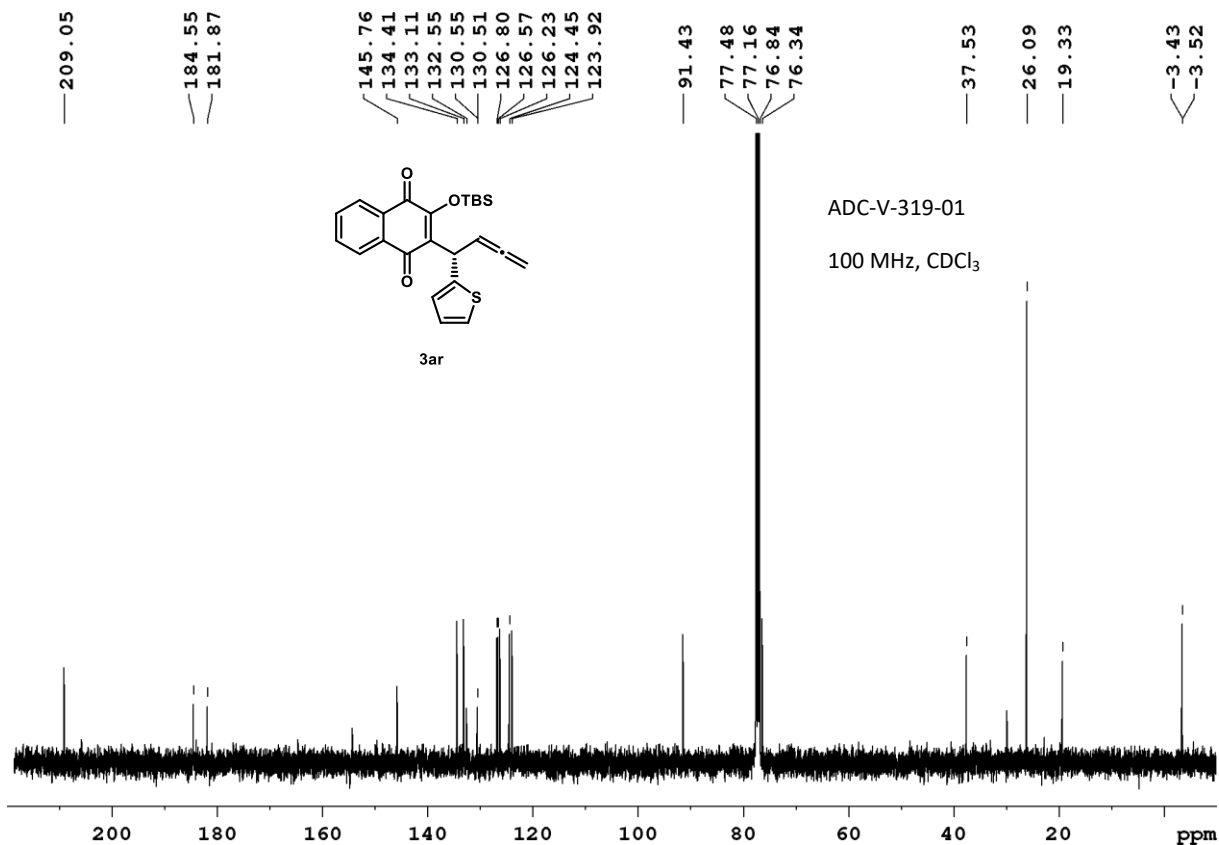

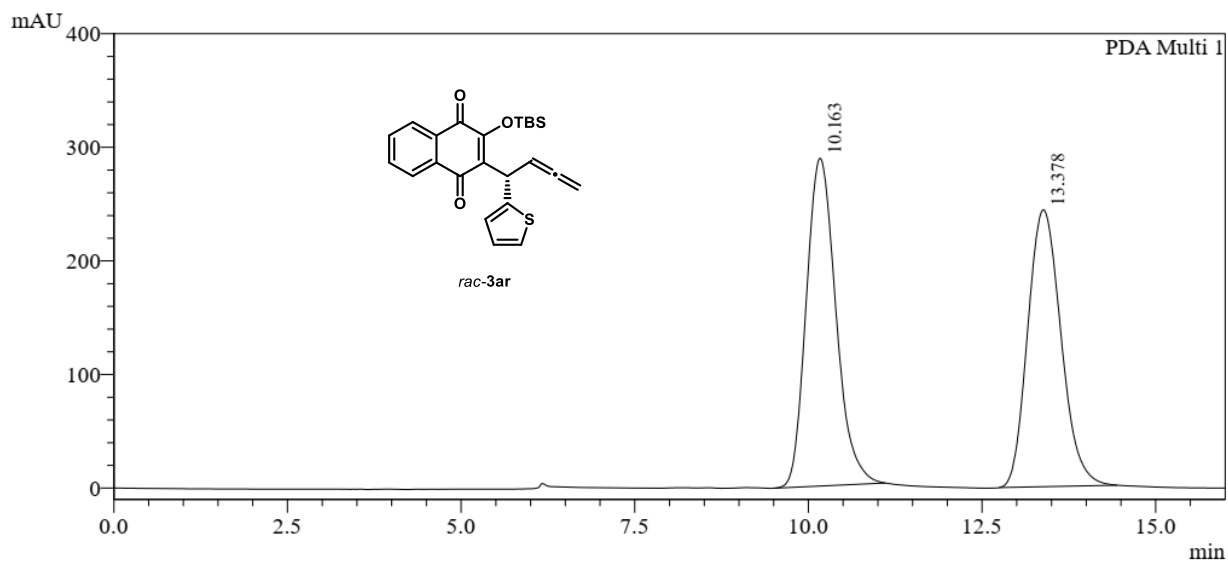

PeakTable

PDA Ch1 254nm 4nm

| Peak# | Ret. Time | Area     | Area %  |
|-------|-----------|----------|---------|
| 1     | 10.163    | 8571539  | 51.346  |
| 2     | 13.378    | 8122274  | 48.654  |
| Total |           | 16693813 | 100.000 |

Phenomenex Cellulose-2 column (99:1 *n*-Hexane/IPA, 0.5 mL/min, 20 °C)

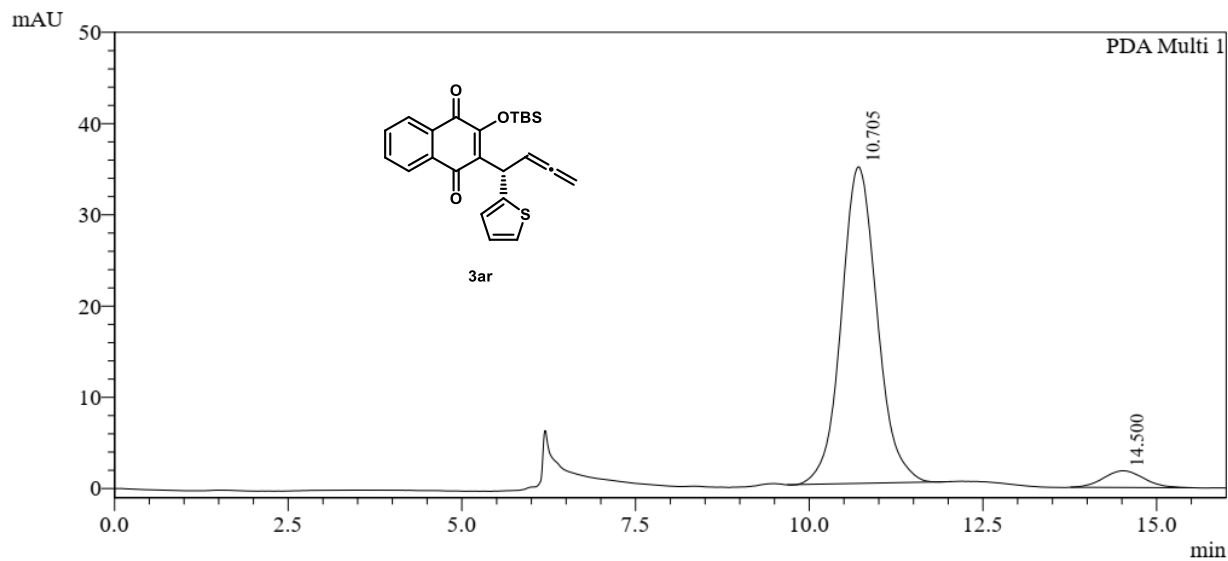

PeakTable

PDA Ch1 254nm 4nm

| Peak# | Ret. Time | Area    | Area %  |
|-------|-----------|---------|---------|
| 1     | 10.705    | 1244429 | 94.433  |
| 2     | 14.500    | 73357   | 5.567   |
| Total |           | 1317786 | 100.000 |

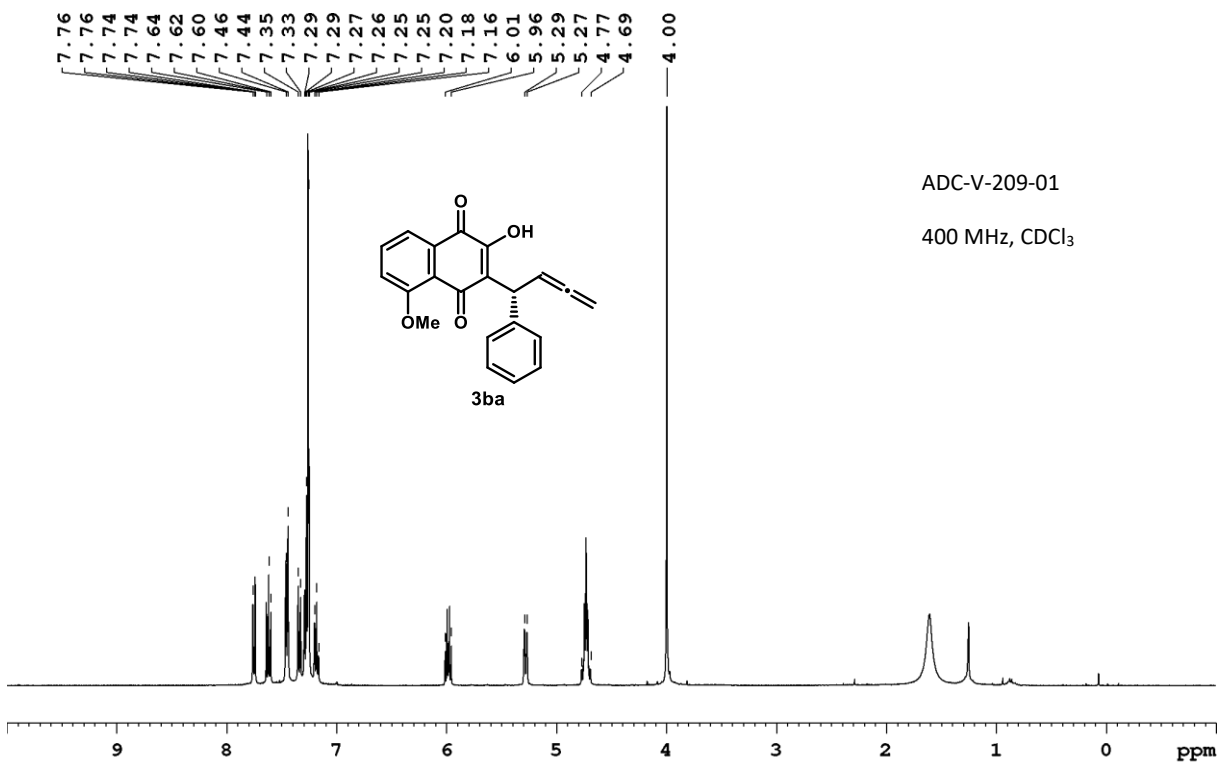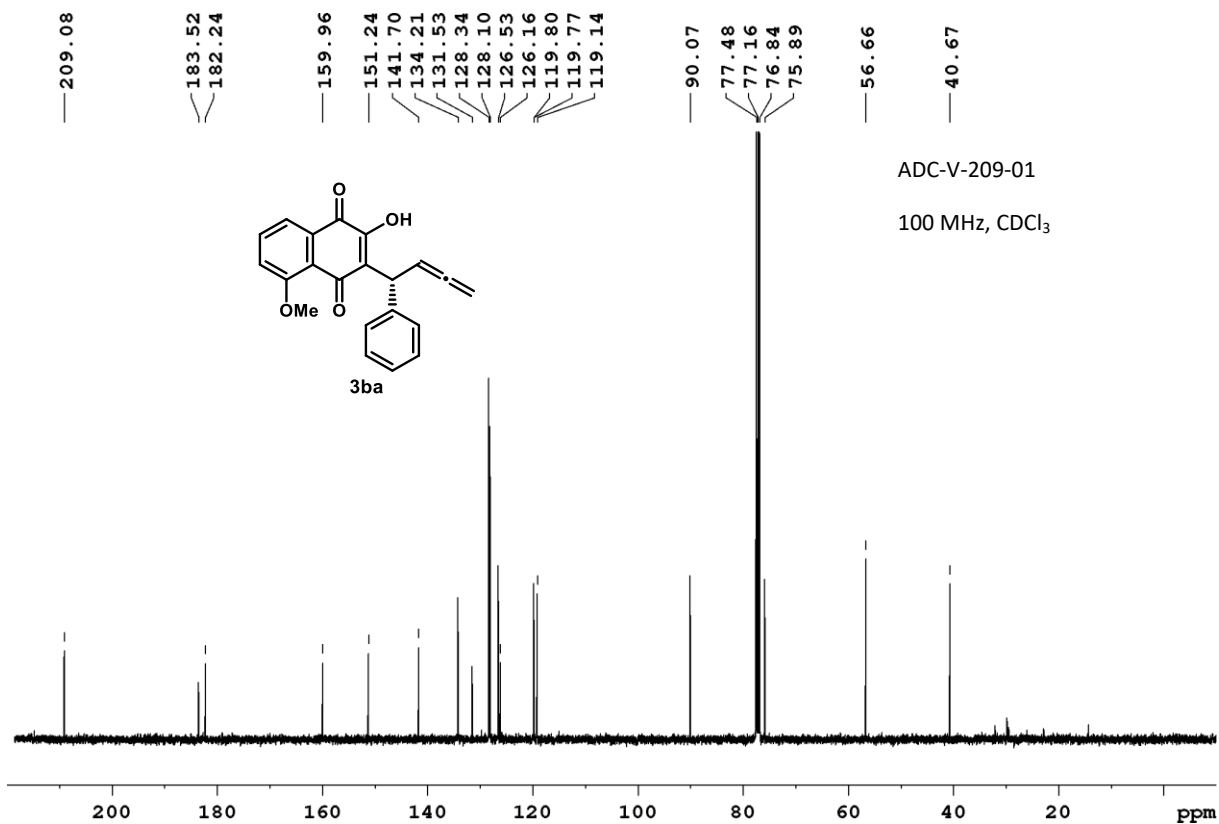

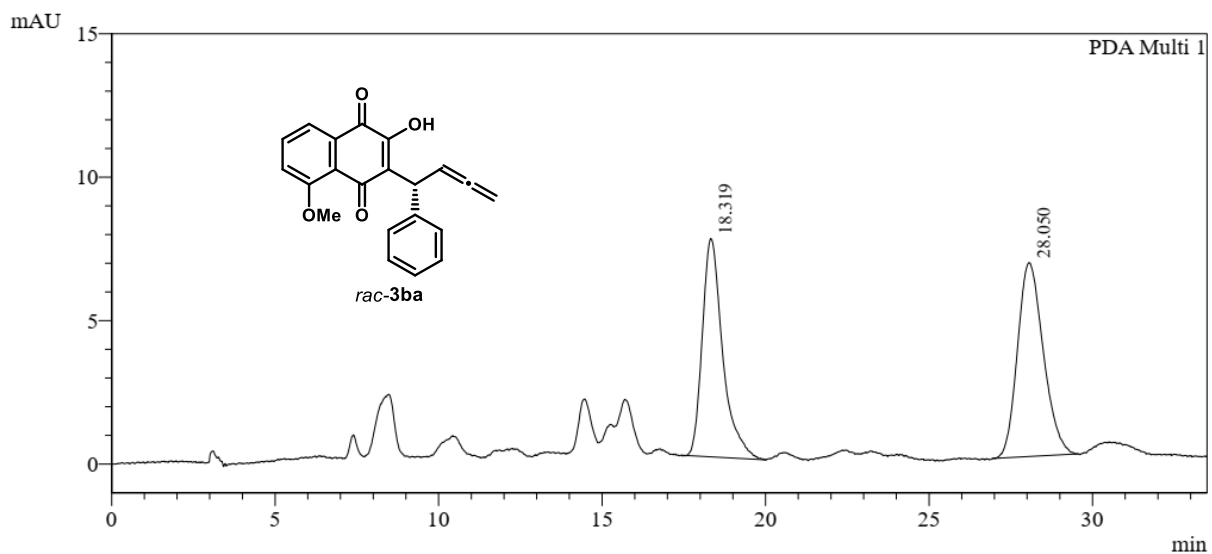

PeakTable

PDA Ch1 343nm 4nm

| Peak# | Ret. Time | Area   | Area %  |
|-------|-----------|--------|---------|
| 1     | 18.319    | 330182 | 47.063  |
| 2     | 28.050    | 371386 | 52.937  |
| Total |           | 701568 | 100.000 |

Daicel Chiralpak AD-H column (90:10 *n*-Hexane/IPA, 1.0 mL/min, 20 °C)

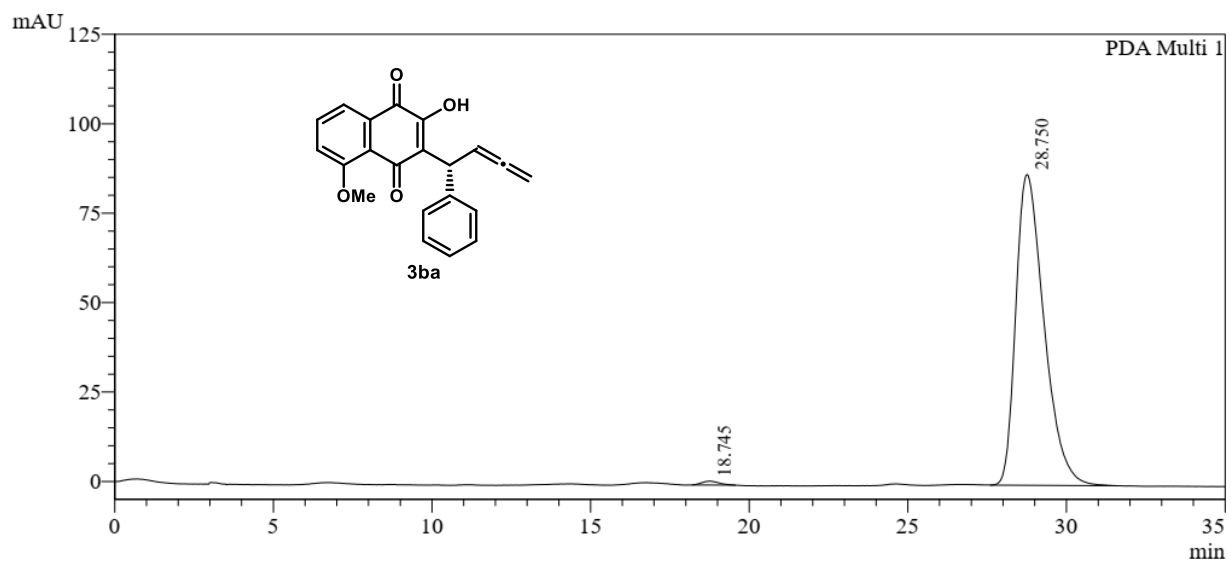

PeakTable

PDA Ch1 343nm 4nm

| Peak# | Ret. Time | Area    | Area %  |
|-------|-----------|---------|---------|
| 1     | 18.745    | 41320   | 0.763   |
| 2     | 28.750    | 5372226 | 99.237  |
| Total |           | 5413546 | 100.000 |

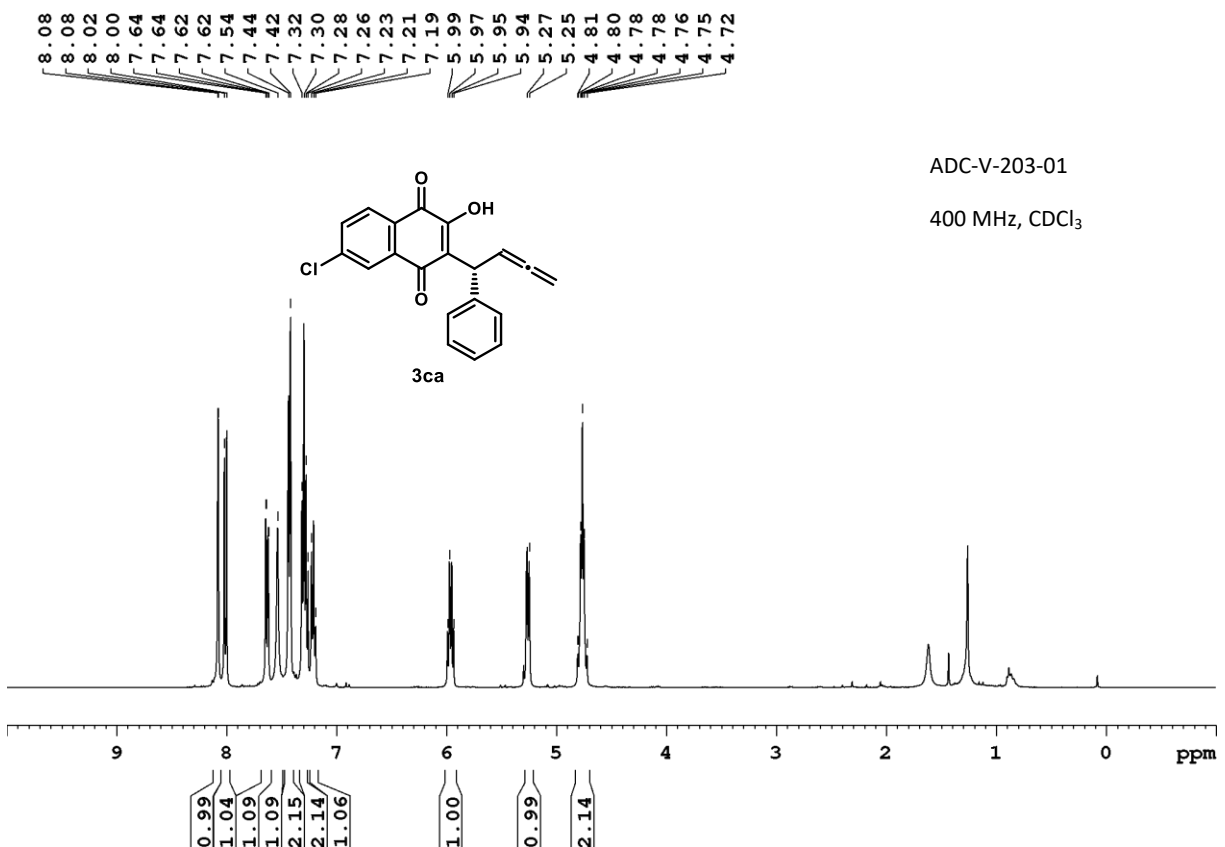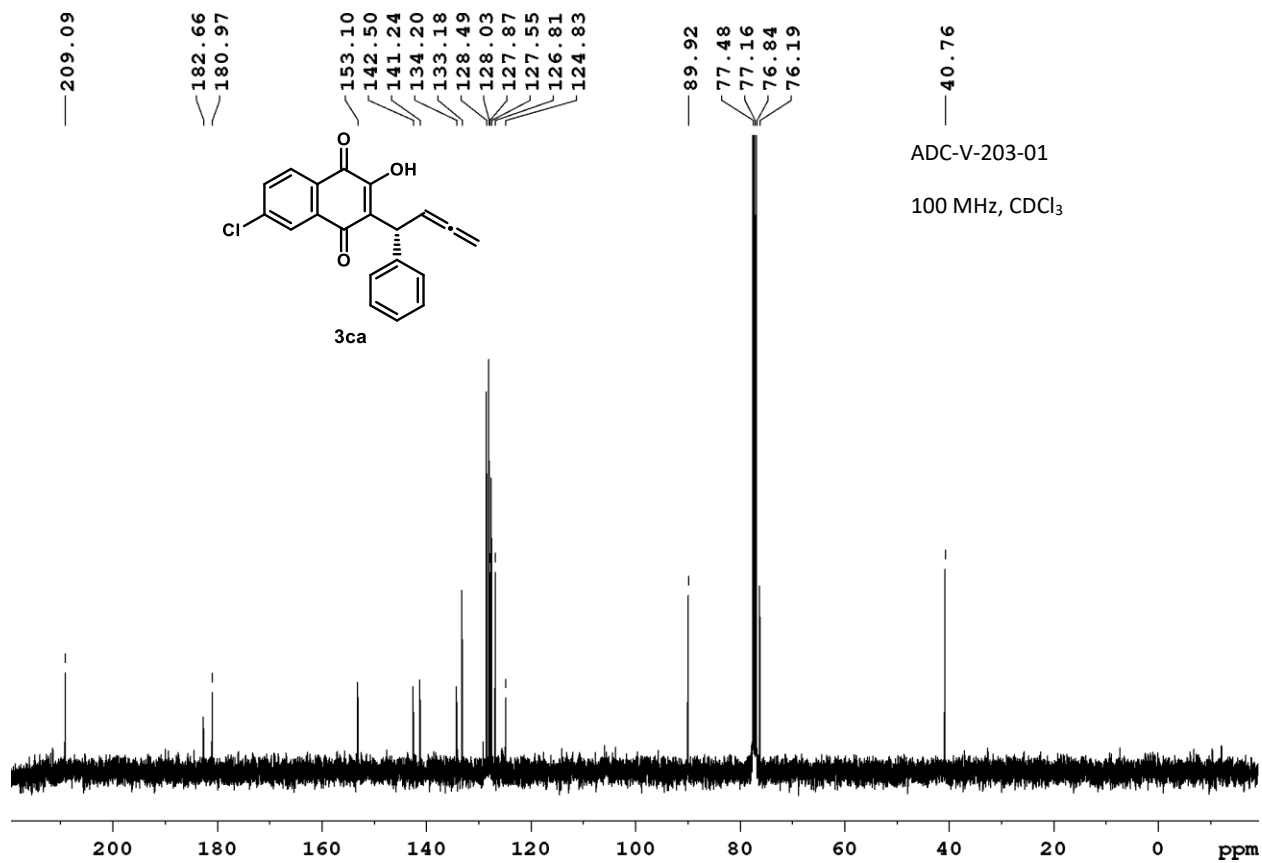

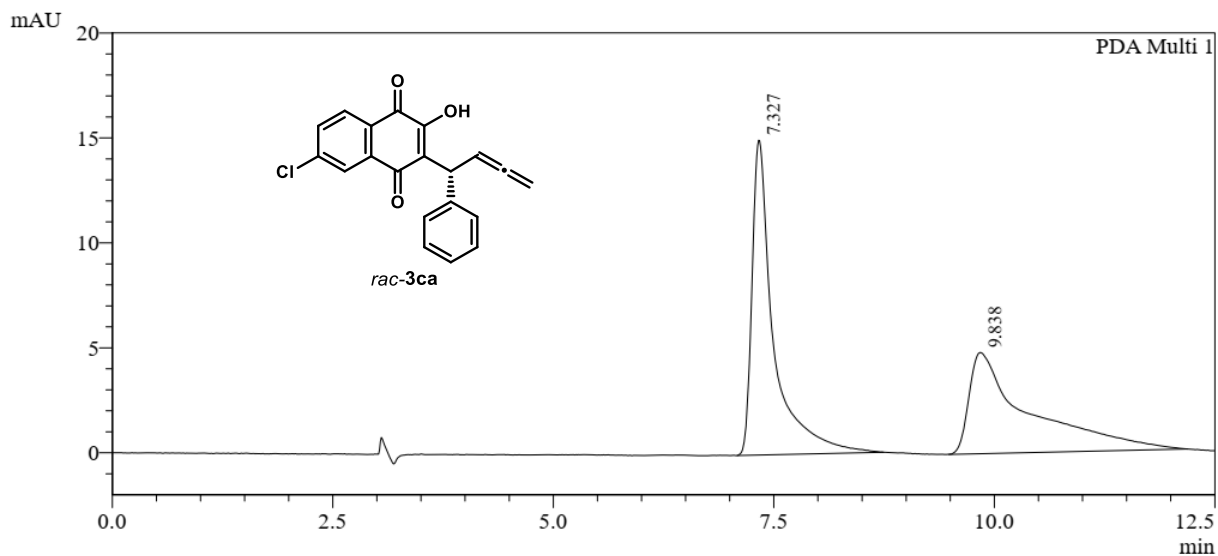

PeakTable

PDA Ch1 380nm 4nm

| Peak# | Ret. Time | Area   | Area %  |
|-------|-----------|--------|---------|
| 1     | 7.327     | 255333 | 52.868  |
| 2     | 9.838     | 227632 | 47.132  |
| Total |           | 482965 | 100.000 |

Daicel Chiralpak IK column (90:10 *n*-Hexane/IPA, 1.0 mL/min, 20 °C)

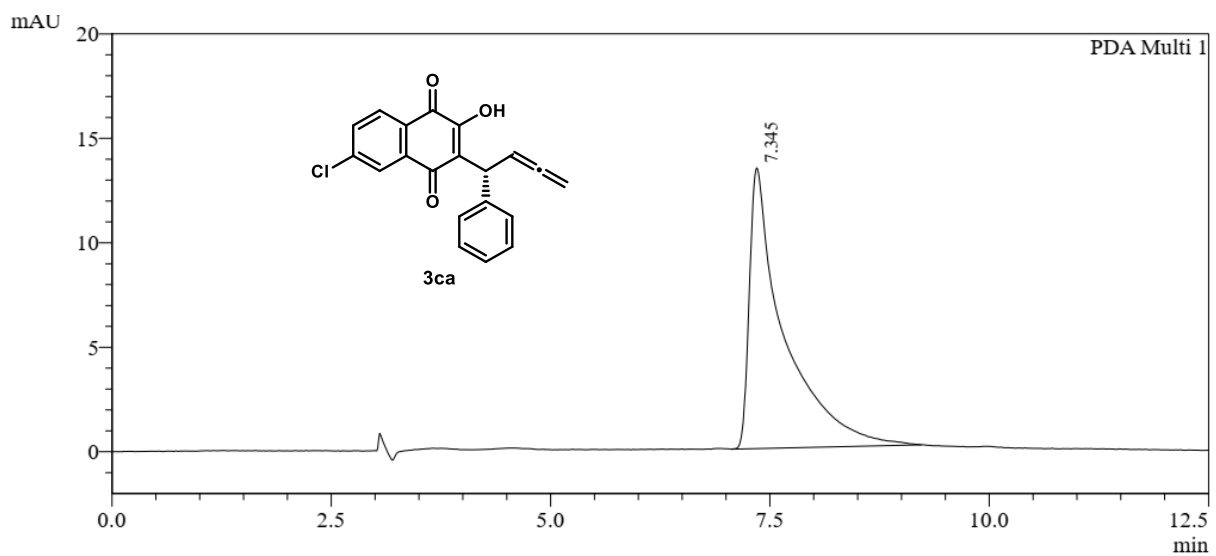

PeakTable

PDA Ch1 380nm 4nm

| Peak# | Ret. Time | Area   | Area %  |
|-------|-----------|--------|---------|
| 1     | 7.345     | 368893 | 100.000 |
| Total |           | 368893 | 100.000 |

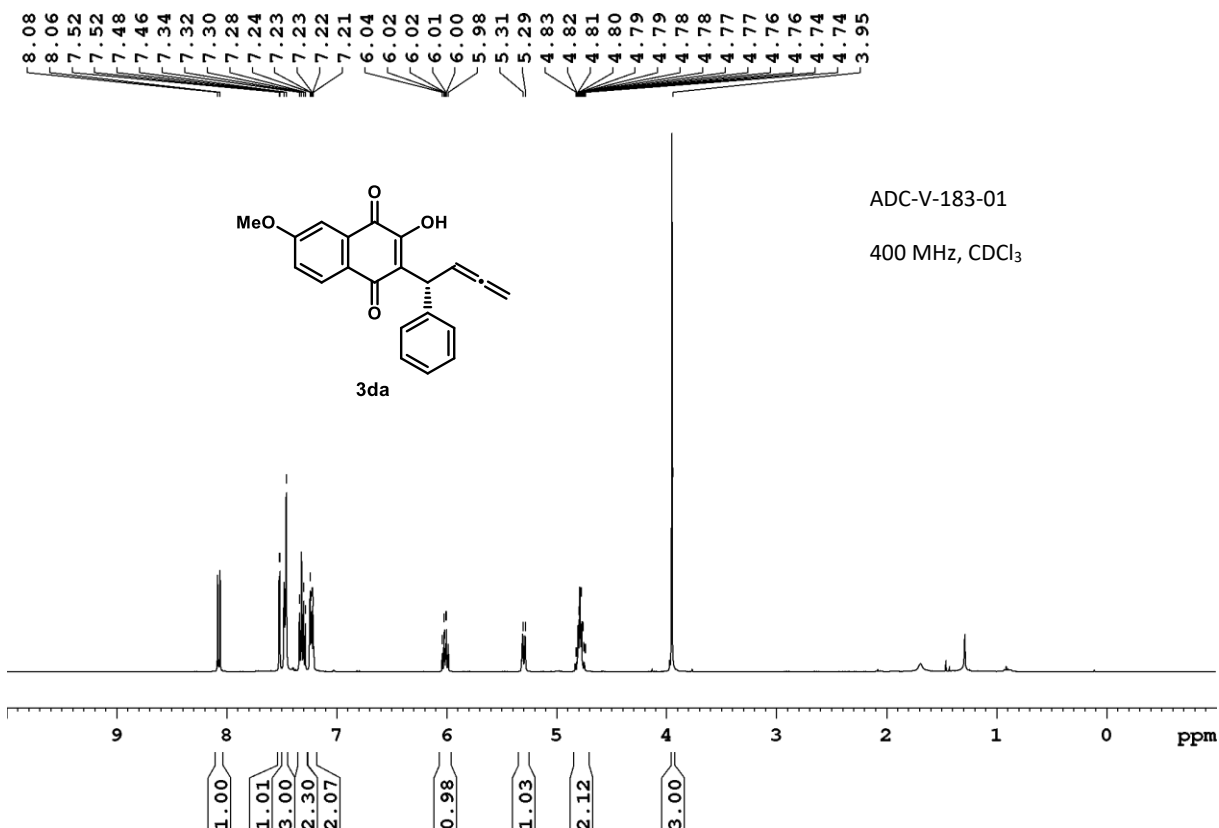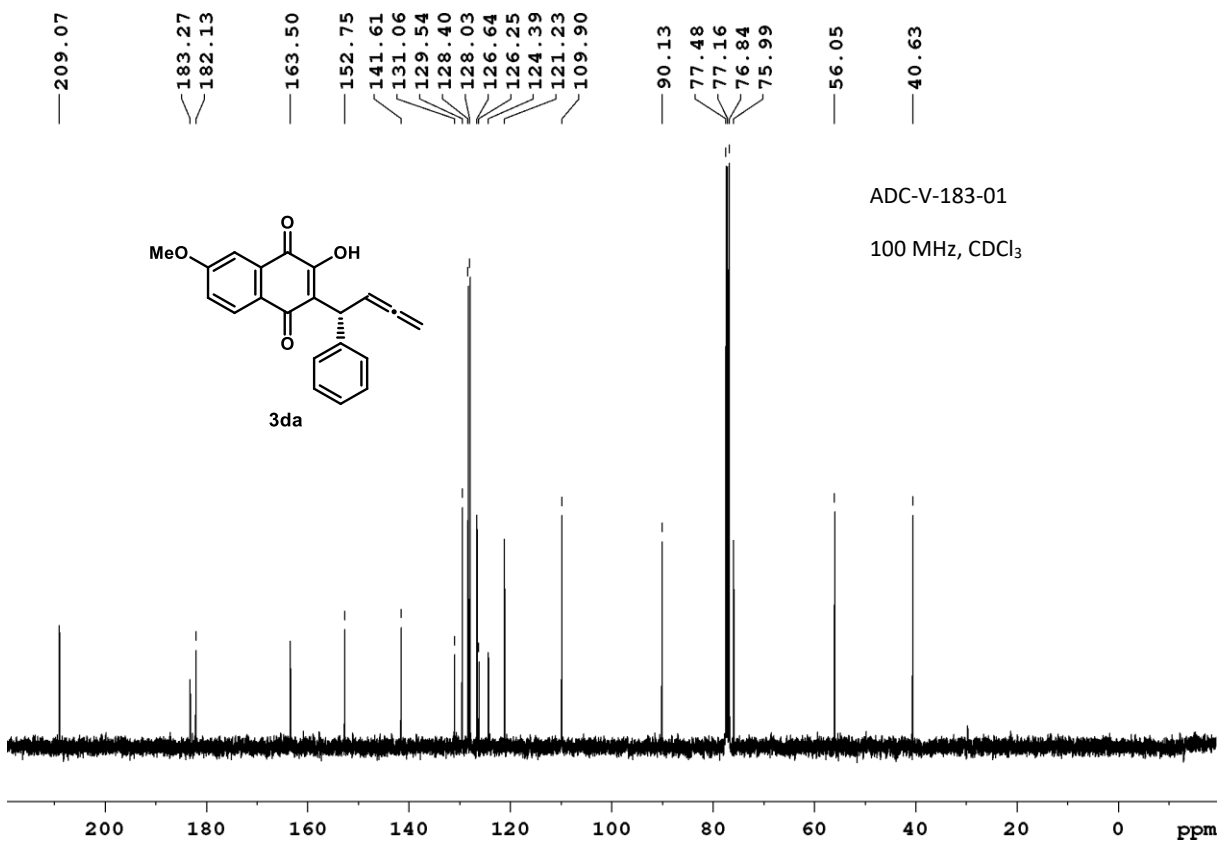

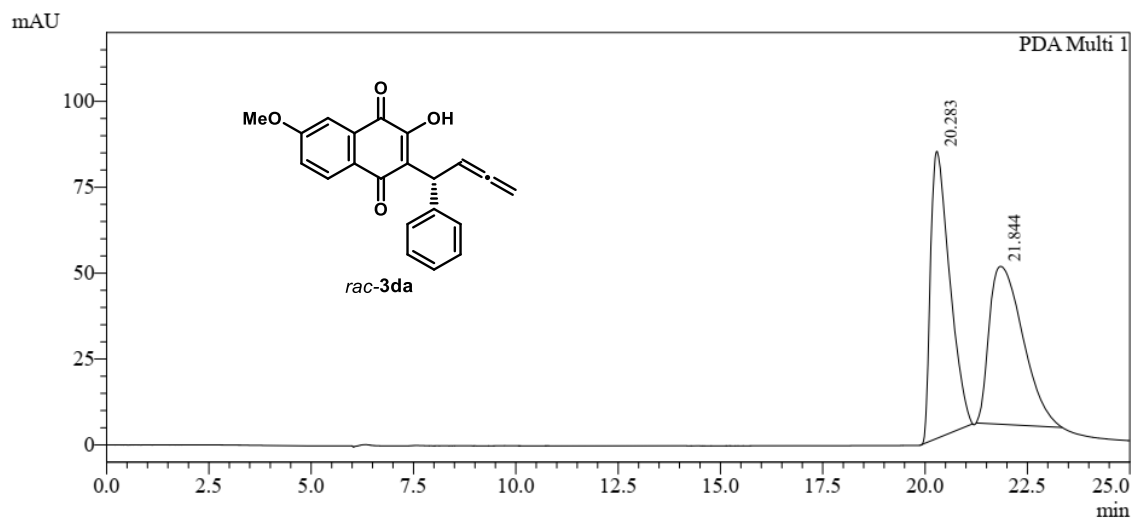

PDA Ch1 327nm 4nm

| Peak# | Ret. Time | Area    | Area %  |
|-------|-----------|---------|---------|
| 1     | 20.283    | 2727231 | 50.750  |
| 2     | 21.844    | 2646668 | 49.250  |
| Total |           | 5373899 | 100.000 |

Daicel Chiralpak IK column (90:10 *n*-Hexane/IPA, 1.0 mL/min, 20 °C)

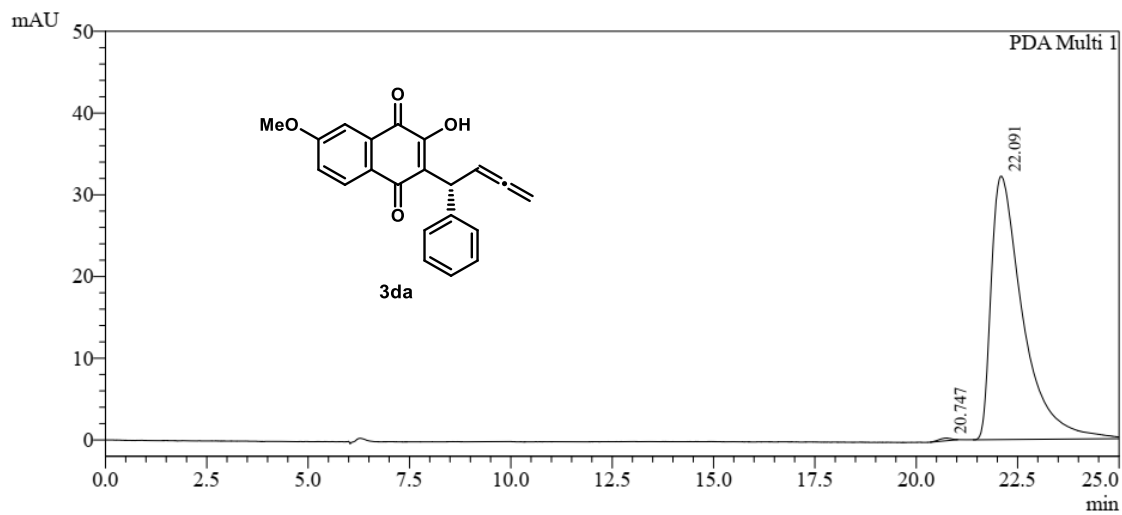

PDA Ch1 327nm 4nm

| Peak# | Ret. Time | Area    | Area %  |
|-------|-----------|---------|---------|
| 1     | 20.747    | 6827    | 0.388   |
| 2     | 22.091    | 1754276 | 99.612  |
| Total |           | 1761102 | 100.000 |

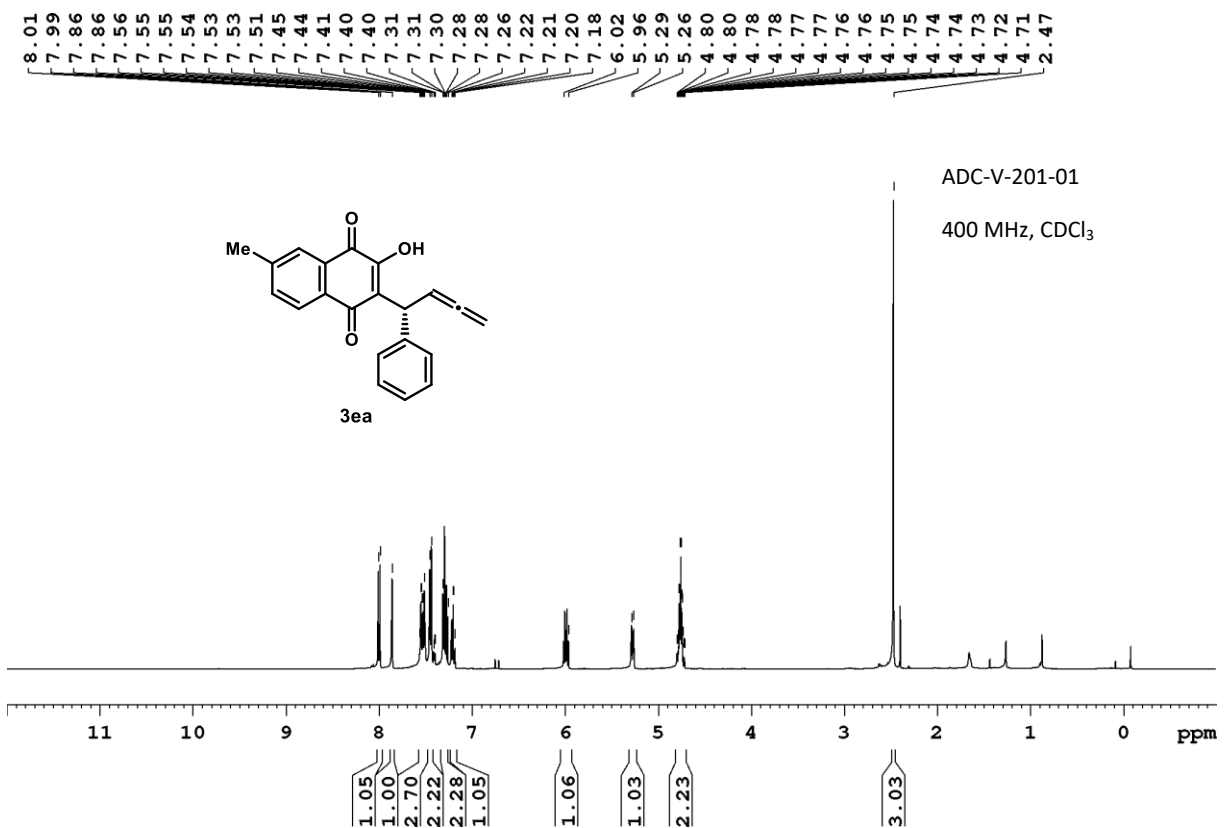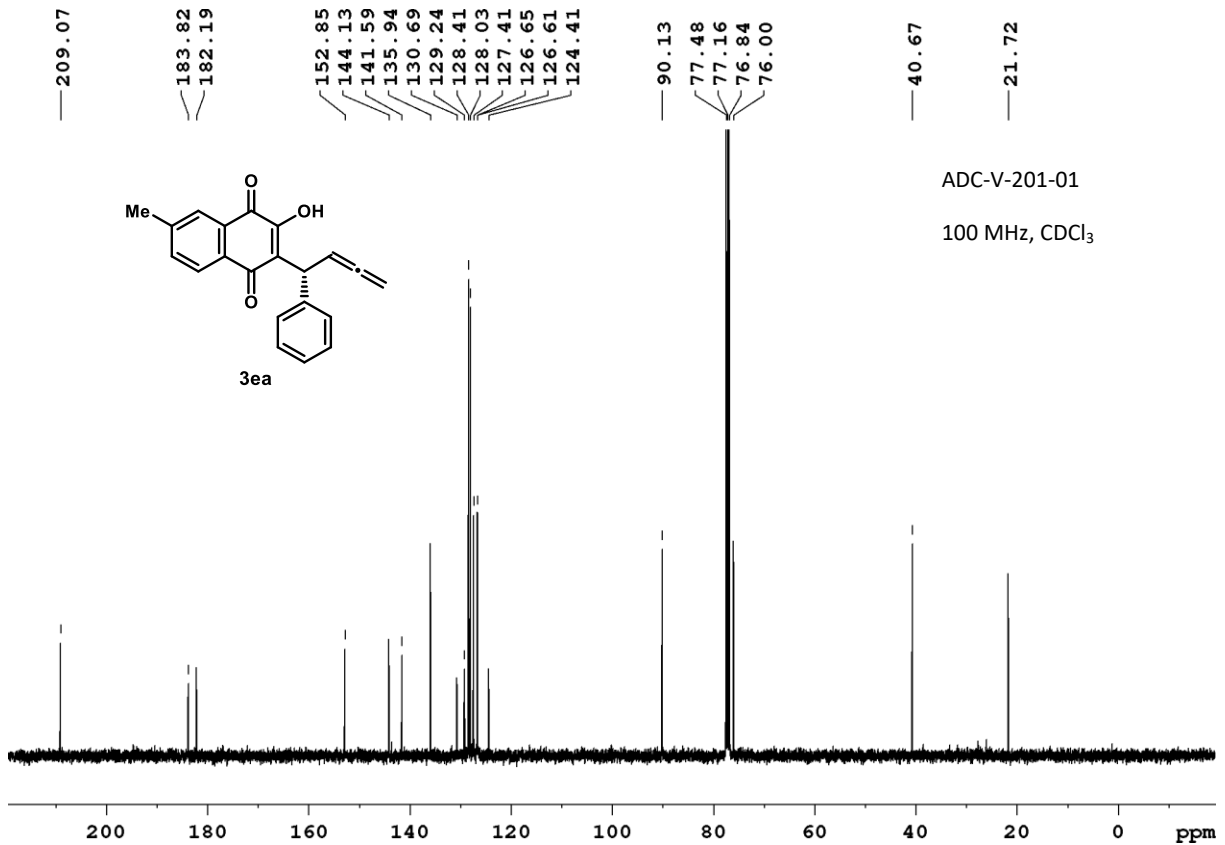

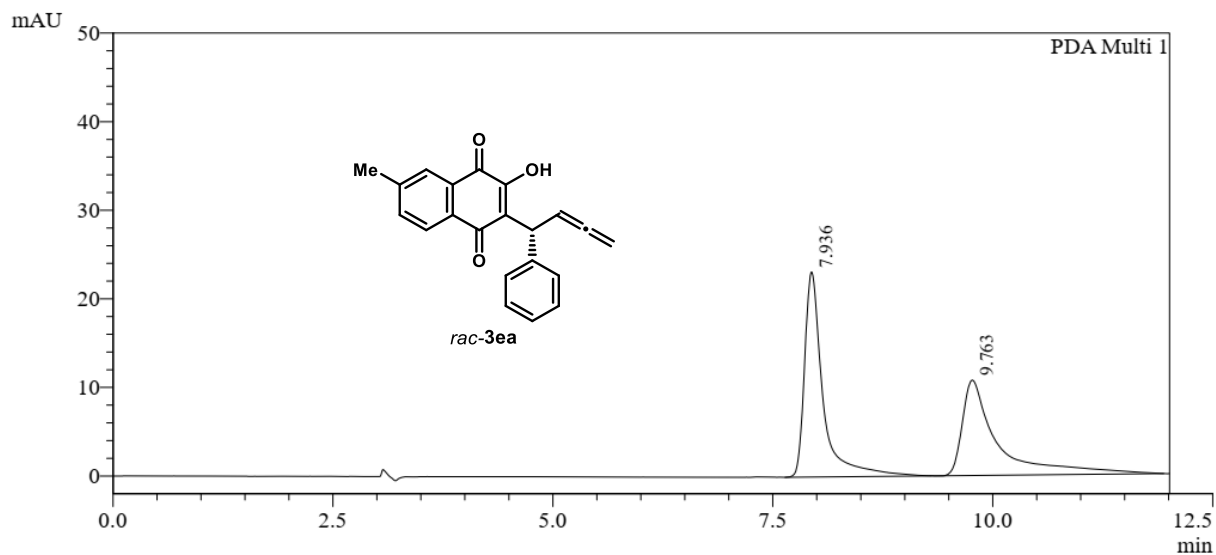

PeakTable

PDA Ch1 380nm 4nm

| Peak# | Ret. Time | Area   | Area %  |
|-------|-----------|--------|---------|
| 1     | 7.936     | 339850 | 52.976  |
| 2     | 9.763     | 301662 | 47.024  |
| Total |           | 641512 | 100.000 |

Daicel Chiralpak IK column (90:10 *n*-Hexane/IPA, 1.0 mL/min, 20 °C)

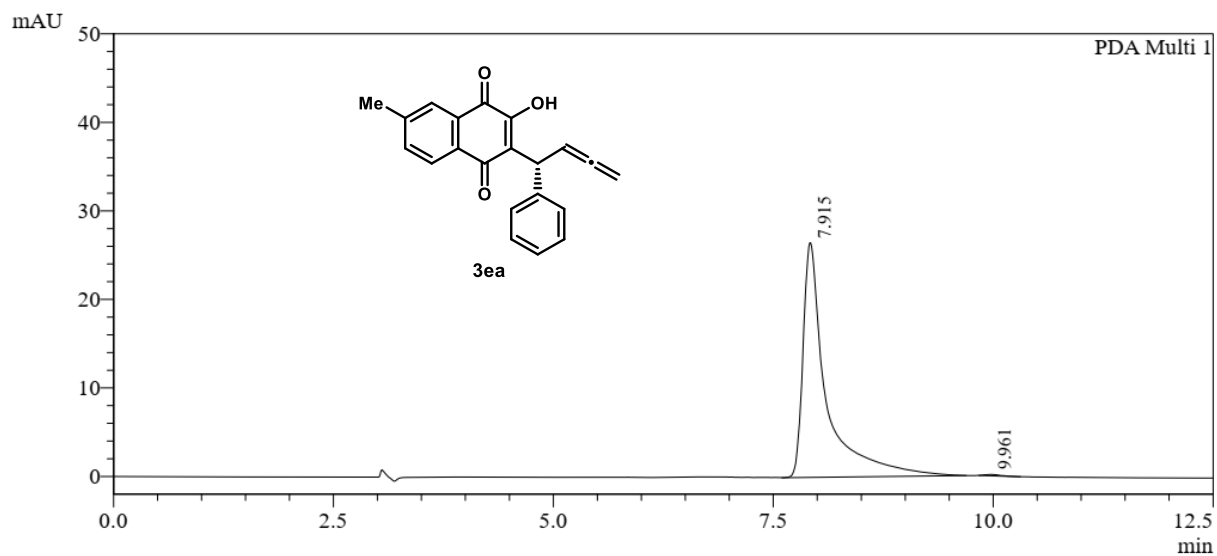

PeakTable

PDA Ch1 380nm 4nm

| Peak# | Ret. Time | Area   | Area %  |
|-------|-----------|--------|---------|
| 1     | 7.915     | 492275 | 99.633  |
| 2     | 9.961     | 1813   | 0.367   |
| Total |           | 494088 | 100.000 |

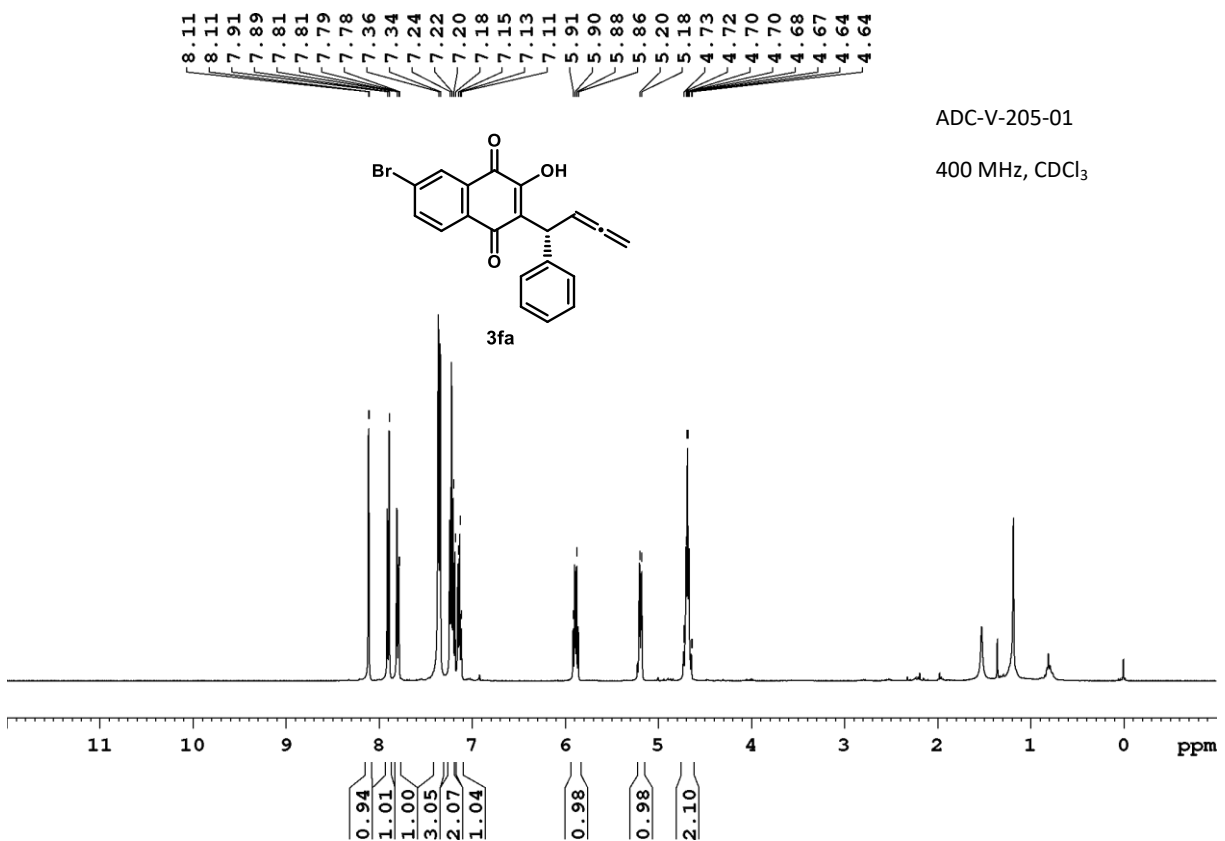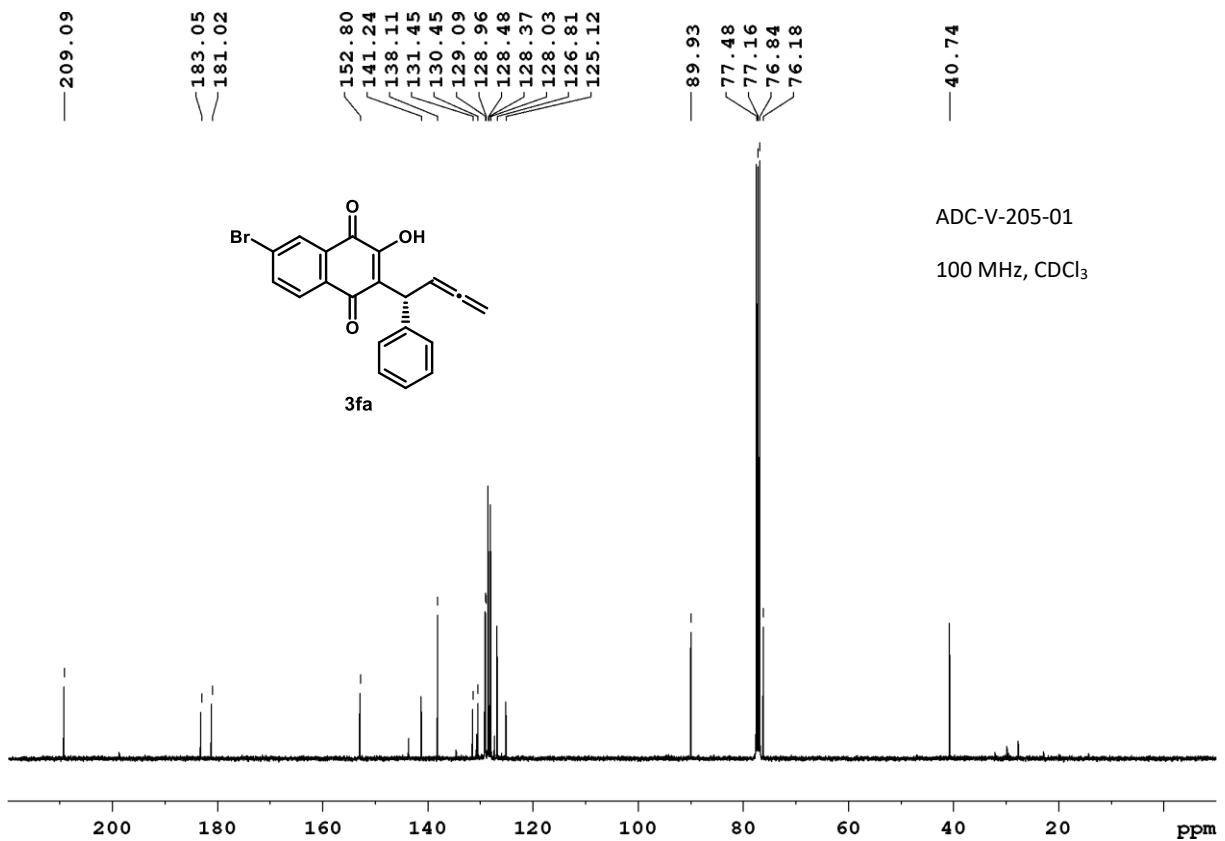

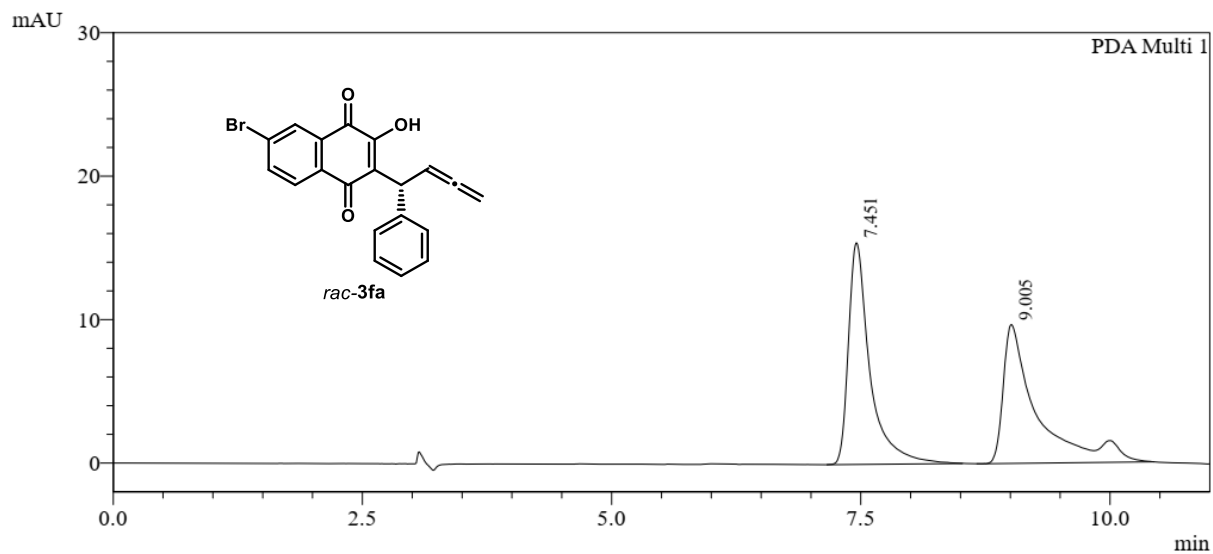

PeakTable

PDA Ch1 380nm 4nm

| Peak# | Ret. Time | Area   | Area %  |
|-------|-----------|--------|---------|
| 1     | 7.451     | 231788 | 50.170  |
| 2     | 9.005     | 230213 | 49.830  |
| Total |           | 462002 | 100.000 |

Daicel Chiralpak IK column (90:10 *n*-Hexane/IPA, 1.0 mL/min, 20 °C)

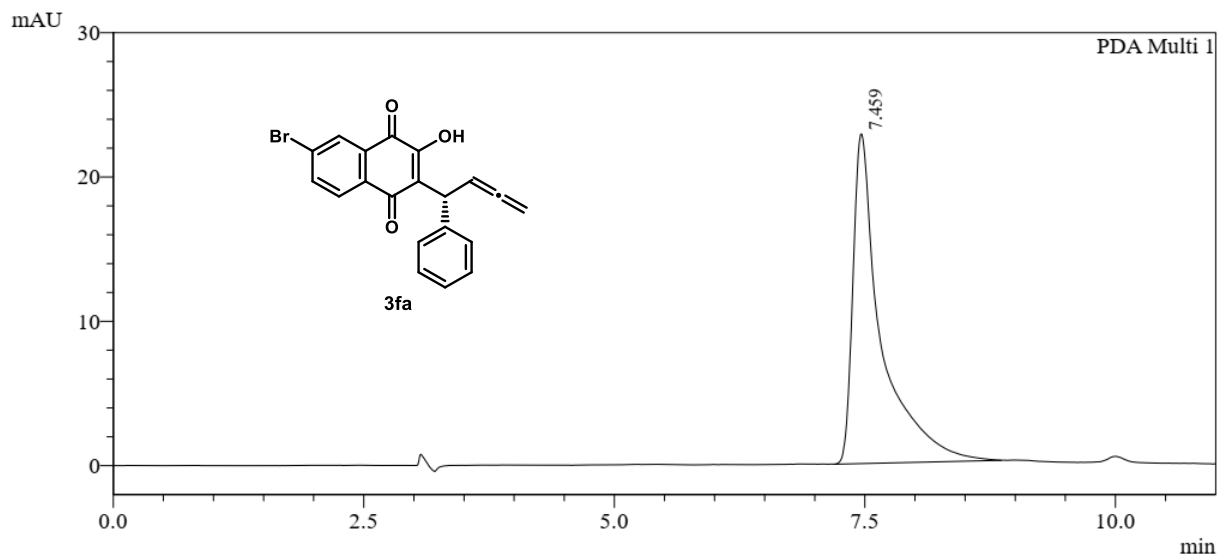

PeakTable

PDA Ch1 380nm 4nm

| Peak# | Ret. Time | Area   | Area %  |
|-------|-----------|--------|---------|
| 1     | 7.459     | 447670 | 100.000 |
| Total |           | 447670 | 100.000 |

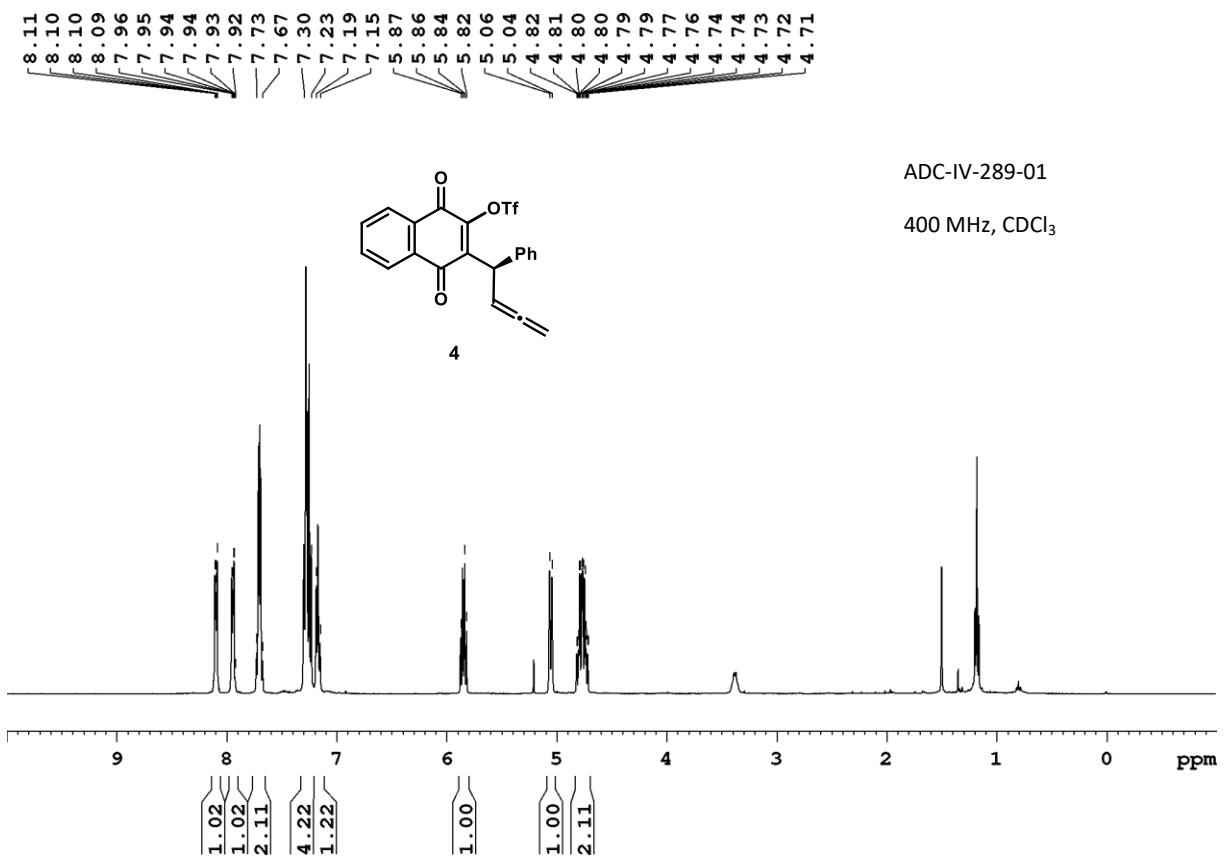

ADC-IV-289-01

400 MHz, CDCl<sub>3</sub>

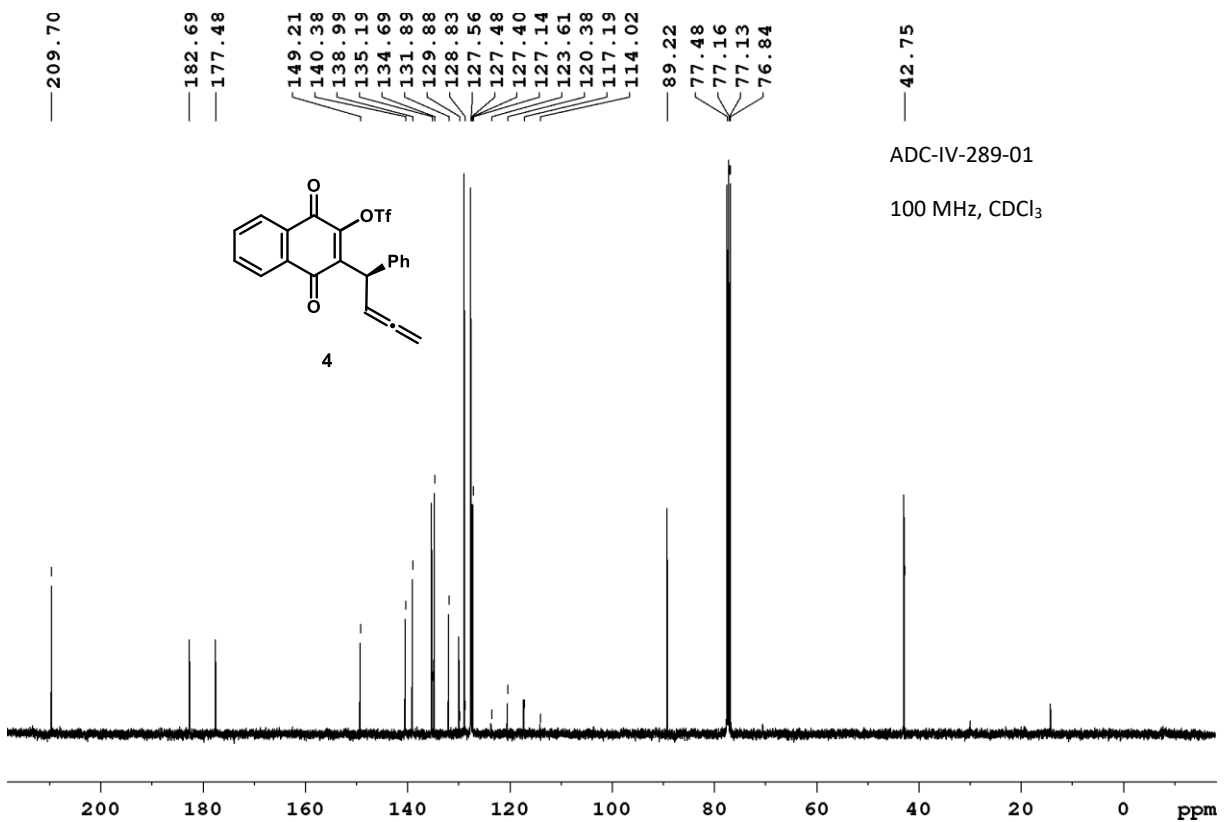

ADC-IV-289-01

100 MHz, CDCl<sub>3</sub>

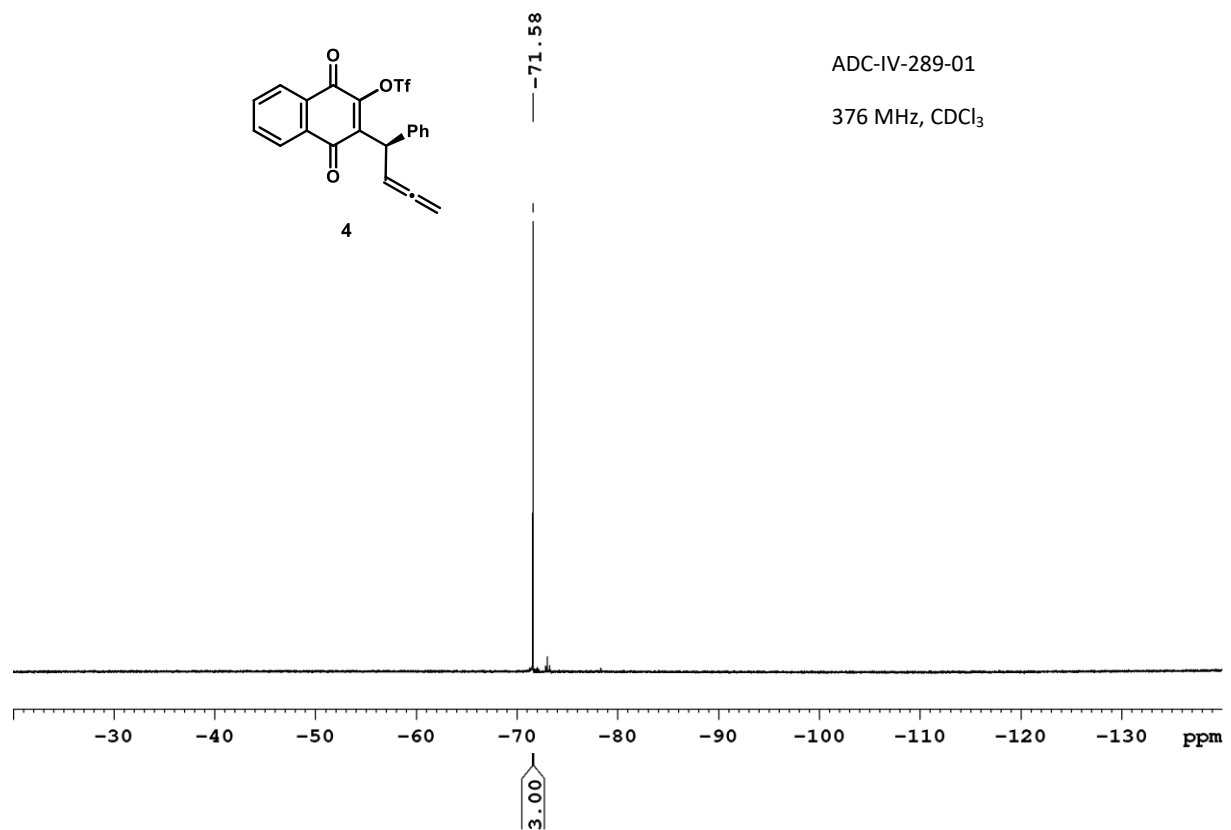

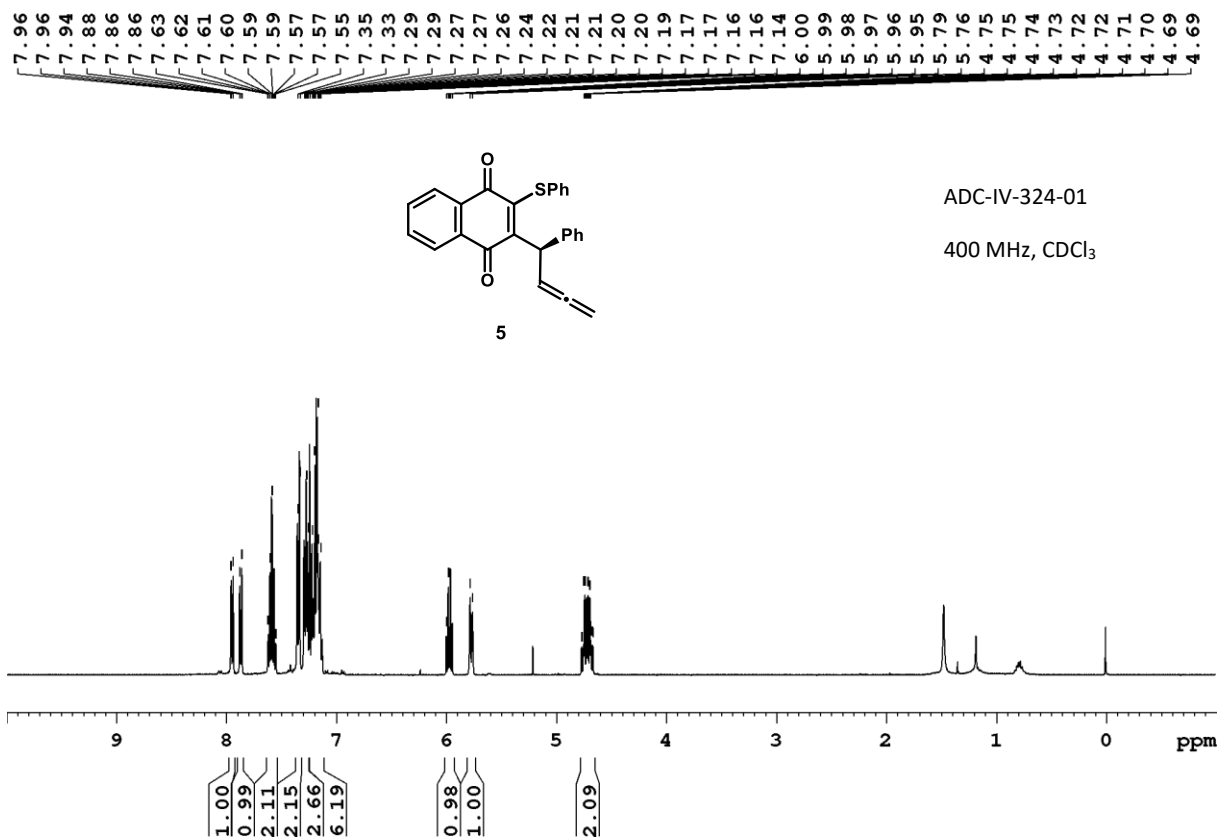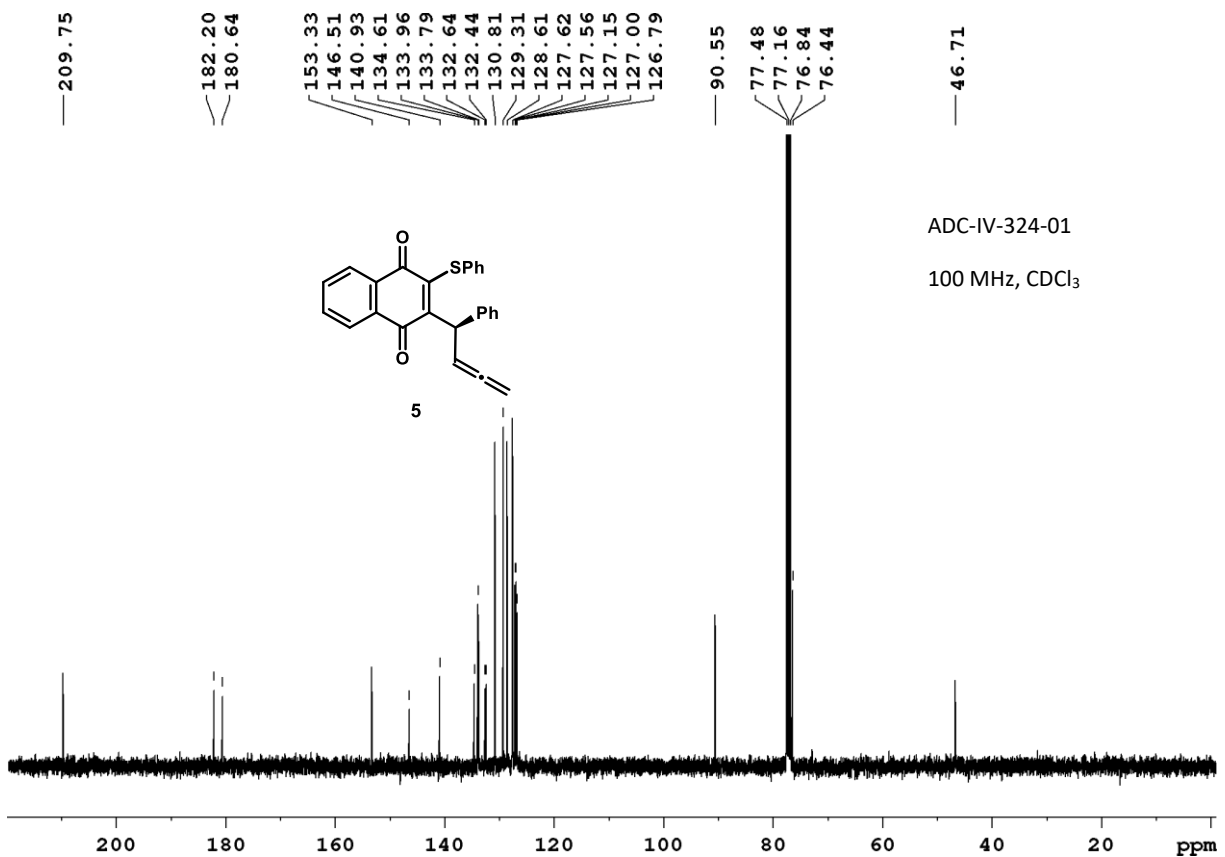

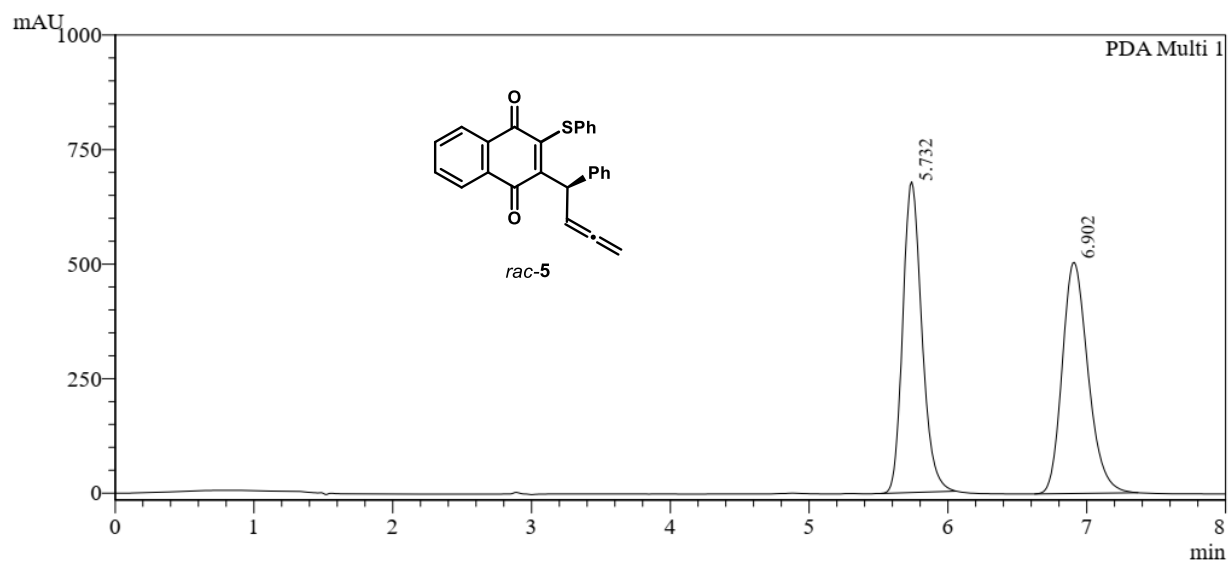

PeakTable

PDA Ch1 251nm 4nm

| Peak# | Ret. Time | Area     | Area %  |
|-------|-----------|----------|---------|
| 1     | 5.732     | 6493055  | 49.836  |
| 2     | 6.902     | 6535886  | 50.164  |
| Total |           | 13028941 | 100.000 |

Phenomenex Cellulose-2 column (90:10 *n*-Hexane/IPA, 1.0 mL/min, 20 °C)

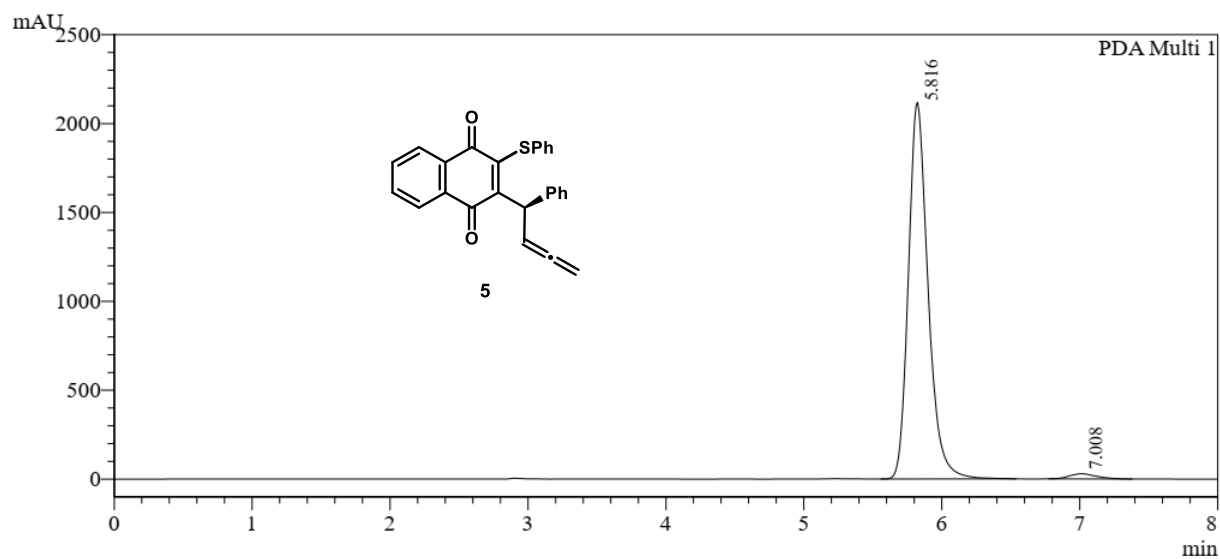

PeakTable

PDA Ch1 251nm 4nm

| Peak# | Ret. Time | Area     | Area %  |
|-------|-----------|----------|---------|
| 1     | 5.816     | 20961938 | 98.153  |
| 2     | 7.008     | 394552   | 1.847   |
| Total |           | 21356489 | 100.000 |

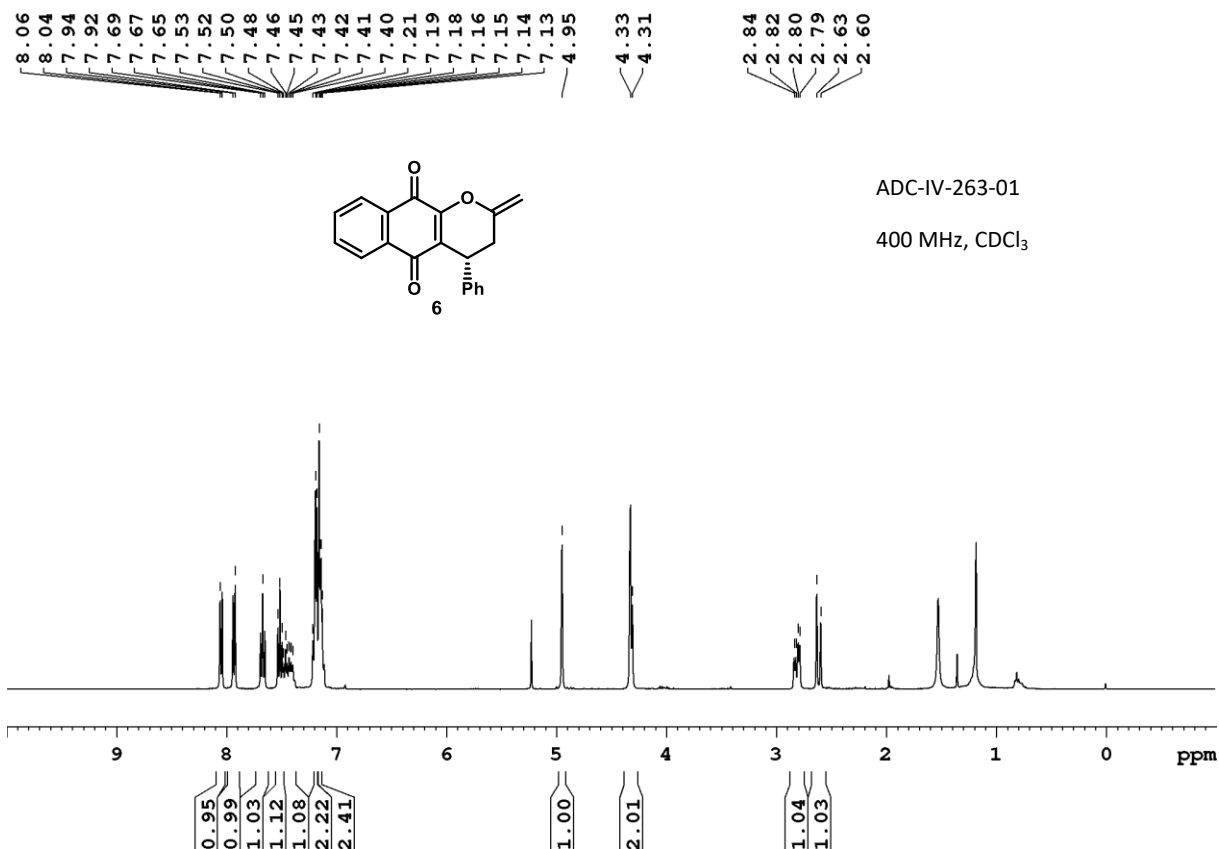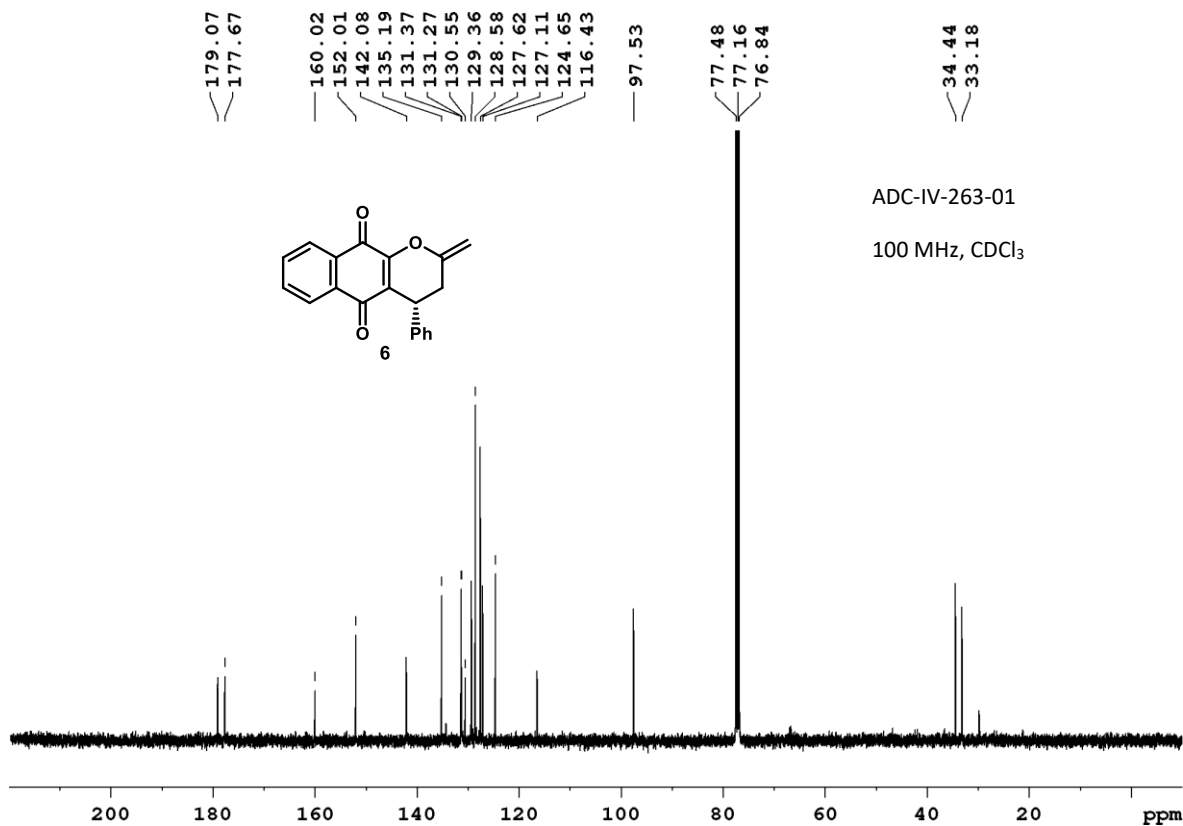

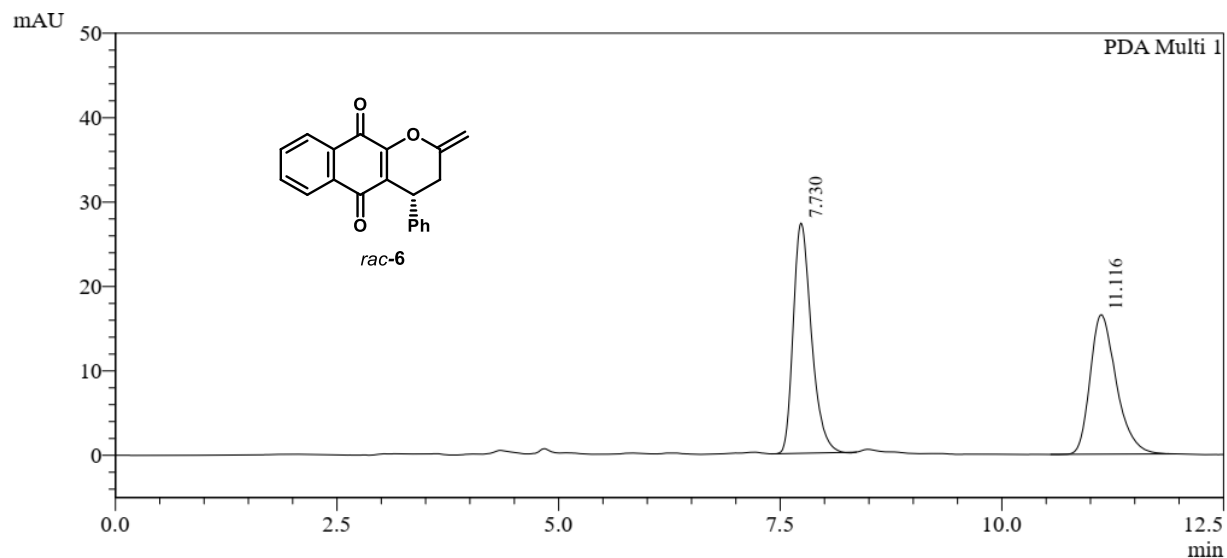

PeakTable

PDA Ch1 317nm 4nm

| Peak# | Ret. Time | Area   | Area %  |
|-------|-----------|--------|---------|
| 1     | 7.730     | 388221 | 53.343  |
| 2     | 11.116    | 339555 | 46.657  |
| Total |           | 727775 | 100.000 |

Daicel Chiralpak AD-H column (80:20 *n*-Hexane/IPA, 1.0 mL/min, 20 °C)

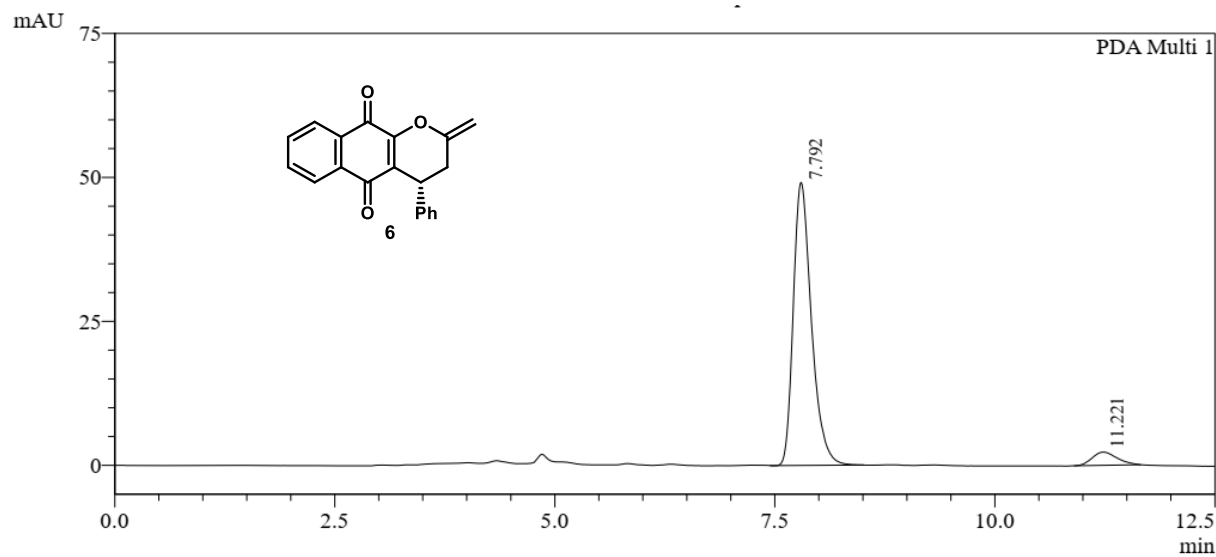

PeakTable

PDA Ch1 317nm 4nm

| Peak# | Ret. Time | Area   | Area %  |
|-------|-----------|--------|---------|
| 1     | 7.792     | 703676 | 93.975  |
| 2     | 11.221    | 45114  | 6.025   |
| Total |           | 748790 | 100.000 |

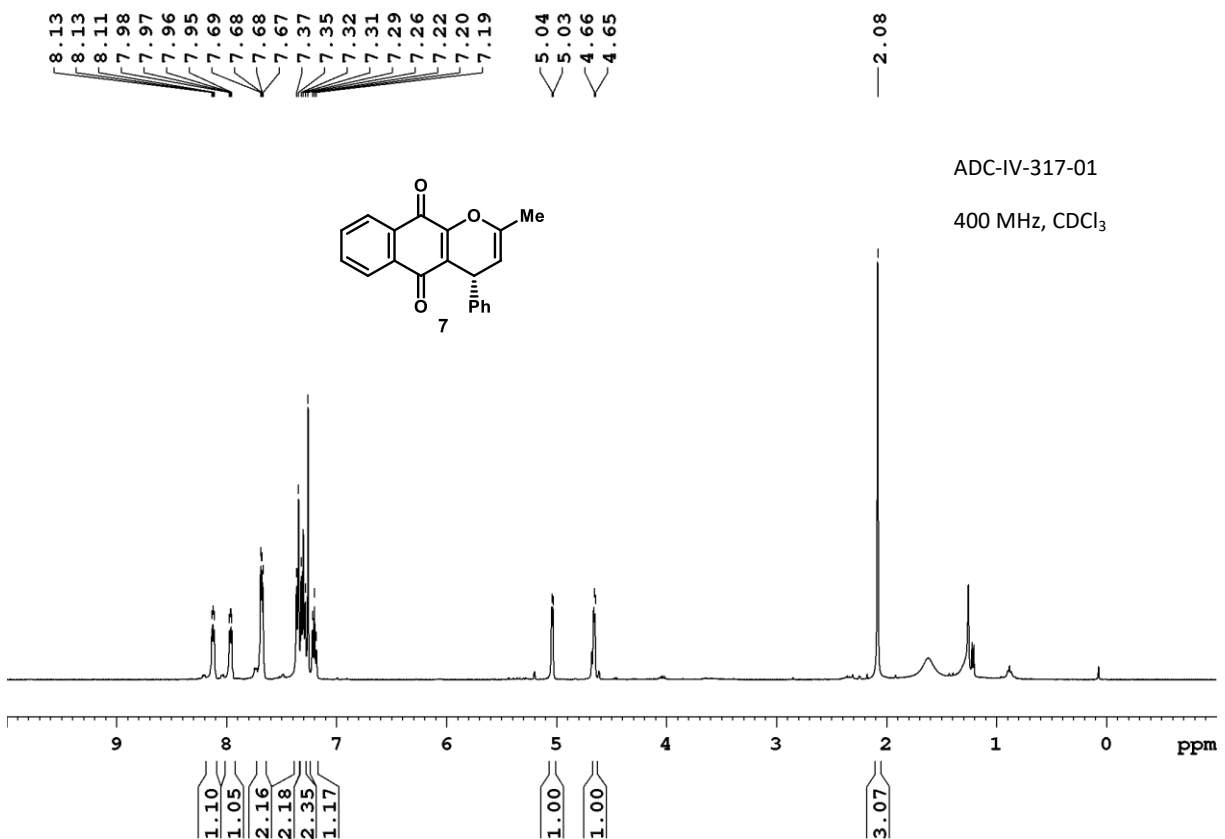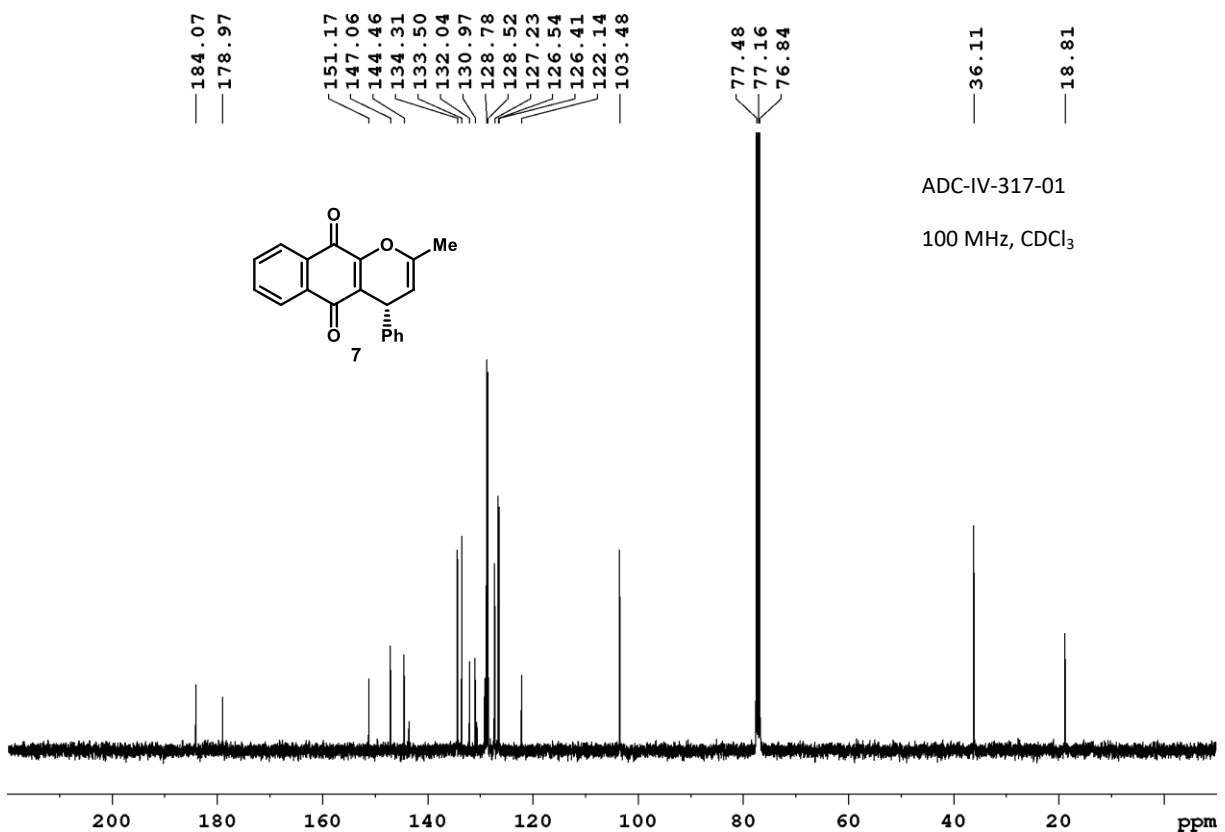

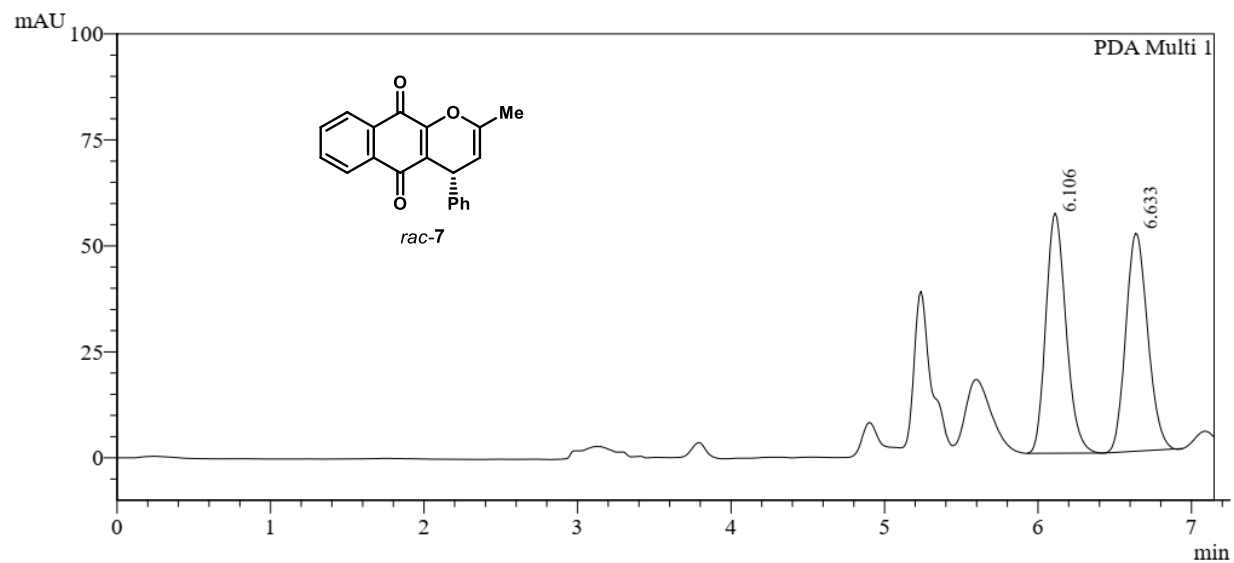

PeakTable

PDA Ch1 234nm 4nm

| Peak# | Ret. Time | Area    | Area %  |
|-------|-----------|---------|---------|
| 1     | 6.106     | 517430  | 50.337  |
| 2     | 6.633     | 510504  | 49.663  |
| Total |           | 1027933 | 100.000 |

Daicel Chiralpak IH column (80:20 *n*-Hexane/IPA, 1.0 mL/min, 20 °C)

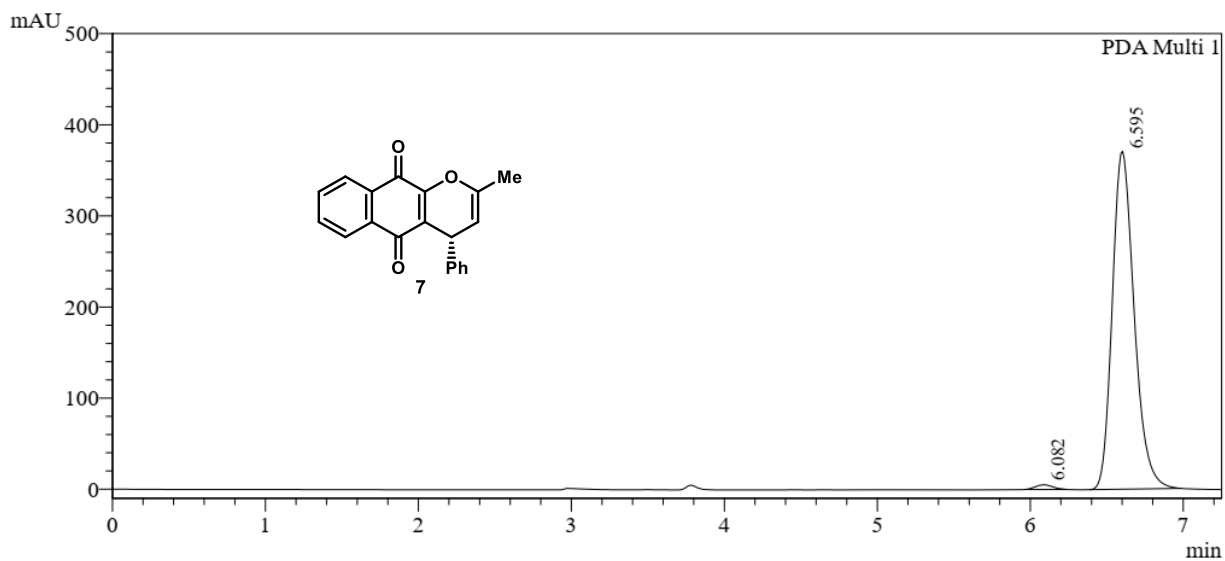

PeakTable

PDA Ch1 234nm 4nm

| Peak# | Ret. Time | Area    | Area %  |
|-------|-----------|---------|---------|
| 1     | 6.082     | 40772   | 1.094   |
| 2     | 6.595     | 3686188 | 98.906  |
| Total |           | 3726959 | 100.000 |

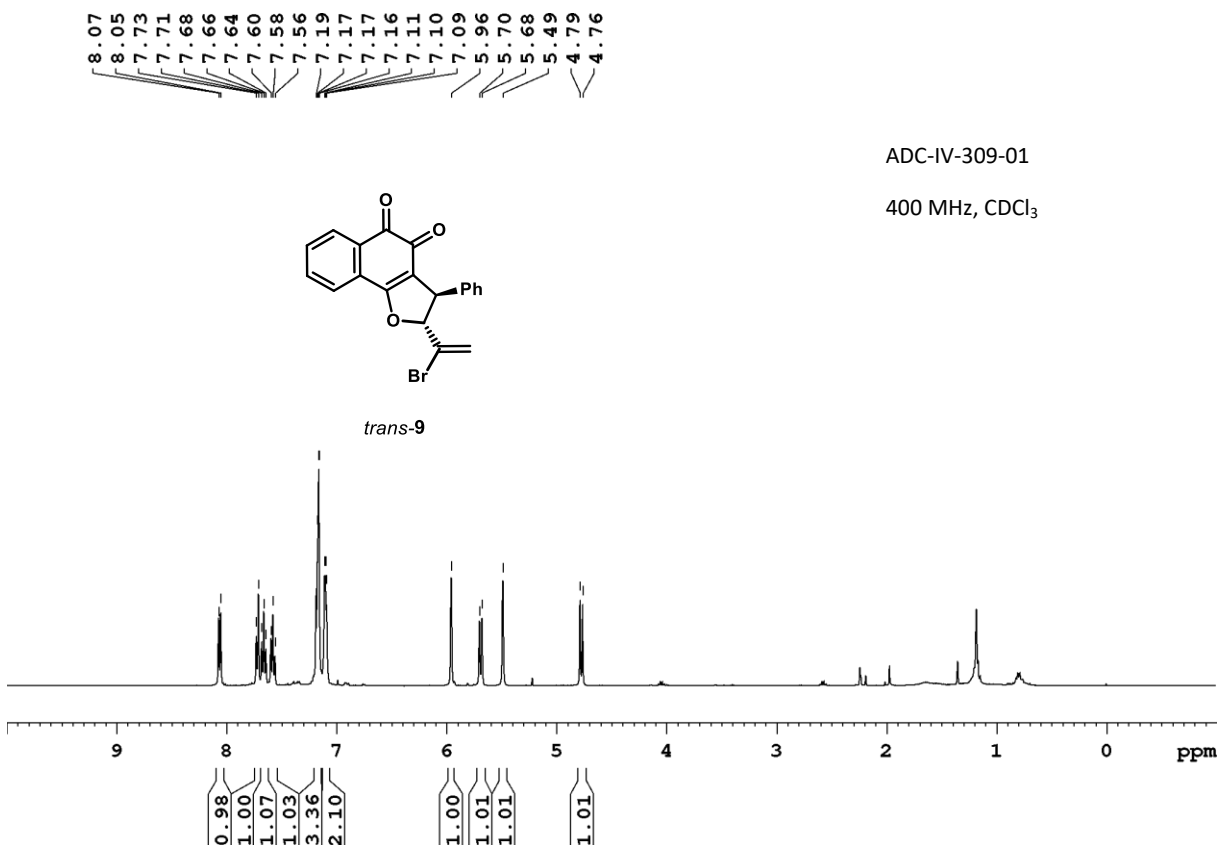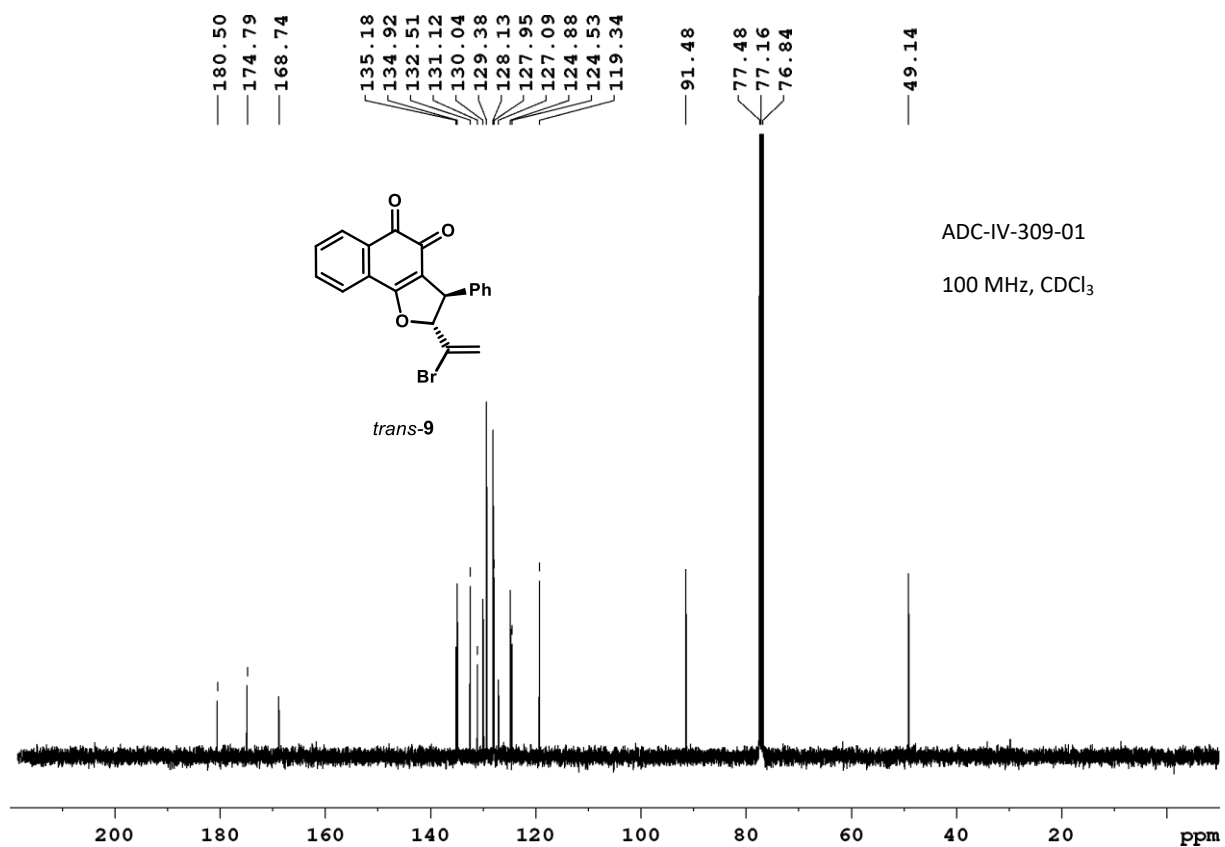

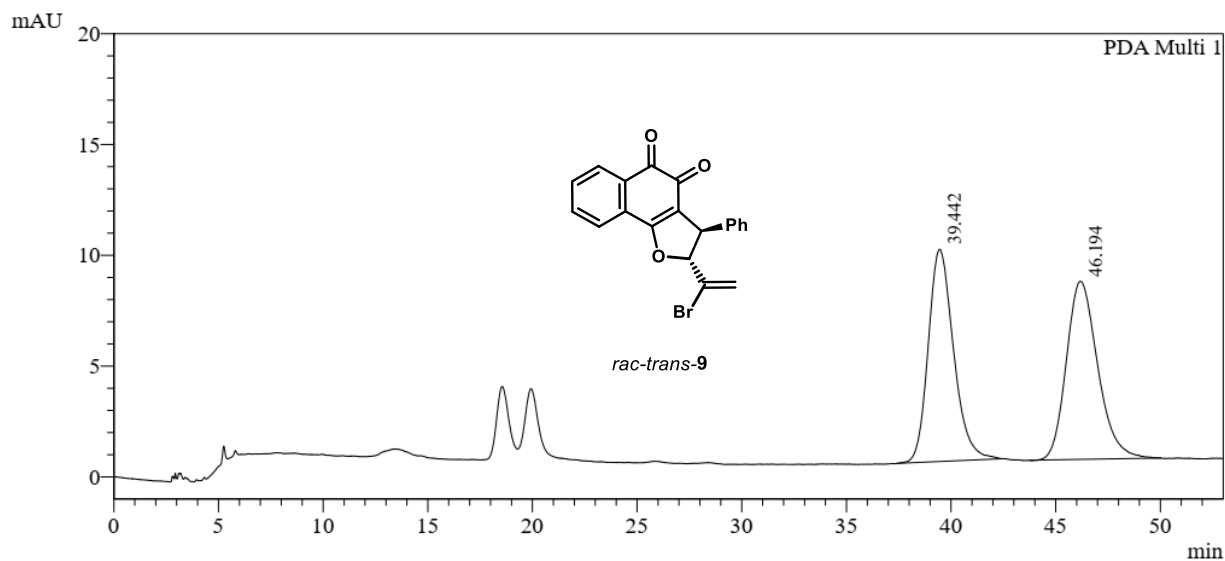

PeakTable

PDA Ch1 274nm 4nm

| Peak# | Ret. Time | Area    | Area %  |
|-------|-----------|---------|---------|
| 1     | 39.442    | 806473  | 49.071  |
| 2     | 46.194    | 837014  | 50.929  |
| Total |           | 1643487 | 100.000 |

Phenomenex Cellulose-2 column (70:30 *n*-Hexane/IPA, 1.0 mL/min, 20 °C)

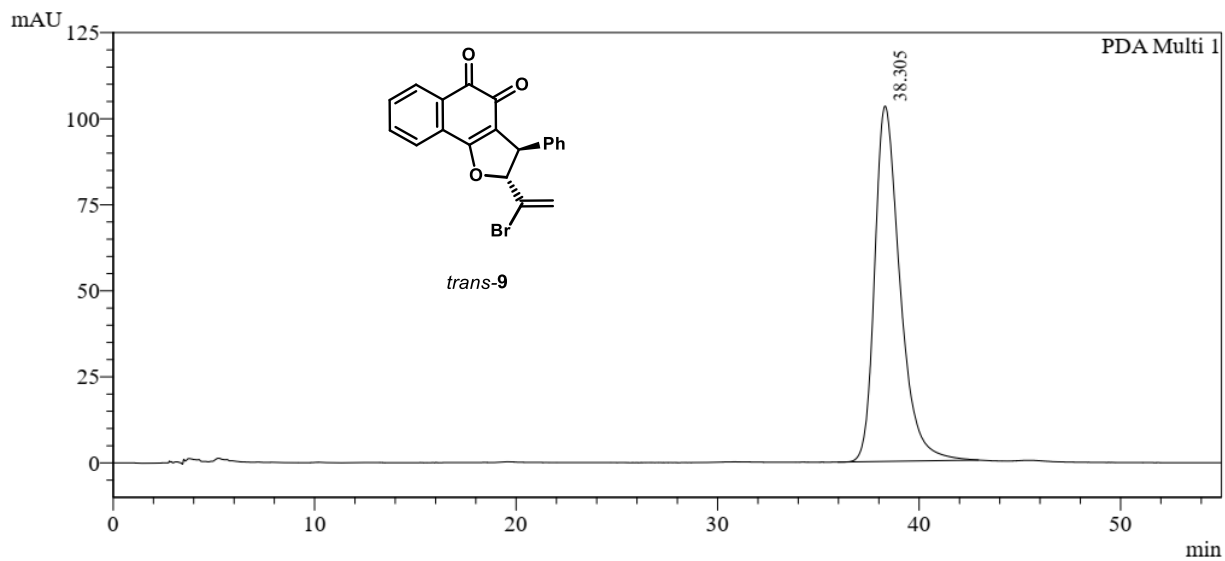

PeakTable

PDA Ch1 274nm 4nm

| Peak# | Ret. Time | Area    | Area %  |
|-------|-----------|---------|---------|
| 1     | 38.305    | 9003151 | 100.000 |
| Total |           | 9003151 | 100.000 |

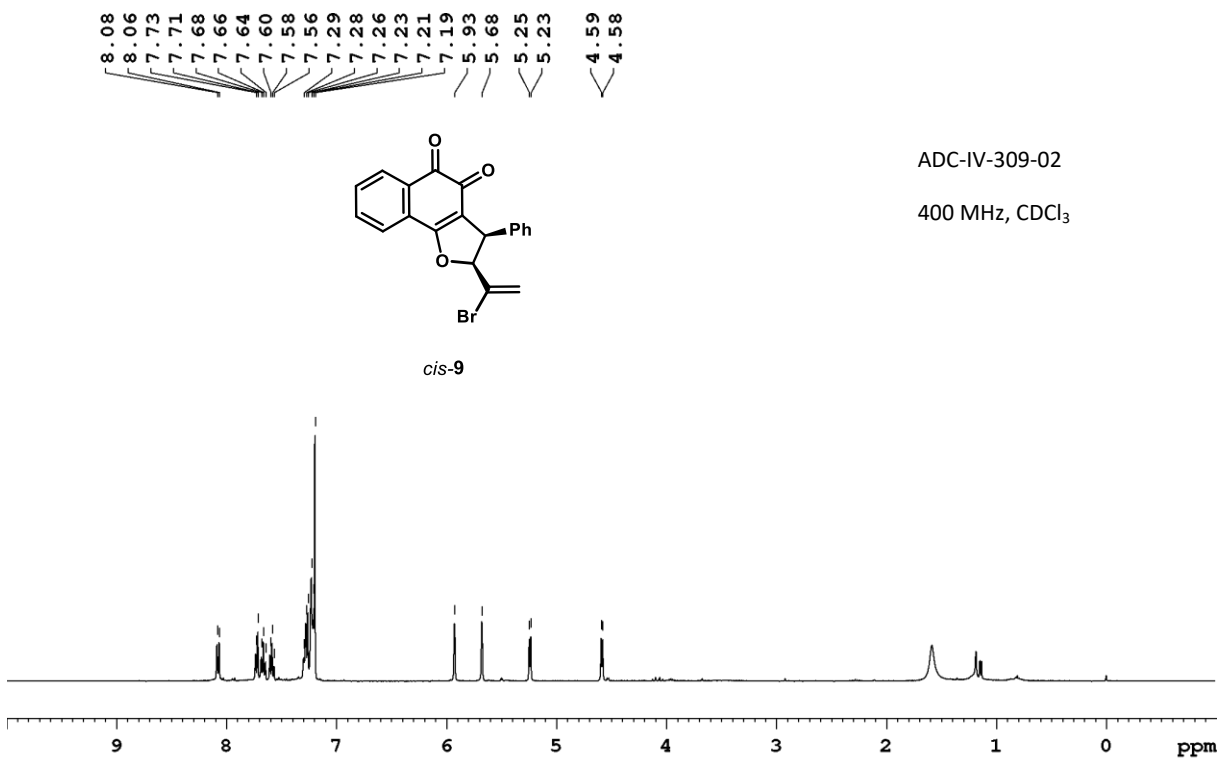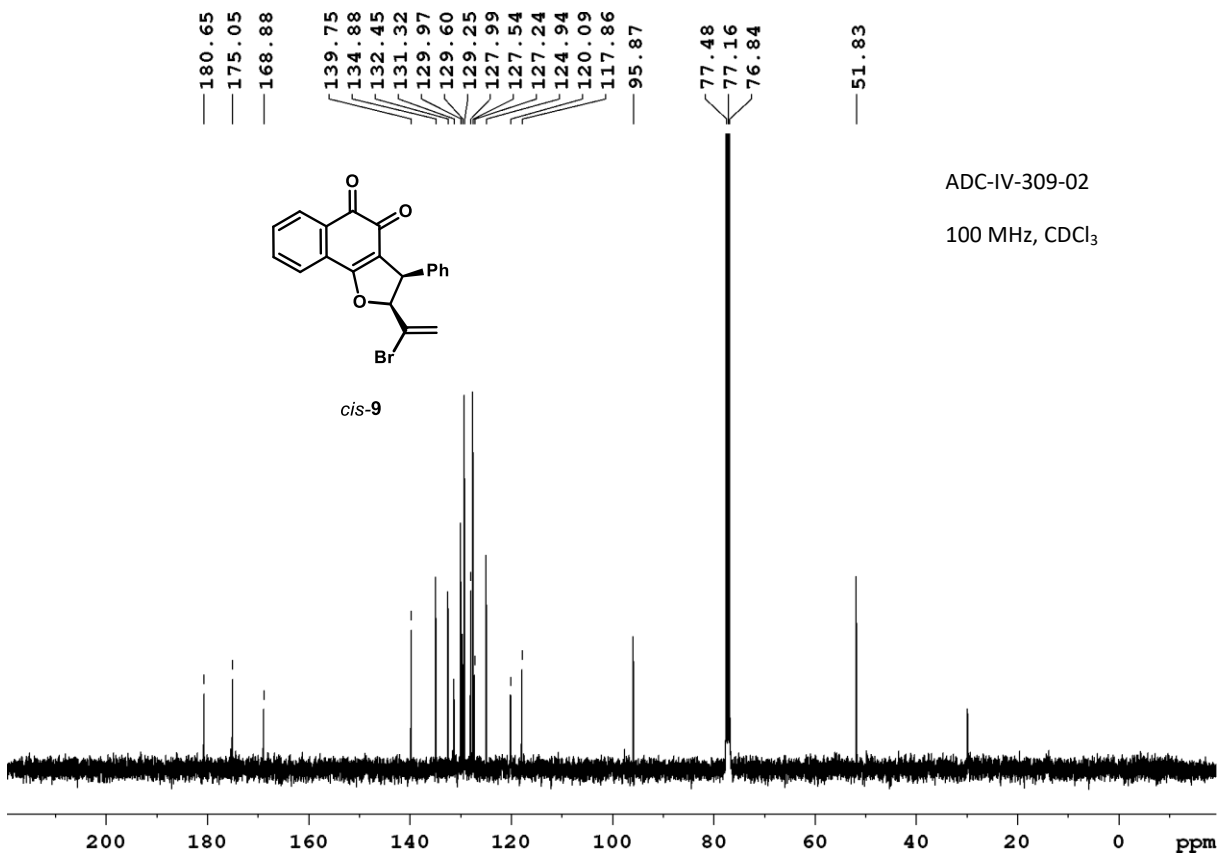

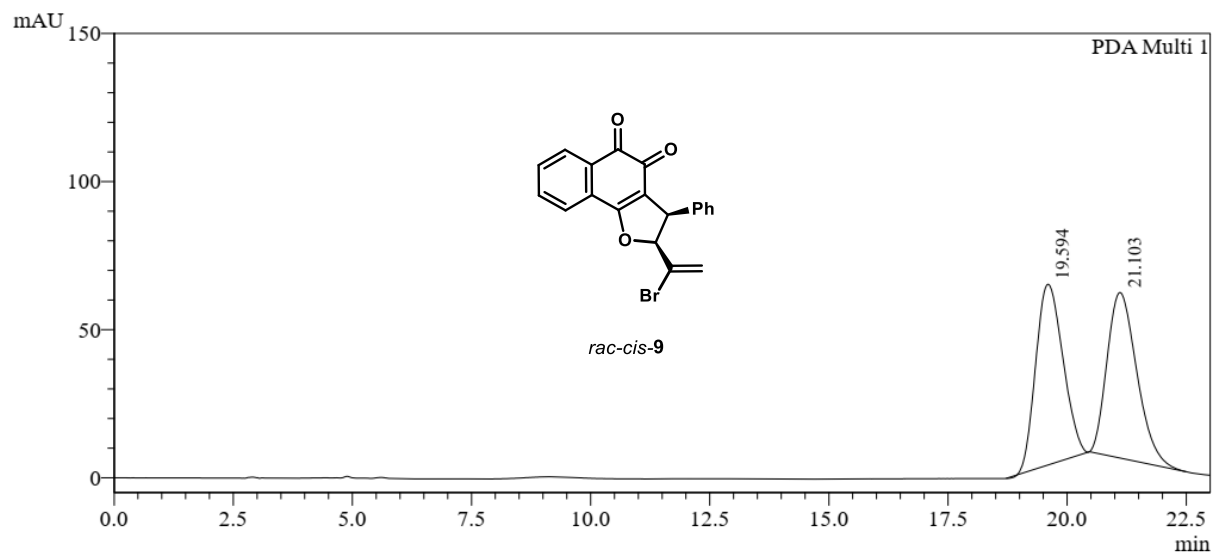

PeakTable

PDA Ch1 264nm 4nm

| Peak# | Ret. Time | Area    | Area %  |
|-------|-----------|---------|---------|
| 1     | 19.594    | 2420707 | 49.895  |
| 2     | 21.103    | 2430887 | 50.105  |
| Total |           | 4851594 | 100.000 |

Phenomenex Cellulose-2 column (70:30 *n*-Hexane/IPA, 1.0 mL/min, 20 °C)

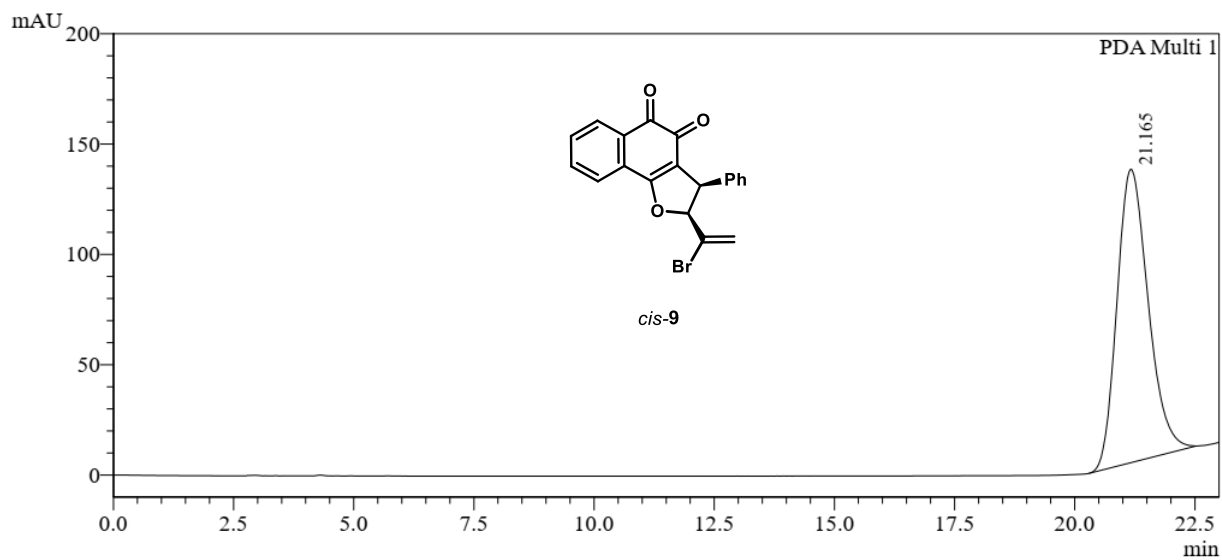

PeakTable

PDA Ch1 264nm 4nm

| Peak# | Ret. Time | Area    | Area %  |
|-------|-----------|---------|---------|
| 1     | 21.165    | 6009441 | 100.000 |
| Total |           | 6009441 | 100.000 |

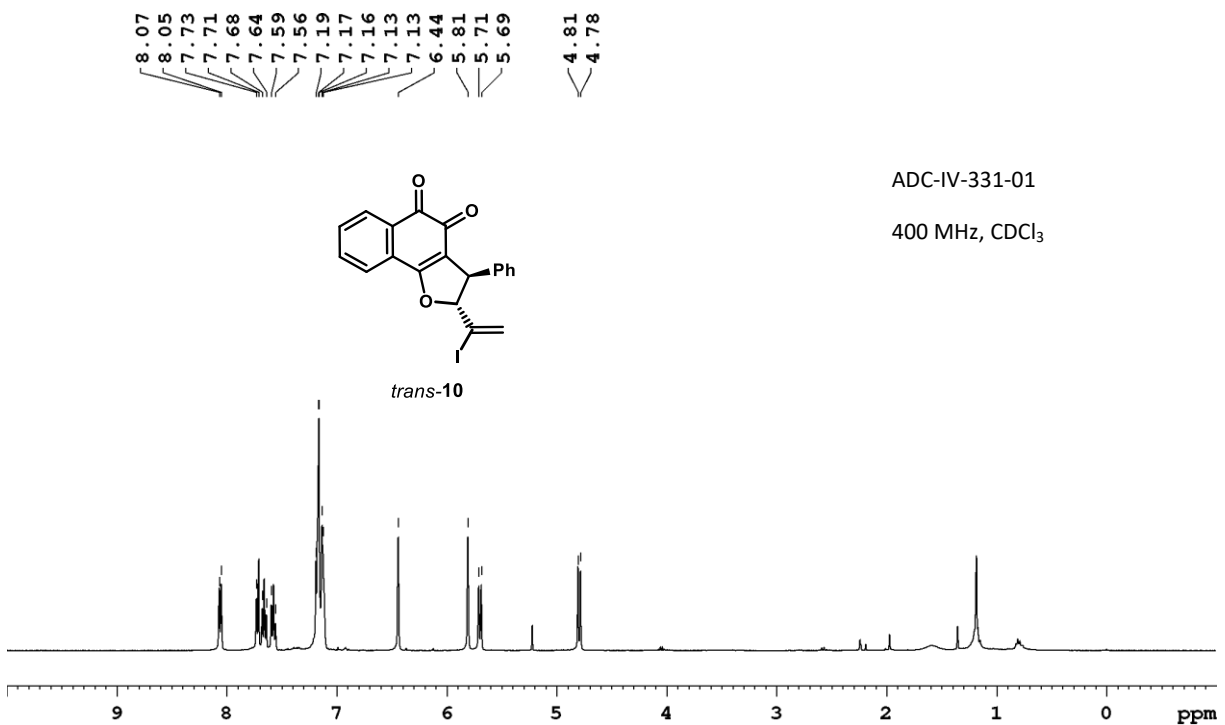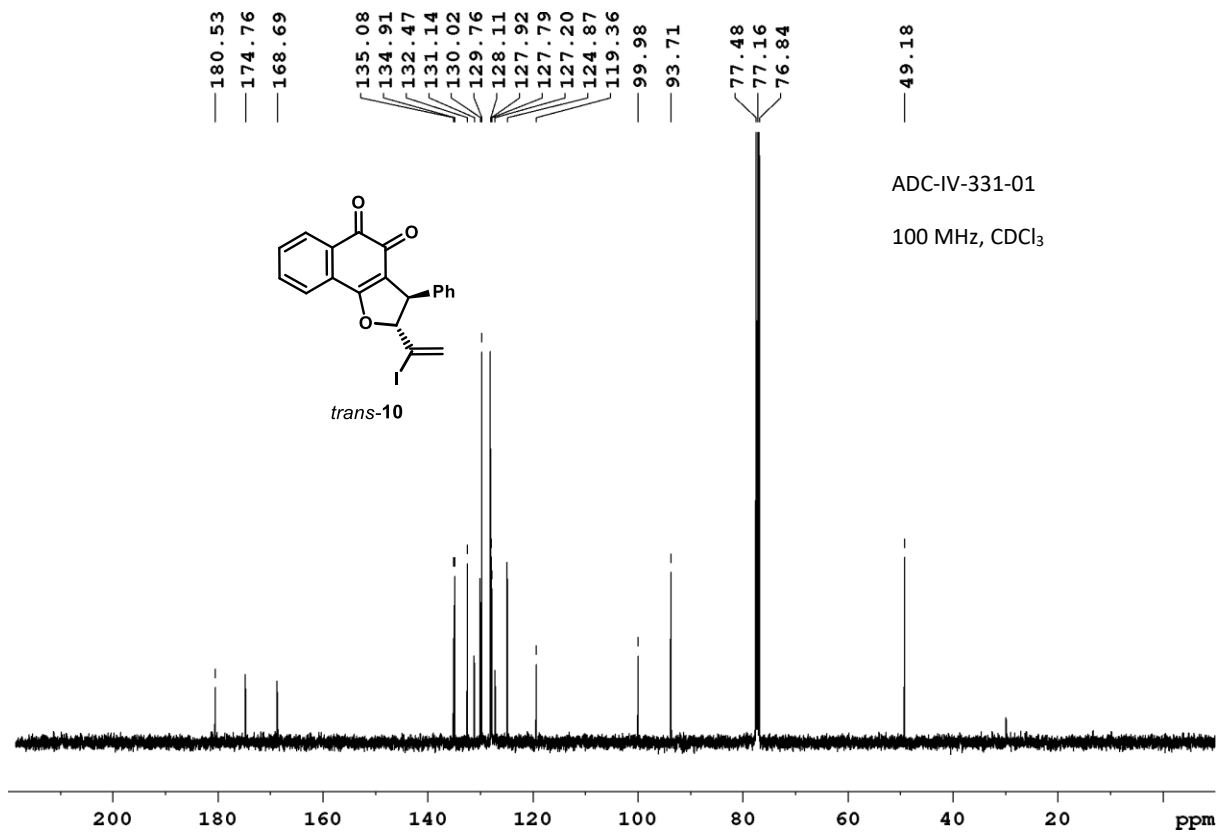

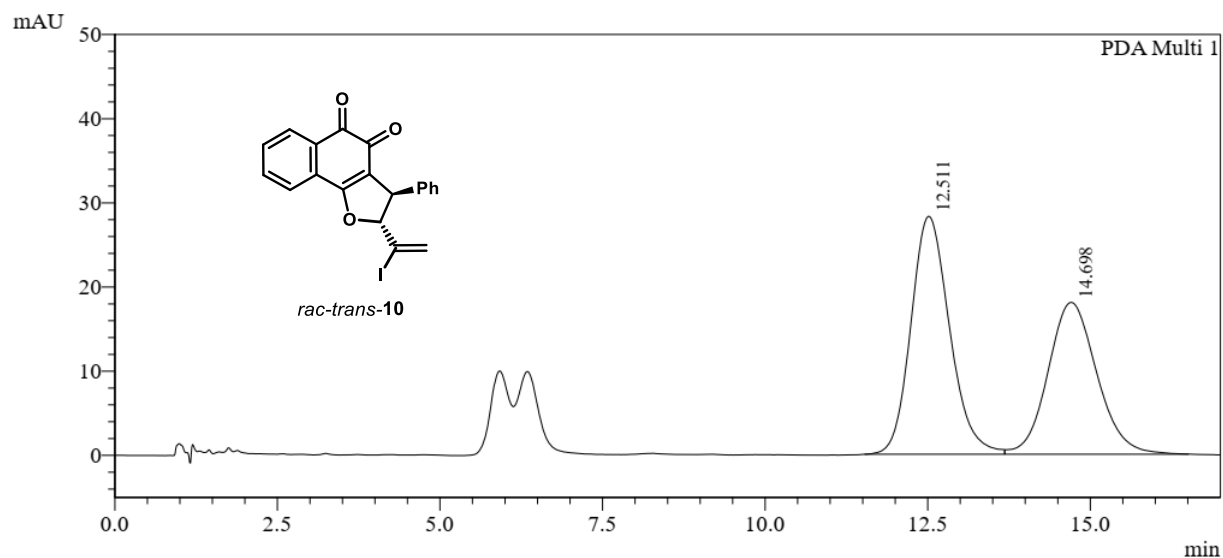

PeakTable

PDA Ch1 257nm 4nm

| Peak# | Ret. Time | Area    | Area %  |
|-------|-----------|---------|---------|
| 1     | 12.511    | 1168667 | 55.371  |
| 2     | 14.698    | 941954  | 44.629  |
| Total |           | 2110621 | 100.000 |

Phenomenex Cellulose-2 column (70:25:5 *n*-Hexane/IPA/EtOH, 3.0 mL/min, 20 °C)

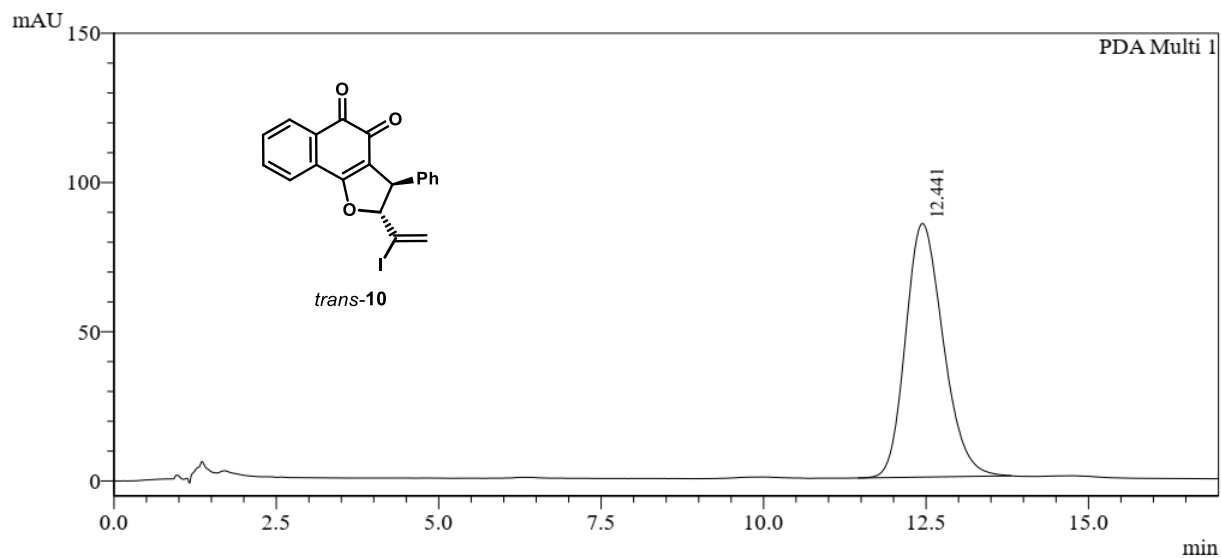

PeakTable

PDA Ch1 257nm 4nm

| Peak# | Ret. Time | Area    | Area %  |
|-------|-----------|---------|---------|
| 1     | 12.441    | 3426655 | 100.000 |
| Total |           | 3426655 | 100.000 |

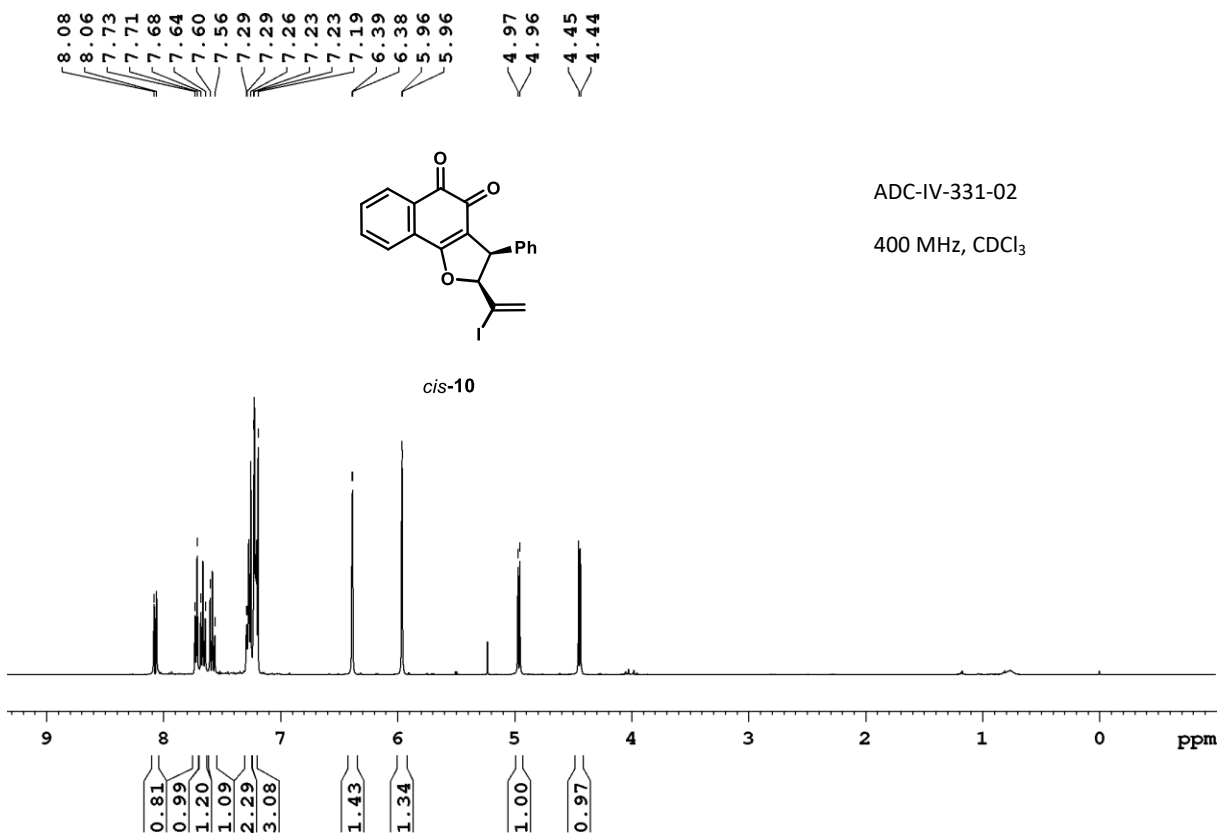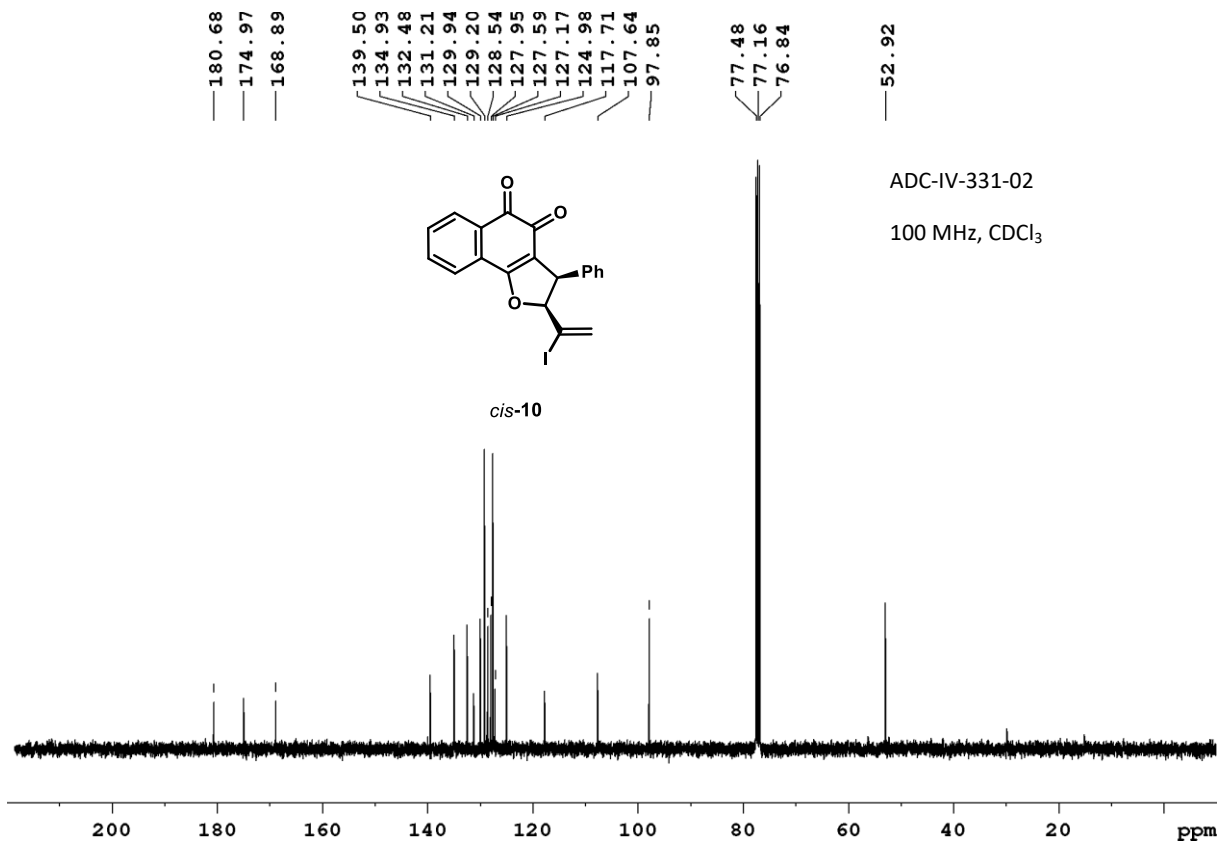

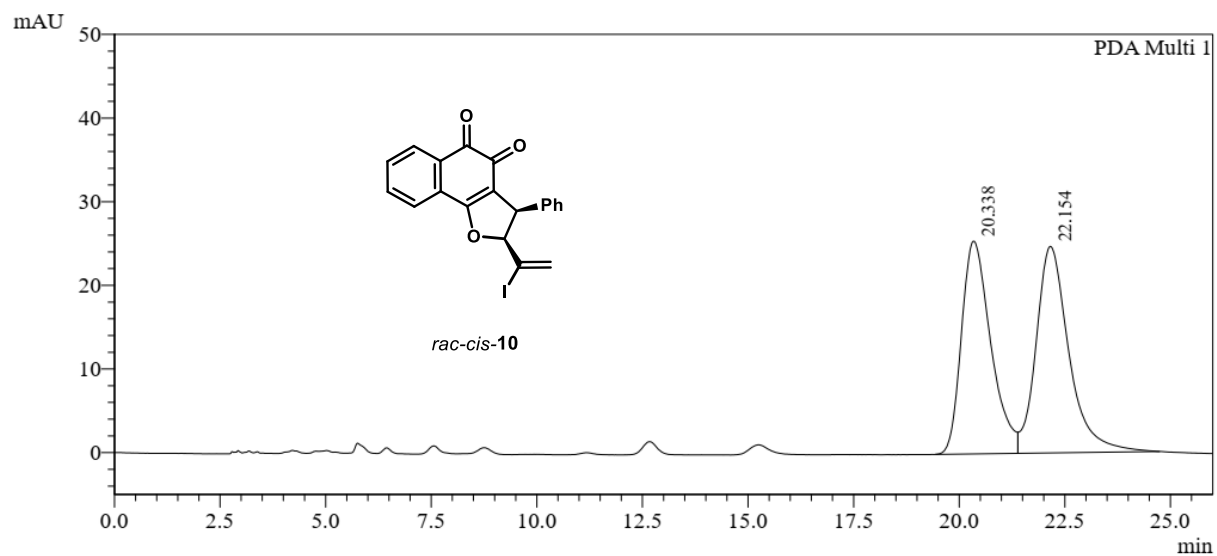

PeakTable

PDA Ch1 280nm 4nm

| Peak# | Ret. Time | Area    | Area %  |
|-------|-----------|---------|---------|
| 1     | 20.338    | 1227489 | 47.910  |
| 2     | 22.154    | 1334569 | 52.090  |
| Total |           | 2562058 | 100.000 |

Phenomenex Cellulose-2 column (70:30 *n*-Hexane/IPA, 1.0 mL/min, 20 °C)

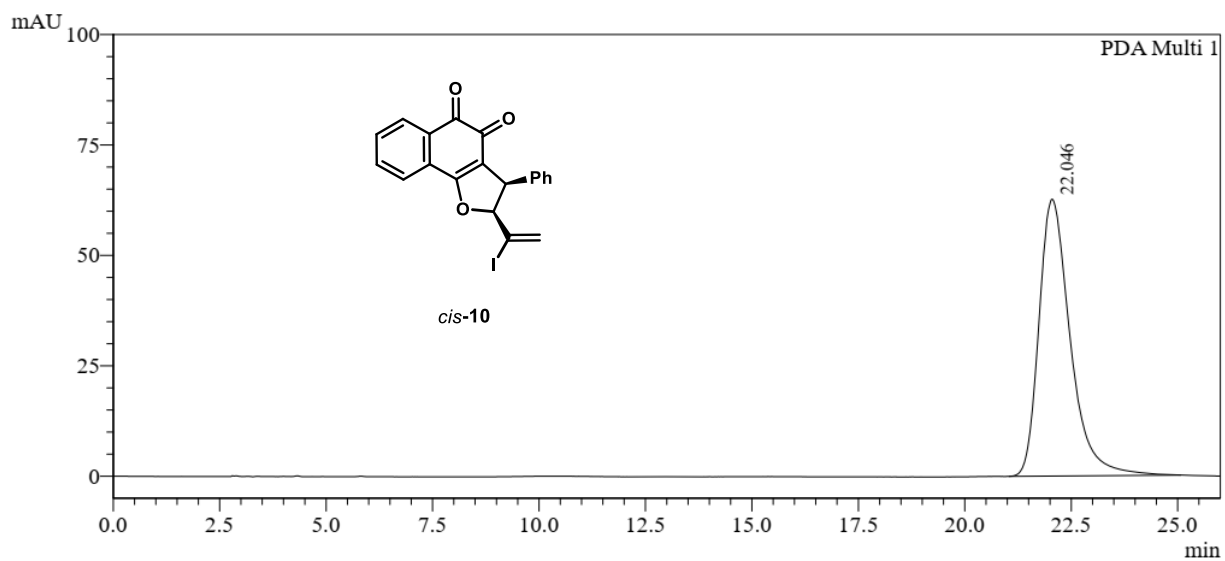

PeakTable

PDA Ch1 280nm 4nm

| Peak# | Ret. Time | Area    | Area %  |
|-------|-----------|---------|---------|
| 1     | 22.046    | 3208381 | 100.000 |
| Total |           | 3208381 | 100.000 |

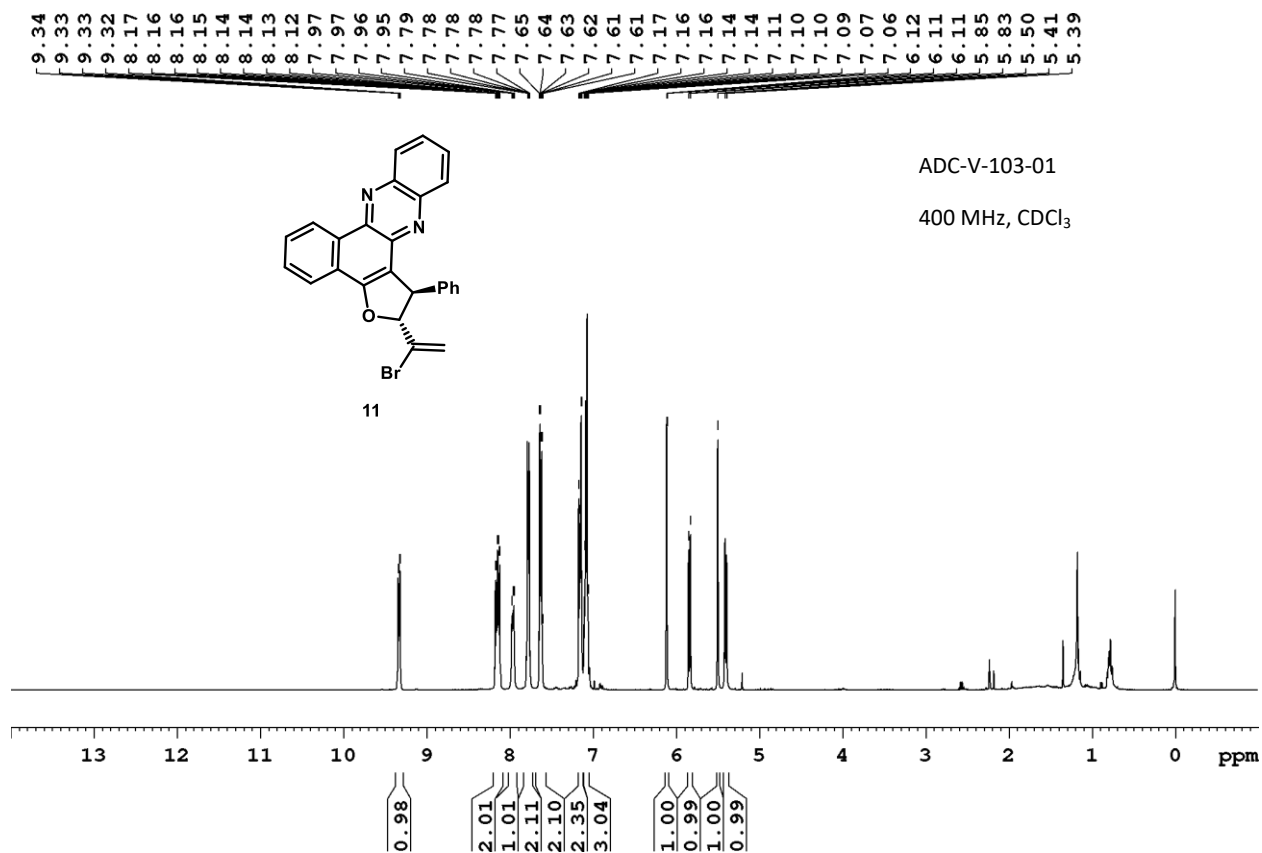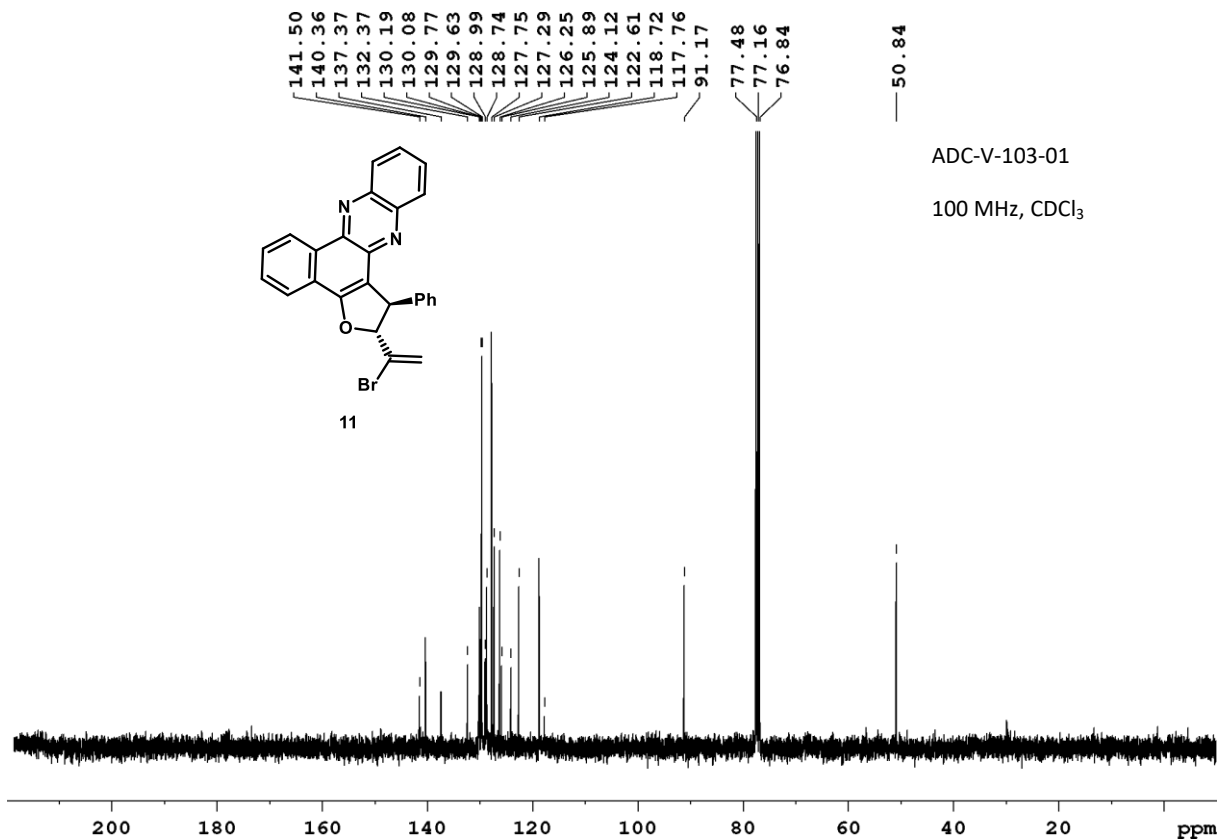

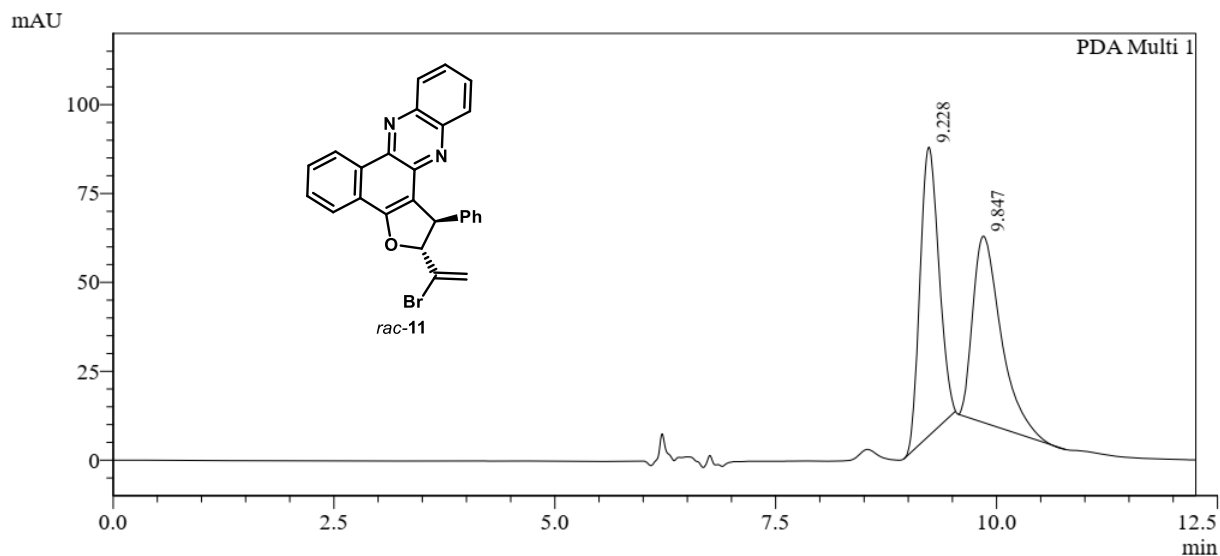

PeakTable

PDA Ch1 280nm 4nm

| Peak# | Ret. Time | Area    | Area %  |
|-------|-----------|---------|---------|
| 1     | 9.228     | 1208287 | 50.857  |
| 2     | 9.847     | 1167575 | 49.143  |
| Total |           | 2375862 | 100.000 |

Phenomenex Amylose-2 column (95:5 *n*-Hexane/IPA, 0.5 mL/min, 20 °C)

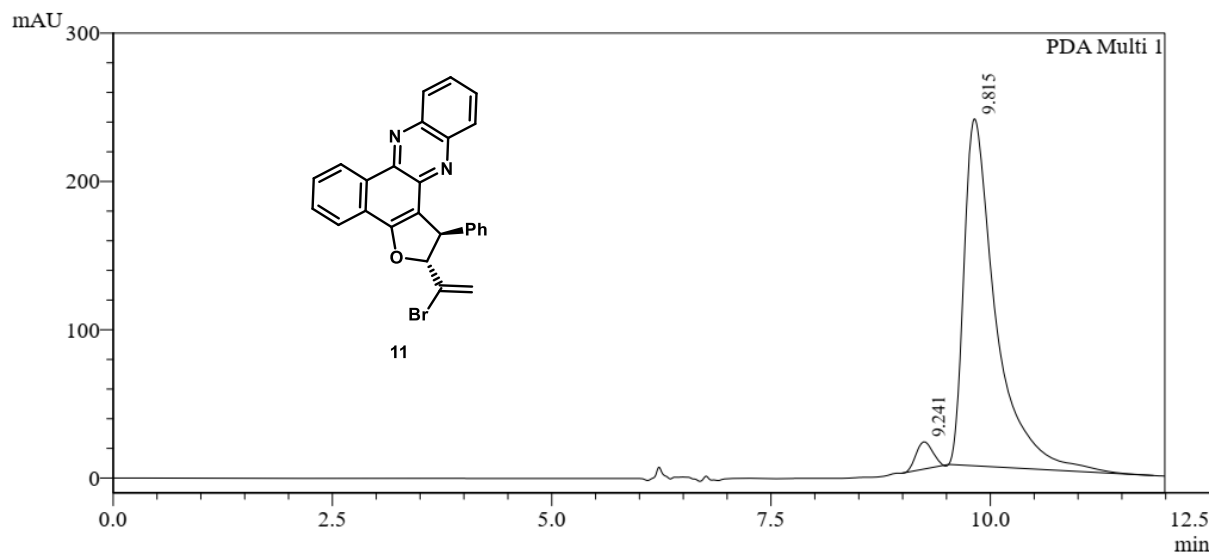

PeakTable

PDA Ch1 280nm 4nm

| Peak# | Ret. Time | Area    | Area %  |
|-------|-----------|---------|---------|
| 1     | 9.241     | 241506  | 3.930   |
| 2     | 9.815     | 5903989 | 96.070  |
| Total |           | 6145494 | 100.000 |

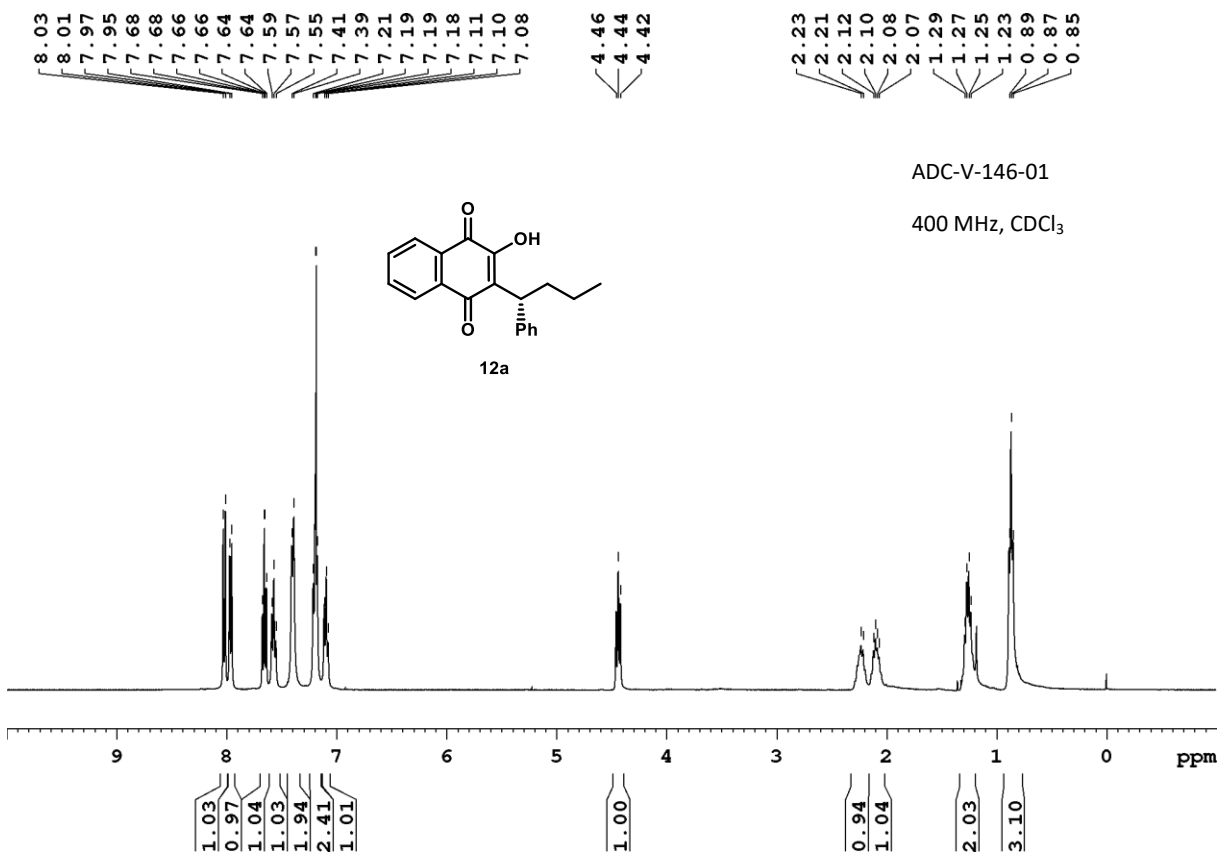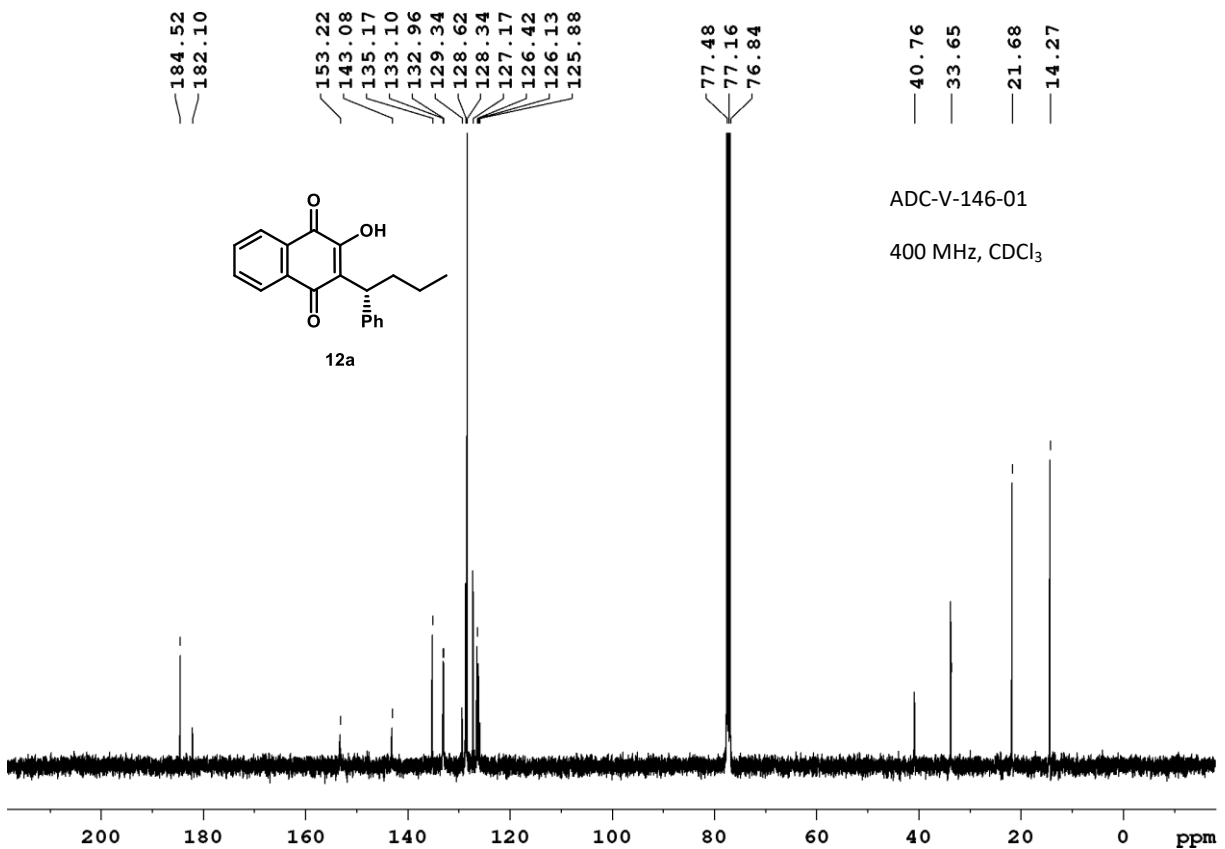

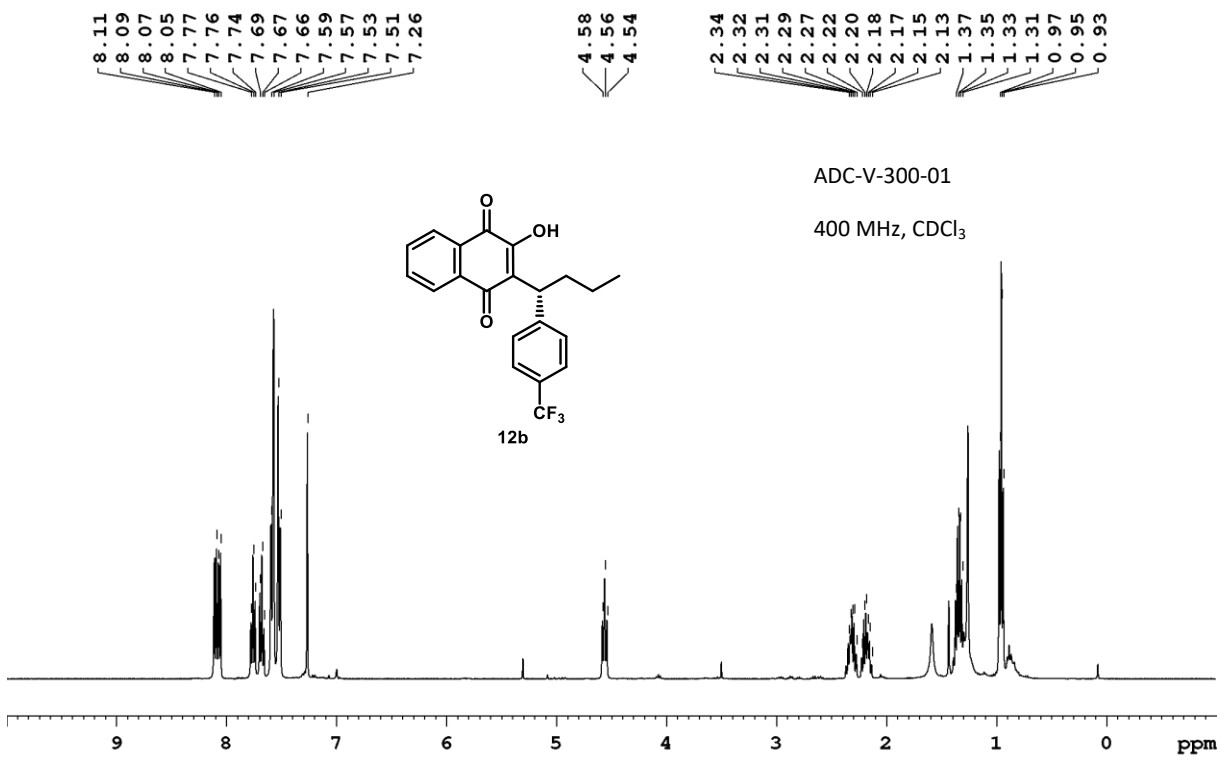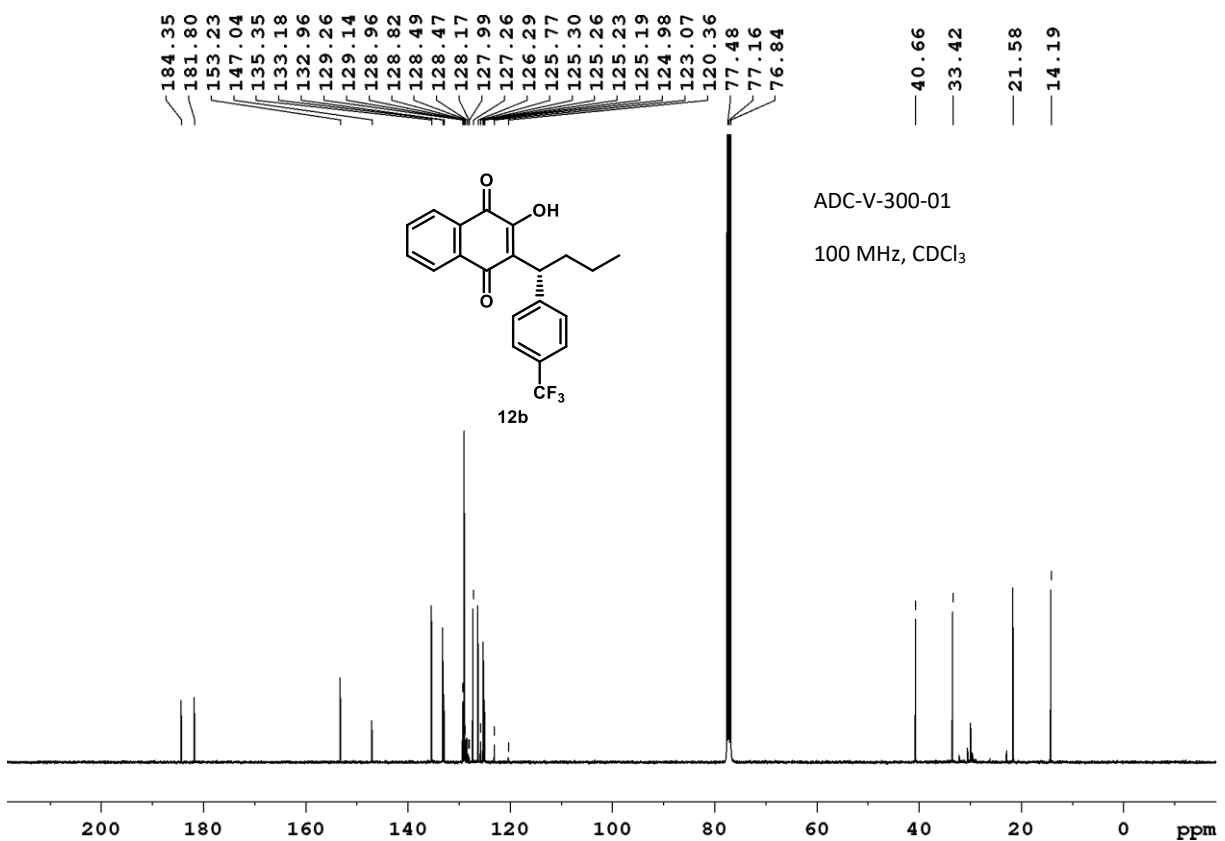

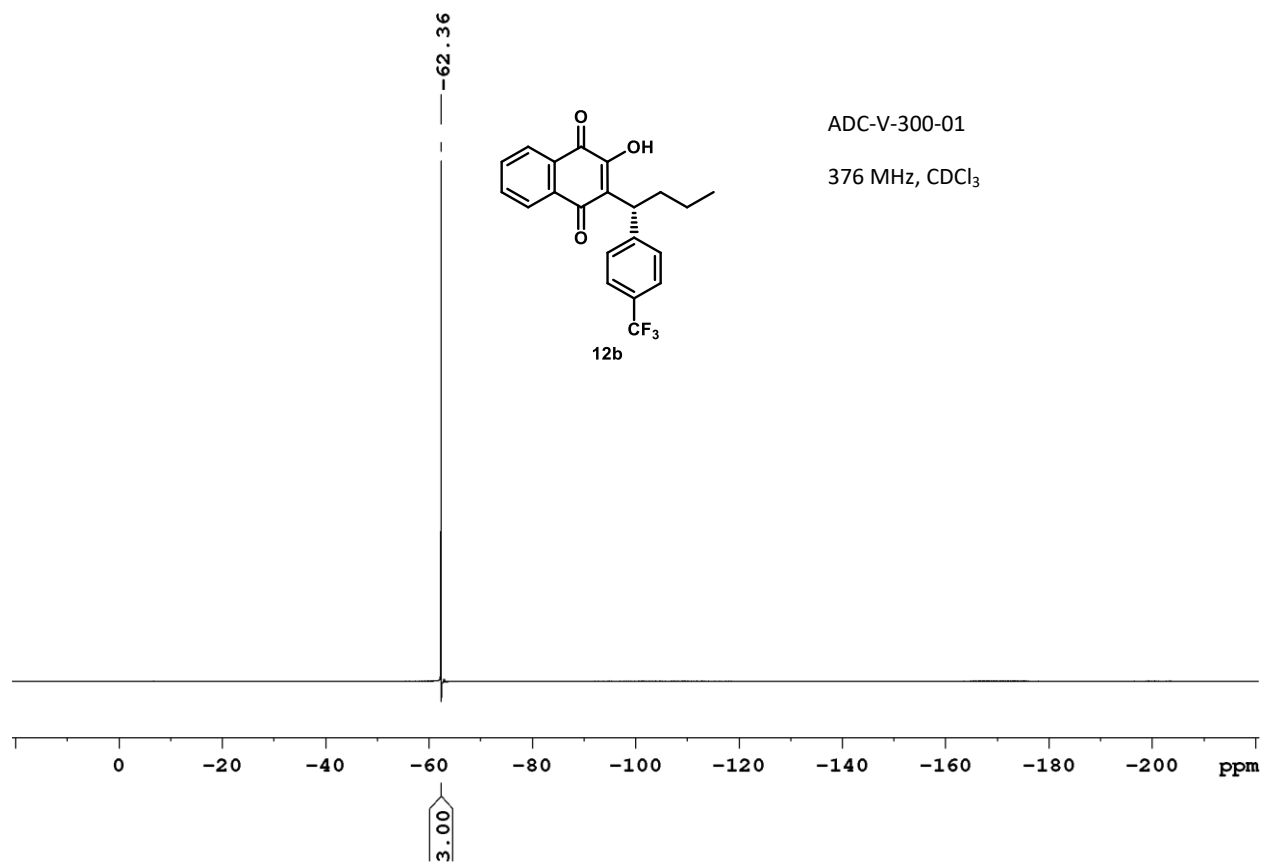

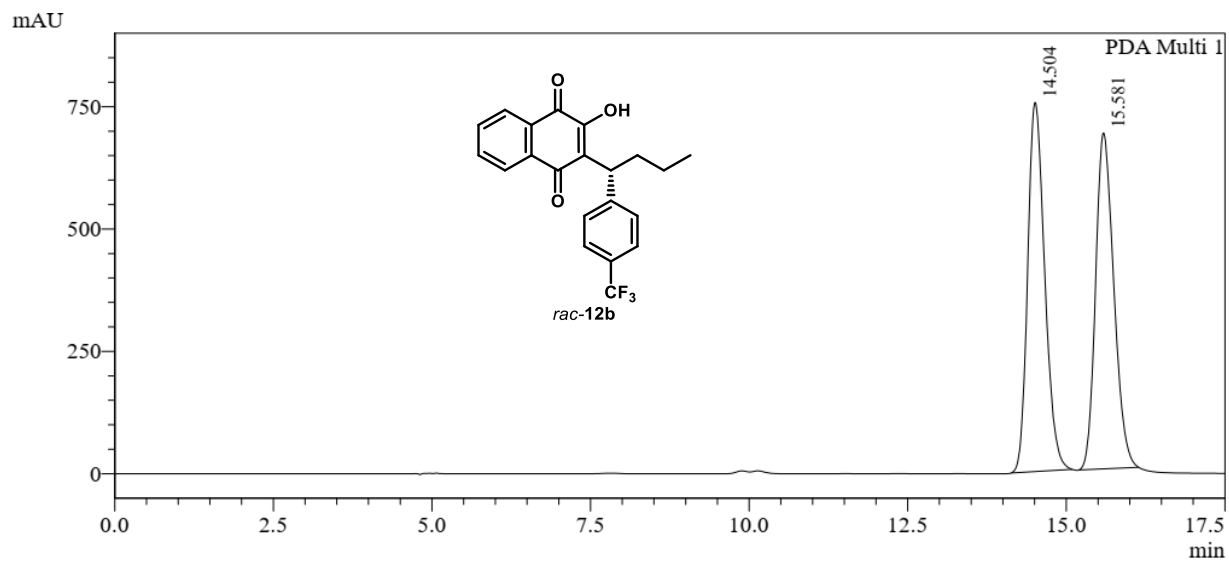

PeakTable

PDA Ch1 280nm 4nm

| Peak# | Ret. Time | Area     | Area %  |
|-------|-----------|----------|---------|
| 1     | 14.504    | 14054502 | 50.657  |
| 2     | 15.581    | 13690027 | 49.343  |
| Total |           | 27744529 | 100.000 |

Daicel Chiralpak AD-H column (95:5 *n*-Hexane/IPA, 0.5 mL/min, 20 °C)

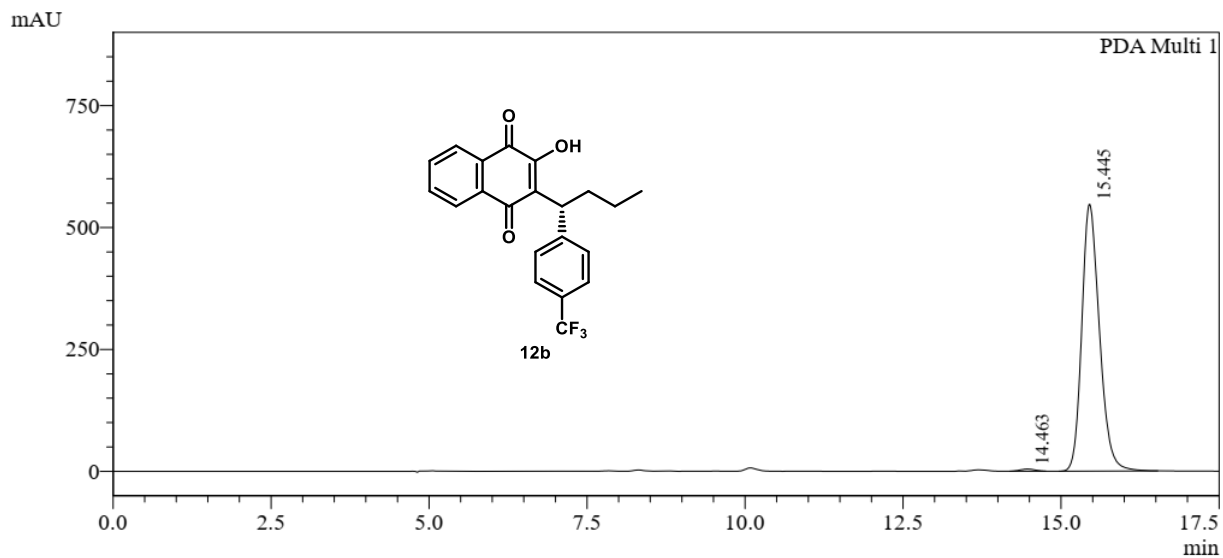

PeakTable

PDA Ch1 280nm 4nm

| Peak# | Ret. Time | Area     | Area %  |
|-------|-----------|----------|---------|
| 1     | 14.463    | 70737    | 0.659   |
| 2     | 15.445    | 10656562 | 99.341  |
| Total |           | 10727299 | 100.000 |

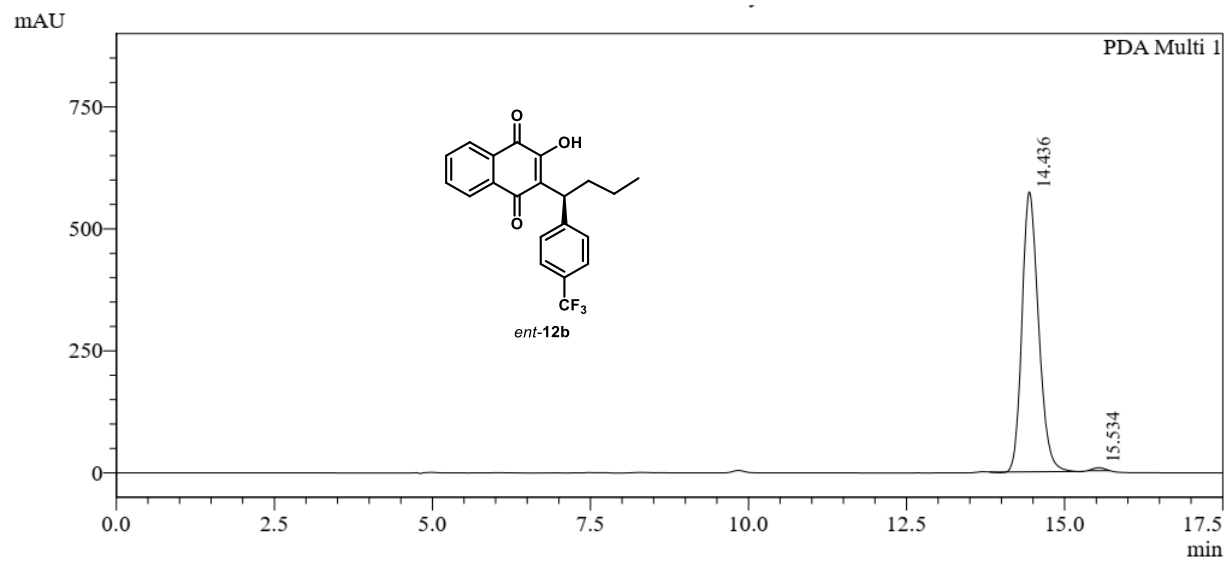

PeakTable

PDA Ch1 280nm 4nm

| Peak# | Ret. Time | Area     | Area %  |
|-------|-----------|----------|---------|
| 1     | 14.436    | 10430144 | 99.282  |
| 2     | 15.534    | 75458    | 0.718   |
| Total |           | 10505602 | 100.000 |

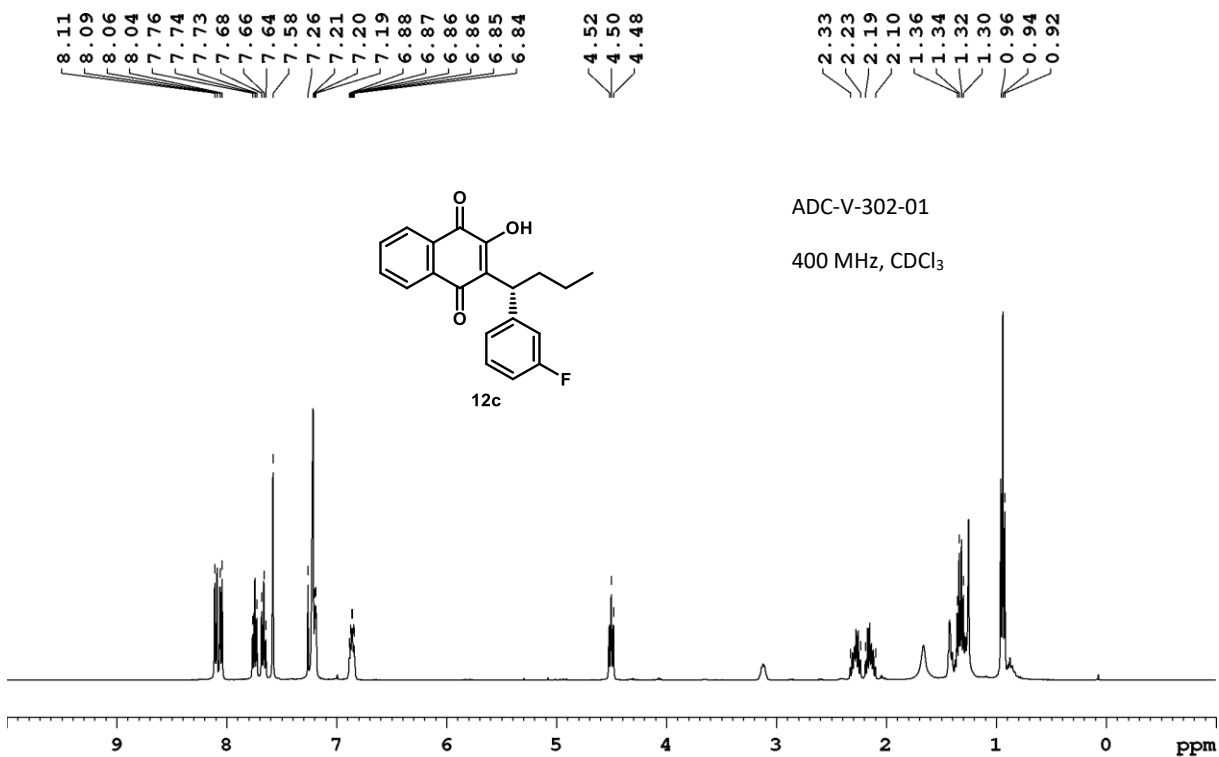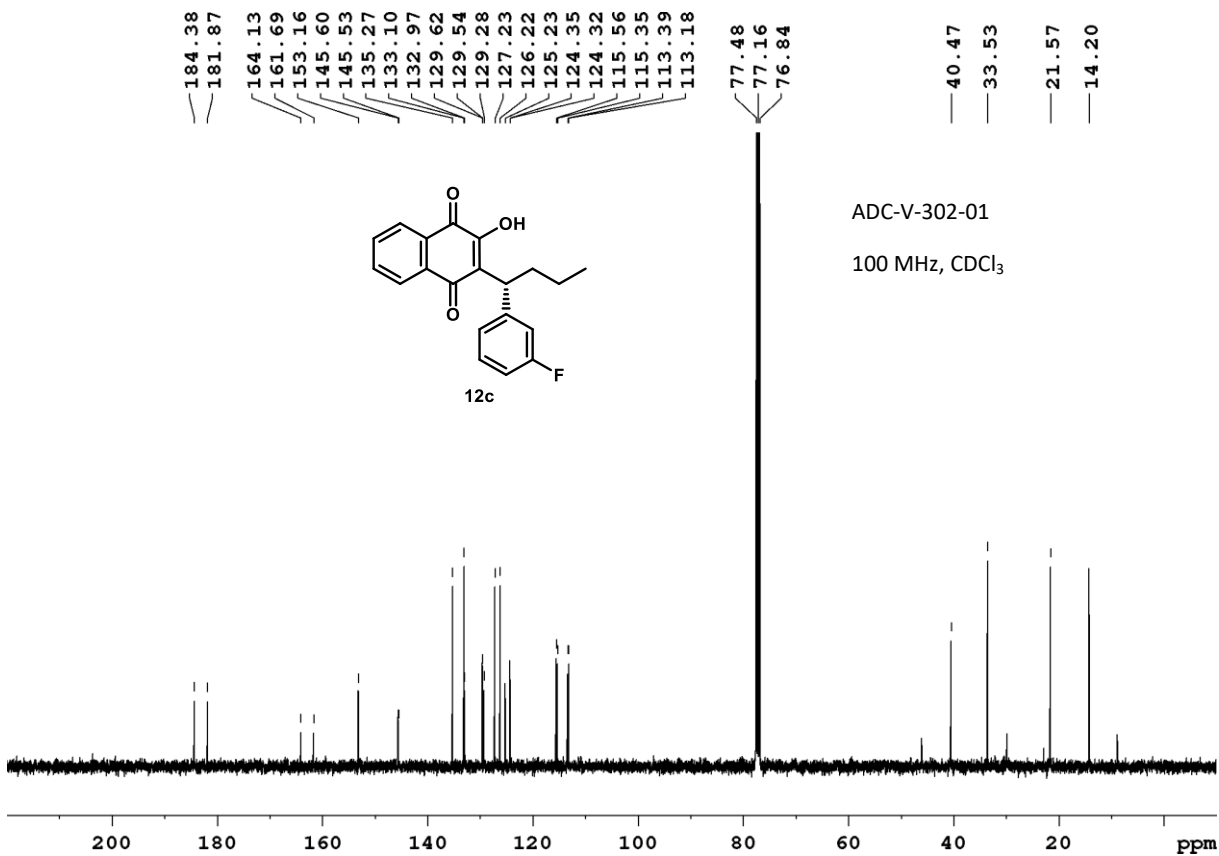

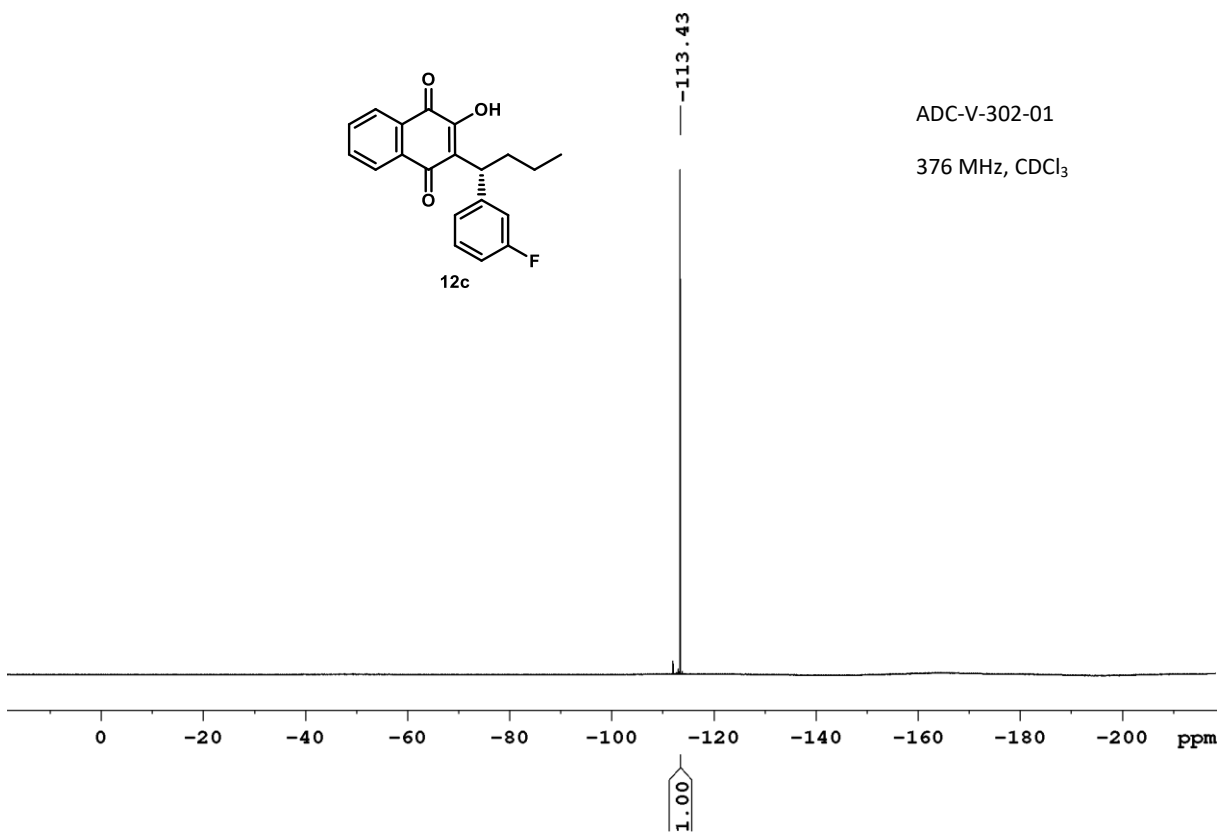

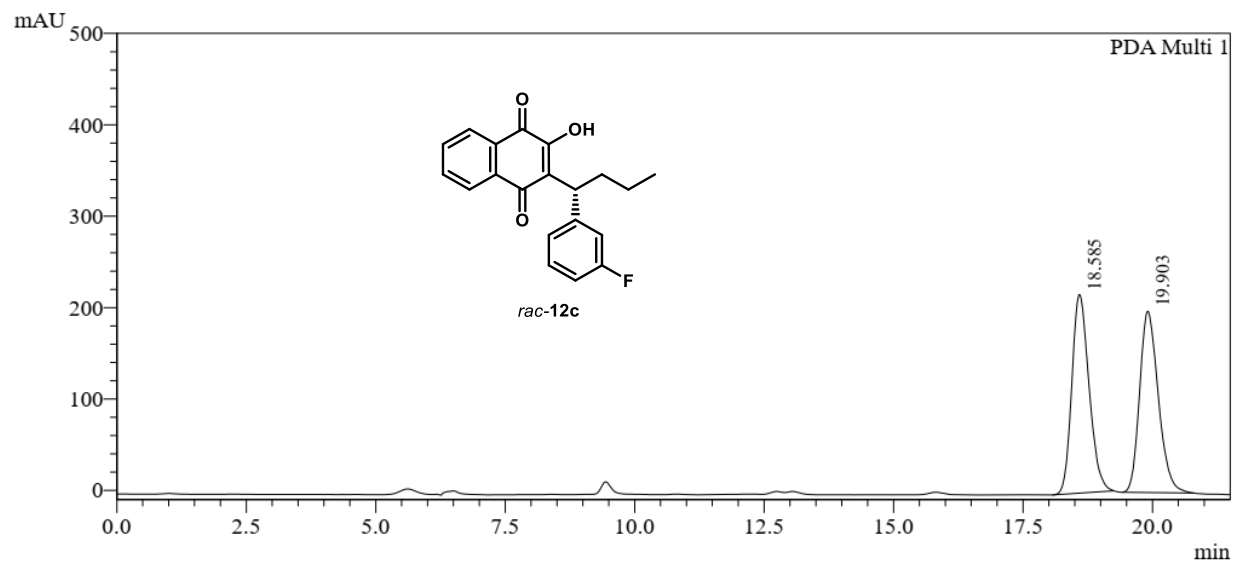

PeakTable

PDA Ch1 253nm 4nm

| Peak# | Ret. Time | Area     | Area %  |
|-------|-----------|----------|---------|
| 1     | 18.585    | 5030124  | 50.214  |
| 2     | 19.903    | 4987348  | 49.786  |
| Total |           | 10017472 | 100.000 |

Daicel Chiralpak AD-H column (95:5 *n*-Hexane/IPA, 0.5 mL/min, 20 °C)

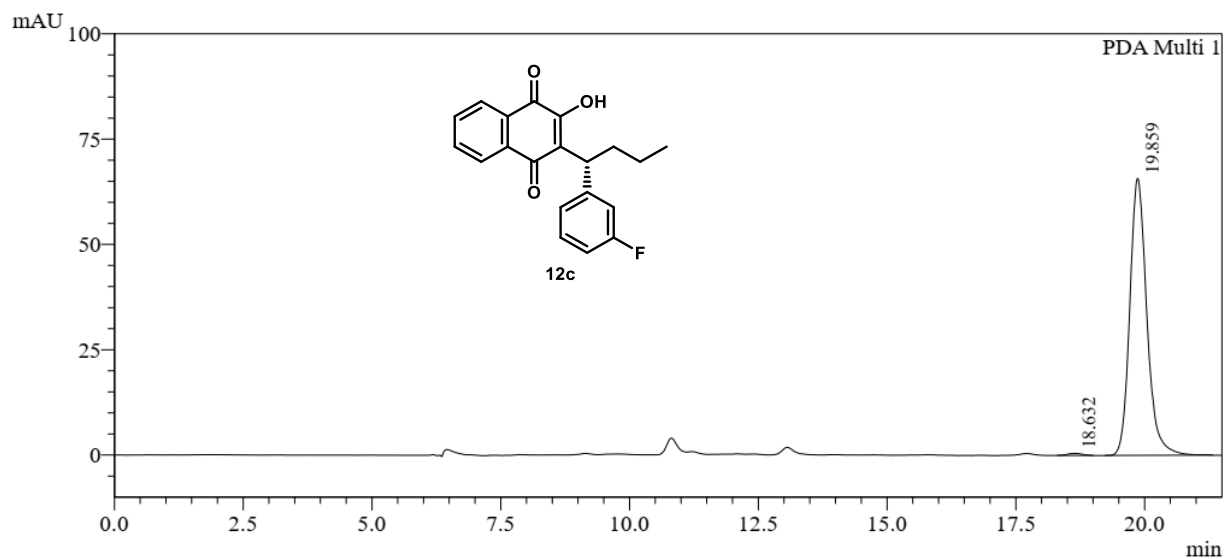

PeakTable

PDA Ch1 253nm 4nm

| Peak# | Ret. Time | Area    | Area %  |
|-------|-----------|---------|---------|
| 1     | 18.632    | 9576    | 0.629   |
| 2     | 19.859    | 1513637 | 99.371  |
| Total |           | 1523212 | 100.000 |

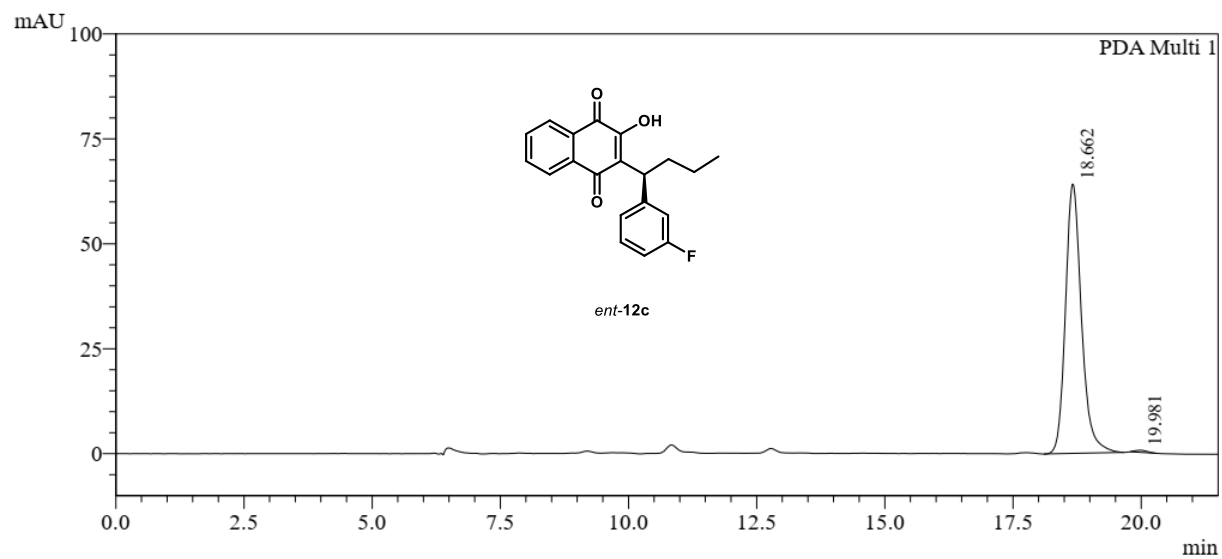

PeakTable

PDA Ch1 253nm 4nm

| Peak# | Ret. Time | Area    | Area %  |
|-------|-----------|---------|---------|
| 1     | 18.662    | 1395540 | 99.419  |
| 2     | 19.981    | 8151    | 0.581   |
| Total |           | 1403691 | 100.000 |

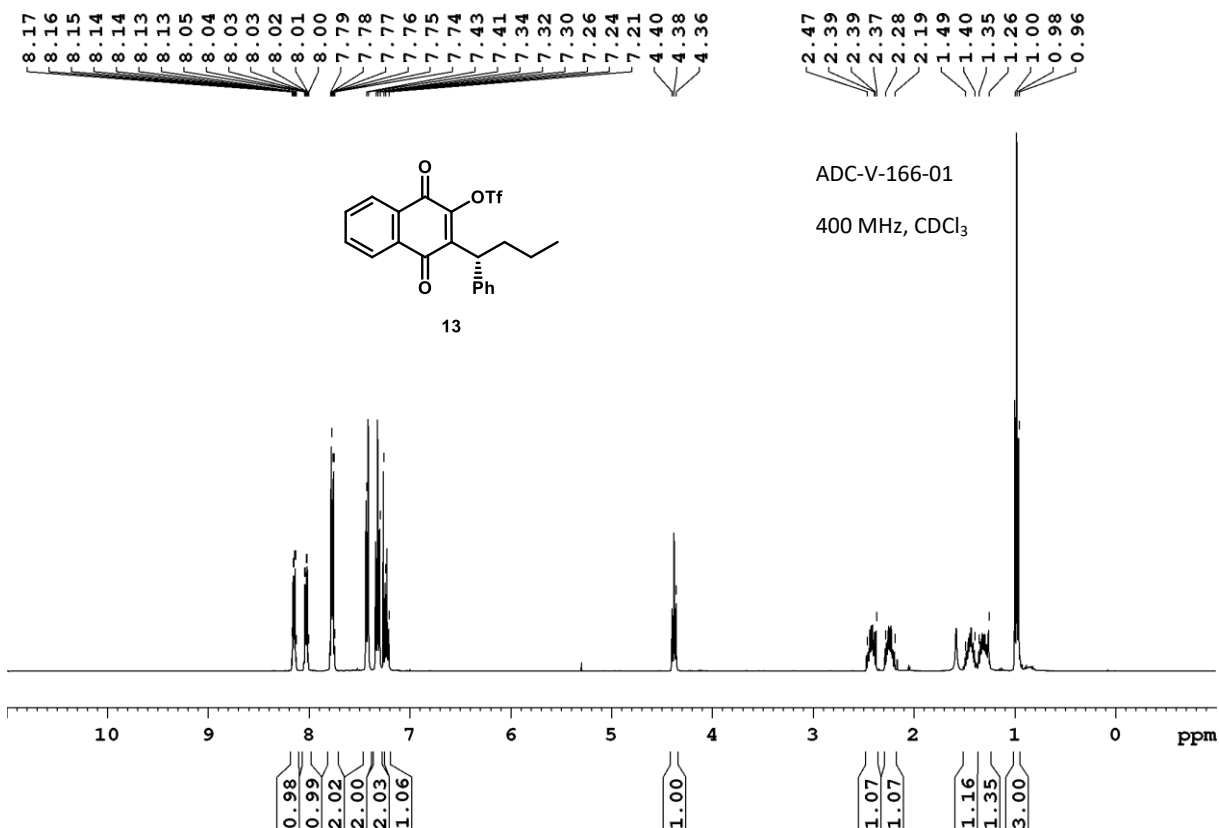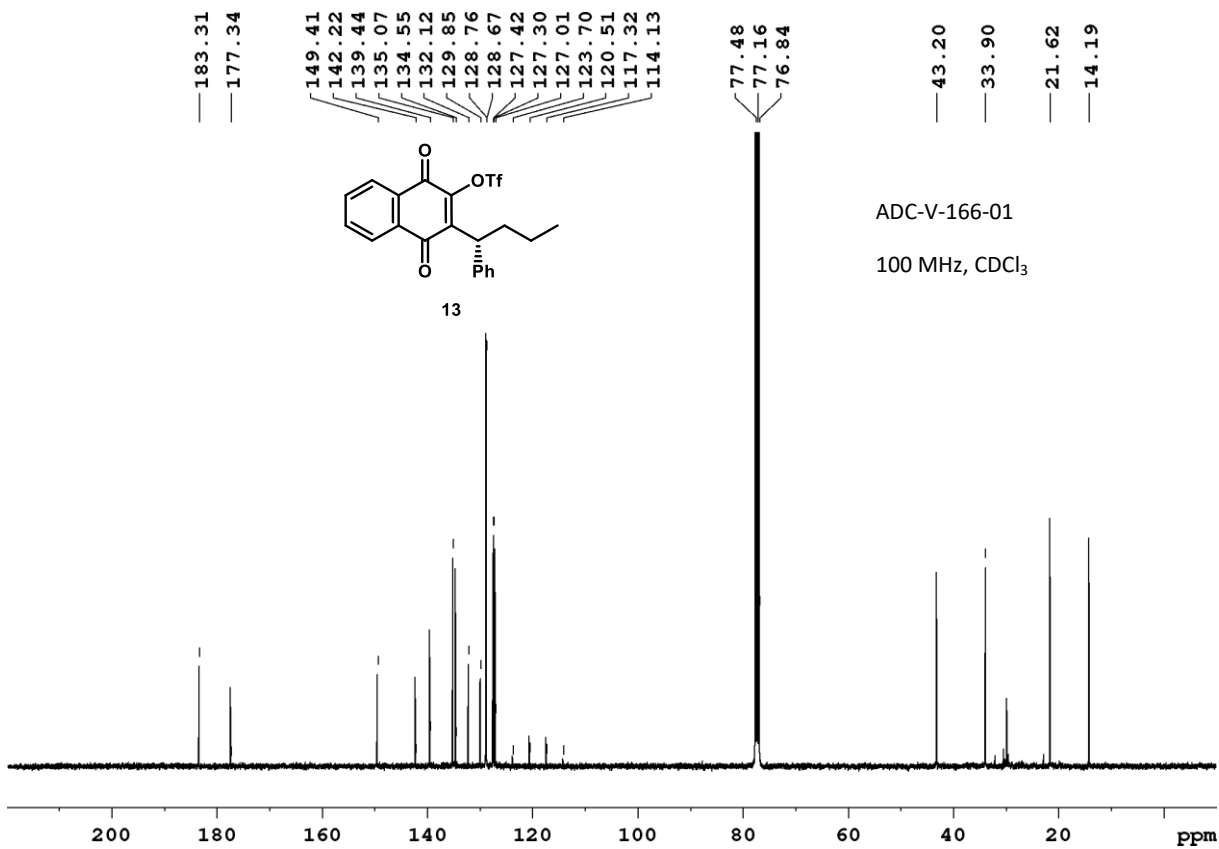

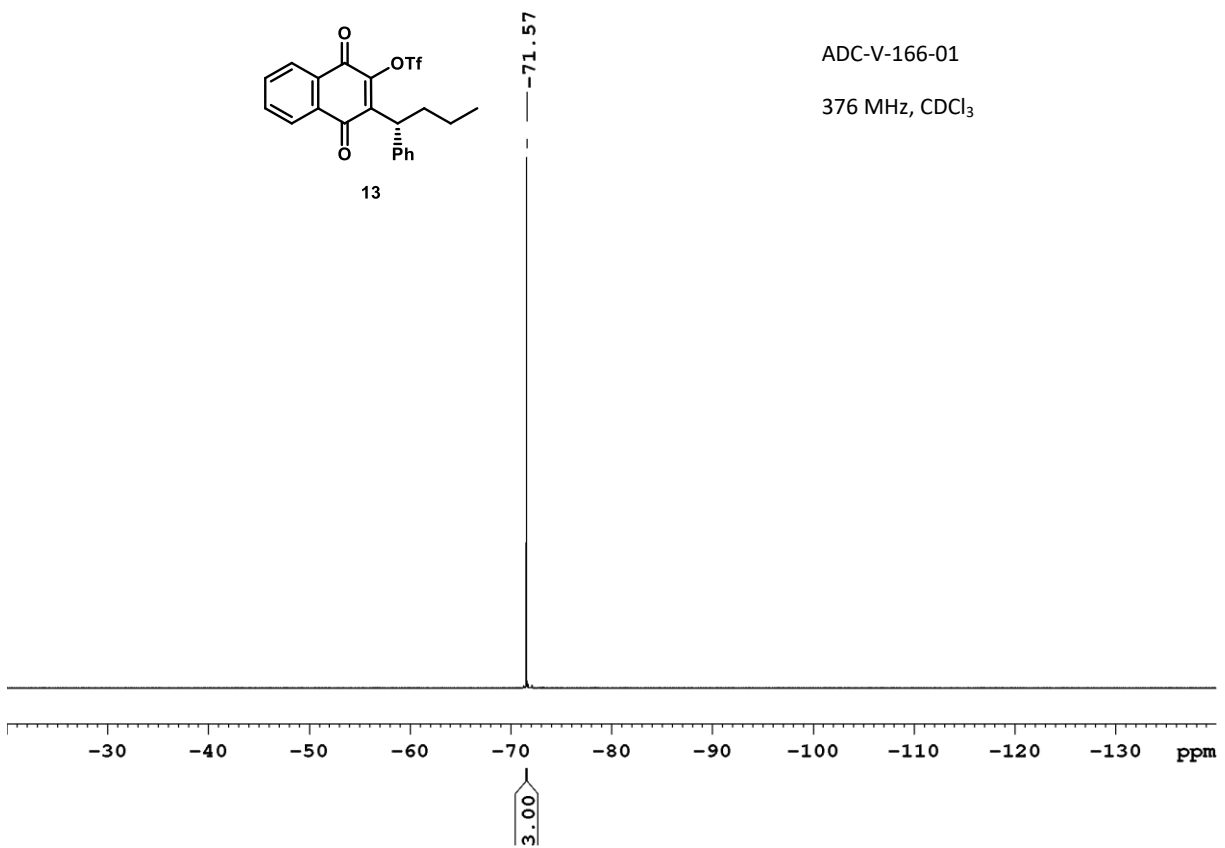

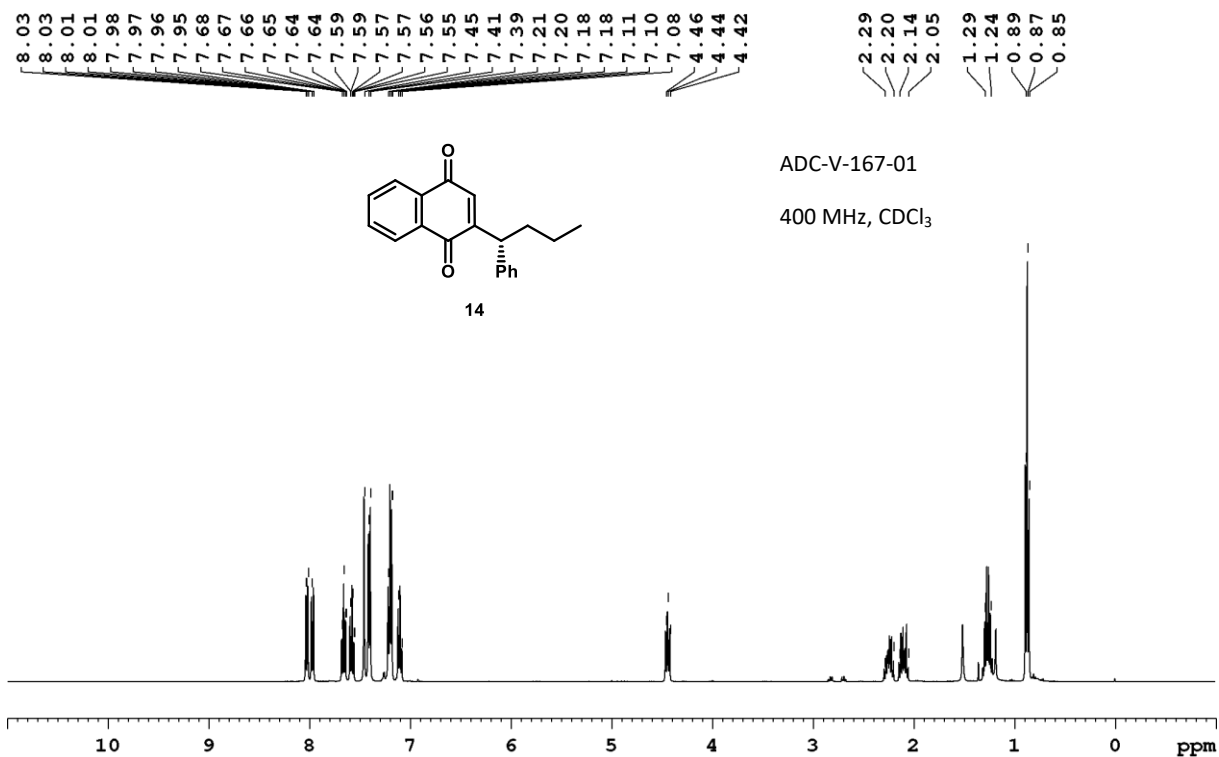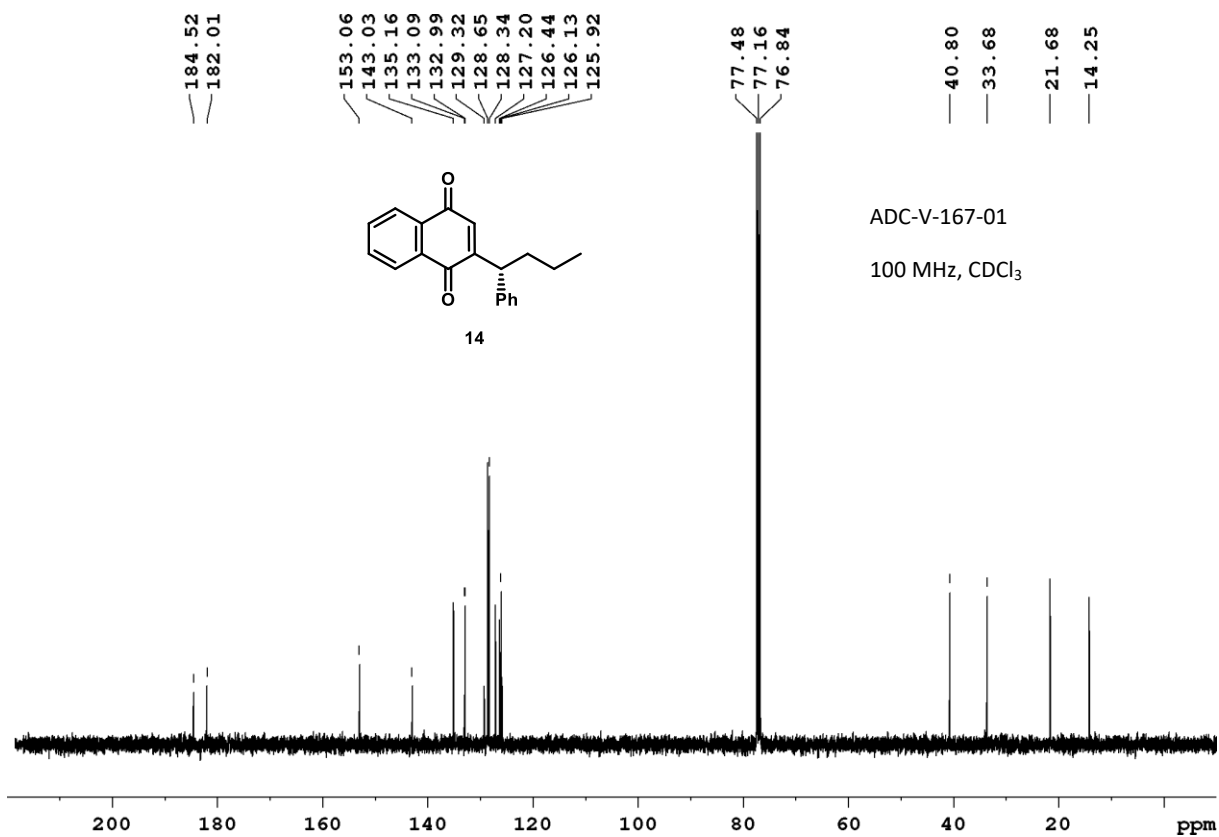

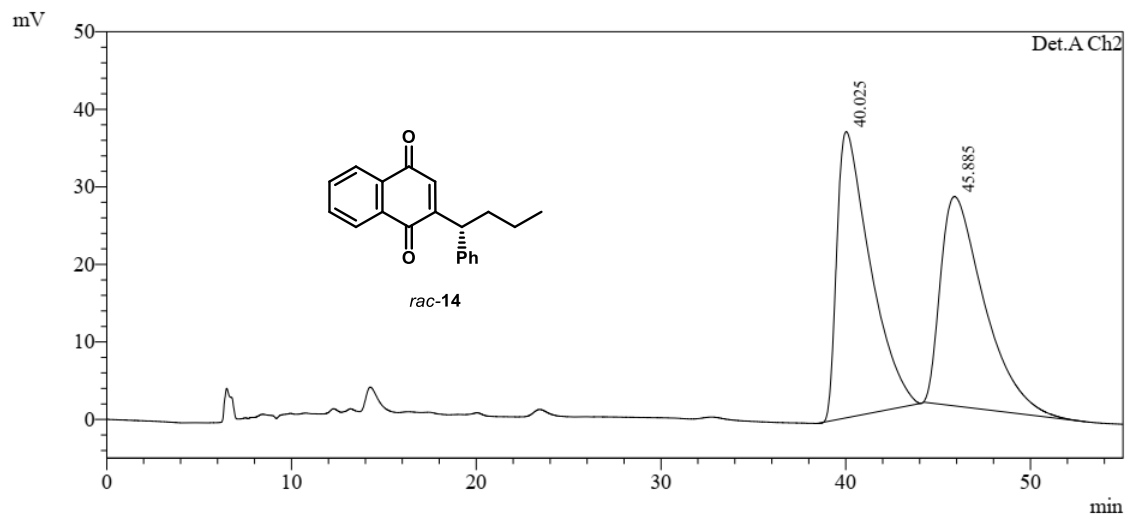

Detector A Ch2 254nm

| Peak# | Ret. Time | Area    | Area %  |
|-------|-----------|---------|---------|
| 1     | 40.025    | 4645109 | 51.002  |
| 2     | 45.885    | 4462520 | 48.998  |
| Total |           | 9107629 | 100.000 |

Phenomenex Cellulose-3column (90:10 *n*-Hexane/IPA, 1.0 mL/min, 20 °C)

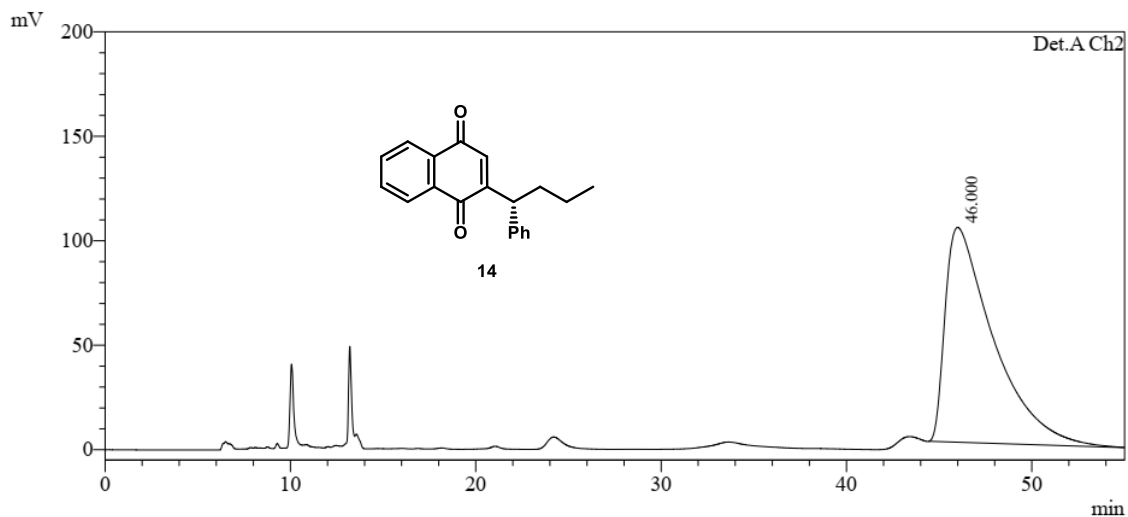

Detector A Ch2 254nm

| Peak# | Ret. Time | Area     | Area %  |
|-------|-----------|----------|---------|
| 1     | 46.000    | 18653712 | 100.000 |
| Total |           | 18653712 | 100.000 |

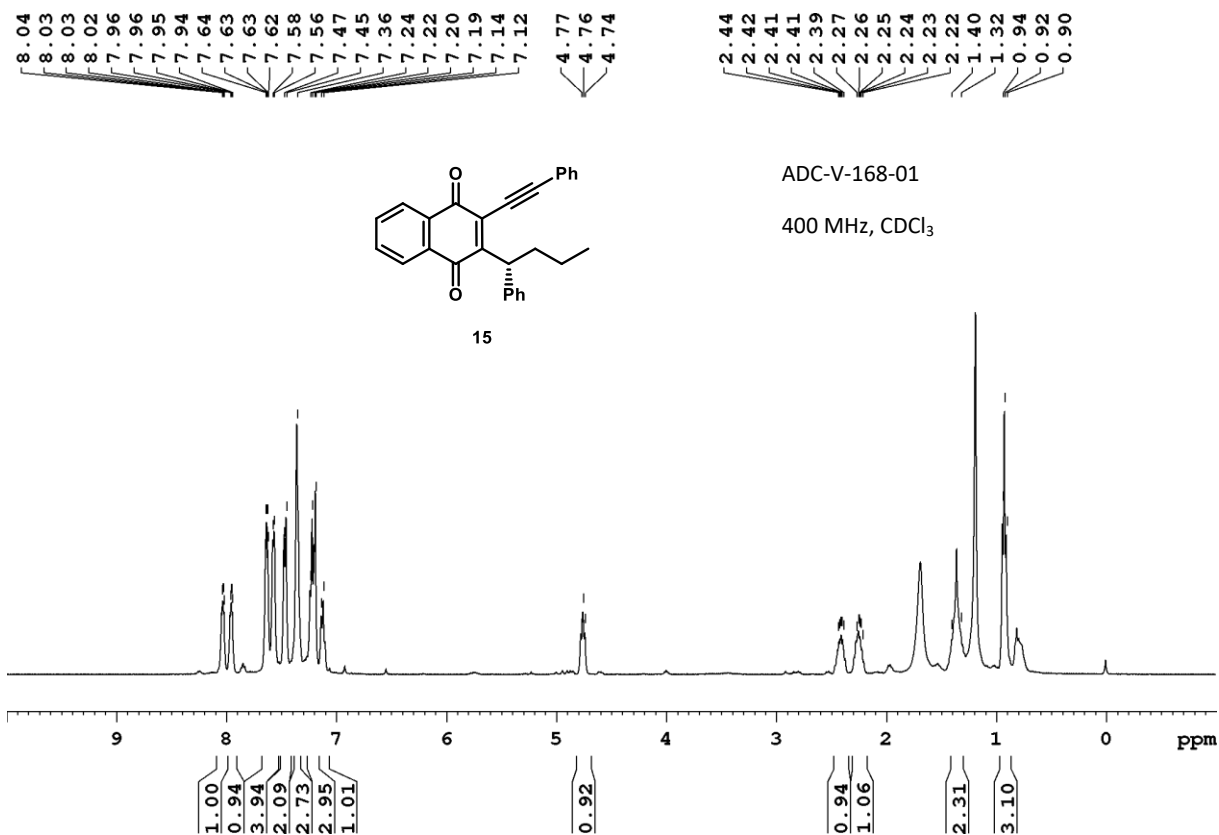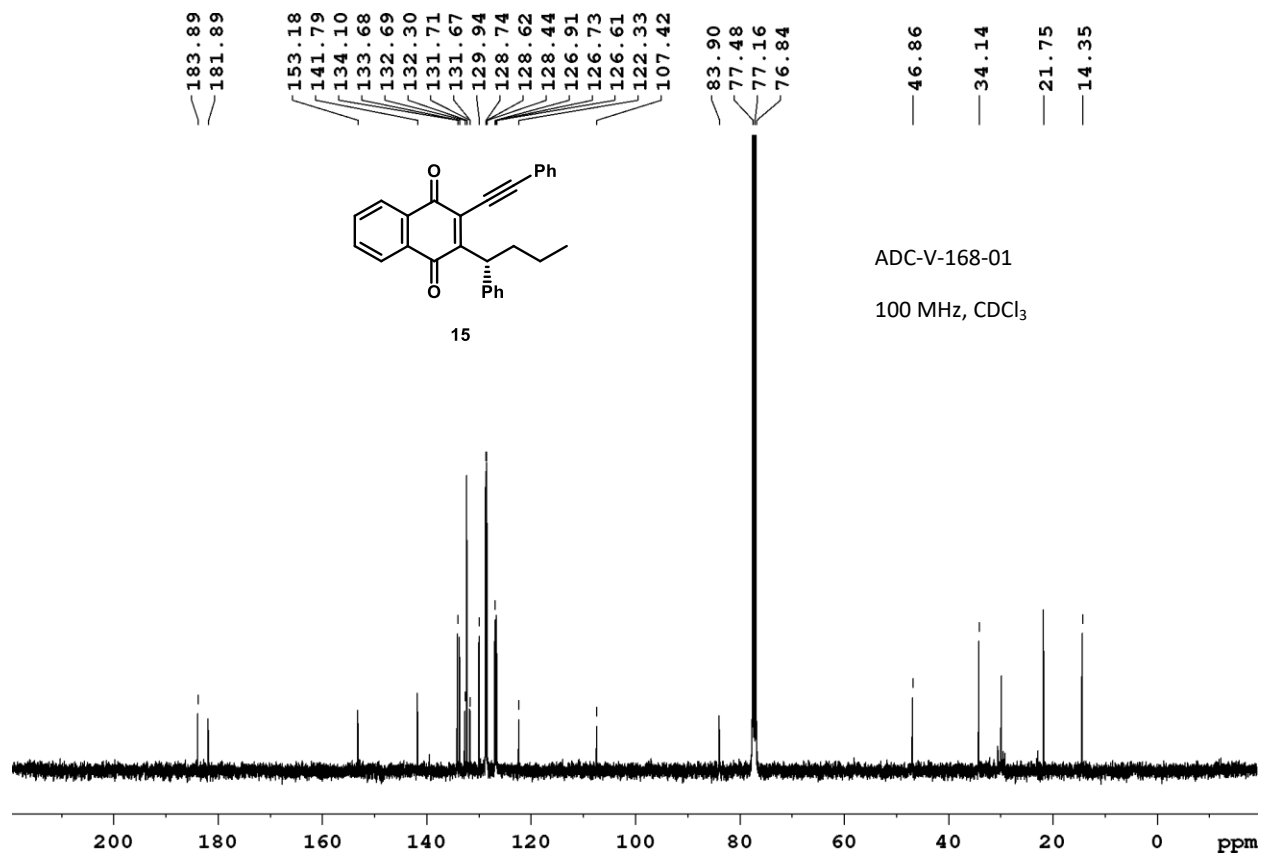

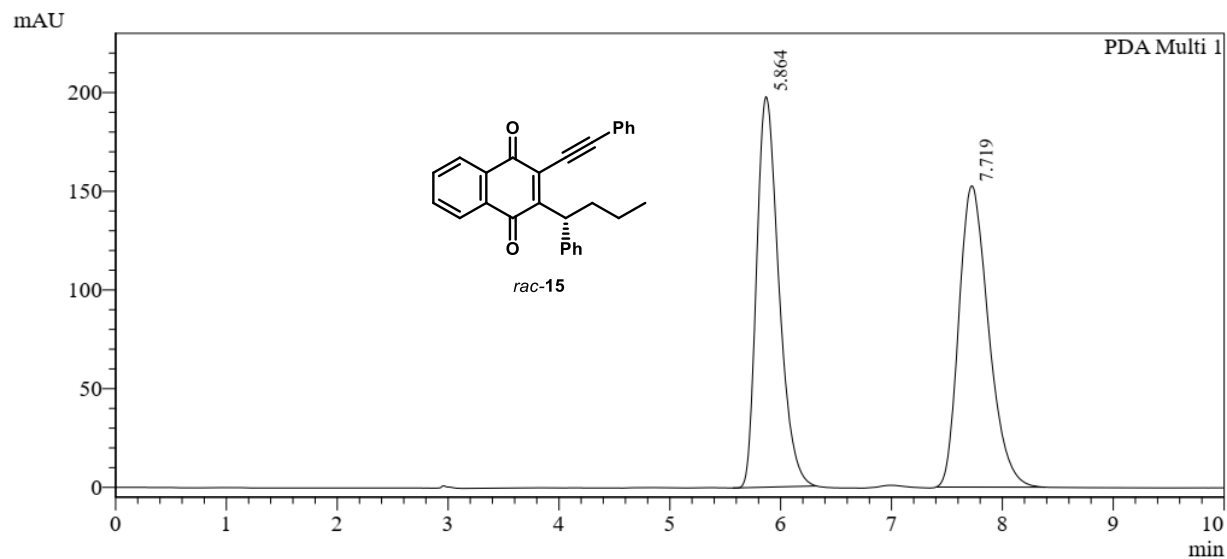

PeakTable

PDA Ch1 282nm 4nm

| Peak# | Ret. Time | Area    | Area %  |
|-------|-----------|---------|---------|
| 1     | 5.864     | 2753625 | 49.204  |
| 2     | 7.719     | 2842764 | 50.796  |
| Total |           | 5596389 | 100.000 |

Daicel Chiralpak AD-H column (90:10 *n*-Hexane/IPA, 1.0 mL/min, 20 °C)

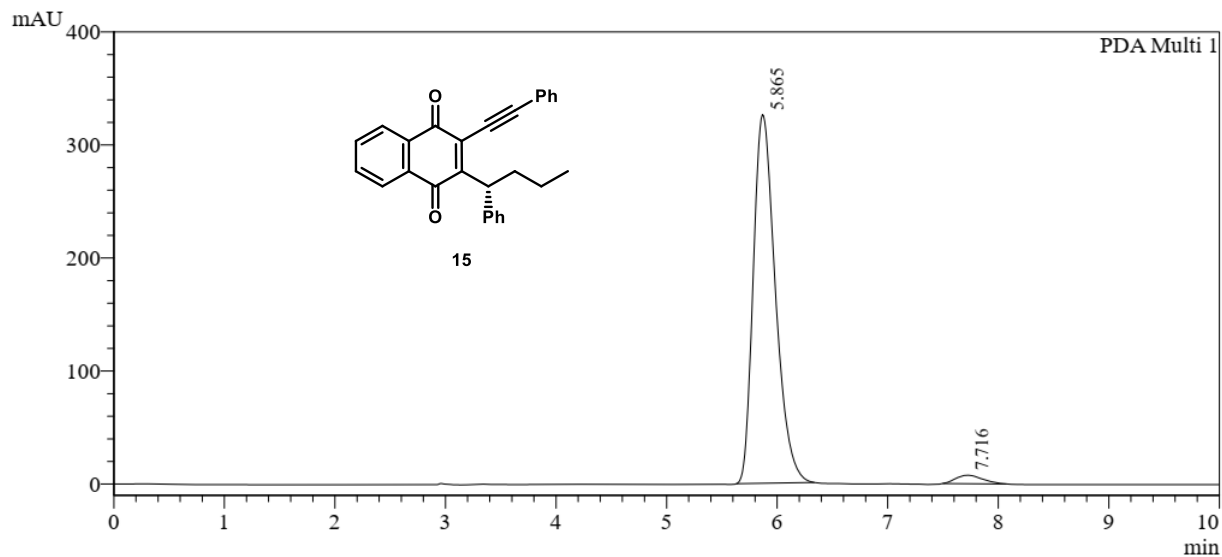

PeakTable

PDA Ch1 282nm 4nm

| Peak# | Ret. Time | Area    | Area %  |
|-------|-----------|---------|---------|
| 1     | 5.865     | 4529210 | 97.285  |
| 2     | 7.716     | 126380  | 2.715   |
| Total |           | 4655590 | 100.000 |
